# Supplementary material
Source: PubMed Central journal article supplement (PMC4961601)
Supplement: NIHMS790710-supplement-01.pdf [file NIHMS790710-supplement-01.pdf]

## **Supplementary Methods**

### *Crypt Isolation & Organoid Culture*

Crypts were isolated from the first 2-12cm of jejunum by incubating for 15 min with 5mM EDTA in HBSS at 4 °C with gentle agitation. Single cell suspension was prepared with dispase (Gibco 17105-041, 1.2 IU/ml) digestion at 37°C for 30 min, pipetting up and down every 10 min to mix. Based on fluorescence, single cells were sorted directly on top of 25µl Matrigel (modified from Sato et al., 2009) with 100 µl complete medium in 96 well plates. The purity of single cells was confirmed after sorting on a Nikon inverted microscope. The medium contains advanced DMEM/F12 (Invitrogen 10565-018) including N2 (Invitrogen 17502-048, 1X), B27 (Invitrogen 17504-044, 1X), N-Acetylcysteine (Sigma A9165, 1mM), mEGF (Invitrogen PMG8041, 50ng/ml), mNoggin (Peprotech 250-38, 100ng/ml) and R-spondin 1 (Wistar protein, 0.5µg/ml). In the first 48 hours after sorting, Jagged-1 (AnaSpec 61298, 1µM), Y-27632 (Selleck S1049, 10µM) and CHIR99021 (Stemgent 04-0004, 5µM) were also added to the medium but are not necessary for the follow-up culture.

### *Immunofluorescence Staining and Immunoblotting*

Tissue samples were fixed in Zinc Formalin (Polysciences 21516) overnight (14-16h) before alcohol dehydration, clearing with xylene, and paraffin embedding. Samples were cut into 5-micron sections. Paraffin-embedded sections (5µm) were deparaffinized in xylene and rehydrated in ethanol with increasing concentrations of water. Antigen retrieval was performed with pressure cooker in the presence of 1mM EDTA pH 8.0 for 3 minutes. Samples were permeabilized with 0.5% Triton X-100 in TBS. The following primary antibodies were used for immunostaining: Living Colors DsRed Polyclonal Antibody (1:200, Clontech 632496), Mouse-anti-E-cadherin (1:200, BD Transduction Laboratories 610181), Goat-anti-GFP (1:200, Abcam ab6673), Rabbit-anti-lysozyme (1:200, Dako F0372) and Cy2-, Cy3-, and Cy5- conjugated secondary antibodies were obtained from the Jackson ImmunoResearch Laboratories. For immunoblotting, 40,000 *Lgr5-eGFP-IRES-CreER*- or *Hopx-CreER*-marked cells were sorted into 50 µl 2X direct lysis buffer (2% SDS, 10mM DTT, 10% Glycerol, 2M Urea, 10mM Tris pH7.5). Final volume was adjusted to 100 µl, half of this was loaded to 4-12% SDS-PAGE, and transferred to PVDF membranes (GE Healthcare). Membranes were blocked in 5% BSA (Sigma, A1470) and then incubated with anti-Caspase3 primary antibody (1:1000, Cell Signaling, #9662) followed by incubation with a horseradish peroxidase (HRP) conjugated

secondary anti-rabbit (1:2,000, Cell Signaling, 7074). Immunoreactive proteins were visualized using LumiGLO chemiluminescent substrate (Pierce).

### *Confocal Imaging*

All the Tomato and GFP double fluorescence images were taken without antibody staining. Fresh isolated crypts were fixed immediately in 2% PFA for 5 min at 4°C with gentle agitation to avoid fluorescence quenching. Then crypt suspension was washed once in HBSS with 1% BSA and embedded in a thin layer of 4% low melting temperature agarose (Bio-Rad, #161-3111). Samples were held in glass base dish (Thermo Nunc, 150680) and images were acquired with Leica SP5-II confocal microscope.

### *Violin plots and PCA*

Violin plots were generated as follows. For each cell, we have a measure of the cycle time for 96 primer sets (48 genes with duplicate primer sets). A cycle value of 30 was imputed for any cycle values that did not amplify by 30 cycles (i.e., no signal). For each gene, violin plots were constructed using the statistical software R to compare the distribution of cycle times for that gene between the conditions. For PCA analysis, Fluidigm Ct values were averaged for each gene (across the two primer sets per gene) in each sample. Principal Components Analysis (PCA, using Partek Genomics Suite v6.6, Partek, Inc. St. Louis, MO) was used to visualize the global variation across the samples. Samples were colored to represent their condition.

### *Hierarchical clustering*

We calculated the Pearson correlation of the cycle values (across all 96 primer sets) between each pair of cells in all cell populations. These correlations were inputted into an agglomerative clustering algorithm to create a hierarchical clustering of all cells, with each population labeled with a different color. The R package 'hclust' was used (with the average linkage setting) to create the hierarchical clustering.

Supplementary Figure 1

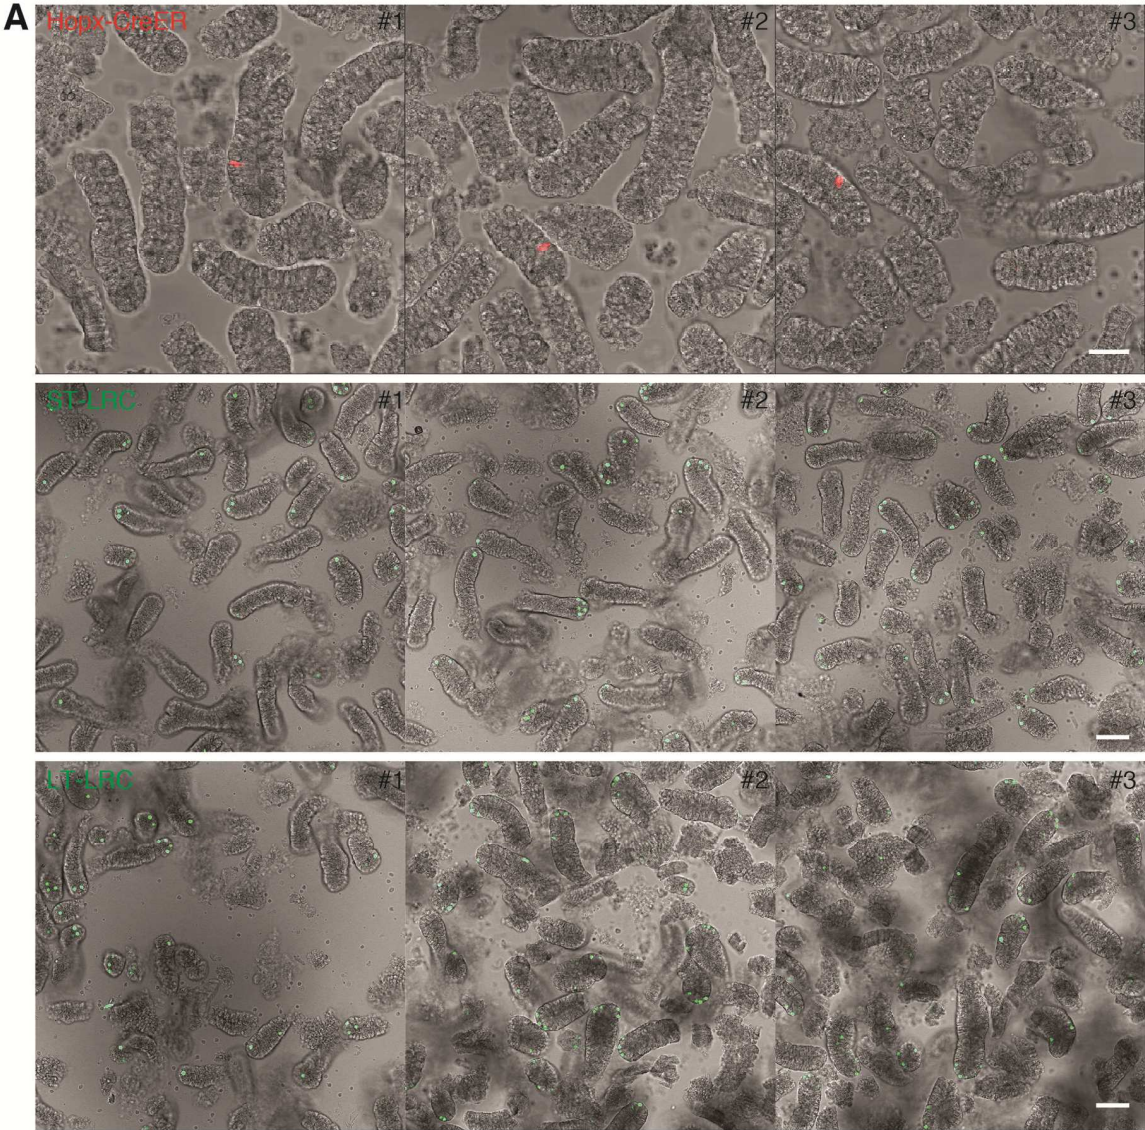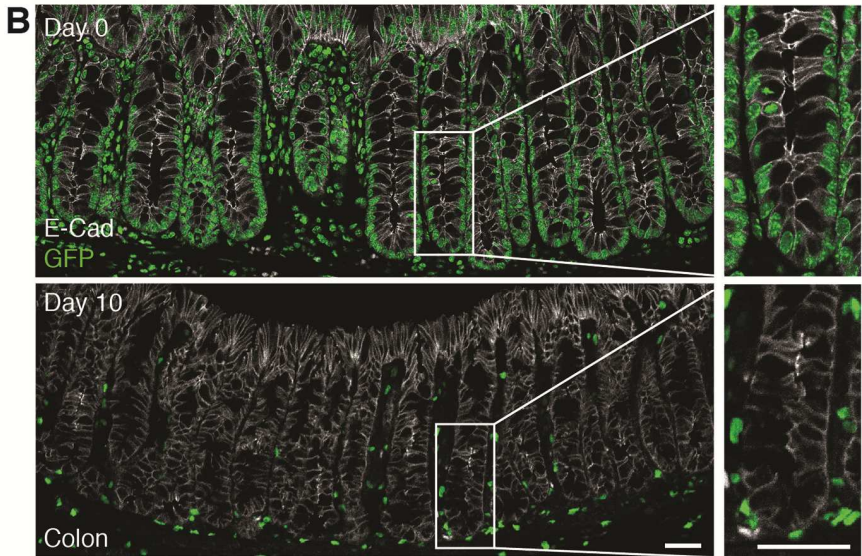

**Supplementary Figure 1. A.** Representative direct fluorescence images of *Hopx-CreER* ISCs (Red), 10-day short-term label retaining cells (ST-LRC, green) and one-month long-term label retaining cells (LT-LRC, green) in whole-mount crypt preparations from the jejunum. **B.** GFP staining of label retaining cells in the colon. Cells were fully labeled after the Dox pulse period (Day 0). Epithelial cells were stained with E-Cadherin. No label retaining epithelial cells were observed after a 10-day chase period. Scale bars: 50  $\mu$ m.

## Supplementary Figure 2

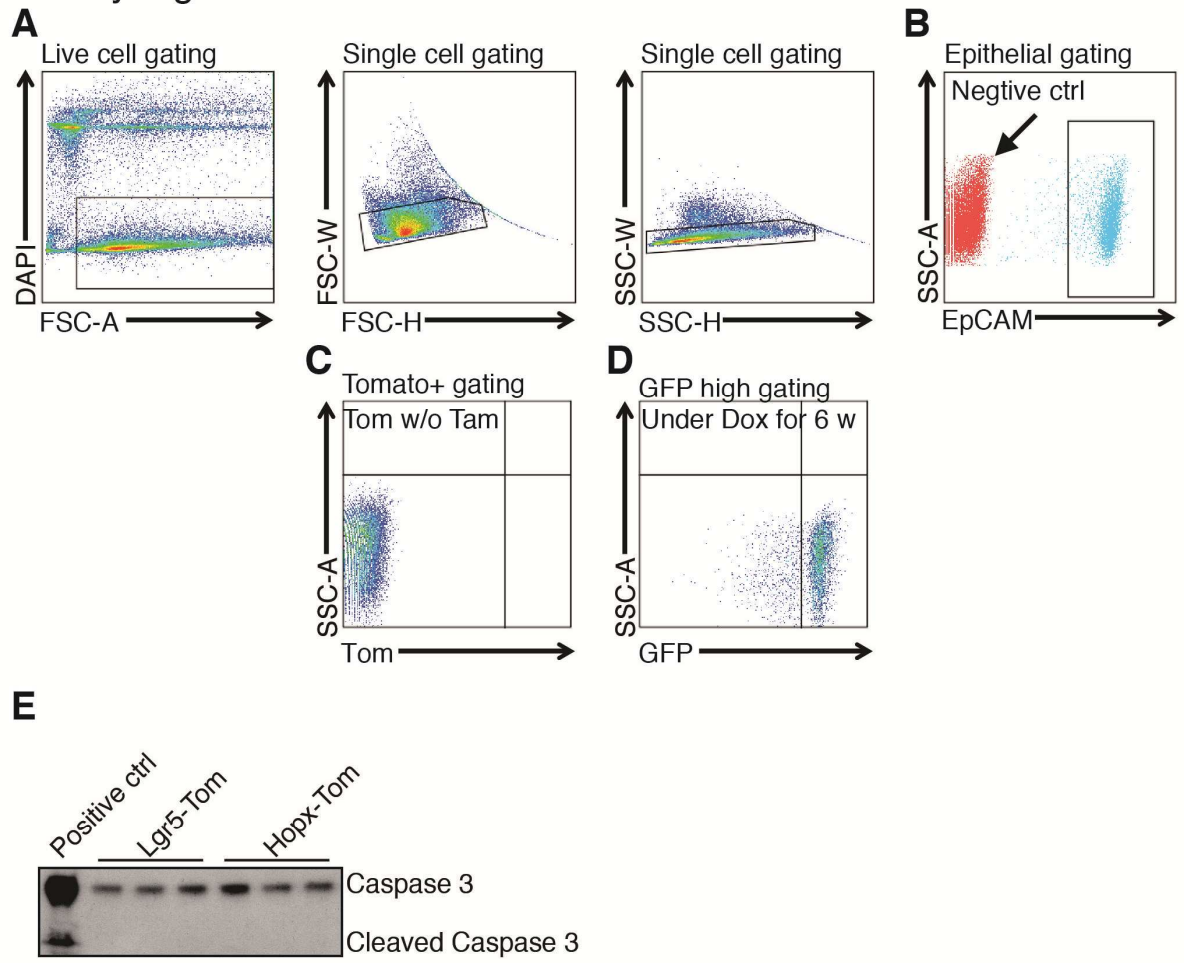

**Supplementary Figure 2.** **A** Gating strategy for single cell sorting from small intestinal crypt preparations. FSC-A = forward scatter area, SSC-A = side scatter area, FSC-H = forward scatter height, FSC-W = forward scatter width, SSC-H = side scatter height, SSC-W = side scatter width. **B.** Epithelial gating based on EpCAM staining. **C.** Tomato gating based on control *Hopx-CreER-Lox-Stop-Lox-tdTomato* not given Tamoxifen (analogous results are obtained using *Lox-Stop-Lox-tdTomato* mice with Tamoxifen, but lacking the *Hopx-CreER* allele, not shown). **D.** H2B-GFP high gating based on mice samples fully labeled at time=0 after the 6-week Dox pulse period. **E.** Western blot showing cleaved-Caspase 3 expression in *Hopx-CreER* and *Lgr5-CreER* cells isolated by flow sorting 18 hours after recombination of the *Lox-Stop-Lox-tdTomato* reporter with a single Tamoxifen injection.



# Supplementary Figure 3

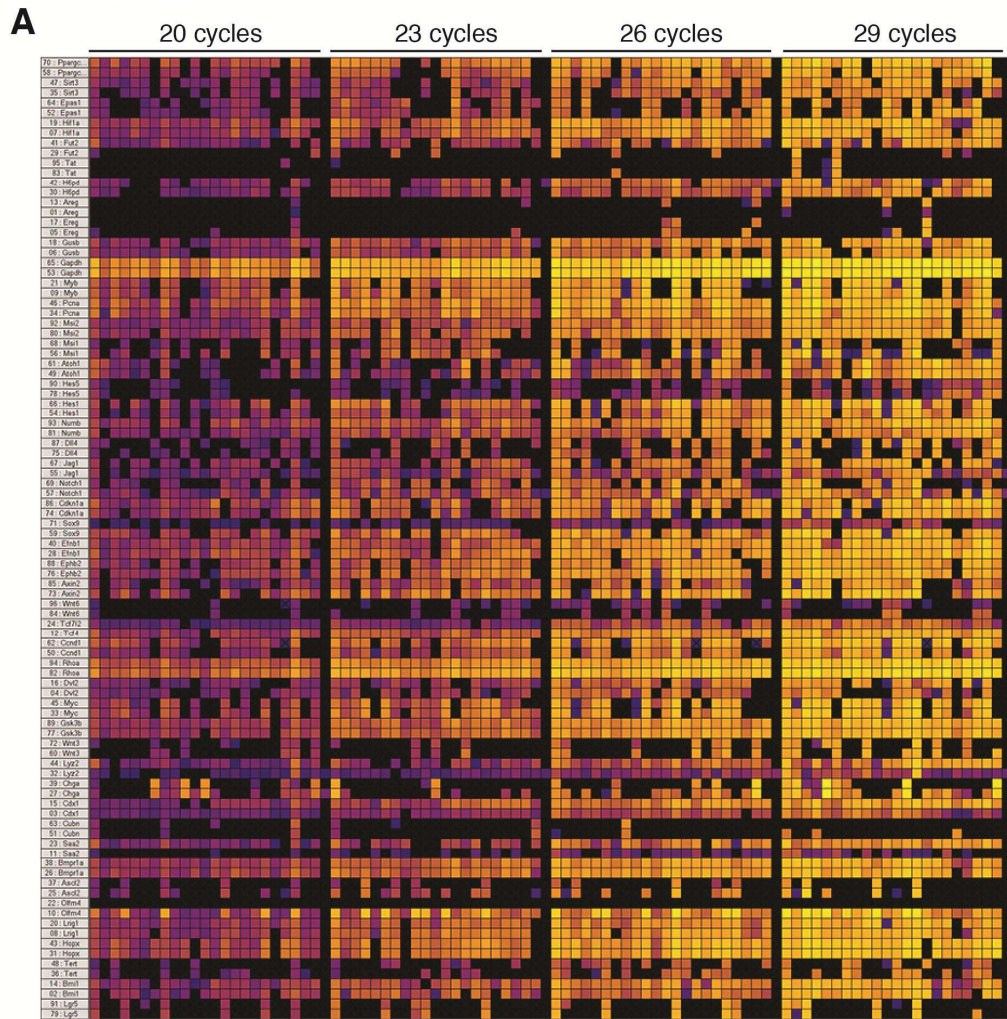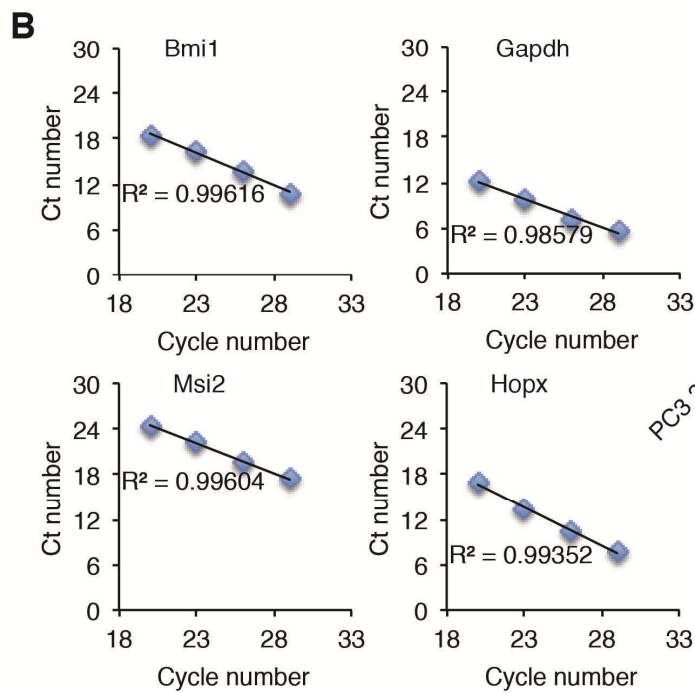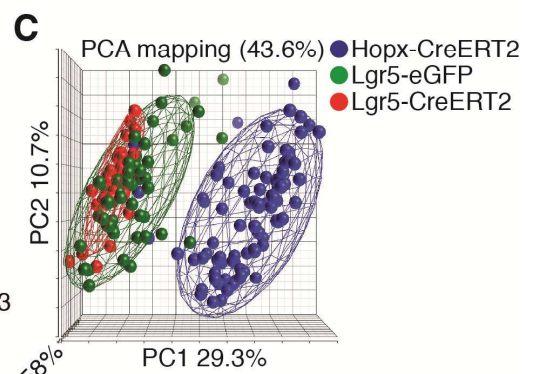

**Supplementary Figure 3. A.** Heat map view of the BioMark HD real-time RT-PCR analysis for various numbers of pre-amplification cycles. **B.** Linear amplification across the 4 different preamp conditions demonstrated for select primer sets (including the most highly expressed gene in the set, *Gapdh*) by plotting the pre-amplification cycles against threshold value (Ct). The data points represent the average expression value for the indicated gene across all of the single cells examined at the indicated cycle number and shown in the heatmap in **(A)**. The slope of a linear-regression trendline is indicative of linear amplification. **C.** Principal component analysis (PCA) of single cells based on Fluidigm Biomark gene expression profiles on cells sorted based on *Lgr5-eGFP*, *Lgr5-CreER::LSL-tdTomato* 18hrs post-Tam induction, and *Hopx-CreER::LSL-tdTomato* 18hrs post-Tam induction. Tam is given as a single intraperitoneal injection.



# Supplementary Figure 4

**A**

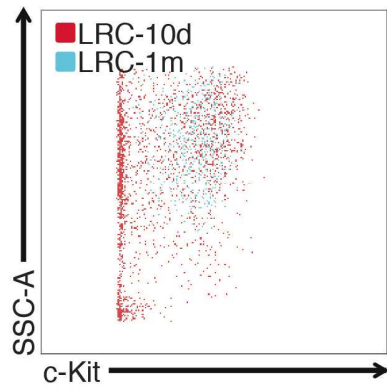

**B**

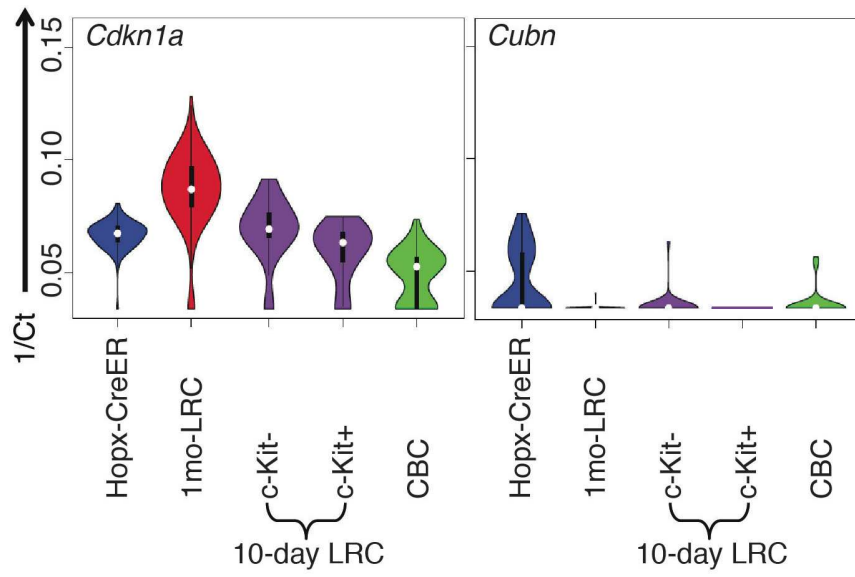

**Supplementary Figure 4. A.** 2D plot of c-Kit expression level across ST-LRC and LT-LRC groups. This data is presented as a histogram in main Figure 3A. **B.** Violin plots showing transcript levels of indicated genes in single reserve ISCs, LT-LRCs, ST-LRCs (separated into cKit<sup>+</sup> and cKit<sup>-</sup>), and CBCs.

Supplementary Figure 5

**A**

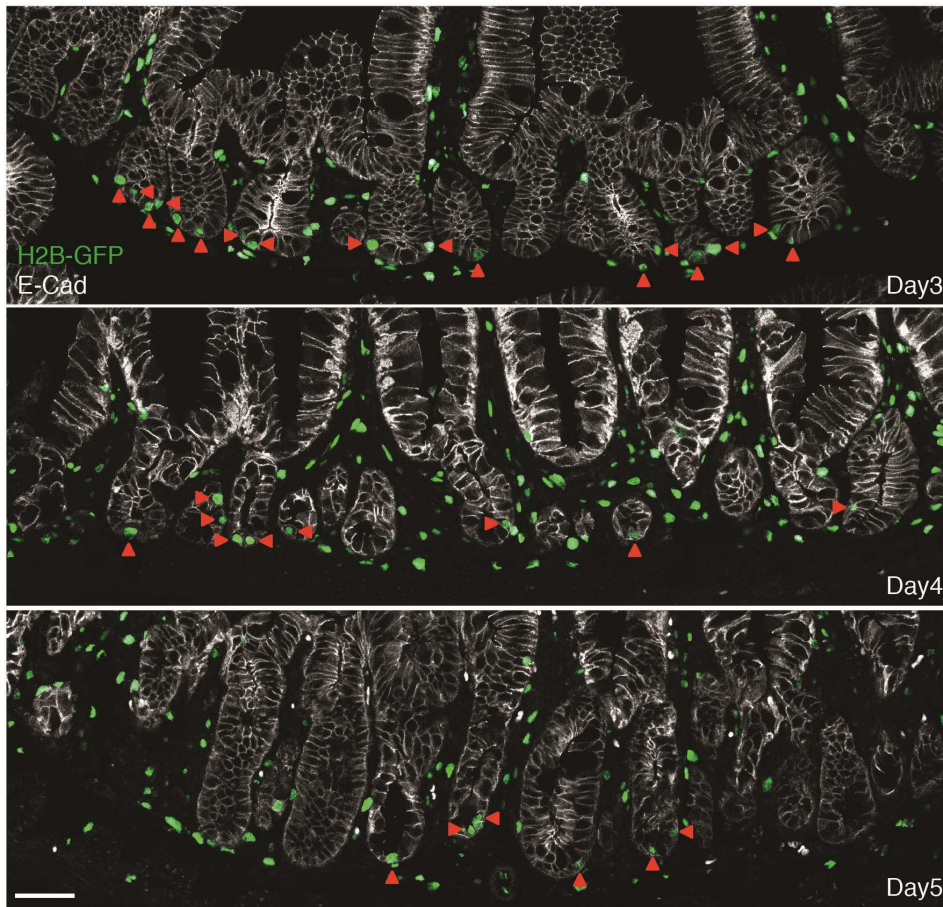

**B**

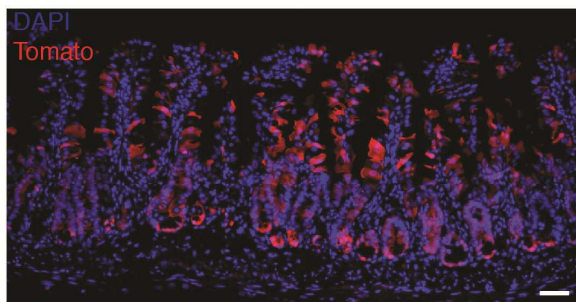

**C**

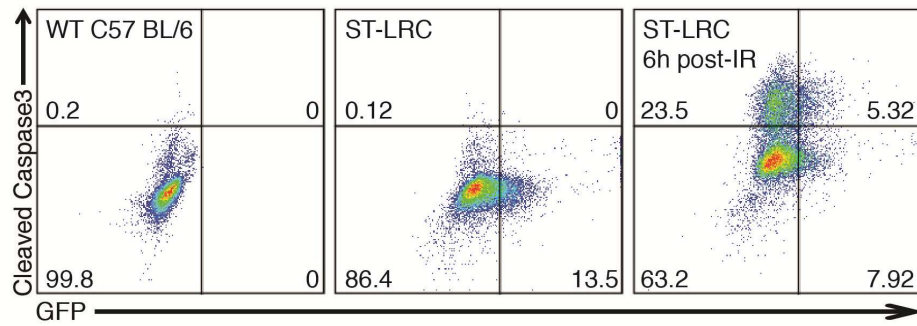

**Supplementary Figure 5.** **A.** Representative images of long-term label retaining cells at indicated timepoints after exposure to 12 Gy gamma-irradiation. **B.** Contribution of *Hopx-CreER* progeny to the regenerated epithelium 4 days after exposure to 12 Gy gamma-irradiation. *Hopx-CreER::LSL-tdTomato* mice were given three daily Tam injections followed by a 3 day washout period to avoid labeling of *de novo* generated cells with residual Tam after IR. Mice were then exposed to 12Gy whole-body irradiation and *Hopx-CreER* progeny analyzed 4 days later. Scale bars: 1mm. **C.** Flow cytometric data assessing level of cleaved-Caspase3 in ST-LRCs 6h post 12 Gy IR ( $2 \times 10^5$  cells recorded).

# Supplementary Figure 6

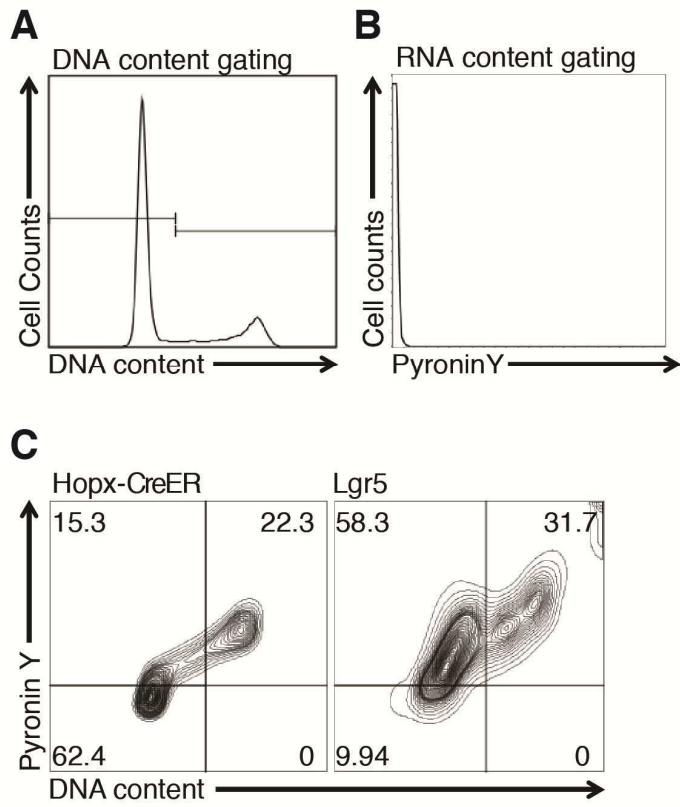



**Supplementary Figure 6. A.** Gating strategy for the separation of G0/G1 cells from S/G2/M cells, with gates set based on DNA content (left). **B.** RNA content staining control showing no stain background for Pyronin-Y. **C.** Analysis of quiescence with Pyronin-Y vs. DNA content in *Hopx-CreER* ISCs and *Lgr5-CreER* ISCs 18hrs after induction of the *LSL-tdTomato* reporter with a single Tam injection.

**Supplementary Table 1.**

Primer Sequences Used for Single-Cell Fluidigm Gene Expression Analysis.

**Supplementary Table 2.**

Single-Cell Fluidigm Profiling Raw Data and Group Information.

| Category                    | Well | Target | Assay ID    | Assay Name       |
|-----------------------------|------|--------|-------------|------------------|
| Msi1 microarray target      | A1   | Areg   | GEA00012812 | Areg_12812_i2    |
| Msi1 microarray target      | B1   | Areg   | GEP00054834 | Areg_54834_i0    |
| ISC signature genes         | C1   | Ascl2  | GEA00012005 | Ascl2_12005_i1   |
| ISC signature genes         | D1   | Ascl2  | GEP00054835 | Ascl2_54835_i0   |
| Notch pathway genes         | E1   | Atoh1  | GEP00054836 | Atoh1_54836_e0   |
| Notch pathway genes         | F1   | Atoh1  | GEP00054837 | Atoh1_54837_e0   |
| Wnt pathway genes           | G1   | Axin2  | GEA00023066 | Axin2_23066_i1   |
| Wnt pathway genes           | H1   | Axin2  | GEP00054838 | Axin2_54838_i2   |
| +4 marker                   | A2   | Bmi1   | GEP00054839 | Bmi1_54839_i7    |
| +4 marker                   | B2   | Bmi1   | GEA00007859 | Bmi1_7859_i1     |
| ISC signature genes         | C2   | Bmpr1a | GEA00013341 | Bmpr1a_13341_i10 |
| ISC signature genes         | D2   | Bmpr1a | GEP00054840 | Bmpr1a_54840_i1  |
| Wnt pathway genes           | E2   | Ccnd1  | GEP00054841 | Ccnd1_54841_i3   |
| Wnt pathway genes           | F2   | Ccnd1  | GEA00007896 | Ccnd1_7896_i1    |
| Wnt pathway genes           | G2   | Cdkn1a | GEA00011737 | Cdkn1a_11737_i1  |
| Wnt pathway genes           | H2   | Cdkn1a | GEP00054842 | Cdkn1a_54842_e1  |
| Enterocyte marker           | A3   | Cdx1   | GEA00017999 | Cdx1_17999_i1    |
| Enterocyte marker           | B3   | Cdx1   | GEP00054843 | Cdx1_54843_i0    |
| Enteroendocrine cell marker | C3   | Chga   | GEA00042799 | Chga_42799_i6    |
| Enteroendocrine cell marker | D3   | Chga   | GEP00054844 | Chga_54844_i1    |
| Late TA marker              | E3   | Cubn   | GEA00050545 | Cubn_50545_i65   |
| Late TA marker              | F3   | Cubn   | GEP00054845 | Cubn_54845_i1    |
| Notch pathway genes         | G3   | Dll4   | GEA00012028 | Dll4_12028_i8    |
| Notch pathway genes         | H3   | Dll4   | GEP00054847 | Dll4_54847_i1    |
| Wnt pathway genes           | A4   | Dvl2   | GEA00012035 | Dvl2_12035_i12   |
| Wnt pathway genes           | B4   | Dvl2   | GEP00054848 | Dvl2_54848_i1    |
| Wnt pathway genes           | C4   | Efnb1  | GEA00039231 | Efnb1_39231_i0   |
| Wnt pathway genes           | D4   | Efnb1  | GEP00054849 | Efnb1_54849_i2   |
| Msi1 microarray target      | E4   | Epas1  | GEA00017939 | Epas1_17939_i10  |
| Msi1 microarray target      | F4   | Epas1  | GEP00054850 | Epas1_54850_i1   |
| Wnt pathway genes           | G4   | Ephb2  | GEA00047674 | Ephb2_47674_i7   |
| Wnt pathway genes           | H4   | Ephb2  | GEP00054851 | Ephb2_54851_i1   |
| Msi1 microarray target      | A5   | Ereg   | GEA00039249 | Ereg_39249_i1    |
| Msi1 microarray target      | B5   | Ereg   | GEP00054852 | Ereg_54852_i3    |
| Msi1 microarray target      | C5   | Fut2   | GEA00035406 | Fut2_35406_i0    |
| Msi1 microarray target      | D5   | Fut2   | GEP00054853 | Fut2_54853_e1    |
| House keeping               | E5   | Gapdh  | GEP00054854 | Gapdh_54854_i0   |
| House keeping               | F5   | Gapdh  | GEA00007851 | Gapdh_7851_i0    |
| Wnt pathway genes           | G5   | Gsk3b  | GEA00012056 | Gsk3b_12056_i8   |
| Wnt pathway genes           | H5   | Gsk3b  | GEP00054855 | Gsk3b_54855_i1   |
| House keeping               | A6   | Gusb   | GEA00002621 | Gusb_2621_i9     |
| House keeping               | B6   | Gusb   | GEP00054856 | Gusb_54856_i1    |
| Msi1 microarray target      | C6   | H6pd   | GEA00039411 | H6pd_39411_i3    |
| Msi1 microarray target      | D6   | H6pd   | GEP00054857 | H6pd_54857_i1    |
| Notch pathway genes         | E6   | Hes1   | GEA00011756 | Hes1_11756_i2    |
| Notch pathway genes         | F6   | Hes1   | GEP00054858 | Hes1_54858_i1    |

|                        |     |          |             |                    |
|------------------------|-----|----------|-------------|--------------------|
| Notch pathway genes    | G6  | Hes5     | GEA00023038 | Hes5_23038_e2      |
| Notch pathway genes    | H6  | Hes5     | GEP00054859 | Hes5_54859_e2      |
| Msi1 microarray target | A7  | Hif1a    | GEA00012863 | Hif1a_12863_i5     |
| Msi1 microarray target | B7  | Hif1a    | GEP00054860 | Hif1a_54860_i1     |
| +4 marker              | C7  | Hopx     | GEA00017934 | Hopx_17934_i1      |
| +4 marker              | D7  | Hopx     | GEP00054861 | Hopx_54861_i1      |
| Notch pathway genes    | E7  | Jag1     | GEA00012064 | Jag1_12064_i4      |
| Notch pathway genes    | F7  | Jag1     | GEP00054862 | Jag1_54862_i1      |
| CBC marker             | G7  | Lgr5     | GEP00054863 | Lgr5_54863_i4      |
| CBC marker             | H7  | Lgr5     | GEA00008792 | Lgr5_8792_i0       |
| +4 marker              | A8  | Lrig1    | GEA00048532 | Lrig1_48532_i12    |
| +4 marker              | B8  | Lrig1    | GEP00054864 | Lrig1_54864_i1     |
| Paneth cell marker     | C8  | Lyz2     | GEA00038173 | Lyz2_38173_i0      |
| Paneth cell marker     | D8  | Lyz2     | GEP00054865 | Lyz2_54865_e3      |
| Msi family members     | E8  | Msi1     | GEA00047393 | Msi1_47393_i6      |
| Msi family members     | F8  | Msi1     | GEP00054866 | Msi1_54866_i1      |
| Msi family members     | G8  | Msi2     | GEA00011622 | Msi2_11622_i1      |
| Msi family members     | H8  | Msi2     | GEP00054867 | Msi2_54867_i4      |
| Proliferation genes    | A9  | Myb      | GEA00012892 | Myb_12892_i5       |
| Proliferation genes    | B9  | Myb      | GEP00054869 | Myb_54869_i1       |
| Wnt pathway genes      | C9  | Myc      | GEA00011771 | Myc_11771_i1       |
| Wnt pathway genes      | D9  | Myc      | GEP00054870 | Myc_54870_i0       |
| Notch pathway genes    | E9  | Notch1   | GEA00011772 | Notch1_11772_i4    |
| Notch pathway genes    | F9  | Notch1   | GEP00054871 | Notch1_54871_i1    |
| Notch pathway genes    | G9  | Numb     | GEA00012081 | Numb_12081_i3      |
| Notch pathway genes    | H9  | Numb     | GEP00054872 | Numb_54872_i0      |
| ISC signature genes    | A10 | Olfm4    | GEA00053197 | Olfm4_53197_i0     |
| ISC signature genes    | B10 | Olfm4    | GEP00054873 | Olfm4_54873_i5     |
| Proliferation genes    | C10 | Pcna     | GEA00012609 | Pcna_12609_i2      |
| Proliferation genes    | D10 | Pcna     | GEP00054874 | Pcna_54874_e0      |
| Msi1 microarray target | E10 | Ppargc1b | GEA00046119 | Ppargc1b_46119_i11 |
| Msi1 microarray target | F10 | Ppargc1b | GEP00054875 | Ppargc1b_54875_i1  |
| Wnt pathway genes      | G10 | Rhoa     | GEA00012108 | Rhoa_12108_i2      |
| Wnt pathway genes      | H10 | Rhoa     | GEP00054876 | Rhoa_54876_i4      |
| Late TA marker         | A11 | Saa2     | GEA00038532 | Saa2_38532_i2      |
| Late TA marker         | B11 | Saa2     | GEP00054877 | Saa2_54877_e3      |
| Msi1 microarray target | C11 | Sirt3    | GEA00042427 | Sirt3_42427_i3     |
| Msi1 microarray target | D11 | Sirt3    | GEP00054878 | Sirt3_54878_i5     |
| Wnt pathway genes      | E11 | Sox9     | GEA00037224 | Sox9_37224_i0      |
| Wnt pathway genes      | F11 | Sox9     | GEP00054879 | Sox9_54879_i1      |
| Msi1 microarray target | G11 | Tat      | GEA00011896 | Tat_11896_i6       |
| Msi1 microarray target | H11 | Tat      | GEP00054880 | Tat_54880_i3       |
| Wnt pathway genes      | A12 | Tcf4     | GEA00013322 | Tcf4_13322_i4      |
| Wnt pathway genes      | B12 | Tcf4     | GEP00054881 | Tcf4_54881_i6      |
| +4 marker              | C12 | Tert     | GEA00011787 | Tert_11787_i6      |
| +4 marker              | D12 | Tert     | GEP00054882 | Tert_54882_i1      |
| Wnt pathway genes      | E12 | Wnt3     | GEA00012126 | Wnt3_12126_i2      |

|                   |     |      |             |               |
|-------------------|-----|------|-------------|---------------|
| Wnt pathway genes | F12 | Wnt3 | GEP00054883 | Wnt3_54883_i3 |
| Wnt pathway genes | G12 | Wnt6 | GEA00010000 | Wnt6_10000_i2 |
| Wnt pathway genes | H12 | Wnt6 | GEP00054884 | Wnt6_54884_i1 |

| FP                      | RP                         | Design RefSeq  |
|-------------------------|----------------------------|----------------|
| GCATTCATGGCGAATGCAGATA  | TCTCCACACCGTTCACCAA        | NM_009704.3    |
| CAATGAGAACTCCGCTGCTAC   | GCTCCAAAGCAGCTGCATAA       | NM_009704.3    |
| CAGGAGCTGCTTGACTTTTTCC  | GTAGGTCCACCAGGAGTCAC       | NM_008554.3    |
| ATCTGCCCGGAGCATGGAA     | CACTGCTGCAGGACTCCCTA       | NM_008554.3    |
| TCGTATCTCTGCCTCTGGTCT   | TTTGTGAGTGAGCGCAACAC       | NM_007500.4    |
| CCGTCCTTCAACAACGACAA    | TCCGACAGAGCGTTGATGTA       | NM_007500.4    |
| GATCCACGGAAACAGCTGAA    | AGCCGGAACCTACGTGATAA       | NM_015732.4    |
| CCAACGACAGCGAGTTATCC    | TTCTTACTCCCCATGCGGTAA      | NM_015732.4    |
| GCAGCAATGACTGTGATGCA    | CAATGTCCATTAGCGTGTAGTAATCC | NM_007552.4    |
| CCTGTGTGGAGGGTACTTCA    | TGCTGGTCTCCAAGTAACGTA      | NM_007552.4    |
| GGAAATGGCTCGTCGTTGTA    | CACTGGGCACCATGTTGTAA       | NM_009758.4    |
| GGTCAAAGCTGTTCCGGAGAA   | TTTACCTGCTGCTTTCTTCA       | NM_009758.4    |
| CTCTCCTGCTACCGCACAA     | CTTGACTCCAGAAGGGCTTCA      | NM_007631.2    |
| TGCCGAGAAGTTGTGCATCTA   | TGTTACCAGAAGCAGTTCCA       | NM_007631.2    |
| GAACATCTCAGGGCCGAAAAC   | TCTGCGCTTGGAGTGATAGAA      | NM_007669.4    |
| GACAAGAGGCCAGTACTTCC    | AGAGTGCAAGACAGCGACAA       | NM_001111099.1 |
| GCTAACCTGGGGCTCACA      | GTGTGGGAGTGCCATCCA         | NM_009880.3    |
| GGACGCCCTACGAATGGAT     | TTGTCCTTGGTTCGGGTCTT       | NM_009880.3    |
| CCCGAAGTACTTTGAGGAA     | ATGGCTGACAGGCTCTCTA        | NM_007693.1    |
| TTTTGCCCTTCTGTGAACA     | TCGGAGATGACTTCCAGGAC       | NM_007693.1    |
| TCAATGGTCCAGATGCCAAC    | AAGCATGAAAGGTGCTACC        | NM_001081084.2 |
| GATGACCTTGGCGAATGTTTACA | CGAGTTAAGTTGGTGGACTTGAC    | NM_001081084.2 |
| GAGAAGGTGCCACTTCGGTTA   | TAGAGTCCCTGGGAGAGCAAA      | NM_019454.3    |
| CCTTCGTCGTCAGGGACAA     | CAAGCTTGGATGTTGAGTGAGAA    | NM_019454.3    |
| TTATGTCTTCGGGGACCTCA    | CACTGGAACCGTCATTGTCA       | NM_007888.3    |
| GATGACAATGCCCCTAC       | TGTGGGGTATCTGACGACAC       | NM_007888.3    |
| CGTGTCTGGAGCTCTCTTAA    | TGATGTCCAGCTTGTCTCAA       | NM_010110.4    |
| AGCTTGGAGGGACTGGAGAA    | GTCAACTGCTCGGGTGTCA        | NM_010110.4    |
| AAGCTTTTCGCCATGGACAC    | CAAGGTCTCCAAATCCAGTTCAC    | NM_010137.3    |
| ATCAGCTTCTTCGGACACA     | ATTTGCTGGTTCGGCCTCA        | NM_010137.3    |
| TGGTCGTCATTGCCATCGTA    | GTGTTGTAGCTTGTCCGTGTAC     | NM_010142.2    |
| CTGATGGACTCTACGACAGCAA  | GTAGCCGCTCACCTCTTCC        | NM_010142.2    |
| TCCCAGGAGAATCCGAGGATA   | AATCTGCACTTGAGCCACAC       | NM_007950.2    |
| TCATCATAACCGCTGGATGCA   | CCCCTGAGGTCACTCTCTATA      | NM_007950.2    |
| AAGAGCCAAGCTGGAAGATACA  | GGGCCAGAGGAAAGGAGAAA       | NM_018876.3    |
| TGTCCTTGGTCCCATTCCA     | AAGGCACACATCTCCAGTA        | NM_018876.3    |
| AGAGACGGCCGCATCTTC      | TTCACACCGACCTTCACCATT      | NM_008084.2    |
| AGACGGCCGCATCTTCTT      | TTCACACCGACCTTCACCAT       | NM_008084.2    |
| GACACACCTGCACTCTTCAAC   | CCGAGCATGTGGAGGGATAA       | NM_019827.6    |
| TGGAGAACTGGTTGCCATCA    | TGTTACAGTGGTCTAGCTTTCTCA   | NM_019827.6    |
| AGTATGGAGCAGACGCAATCC   | ACAGCCTTCTGGTACTCCTCA      | NM_010368.1    |
| TGAGGATCAACAGTGCCCATTA  | GTGACCTCCCTCATGTTCCA       | NM_010368.1    |
| TTCCAGAGCCTGACACCAAC    | CCTTGCCAGACATCAGGATGAA     | NM_173371.3    |
| GGAGATGTACCGTGTGGATCA   | CTGTTCCAGAGGCCATCCAA       | NM_173371.3    |
| TGAAGCACCTCCGGAACC      | CGCGGTATTTCCCAACAC         | NM_008235.2    |
| AGAGGCGAAGGGCAAGAATA    | TCCAGAATGTCTGCCTTCTCTA     | NM_008235.2    |



|                         |                         |                |
|-------------------------|-------------------------|----------------|
| AAGAGCCTGCACCAGGACTA    | GTGCAGGGTCAGGAACTGTAC   | NM_010419.4    |
| TTCTCTGGATGTGGGAAGAC    | GGAGCCTTCGGAAGAAGGTA    | NM_010419.4    |
| TCGACACAGCCTCGATATGAA   | TTCCGGCTCATAACCCATCA    | NM_010431.2    |
| AGTTGCCACTTCCCCACAA     | CTGTGCCTTCATCTCATCTTCAC | NM_010431.2    |
| GTCTCACGGAGGAGCAGAC     | GTCCGTAACAGATCTGCATTCC  | NM_175606.3    |
| GTCTCACGGAGGAGCAGAC     | GTCCGTAACAGATCTGCATTCC  | NM_001159900.1 |
| TCCAAGCATGGGTCTTGTA     | GATGCACTTGTCGCAGTACA    | NM_013822.4    |
| AACGACCCTAATCGCATCGTA   | TCCACCAGCAAAGTGTAGGAC   | NM_013822.4    |
| ACGCCTTTGGAAACCTCTCC    | CAGGCTGTGGAGTCCATCAAA   | NM_010195.2    |
| CTCCAACCTCAGCGTCTTCA    | ATGTAGGAGACTGGCGGGTA    | NM_010195.2    |
| GCTCCACATACTCCCACAAA    | GATGGCAATGTCATGGGGTA    | NM_008377.2    |
| ACTCTGCTGCTTTTGAGGAC    | CAGTGATGGTATGGCTGTCA    | NM_008377.2    |
| AAGGAATGGAATGGCTGGCTA   | ATTGCTCTCGTGCTGAGCTA    | NM_017372.3    |
| GTGACAGTCAGCCAACACAA    | TGGCTGAAGAACTGACCTACA   | NM_017372.3    |
| GCCATGCTGATGTTGACAA     | CTACGATGTCCTCGCTCTCAA   | NM_008629.1    |
| AGGACTCAGTTGGCAGACC     | GCATCACCAGACACTCTTTCAC  | NM_008629.1    |
| GCGATGCTGATGTTGACAA     | TCTCCACAACGTCTTCATTCTCA | NM_054043.3    |
| ATTTGCTCCTAGCTATGGCTACC | CGCTGCCACTGGTCCATA      | NM_054043.3    |
| TCCTCCGTCAACAGCGAATA    | CAATGCGACAGGATAGGGAAC   | NM_010848.3    |
| AAGCGTCACTTGGGGAAAAC    | CGTCTGTTCCGTTCTGTTCC    | NM_010848.3    |
| AGTGCTGCATGAGGAGACA     | TCTCCACAGACACCACATCAA   | NM_010849.4    |
| TTCTTTGGGCGTTGGAAAC     | GGAGTCGTAGTCGAGGTCATA   | NM_001177352.1 |
| GGACGGCGTGAATACCTACA    | GACATTCGTCCACATCCTCTGTA | NM_008714.3    |
| CAAGTGGGACCTGCCTGAA     | GGCACGTTCCAGCATTCTTAC   | NM_008714.3    |
| GCTCAGAGTTGTGGACGAGAA   | TATCTGGGGCACAGAAGGAAAC  | NM_001136075.1 |
| AGTCCGCACTGGAAAAGTGTA   | ACAGATGTGCATTCTCTTGAC   | NM_001136075.1 |
| AGGCACTTCTTGGGCAGAA     | TGTCCACAGACCCAGTGAAT    | NM_001030294.1 |
| CCACCAGCACACGCAAAA      | AGAAGGAGCGCTGATGTTCA    | NM_001030294.1 |
| TGGACTTAGATGTGGAGCAACTT | TTCACCCGACGGCATCTTTA    | NM_011045.2    |
| CAGAGCATGGACTCGTCTCA    | GCAGCGGTATGTGTGCGAA     | NM_011045.2    |
| CTTCCGTTGGCCAGATACA     | GGCTTCGTA CTGCTTTTCCC   | NM_133249.2    |
| GTACAGCCCCGATGACTCC     | TGTCATCCAGGGTCTTCGTA    | NM_133249.2    |
| GTGCCACGGTGTTTGAAAA     | GCTGTGTCCCATAAAGCCAAC   | NM_016802.4    |
| CGGGAGTTGGCCAAAATGAA    | CGCCAATCCTGTTTGCCATA    | NM_016802.4    |
| GAGTCTGGGCTGCTGAGAAA    | ATGGTGTCTCGTGTCTCT      | NM_011314.2    |
| ACCAGGAAGCCAACAGACA     | CAGTATTTGGCAGGCAGTCC    | NM_011314.2    |
| TACATGCACGGTCTGTGCGAA   | TCACAACGCCAGTACAGACA    | NM_001127351.1 |
| TGGATCTTATGCAGCGGGAA    | CCCCAGGTGAAGAAGCCATA    | NM_001127351.1 |
| AGTACCCGCATCTGCACAA     | GTCTCTTCTCGCTCTCGTTCA   | NM_011448.4    |
| CATGAGTGAGGTGCACTCC     | CCCTCTCGCTT CAGATCAAC   | NM_011448.4    |
| AATGCGTCCCCTCTTAGCC     | GAGGGTGGCCATTGGTTCATA   | NM_146214.3    |
| GGAGGTGCTTCTATTACCA     | AGCCACTCGTCAGAATGACA    | NM_146214.3    |
| CAGCTGACGTAGACCCCAA     | GGGCGACAGCGGGTAATA      | NM_009333.3    |
| AGGAGGATTCAGACACCCTA    | TGTGATGGGGAGGGACCATA    | NM_001142918.1 |
| ACTGAGGAACTCCGTTGTCA    | AGGAAGTGCAGGAAGAAGTCA   | NM_009354.1    |
| CTGCAGGAACTGATGTGGAA    | CAGGATCCTCTCCCTCAGAC    | NM_009354.1    |
| CGCTCAGCTATGAACAAGCA    | GACAACCCGTGGCATTTACA    | NM_009521.2    |

TGTCAGCTGCCAAGAGTGTA  
GGTGCAACTGCACAACAAC  
TCAGTTCAGTTCGTTTCC

GATCCAGCCGCACAATCTAC  
GAAAGCCCATGGCACTTACA  
AGCTGCGGTGATTGCAAA

NM\_009521.2  
NM\_009526.3  
NM\_009526.3

| Blast Hits         | Gene Symbol | Gene Aliases     | Gene Full Name        | GO Function        | GO Process             |
|--------------------|-------------|------------------|-----------------------|--------------------|------------------------|
| NM_009704.3        | Areg        | AR Sdgf          | amphiregulin          | cytokine activity  | G-protein coupl        |
| NM_009704.3        | Areg        | AR Sdgf          | amphiregulin          | cytokine activity  | G-protein coupl        |
| NM_008554.3        | Ascl2       | Mash2 bHLHa45    | achaete-scute con     | DNA binding        | E-b cell differentiati |
| NM_008554.3        | Ascl2       | Mash2 bHLHa45    | achaete-scute con     | DNA binding        | E-b cell differentiati |
| NM_007500.4        | Atoh1       | Hath1 Math1 M    | atonal homolog 1      | DNA binding        | chr apoptosis audit    |
| NM_007500.4        | Atoh1       | Hath1 Math1 M    | atonal homolog 1      | DNA binding        | chr apoptosis audit    |
| NM_015732.4        | Axin2       | Axi1 Axil Conduc | axin2                 | GTPase activator   | Wnt receptor sig       |
| NM_015732.4        | Axin2       | Axi1 Axil Conduc | axin2                 | GTPase activator   | Wnt receptor sig       |
| NM_007552.4        | Bmi1        | Bmi-1 Pcgf4 AW   | Bmi1 polycomb ri      | RING-like zinc fin | brain developm         |
| NM_007552.4        | Bmi1        | Bmi-1 Pcgf4 AW   | Bmi1 polycomb ri      | RING-like zinc fin | brain developm         |
| NM_009758.4        | Bmpr1a      | ALK3 Bmpr BMP    | bone morphogenε       | ATP binding SM/    | BMP signaling p        |
| NM_009758.4        | Bmpr1a      | ALK3 Bmpr BMP    | bone morphogenε       | ATP binding SM/    | BMP signaling p        |
| NM_007631.2        | Ccnd1       | cD1 Cyl-1 PRAD   | : cyclin D1           | cyclin-dependent   | G1/S transition        |
| NM_007631.2        | Ccnd1       | cD1 Cyl-1 PRAD   | : cyclin D1           | cyclin-dependent   | G1/S transition        |
| NM_001111099.1 NM_ | Cdkn1a      | P21 CDKI CIP1 S  | cyclin-dependent      | cyclin binding cy  | DNA damage re          |
| NM_001111099.1 NM_ | Cdkn1a      | P21 CDKI CIP1 S  | cyclin-dependent      | cyclin binding cy  | DNA damage re          |
| NM_009880.3        | Cdx1        | Cdx Cdx-1        | caudal type home      | DNA binding seq    | anterior/posteri       |
| NM_009880.3        | Cdx1        | Cdx Cdx-1        | caudal type home      | DNA binding seq    | anterior/posteri       |
| NM_007693.1        | Chga        |                  | chromogranin A        | protein binding    | organelle organ        |
| NM_007693.1        | Chga        |                  | chromogranin A        | protein binding    | organelle organ        |
| NM_001081084.2     | Cubn        | AA408369 AL022   | cubilin (intrinsic fa | calcium ion bindi  | cholesterol met        |
| NM_001081084.2     | Cubn        | AA408369 AL022   | cubilin (intrinsic fa | calcium ion bindi  | cholesterol met        |
| NM_019454.3        | Dll4        | Delta4           | delta-like 4 (Drosc   | Notch binding cε   | Notch signaling        |
| NM_019454.3        | Dll4        | Delta4           | delta-like 4 (Drosc   | Notch binding cε   | Notch signaling        |
| NM_007888.3        | Dvl2        |                  | dishevelled 2, dsh    | identical protein  | Wnt receptor sig       |
| NM_007888.3        | Dvl2        |                  | dishevelled 2, dsh    | identical protein  | Wnt receptor sig       |
| NM_010110.4        | Efnb1       | EpI2 EFL-3 Elk-L | ephrin B1             | ephrin receptor    | axon guidance c        |
| NM_010110.4        | Efnb1       | EpI2 EFL-3 Elk-L | ephrin B1             | ephrin receptor    | axon guidance c        |
| NM_010137.3        | Epas1       | HLF HRF MOP2     | endothelial PAS dε    | DNA binding DN.    | angiogenesis bl        |
| NM_010137.3        | Epas1       | HLF HRF MOP2     | endothelial PAS dε    | DNA binding DN.    | angiogenesis bl        |
| NM_010142.2        | Ephb2       | Drt Erk Nuk Cek  | Eph receptor B2       | ATP binding axo    | axon guidance c        |
| NM_010142.2        | Ephb2       | Drt Erk Nuk Cek  | Eph receptor B2       | ATP binding axo    | axon guidance c        |
| NM_007950.2        | Ereg        | EPR MGC36144     | epiregulin            | epidermal growtl   | anatomical stru        |
| NM_007950.2        | Ereg        | EPR MGC36144     | epiregulin            | epidermal growtl   | anatomical stru        |
| NM_018876.3        | Fut2        |                  | fucosyltransferase    | fucosyltransferas  | carbohydrate m         |
| NM_018876.3        | Fut2        |                  | fucosyltransferase    | fucosyltransferas  | carbohydrate m         |
| NM_008084.2        | Gapdh       | Gapd MGC10254    | glyceraldehyde-3-     | glyceraldehyde-3   | metabolic proce        |
| NM_008084.2        | Gapdh       | Gapd MGC10254    | glyceraldehyde-3-     | glyceraldehyde-3   | metabolic proce        |
| NM_019827.6        | Gsk3b       | GSK3 GSK-3 C86   | glycogen synthase     | ATP binding NF-I   | ER overload res        |
| NM_019827.6        | Gsk3b       | GSK3 GSK-3 C86   | glycogen synthase     | ATP binding NF-I   | ER overload res        |
| NM_010368.1        | Gusb        | g Gur Gus Gut ;  | glucuronidase, bei    | beta-glucuronida   | carbohydrate m         |
| NM_010368.1        | Gusb        | g Gur Gus Gut ;  | glucuronidase, bei    | beta-glucuronida   | carbohydrate m         |
| NM_173371.3        | H6pd        | Gpd1 G6pd1 Gp    | hexose-6-phosphε      | 6-phosphoglucor    | NADP metabolic         |
| NM_173371.3        | H6pd        | Gpd1 G6pd1 Gp    | hexose-6-phosphε      | 6-phosphoglucor    | NADP metabolic         |
| NM_008235.2        | Hes1        | Hry bHLHb39      | hairy and enhance     | DNA binding HLF    | Notch signaling        |
| NM_008235.2        | Hes1        | Hry bHLHb39      | hairy and enhance     | DNA binding HLF    | Notch signaling        |

|                    |          |                                     |                                                      |
|--------------------|----------|-------------------------------------|------------------------------------------------------|
| NM_010419.4        | Hes5     | bHLHb38                             | hairy and enhance DNA binding doi auditory recept    |
| NM_010419.4        | Hes5     | bHLHb38                             | hairy and enhance DNA binding doi auditory recept    |
| NM_010431.2        | Hif1a    | MOP1 bHLHe78 hypoxia inducible      | DNA binding DN. angiogenesis ca                      |
| NM_010431.2        | Hif1a    | MOP1 bHLHe78 hypoxia inducible      | DNA binding DN. angiogenesis ca                      |
| NM_001159901.1 NM_ | Hopx     | Hod Hop Ob1 OHOP homeobox           | DNA binding pro heart developm                       |
| NM_001159901.1 NM_ | Hopx     | Hod Hop Ob1 OHOP homeobox           | DNA binding pro heart developm                       |
| NM_013822.4        | Jag1     | Htu Ozz Ser-1 sljagged 1            | Notch binding ca Notch signaling                     |
| NM_013822.5        | Jag1     | Htu Ozz Ser-1 sljagged 1            | Notch binding ca Notch signaling                     |
| NM_010195.2        | Lgr5     | FEX Gpr49                           | leucine rich repea G-protein couple G-protein coupl  |
| NM_010195.2        | Lgr5     | FEX Gpr49                           | leucine rich repea G-protein couple G-protein coupl  |
| NM_008377.2        | Lrig1    | Img LIG-1 D6Bw                      | leucine-rich repea protein binding                   |
| NM_008377.2        | Lrig1    | Img LIG-1 D6Bw                      | leucine-rich repea protein binding                   |
| NM_017372.3        | Lyz2     | Lys Lzm Lzp Lys lysozyme 2          | catalytic activity cell wall macron                  |
| NM_017372.3        | Lyz2     | Lys Lzm Lzp Lys lysozyme 2          | catalytic activity cell wall macron                  |
| NM_008629.1        | Msi1     | Msi1h Musahi1 Musashi homolog       | RNA binding nuc response to hor                      |
| NM_008629.1        | Msi1     | Msi1h Musahi1 Musashi homolog       | RNA binding nuc response to hor                      |
| NM_054043.3        | Msi2     | Msi2h AI451722 Musashi homolog      | RNA binding nuc stem cell develc                     |
| NM_054043.3        | Msi2     | Msi2h AI451722 Musashi homolog      | RNA binding nuc stem cell develc                     |
| NM_010848.3        | Myb      | c-myb M16449 myeloblastosis on      | DNA binding seq G1/S transition                      |
| NM_001198914.1 NM_ | Myb      | c-myb M16449 myeloblastosis on      | DNA binding seq G1/S transition                      |
| NM_001177354.1 NM_ | Myc      | Myc2 Nird Niarc myelocytomatosis    | DNA binding DN. B cell apoptosis                     |
| NM_010849.4        | Myc      | Myc2 Nird Niarc myelocytomatosis    | DNA binding DN. B cell apoptosis                     |
| NM_008714.3        | Notch1   | Mis6 Tan1 lin-12 Notch gene homo    | calcium ion bindi Notch signaling                    |
| NM_008714.3        | Notch1   | Mis6 Tan1 lin-12 Notch gene homo    | calcium ion bindi Notch signaling                    |
| NM_010949.1 NM_001 | Numb     | mnbl m-numb                         | numb gene homol alpha-catenin bir adherens juncti    |
| NM_010949.1 NM_001 | Numb     | mnbl m-numb                         | numb gene homol alpha-catenin bir adherens juncti    |
| NM_001030294.1     | Olfm4    | GC1 OlfD pPD4 olfactomedin 4        | molecular_functi biological_proce                    |
| NM_001030294.1     | Olfm4    | GC1 OlfD pPD4 olfactomedin 4        | molecular_functi biological_proce                    |
| NM_011045.2        | Pcna     |                                     | proliferating cell n DNA binding DN. DNA replication |
| NM_011045.2        | Pcna     |                                     | proliferating cell n DNA binding DN. DNA replication |
| NM_133249.2        | Ppargc1b | Perc 4631412G2 peroxisome prolifi   | AF-2 domain bin estrogen recept                      |
| NM_133249.2        | Ppargc1b | Perc 4631412G2 peroxisome prolifi   | AF-2 domain bin estrogen recept                      |
| NM_016802.4        | Rhoa     | Arha Arha1 Arha ras homolog gene    | GTP binding GTP GTP catabolic pi                     |
| NM_016802.4        | Rhoa     | Arha Arha1 Arha ras homolog gene    | GTP binding GTP GTP catabolic pi                     |
| NM_011314.2        | Saa2     | Saa1 Saa-2 AW1 serum amyloid A 2    | protein binding                                      |
| NM_011314.2        | Saa2     | Saa1 Saa-2 AW1 serum amyloid A 2    | protein binding                                      |
| NM_001177804.1 NM_ | Sirt3    | Sir2I3 AI848213 sirtuin 3 (silent m | NAD binding NAI chromatin silen                      |
| NM_001177804.1 NM_ | Sirt3    | Sir2I3 AI848213 sirtuin 3 (silent m | NAD binding NAI chromatin silen                      |
| NM_011448.4        | Sox9     | AV220920 KIAA4 SRY-box containin    | DNA binding pro Sertoli cell deve                    |
| NM_011448.4        | Sox9     | AV220920 KIAA4 SRY-box containin    | DNA binding pro Sertoli cell deve                    |
| NM_146214.3        | Tat      | MGC37772 MGC tyrosine aminotra      | 1-aminocyclopro 2-oxoglutarate r                     |
| NM_146214.3        | Tat      | MGC37772 MGC tyrosine aminotra      | 1-aminocyclopro 2-oxoglutarate r                     |
| NM_001142924.1 NM_ | Tcf7l2   | Tcf4 TCF4B TCF4 transcription factc | DNA binding RN, Wnt receptor sij                     |
| NM_001142924.1 NM_ | Tcf7l2   | Tcf4 TCF4B TCF4 transcription factc | DNA binding RN, Wnt receptor sij                     |
| NM_009354.1        | Tert     | TR TP2 TRT EST. telomerase revers   | DNA binding RN, DNA strand elor                      |
| NM_009354.1        | Tert     | TR TP2 TRT EST. telomerase revers   | DNA binding RN, DNA strand elor                      |
| NM_009521.2        | Wnt3     | Int-4 Wnt-3                         | wingless-related N frizzled binding f Spemann organ  |

|             |      |                 |                                                       |
|-------------|------|-----------------|-------------------------------------------------------|
| NM_009521.2 | Wnt3 | Int-4   Wnt-3   | wingless-related 1 frizzled binding   f Spemann organ |
| NM_009526.3 | Wnt6 | Wnt-6   AA40927 | (wingless-related 1 G-protein-couple Wnt receptor si  |
| NM_009526.3 | Wnt6 | Wnt-6   AA40927 | (wingless-related 1 G-protein-couple Wnt receptor si  |



## GO Component

cell surface | cytoplasm | extracellular space | integral to membrane | intracellular | membrane | nucleus

cell surface | cytoplasm | extracellular space | integral to membrane | intracellular | membrane | nucleus

cytoplasm | nucleus | nucleus

cytoplasm | nucleus | nucleus

nucleus

nucleus

Axin-APC-beta-catenin-GSK3B complex | cell cortex | centrosome | centrosome | cytoplasm | cytoplasmic membran

Axin-APC-beta-catenin-GSK3B complex | cell cortex | centrosome | centrosome | cytoplasm | cytoplasmic membran

PcG protein complex | cytoplasm | nuclear body | nucleolus | nucleus | ubiquitin ligase complex | ubiquitin ligase cor

PcG protein complex | cytoplasm | nuclear body | nucleolus | nucleus | ubiquitin ligase complex | ubiquitin ligase cor

integral to membrane | membrane | plasma membrane

integral to membrane | membrane | plasma membrane

cyclin-dependent protein kinase holoenzyme complex | cyclin-dependent protein kinase holoenzyme complex | c

cyclin-dependent protein kinase holoenzyme complex | cyclin-dependent protein kinase holoenzyme complex | c

PCNA-p21 complex | cyclin-dependent protein kinase holoenzyme complex | cyclin-dependent protein kinase hol

PCNA-p21 complex | cyclin-dependent protein kinase holoenzyme complex | cyclin-dependent protein kinase hol

nucleus

nucleus

extracellular region | extracellular space

extracellular region | extracellular space

Golgi apparatus | apical part of cell | apical plasma membrane | brush border | brush border membrane | coated pit

Golgi apparatus | apical part of cell | apical plasma membrane | brush border | brush border membrane | coated pit

integral to membrane | integral to plasma membrane | membrane

integral to membrane | integral to plasma membrane | membrane

apical part of cell | cell cortex | clathrin-coated vesicle | cytoplasm | cytoplasm | cytoplasmic part | cytoskeleton | intr

apical part of cell | cell cortex | clathrin-coated vesicle | cytoplasm | cytoplasm | cytoplasmic part | cytoskeleton | intr

integral to membrane | membrane | membrane raft | synapse

integral to membrane | membrane | membrane raft | synapse

cytoplasm | cytoplasm | nucleus | nucleus | transcription factor complex | transcription factor complex

cytoplasm | cytoplasm | nucleus | nucleus | transcription factor complex | transcription factor complex

integral to membrane | integral to plasma membrane | membrane | neuronal cell body | synapse

integral to membrane | integral to plasma membrane | membrane | neuronal cell body | synapse

extracellular region | extracellular space | extracellular space | integral to membrane | membrane | plasma membra

extracellular region | extracellular space | extracellular space | integral to membrane | membrane | plasma membra

Golgi apparatus | integral to membrane | membrane

Golgi apparatus | integral to membrane | membrane

cytoplasm | mitochondrion

cytoplasm | mitochondrion

Axin-APC-beta-catenin-GSK3B complex | Axin-APC-beta-catenin-GSK3B complex | beta-catenin destruction comp

Axin-APC-beta-catenin-GSK3B complex | Axin-APC-beta-catenin-GSK3B complex | beta-catenin destruction comp

endoplasmic reticulum | lysosome | lysosome | microsome | soluble fraction

endoplasmic reticulum | lysosome | lysosome | microsome | soluble fraction

endoplasmic reticulum | microsome | microsome

endoplasmic reticulum | microsome | microsome

cytoplasm | nucleus | protein complex

cytoplasm | nucleus | protein complex

nucleus

nucleus

cytoplasm | microtubule-based flagellum | nucleolus | nucleus | nucleus | transcription factor complex

cytoplasm | microtubule-based flagellum | nucleolus | nucleus | nucleus | transcription factor complex

cytoplasm | nucleus | nucleus

cytoplasm | nucleus | nucleus

integral to membrane | membrane | plasma membrane | plasma membrane

integral to membrane | membrane | plasma membrane | plasma membrane

integral to membrane | membrane | plasma membrane

integral to membrane | membrane | plasma membrane

integral to membrane | membrane

integral to membrane | membrane

Golgi cis cisterna | Golgi stack | cytoplasm | endoplasmic reticulum lumen | extracellular region | microvillus | rough

Golgi cis cisterna | Golgi stack | cytoplasm | endoplasmic reticulum lumen | extracellular region | microvillus | rough

cytoplasm | nucleus | polysome

cytoplasm | nucleus | polysome

cytoplasm | polysome

cytoplasm | polysome

nucleus

nucleus

axon | cytoplasm | nuclear body | nucleolus | nucleoplasm | nucleus | nucleus | spindle

axon | cytoplasm | nuclear body | nucleolus | nucleoplasm | nucleus | nucleus | spindle

Golgi apparatus | acrosomal vesicle | cytoplasm | integral to membrane | integral to plasma membrane | membrane

Golgi apparatus | acrosomal vesicle | cytoplasm | integral to membrane | integral to plasma membrane | membrane

apical part of cell | apical part of cell | apical plasma membrane | basolateral plasma membrane | cytoplasm | early

apical part of cell | apical part of cell | apical plasma membrane | basolateral plasma membrane | cytoplasm | early

extracellular region | extracellular space

extracellular region | extracellular space

PCNA complex | PCNA-p21 complex | cyclin-dependent protein kinase holoenzyme complex | cytoplasm | microtubule

PCNA complex | PCNA-p21 complex | cyclin-dependent protein kinase holoenzyme complex | cytoplasm | microtubule

mediator complex | nucleus

mediator complex | nucleus

axon | cytoplasm | cytoskeleton | cytosol | cytosol | intracellular | membrane | membrane fraction | mitochondrion | nucleus

axon | cytoplasm | cytoskeleton | cytosol | cytosol | intracellular | membrane | membrane fraction | mitochondrion | nucleus

cytoplasm | membrane | mitochondrion | mitochondrion

cytoplasm | membrane | mitochondrion | mitochondrion

nucleus | nucleus

nucleus | nucleus

mitochondrion | mitochondrion

mitochondrion | mitochondrion

beta-catenin-TCF7L2 complex | cytosol | nucleoplasm | nucleus | nucleus | protein-DNA complex | transcription factor

beta-catenin-TCF7L2 complex | cytosol | nucleoplasm | nucleus | nucleus | protein-DNA complex | transcription factor

chromosome, telomeric region | cytoplasm | nucleoplasm | nucleus | ribonucleoprotein complex | telomerase holoenzyme

chromosome, telomeric region | cytoplasm | nucleoplasm | nucleus | ribonucleoprotein complex | telomerase holoenzyme

cytoplasm | early endosome | extracellular matrix | extracellular region | extracellular space | late endosome | membrane

cytoplasm | early endosome | extracellular matrix | extracellular region | extracellular space | late endosome | meml  
cell surface | extracellular matrix | extracellular region | extracellular space | plasma membrane | proteinaceous ext  
cell surface | extracellular matrix | extracellular region | extracellular space | plasma membrane | proteinaceous ext

ie-bound vesicle | cytoplasmic microtubule | intracellular | nucleus | plasma membrane | postsynaptic density | pre  
ie-bound vesicle | cytoplasmic microtubule | intracellular | nucleus | plasma membrane | postsynaptic density | pre  
nplex  
nplex

cytoplasm | cytosol | cytosol | intracellular | nucleoplasm | nucleoplasm | nucleus | nucleus  
cytoplasm | cytosol | cytosol | intracellular | nucleoplasm | nucleoplasm | nucleus | nucleus  
loenzyme complex | cytoplasm | cytosol | cytosol | nucleoplasm | nucleus | nucleus  
loenzyme complex | cytoplasm | cytosol | cytosol | nucleoplasm | nucleus | nucleus

t | cytoplasm | endocytic vesicle | endocytic vesicle membrane | endoplasmic reticulum | endosome | lysosomal lumen  
t | cytoplasm | endocytic vesicle | endocytic vesicle membrane | endoplasmic reticulum | endosome | lysosomal lumen

acellular | nucleus | plasma membrane | plasma membrane | soluble fraction  
acellular | nucleus | plasma membrane | plasma membrane | soluble fraction

ane  
ane

lex | cytoplasm | cytosol | cytosol | dendritic shaft | dendritic spine | growth cone | membrane raft | membrane-bound  
lex | cytoplasm | cytosol | cytosol | dendritic shaft | dendritic spine | growth cone | membrane raft | membrane-bound

endoplasmic reticulum lumen | soluble fraction | stored secretory granule | trans-Golgi network transport vesicle  
endoplasmic reticulum lumen | soluble fraction | stored secretory granule | trans-Golgi network transport vesicle

e | nucleus | nucleus | plasma membrane | plasma membrane  
e | nucleus | nucleus | plasma membrane | plasma membrane  
endosome | extrinsic to plasma membrane | membrane | nucleus | plasma membrane  
endosome | extrinsic to plasma membrane | membrane | nucleus | plasma membrane

ule cytoskeleton | nuclear lamina | nuclear replication fork | nucleoplasm | nucleus | nucleus | nucleus | replication fo  
ule cytoskeleton | nuclear lamina | nuclear replication fork | nucleoplasm | nucleus | nucleus | nucleus | replication fo

ucleus | plasma membrane | plasma membrane | soluble fraction  
ucleus | plasma membrane | plasma membrane | soluble fraction

or complex  
or complex  
enzyme complex  
enzyme complex  
brane fraction | membrane raft | plasma membrane | proteinaceous extracellular matrix



brane fraction | membrane raft | plasma membrane | proteinaceous extracellular matrix  
:racellular matrix  
:racellular matrix

rotein complex  
rotein complex

en | lysosome | membrane | membrane fraction | plasma membrane | protein complex  
en | lysosome | membrane | membrane fraction | plasma membrane | protein complex

led organelle | neuronal cell body | nucleoplasm | nucleus | nucleus | protein complex | soluble fraction | soluble fract  
led organelle | neuronal cell body | nucleoplasm | nucleus | nucleus | protein complex | soluble fraction | soluble fract

ork  
ork

.ion  
.ion

## Primer Sequences Used for Single-Cell Gene Expression Analysis

| <b>Cell Type</b>  | <b>n (cells)</b> | <b>n (mice)</b> |
|-------------------|------------------|-----------------|
| Hopx-Tomato       | 91               | 3               |
| ST-LRC Kit-       | 47               | 3               |
| ST-LRC Kit+       | 48               | 3               |
| LT-LRC (1 month)  | 95               | 3               |
| LT-LRC (3 months) | 91               | 3               |
| Bmi1-Tomato       | 93               | 3               |
| Lgr5-eGFP         | 62               | 3               |
| Lgr5-CreERT2      | 31               | 3               |

| sampleID | Group | Areg_A01 | Areg_A13 | Ascl2_A25 |
|----------|-------|----------|----------|-----------|
| S01      | HopX  |          | 30       | 30        |
| S02      | HopX  |          | 30       | 16.7997   |
| S03      | HopX  |          | 30       | 19.0883   |
| S04      | HopX  |          | 30       | 30        |
| S13      | HopX  |          | 30       | 26.7108   |
| S14      | HopX  | 25.4854  | 30       | 26.7492   |
| S15      | HopX  |          | 30       | 30        |
| S16      | HopX  |          | 30       | 20.0677   |
| S25      | HopX  |          | 30       | 30        |
| S26      | HopX  |          | 30       | 19.3615   |
| S27      | HopX  |          | 30       | 30        |
| S28      | HopX  |          | 30       | 23.9961   |
| S37      | HopX  |          | 30       | 30        |
| S38      | HopX  |          | 30       | 18.3324   |
| S39      | HopX  |          | 30       | 18.8597   |
| S40      | HopX  |          | 30       | 30        |
| S49      | HopX  |          | 30       | 30        |
| S50      | HopX  |          | 30       | 17.5337   |
| S51      | HopX  |          | 30       | 30        |
| S52      | HopX  |          | 30       | 30        |
| S61      | HopX  |          | 30       | 30        |
| S62      | HopX  |          | 30       | 30        |
| S63      | HopX  |          | 30       | 30        |
| S64      | HopX  |          | 30       | 18.3344   |
| S73      | HopX  |          | 30       | 17.9892   |
| S74      | HopX  |          | 30       | 18.8584   |
| S75      | HopX  |          | 30       | 25.698    |
| S76      | HopX  |          | 30       | 30        |
| S85      | HopX  |          | 30       | 30        |
| S86      | HopX  |          | 30       | 30        |
| S87      | HopX  |          | 30       | 30        |
| S88      | HopX  |          | 30       | 30        |
| S01      | HopX  |          | 30       | 30        |
| S02      | HopX  |          | 30       | 30        |
| S03      | HopX  |          | 30       | 30        |
| S04      | HopX  | 28.8945  | 18.8441  | 30        |
| S13      | HopX  |          | 30       | 19.5636   |
| S14      | HopX  |          | 30       | 30        |
| S15      | HopX  |          | 30       | 30        |
| S16      | HopX  |          | 30       | 19.6626   |



|     |      |         |         |         |
|-----|------|---------|---------|---------|
| S25 | HopX | 30      | 27.2143 | 30      |
| S26 | HopX | 30      | 30      | 30      |
| S27 | HopX | 30      | 19.6808 | 30      |
| S28 | HopX | 30      | 30      | 30      |
| S37 | HopX | 30      | 18.683  | 30      |
| S38 | HopX | 30      | 30      | 30      |
| S39 | HopX | 28.7492 | 17.0072 | 30      |
| S40 | HopX | 30      | 30      | 30      |
| S49 | HopX | 30      | 30      | 30      |
| S50 | HopX | 30      | 30      | 30      |
| S51 | HopX | 30      | 30      | 30      |
| S52 | HopX | 30      | 30      | 30      |
| S61 | HopX | 28.2522 | 19.4857 | 30      |
| S62 | HopX | 30      | 30      | 30      |
| S63 | HopX | 30      | 30      | 30      |
| S64 | HopX | 30      | 30      | 30      |
| S73 | HopX | 27.8499 | 19.5638 | 30      |
| S74 | HopX | 30      | 30      | 30      |
| S75 | HopX | 30      | 19.425  | 30      |
| S76 | HopX | 30      | 30      | 18.3568 |
| S85 | HopX | 30      | 30      | 30      |
| S86 | HopX | 25.9688 | 16.4677 | 30      |
| S87 | HopX | 30      | 19.2232 | 30      |
| S88 | HopX | 30      | 30      | 30      |
| S05 | HopX | 30      | 30      | 30      |
| S06 | HopX | 30      | 30      | 19.5739 |
| S07 | HopX | 30      | 19.6048 | 30      |
| S08 | HopX | 30      | 27.7252 | 30      |
| S18 | HopX | 30      | 19.1026 | 24.7504 |
| S19 | HopX | 30      | 30      | 30      |
| S20 | HopX | 30      | 30      | 30      |
| S29 | HopX | 30      | 30      | 30      |
| S30 | HopX | 30      | 30      | 30      |
| S31 | HopX | 30      | 30      | 30      |
| S32 | HopX | 30      | 30      | 30      |
| S41 | HopX | 30      | 30      | 30      |
| S42 | HopX | 28.1182 | 14.8627 | 30      |
| S43 | HopX | 30      | 24.8859 | 20.1623 |
| S44 | HopX | 30      | 30      | 28.6028 |
| S55 | HopX | 30      | 27.2676 | 30      |
| S56 | HopX | 30      | 30      | 25.624  |

|     |      |    |         |         |
|-----|------|----|---------|---------|
| S66 | HopX | 30 | 19.6066 | 30      |
| S67 | HopX | 30 | 30      | 30      |
| S68 | HopX | 30 | 30      | 30      |
| S77 | HopX | 30 | 30      | 18.8769 |
| S78 | HopX | 30 | 30      | 15.0511 |
| S79 | HopX | 30 | 30      | 30      |
| S89 | HopX | 30 | 30      | 30      |
| S90 | HopX | 30 | 30      | 30      |
| S91 | HopX | 30 | 17.6216 | 30      |
| S92 | HopX | 30 | 16.8058 | 30      |

| <b>Ascl2_A37</b> | <b>Atoh1_A49</b> | <b>Atoh1_A61</b> |
|------------------|------------------|------------------|
| 30               | 16.5972          | 16.1873          |
| 30               | 17.2412          | 17.3607          |
| 30               | 30               | 30               |
| 30               | 20.9517          | 30               |
| 30               | 16.8576          | 17.8484          |
| 30               | 17.3296          | 16.4573          |
| 30               | 17.4552          | 30               |
| 30               | 19.463           | 18.7927          |
| 30               | 16.167           | 16.8538          |
| 30               | 19.374           | 16.8315          |
| 30               | 18.8551          | 18.2037          |
| 30               | 20.3596          | 30               |
| 30               | 17.4058          | 19.2756          |
| 30               | 16.5336          | 17.3123          |
| 30               | 18.1965          | 30               |
| 30               | 18.0803          | 17.1186          |
| 30               | 18.0451          | 17.8809          |
| 30               | 18.0746          | 30               |
| 30               | 20.8977          | 21.1256          |
| 30               | 18.404           | 17.0546          |
| 30               | 17.3633          | 18.9652          |
| 30               | 22.7735          | 21.7745          |
| 30               | 17.3528          | 22.0529          |
| 30               | 17.8614          | 20.2001          |
| 30               | 20.6444          | 26.1915          |
| 30               | 30               | 30               |
| 30               | 18.294           | 17.8708          |
| 30               | 18.1987          | 17.7056          |
| 30               | 17.3548          | 17.8344          |
| 30               | 30               | 30               |
| 30               | 24.6767          | 22.0463          |
| 30               | 30               | 30               |
| 30               | 18.5966          | 17.071           |
| 30               | 30               | 25.5631          |
| 30               | 18.0202          | 18.3396          |
| 30               | 18.446           | 18.7905          |
| 30               | 18.6451          | 18.9265          |
| 30               | 20.3429          | 19.1756          |
| 30               | 30               | 30               |
| 30               | 17.5837          | 17.3328          |

|    |         |         |
|----|---------|---------|
| 30 | 16.2069 | 16.0962 |
| 30 | 17.2821 | 17.6768 |
| 30 | 17.3025 | 18.6382 |
| 30 | 17.3271 | 25.1264 |
| 30 | 17.6742 | 17.4842 |
| 30 | 30      | 30      |
| 30 | 18.1735 | 30      |
| 30 | 20.6186 | 26.2523 |
| 30 | 17.3498 | 17.5146 |
| 30 | 18.5282 | 18.8359 |
| 30 | 17.777  | 30      |
| 30 | 17.6744 | 18.6047 |
| 30 | 30      | 30      |
| 30 | 16.7577 | 15.7605 |
| 30 | 26.6345 | 30      |
| 30 | 16.3142 | 17.1621 |
| 30 | 18.2312 | 18.0836 |
| 30 | 16.9686 | 17.9268 |
| 30 | 17.4997 | 16.9598 |
| 30 | 17.4473 | 17.7695 |
| 30 | 16.9966 | 17.0213 |
| 30 | 22.2039 | 30      |
| 30 | 16.8543 | 16.1718 |
| 30 | 19.1421 | 18.9289 |
| 30 | 30      | 17.1816 |
| 30 | 18.4764 | 17.7534 |
| 30 | 16.3631 | 17.3488 |
| 30 | 14.41   | 13.2411 |
| 30 | 17.4239 | 18.7313 |
| 30 | 17.0986 | 17.1761 |
| 30 | 18.1488 | 20.1522 |
| 30 | 20.4206 | 30      |
| 30 | 25.0939 | 30      |
| 30 | 26.0129 | 30      |
| 30 | 17.4882 | 16.3617 |
| 30 | 17.3377 | 17.4828 |
| 30 | 21.2195 | 30      |
| 30 | 15.9146 | 17.9748 |
| 30 | 17.3624 | 18.9185 |
| 30 | 14.7451 | 15.9523 |
| 30 | 18.329  | 19.0399 |

|        |         |         |
|--------|---------|---------|
| 30     | 17.0611 | 18.6489 |
| 30     | 17.3116 | 17.6871 |
| 30     | 17.5631 | 19.9065 |
| 30     | 30      | 30      |
| 16.474 | 21.5123 | 30      |
| 30     | 21.3542 | 21.3754 |
| 30     | 17.5734 | 17.9684 |
| 30     | 12.5916 | 12.4428 |
| 30     | 30      | 26.7491 |
| 30     | 18.6852 | 24.5409 |

**Axin2\_A73****Axin2\_A85****Bmi1\_A02**

|         |         |         |
|---------|---------|---------|
| 30      | 30      | 16.4582 |
| 30      | 30      | 16.0627 |
| 16.3572 | 18.5135 | 18.3716 |
| 30      | 30      | 16.8502 |
| 26.5197 | 30      | 16.5985 |
| 30      | 30      | 18.0168 |
| 30      | 30      | 16.6652 |
| 30      | 18.9726 | 14.2702 |
| 30      | 30      | 17.8311 |
| 15.849  | 18.9574 | 15.9192 |
| 30      | 26.4458 | 16.7252 |
| 30      | 30      | 17.4094 |
| 14.3069 | 16.5345 | 16.8203 |
| 30      | 30      | 16.4799 |
| 16.9409 | 30      | 16.7362 |
| 16.835  | 30      | 30      |
| 30      | 30      | 17.7088 |
| 15.0825 | 17.7905 | 16.7057 |
| 18.1438 | 18.4142 | 18.5308 |
| 30      | 30      | 15.2029 |
| 30      | 30      | 17.8291 |
| 18.1263 | 30      | 18.0814 |
| 30      | 30      | 17.532  |
| 16.7892 | 17.9163 | 15.1268 |
| 30      | 30      | 18.9568 |
| 14.6551 | 17.1056 | 15.4574 |
| 12.9608 | 15.452  | 30      |
| 30      | 30      | 16.3134 |
| 22.5904 | 25.8943 | 20.6482 |
| 17.0079 | 18.7214 | 16.1654 |
| 30      | 30      | 18.8097 |
| 18.1451 | 30      | 16.154  |
| 30      | 30      | 17.7144 |
| 15.5627 | 18.9098 | 16.3792 |
| 30      | 30      | 30      |
| 18.1396 | 25.0696 | 18.0722 |
| 30      | 30      | 21.3576 |
| 30      | 30      | 17.1748 |
| 30      | 30      | 25.312  |
| 14.7557 | 17.5712 | 16.614  |

|         |         |         |
|---------|---------|---------|
| 26.5281 | 30      | 17.8139 |
| 30      | 30      | 30      |
| 30      | 30      | 18.1103 |
| 30      | 30      | 16.5175 |
| 30      | 30      | 16.3318 |
| 30      | 24.97   | 17.2137 |
| 30      | 30      | 17.3263 |
| 18.0243 | 21.0564 | 16.0869 |
| 30      | 30      | 16.5776 |
| 16.1135 | 18.4644 | 17.924  |
| 30      | 30      | 17.516  |
| 30      | 30      | 16.6868 |
| 17.1272 | 20.5676 | 16.1723 |
| 30      | 30      | 16.5584 |
| 30      | 30      | 19.516  |
| 30      | 30      | 16.6471 |
| 30      | 30      | 15.821  |
| 17.6315 | 30      | 17.625  |
| 30      | 30      | 16.8172 |
| 30      | 30      | 15.5898 |
| 30      | 30      | 30      |
| 14.7276 | 18.9349 | 16.3849 |
| 30      | 30      | 16.0584 |
| 30      | 30      | 16.7977 |
| 17.5337 | 19.0894 | 19.4236 |
| 30      | 18.2718 | 17.3206 |
| 30      | 30      | 17.6581 |
| 18.5695 | 22.3872 | 17.2671 |
| 13.42   | 14.3696 | 15.342  |
| 17.9619 | 22.485  | 30      |
| 30      | 30      | 21.3121 |
| 19.2429 | 19.2196 | 16.1604 |
| 15.5383 | 17.1981 | 15.7909 |
| 30      | 30      | 30      |
| 18.2075 | 30      | 18.5743 |
| 30      | 30      | 16.8699 |
| 13.0844 | 13.9758 | 17.2606 |
| 26.8756 | 30      | 15.9801 |
| 16.3908 | 18.4057 | 17.6769 |
| 30      | 30      | 17.946  |
| 16.3482 | 17.6216 | 16.0633 |

|         |         |         |
|---------|---------|---------|
| 15.7142 | 23.865  | 16.2012 |
| 18.7653 | 20.6643 | 22.2853 |
| 30      | 27.4957 | 20.213  |
| 13.3488 | 15.2238 | 15.4443 |
| 12.4852 | 13.9565 | 16.8025 |
| 16.2267 | 18.1909 | 17.8742 |
| 30      | 30      | 17.7906 |
| 14.9608 | 17.6946 | 16.9818 |
| 15.0886 | 18.7753 | 22.2629 |
| 30      | 30      | 18.288  |



**Bmi1\_A14****Bmpr1a\_A26****Bmpr1a\_A38**

|         |         |         |
|---------|---------|---------|
| 18.8571 | 18.3848 | 17.153  |
| 16.3228 | 14.8245 | 14.92   |
| 18.1198 | 15.6063 | 15.6749 |
| 16.3922 | 14.4402 | 16.2885 |
| 17.4103 | 17.3392 | 15.6938 |
| 17.8581 | 17.3172 | 17.8763 |
| 17.1423 | 30      | 16.3375 |
| 14.2384 | 16.4772 | 30      |
| 17.1881 | 16.3708 | 17.844  |
| 17.3384 | 17.1191 | 16.123  |
| 14.756  | 16.1742 | 16.2501 |
| 17.2706 | 16.0481 | 17.1199 |
| 16.2152 | 13.7084 | 14.208  |
| 15.8161 | 17.473  | 16.9288 |
| 16.5542 | 16.7874 | 17.0104 |
| 19.0927 | 30      | 30      |
| 17.0539 | 16.0106 | 16.315  |
| 15.8639 | 15.2926 | 15.2239 |
| 15.1878 | 14.8197 | 15.595  |
| 15.8077 | 17.1564 | 18.8847 |
| 30      | 18.8921 | 14.9472 |
| 16.6784 | 17.2147 | 15.0719 |
| 15.9412 | 30      | 30      |
| 14.7957 | 12.9408 | 14.4217 |
| 15.6053 | 13.7273 | 14.8653 |
| 15.7636 | 14.9045 | 15.4275 |
| 30      | 12.7114 | 13.9835 |
| 14.0683 | 13.521  | 14.1932 |
| 21.7438 | 25.3405 | 24.1317 |
| 15.1795 | 14.5043 | 15.2539 |
| 16.4654 | 16.6774 | 17.138  |
| 15.9768 | 14.3716 | 16.254  |
| 24.3515 | 18.5064 | 17.6697 |
| 18.5967 | 14.2629 | 15.4658 |
| 20.6673 | 18.5668 | 17.2006 |
| 18.1669 | 17.4814 | 16.1401 |
| 17.8129 | 15.9258 | 15.673  |
| 16.3474 | 14.8495 | 14.9176 |
| 18.6783 | 16.9862 | 16.8861 |
| 16.1404 | 14.1089 | 13.9685 |

|         |         |         |
|---------|---------|---------|
| 16.0813 | 30      | 18.4701 |
| 19.2359 | 14.1931 | 14.5238 |
| 17.6158 | 30      | 17.7813 |
| 17.336  | 17.391  | 15.5751 |
| 16.8871 | 13.5944 | 13.8802 |
| 17.8227 | 30      | 18.7242 |
| 18.495  | 16.976  | 17.6864 |
| 16.6432 | 14.3003 | 14.9079 |
| 19.7388 | 30      | 17.588  |
| 15.8437 | 13.7091 | 14.0204 |
| 17.8458 | 30      | 30      |
| 16.814  | 30      | 16.6798 |
| 18.1028 | 13.7273 | 14.9029 |
| 18.8762 | 30      | 18.3676 |
| 16.4599 | 16.5642 | 30      |
| 16.175  | 17.9946 | 16.2942 |
| 21.0555 | 17.1768 | 16.8275 |
| 18.2876 | 16.3014 | 15.3308 |
| 15.5729 | 26.3747 | 19.161  |
| 15.2875 | 17.3392 | 16.8835 |
| 30      | 18.4388 | 30      |
| 15.258  | 16.5303 | 16.5908 |
| 16.3654 | 14.3747 | 14.4728 |
| 16.4342 | 13.9801 | 14.741  |
| 19.8744 | 30      | 16.8828 |
| 16.387  | 17.7352 | 15.5995 |
| 16.6474 | 18.6835 | 15.8981 |
| 17.6815 | 17.0885 | 16.9252 |
| 14.7154 | 13.5378 | 13.7586 |
| 18.6498 | 16.9509 | 15.8083 |
| 16.5086 | 15.7602 | 15.4621 |
| 15.5858 | 13.6239 | 16.8549 |
| 13.7882 | 14.0055 | 14.917  |
| 30      | 30      | 18.2745 |
| 17.6218 | 16.5995 | 30      |
| 16.9739 | 30      | 30      |
| 15.6808 | 14.6276 | 14.4166 |
| 15.6943 | 16.1529 | 16.0153 |
| 17.0769 | 17.3428 | 16.9695 |
| 16.6756 | 16.5201 | 15.9504 |
| 15.2344 | 16.4911 | 18.5376 |

|         |         |         |
|---------|---------|---------|
| 15.4154 | 16.5998 | 21.3537 |
| 16.1456 | 14.2504 | 14.3615 |
| 15.7578 | 30      | 17.033  |
| 14.8472 | 15.086  | 16.0648 |
| 16.3669 | 15.1306 | 15.6917 |
| 17.8633 | 17.0337 | 16.4563 |
| 17.6813 | 30      | 16.5376 |
| 15.8484 | 13.7575 | 13.702  |
| 16.7621 | 15.5733 | 16.0552 |
| 17.4637 | 18.5966 | 18.6273 |

Ccnd1\_A50

Ccnd1\_A62

Cdkn1a\_A74

|    |  |         |         |
|----|--|---------|---------|
| 30 |  | 30      | 15.662  |
| 30 |  | 30      | 15.1696 |
| 30 |  | 30      | 14.1747 |
| 30 |  | 30      | 15.3872 |
| 30 |  | 25.3459 | 15.0552 |
| 30 |  | 30      | 17.668  |
| 30 |  | 30      | 14.4647 |
| 30 |  | 30      | 13.5316 |
| 30 |  | 30      | 15.6578 |
| 30 |  | 22.9872 | 14.534  |
| 30 |  | 30      | 13.4581 |
| 30 |  | 30      | 15.0664 |
| 30 |  | 25.6212 | 13.8353 |
| 30 |  | 30      | 14.6528 |
| 30 |  | 24.3778 | 14.2091 |
| 30 |  | 28.0698 | 17.3747 |
| 30 |  | 25.6645 | 14.128  |
| 30 |  | 22.5851 | 13.798  |
| 30 |  | 30      | 14.79   |
| 30 |  | 26.6683 | 13.9913 |
| 30 |  | 30      | 16.2215 |
| 30 |  | 30      | 14.3982 |
| 30 |  | 30      | 15.1814 |
| 30 |  | 30      | 14.7355 |
| 30 |  | 28.7338 | 15.431  |
| 30 |  | 30      | 14.5545 |
| 30 |  | 30      | 14.0712 |
| 30 |  | 30      | 15.7719 |
| 30 |  | 30      | 18.8463 |
| 30 |  | 30      | 14.3827 |
| 30 |  | 30      | 16.0354 |
| 30 |  | 30      | 15.6247 |
| 30 |  | 30      | 15.1939 |
| 30 |  | 26.6496 | 14.5254 |
| 30 |  | 30      | 16.4436 |
| 30 |  | 20.9807 | 15.0363 |
| 30 |  | 30      | 16.2574 |
| 30 |  | 24.1497 | 14.4257 |
| 30 |  | 30      | 14.9267 |
| 30 |  | 24.9943 | 13.9775 |

|         |         |         |
|---------|---------|---------|
| 30      | 30      | 16.6322 |
| 30      | 30      | 14.2667 |
| 30      | 22.3106 | 15.5373 |
| 30      | 30      | 14.4411 |
| 30      | 26.5562 | 14.2569 |
| 30      | 30      | 13.1894 |
| 30      | 22.6821 | 17.3313 |
| 30      | 23.4701 | 14.0697 |
| 30      | 30      | 14.8273 |
| 30      | 22.7172 | 14.4524 |
| 30      | 21.1096 | 15.4439 |
| 30      | 21.1962 | 15.2729 |
| 30      | 30      | 13.1971 |
| 30      | 30      | 17.0314 |
| 30      | 30      | 14.616  |
| 30      | 21.7555 | 16.2541 |
| 30      | 25.4825 | 14.5493 |
| 30      | 30      | 14.1419 |
| 30      | 30      | 16.0311 |
| 30      | 30      | 13.9275 |
| 30      | 30      | 14.8653 |
| 30      | 23.3828 | 13.3624 |
| 30      | 30      | 15.5969 |
| 30      | 30      | 16.0936 |
| 30      | 30      | 17.0347 |
| 30      | 30      | 13.4259 |
| 30      | 18.0998 | 13.7963 |
| 21.2845 | 15.9576 | 14.1854 |
| 30      | 23.6313 | 12.4133 |
| 30      | 27.9123 | 14.0213 |
| 20.3806 | 18.2019 | 14.8994 |
| 30      | 30      | 14.2848 |
| 16.8498 | 14.4445 | 16.0846 |
| 30      | 30      | 15.7835 |
| 30      | 24.6199 | 15.1485 |
| 30      | 30      | 15.0035 |
| 30      | 30      | 12.7386 |
| 30      | 23.8014 | 13.6103 |
| 30      | 30      | 14.1529 |
| 30      | 30      | 16.9834 |
| 30      | 30      | 16.1062 |

|         |         |         |
|---------|---------|---------|
| 30      | 22.0586 | 14.8624 |
| 21.2236 | 15.7133 | 14.8575 |
| 30      | 30      | 15.6765 |
| 17.9461 | 16.0707 | 16.6736 |
| 17.7812 | 14.9568 | 30      |
| 30      | 18.1469 | 16.5343 |
| 30      | 30      | 16.0576 |
| 30      | 30      | 14.3802 |
| 30      | 30      | 14.1122 |
| 30      | 30      | 16.2143 |

**Cdkn1a\_A86****Cdx1\_A03****Cdx1\_A15**

|         |         |         |
|---------|---------|---------|
| 16.005  | 20.2051 | 30      |
| 14.9623 | 19.4332 | 19.087  |
| 15.6297 | 20.9731 | 21.18   |
| 15.191  | 19.9453 | 18.0793 |
| 16.3581 | 20.7598 | 18.9324 |
| 16.4355 | 21.4483 | 19.8195 |
| 15.3661 | 30      | 18.6268 |
| 13.5461 | 16.7009 | 15.1528 |
| 16.854  | 21.5664 | 21.4275 |
| 15.3444 | 22.1857 | 21.1111 |
| 13.4301 | 17.7872 | 16.6875 |
| 15.9456 | 21.4044 | 20.0096 |
| 13.4666 | 22.076  | 18.3984 |
| 15.313  | 21.8103 | 30      |
| 14.679  | 30      | 19.0304 |
| 17.6341 | 30      | 30      |
| 13.9072 | 19.0525 | 18.1159 |
| 13.7476 | 20.0702 | 17.0985 |
| 14.543  | 19.3832 | 16.923  |
| 14.6156 | 20.6206 | 17.7539 |
| 16.3757 | 26.0759 | 19.8074 |
| 15.5403 | 25.9142 | 19.6279 |
| 16.4703 | 25.3538 | 30      |
| 15.5215 | 19.0571 | 17.0692 |
| 15.2321 | 20.9667 | 18.393  |
| 14.2997 | 21.1582 | 17.9529 |
| 13.5692 | 19.9242 | 17.6425 |
| 14.8265 | 20.6455 | 17.9562 |
| 15.6638 | 25.3091 | 21.6377 |
| 14.178  | 19.2963 | 17.95   |
| 15.5542 | 30      | 20.1588 |
| 14.1363 | 23.014  | 30      |
| 15.7194 | 30      | 30      |
| 15.0507 | 20.387  | 18.3301 |
| 16.9928 | 30      | 30      |
| 14.5276 | 20.9453 | 21.4171 |
| 16.6521 | 30      | 21.058  |
| 14.4861 | 22.4005 | 19.204  |
| 15.9492 | 24.0752 | 30      |
| 14.0875 | 20.4388 | 19.163  |

|         |         |         |
|---------|---------|---------|
| 17.1347 | 25.0751 | 19.3393 |
| 14.7575 | 19.782  | 17.1627 |
| 15.8464 | 24.9331 | 30      |
| 16.0428 | 30      | 22.3765 |
| 14.2235 | 19.4893 | 17.0236 |
| 13.8155 | 20.086  | 18.056  |
| 17.702  | 23.8401 | 30      |
| 13.6133 | 19.6845 | 17.3462 |
| 15.9264 | 22.4936 | 20.0215 |
| 14.8217 | 19.7217 | 15.9217 |
| 17.1994 | 27.465  | 21.7835 |
| 15.7241 | 22.8646 | 30      |
| 12.831  | 20.2112 | 18.8632 |
| 17.4985 | 30      | 30      |
| 15.9287 | 24.5567 | 19.8864 |
| 16.527  | 22.4924 | 21.099  |
| 15.2416 | 23.8198 | 19.4988 |
| 14.7612 | 25.0585 | 20.104  |
| 17.7555 | 30      | 30      |
| 14.4163 | 18.8313 | 16.6498 |
| 16.4368 | 27.3222 | 30      |
| 13.0283 | 20.5185 | 19.5957 |
| 14.5682 | 21.4689 | 18.9842 |
| 14.9162 | 22.5792 | 19.4618 |
| 17.1065 | 22.2639 | 24.6636 |
| 15.5319 | 21.335  | 21.7608 |
| 14.811  | 21.1049 | 22.5648 |
| 14.2759 | 18.9113 | 18.587  |
| 12.5659 | 18.7452 | 19.3668 |
| 15.4071 | 20.0883 | 30      |
| 15.5259 | 17.7595 | 19.8602 |
| 15.112  | 19.936  | 20.4958 |
| 17.2603 | 16.1343 | 16.8726 |
| 19.1423 | 21.7164 | 22.0967 |
| 17.2459 | 21.7771 | 27.9421 |
| 15.6737 | 21.5916 | 23.9809 |
| 13.1589 | 20.8166 | 21.3789 |
| 14.1091 | 30      | 27.1102 |
| 15.2174 | 19.4644 | 19.5384 |
| 18.7064 | 20.5947 | 20.6033 |
| 19.2774 | 20.5733 | 22.0604 |



|         |         |         |
|---------|---------|---------|
| 16.6632 | 22.4759 | 21.5046 |
| 14.9969 | 17.6836 | 18.6371 |
| 15.4226 | 30      | 30      |
| 18.7105 | 18.2024 | 20.0881 |
| 30      | 18.0475 | 19.0716 |
| 17.1469 | 30      | 22.5088 |
| 16.715  | 25.3349 | 21.1786 |
| 13.925  | 19.6182 | 18.0574 |
| 13.8604 | 22.4163 | 22.3683 |
| 16.9337 | 22.3542 | 30      |

Chga\_A27

Chga\_A39

Cubn\_A51

|    |    |         |
|----|----|---------|
| 30 | 30 | 18.603  |
| 30 | 30 | 15.8797 |
| 30 | 30 | 30      |
| 30 | 30 | 30      |
| 30 | 30 | 18.4513 |
| 30 | 30 | 30      |
| 30 | 30 | 30      |
| 30 | 30 | 30      |
| 30 | 30 | 30      |
| 30 | 30 | 14.8697 |
| 30 | 30 | 30      |
| 30 | 30 | 16.7326 |
| 30 | 30 | 16.8518 |
| 30 | 30 | 30      |
| 30 | 30 | 18.2273 |
| 30 | 30 | 30      |
| 30 | 30 | 15.8714 |
| 30 | 30 | 14.6134 |
| 30 | 30 | 14.5216 |
| 30 | 30 | 30      |
| 30 | 30 | 30      |
| 30 | 30 | 16.4947 |
| 30 | 30 | 30      |
| 30 | 30 | 13.6321 |
| 30 | 30 | 30      |
| 30 | 30 | 30      |
| 30 | 30 | 15.1559 |
| 30 | 30 | 30      |
| 30 | 30 | 30      |
| 30 | 30 | 30      |
| 30 | 30 | 17.3165 |
| 30 | 30 | 16.8767 |
| 30 | 30 | 30      |
| 30 | 30 | 30      |
| 30 | 30 | 30      |
| 30 | 30 | 30      |
| 30 | 30 | 15.7164 |
| 30 | 30 | 30      |
| 30 | 30 | 30      |
| 30 | 30 | 16.1674 |

|         |         |         |
|---------|---------|---------|
| 30      | 30      | 30      |
| 30      | 30      | 30      |
| 30      | 30      | 30      |
| 30      | 30      | 17.8695 |
| 30      | 30      | 30      |
| 30      | 30      | 30      |
| 30      | 30      | 30      |
| 30      | 30      | 14.4549 |
| 30      | 30      | 18.275  |
| 30      | 30      | 30      |
| 30      | 30      | 17.0308 |
| 30      | 30      | 17.5239 |
| 30      | 30      | 14.0185 |
| 30      | 30      | 30      |
| 18.6058 | 30      | 16.009  |
| 30      | 30      | 18.336  |
| 30      | 30      | 30      |
| 30      | 30      | 15.6921 |
| 30      | 30      | 30      |
| 30      | 30      | 30      |
| 30      | 30      | 30      |
| 18.7929 | 30      | 30      |
| 30      | 30      | 30      |
| 30      | 30      | 14.4055 |
| 30      | 30      | 24.4802 |
| 30      | 30      | 30      |
| 30      | 30      | 30      |
| 30      | 30      | 30      |
| 30      | 30      | 18.8219 |
| 30      | 30      | 30      |
| 30      | 19.442  | 24.4168 |
| 19.0657 | 30      | 22.2435 |
| 30      | 30      | 18.5045 |
| 30      | 30      | 27.6081 |
| 30      | 30      | 30      |
| 30      | 30      | 30      |
| 30      | 30      | 30      |
| 30      | 30      | 18.6659 |
| 30      | 30      | 30      |
| 17.7694 | 30      | 30      |
| 30      | 19.0253 | 30      |

|         |         |         |
|---------|---------|---------|
| 30      | 30      | 30      |
| 30      | 30      | 30      |
| 30      | 30      | 19.1643 |
| 30      | 30      | 19.2958 |
| 17.9602 | 30      | 20.2052 |
| 30      | 30      | 18.004  |
| 27.5582 | 19.5578 | 30      |
| 18.7397 | 30      | 19.0287 |
| 30      | 30      | 21.1807 |
| 30      | 30      | 30      |

**Cubn\_A63****DII4\_A75****DII4\_A87**

|         |         |         |
|---------|---------|---------|
| 18.3045 | 18.2058 | 18.6509 |
| 14.746  | 30      | 30      |
| 30      | 30      | 18.7039 |
| 30      | 19.8668 | 18.9394 |
| 30      | 17.3049 | 16.8131 |
| 30      | 30      | 30      |
| 30      | 30      | 30      |
| 30      | 30      | 30      |
| 30      | 30      | 30      |
| 16.2893 | 30      | 30      |
| 30      | 30      | 30      |
| 17.3827 | 18.197  | 18.6276 |
| 18.2544 | 18.753  | 19.8726 |
| 30      | 30      | 30      |
| 30      | 30      | 30      |
| 30      | 30      | 30      |
| 18.4868 | 18.3515 | 17.9278 |
| 14.2464 | 17.886  | 30      |
| 14.4279 | 17.5136 | 16.6385 |
| 30      | 30      | 18.786  |
| 30      | 17.9046 | 19.083  |
| 30      | 30      | 30      |
| 30      | 30      | 30      |
| 14.3318 | 17.9479 | 17.0991 |
| 30      | 30      | 30      |
| 17.1573 | 30      | 30      |
| 16.8047 | 17.7861 | 18.1767 |
| 16.1351 | 18.8052 | 18.7835 |
| 30      | 30      | 30      |
| 30      | 17.4052 | 18.6325 |
| 14.6256 | 18.393  | 17.6486 |
| 16.6033 | 30      | 18.0125 |
| 30      | 18.9103 | 30      |
| 30      | 30      | 30      |
| 30      | 30      | 30      |
| 30      | 30      | 30      |
| 13.1672 | 18.8336 | 21.329  |
| 25.8611 | 18.3521 | 19.1801 |
| 30      | 19.2004 | 18.5482 |
| 15.0239 | 17.6567 | 18.6408 |

|         |         |         |
|---------|---------|---------|
| 16.2579 | 30      | 30      |
| 16.2992 | 30      | 30      |
| 30      | 19.4654 | 19.1775 |
| 18.2303 | 18.3305 | 30      |
| 30      | 30      | 30      |
| 30      | 30      | 30      |
| 27.1696 | 17.7032 | 18.1806 |
| 13.9626 | 17.6916 | 17.2671 |
| 30      | 17.1533 | 17.7154 |
| 30      | 30      | 30      |
| 17.1962 | 30      | 30      |
| 30      | 18.2508 | 19.3444 |
| 14.2929 | 19.7007 | 19.3802 |
| 30      | 30      | 30      |
| 15.1367 | 30      | 30      |
| 17.3036 | 30      | 30      |
| 30      | 30      | 25.3347 |
| 15.5783 | 19.1456 | 17.6167 |
| 30      | 30      | 19.2809 |
| 26.813  | 30      | 30      |
| 30      | 30      | 30      |
| 30      | 17.4626 | 15.4632 |
| 30      | 18.9402 | 19.4324 |
| 14.6517 | 17.6937 | 19.341  |
| 30      | 30      | 30      |
| 30      | 30      | 30      |
| 30      | 30      | 30      |
| 30      | 30      | 15.73   |
| 15.514  | 16.1307 | 30      |
| 18.4833 | 30      | 30      |
| 30      | 26.8656 | 30      |
| 14.0082 | 14.8362 | 17.482  |
| 30      | 24.2554 | 30      |
| 30      | 30      | 30      |
| 30      | 30      | 30      |
| 30      | 22.5226 | 30      |
| 18.4226 | 15.1078 | 18.3648 |
| 19.812  | 18.715  | 30      |
| 17.6182 | 30      | 17.0068 |
| 30      | 30      | 17.8431 |
| 18.5112 | 30      | 30      |

|         |         |         |
|---------|---------|---------|
| 18.3706 | 16.4937 | 30      |
| 30      | 30      | 30      |
| 30      | 30      | 30      |
| 30      | 30      | 30      |
| 30      | 30      | 30      |
| 30      | 30      | 30      |
| 23.8678 | 30      | 30      |
| 13.2153 | 12.8693 | 16.8796 |
| 16.0576 | 18.6837 | 30      |
| 27.172  | 30      | 18.0112 |

**Dvl2\_A04****Dvl2\_A16****Efnb1\_A28**

|         |         |         |
|---------|---------|---------|
| 20.1199 | 18.5573 | 15.5466 |
| 21.6932 | 18.5594 | 14.6092 |
| 24.9334 | 30      | 15.6917 |
| 30      | 23.8173 | 15.2977 |
| 30      | 16.8306 | 15.3008 |
| 22.5218 | 23.2758 | 17.0844 |
| 30      | 30      | 16.0948 |
| 17.2056 | 30      | 15.5357 |
| 18.1945 | 23.5645 | 16.1473 |
| 30      | 30      | 17.7272 |
| 17.4876 | 16.7285 | 14.5903 |
| 30      | 18.601  | 17.6615 |
| 30      | 30      | 15.4403 |
| 30      | 17.5065 | 16.6665 |
| 30      | 30      | 30      |
| 23.0028 | 30      | 20.3359 |
| 30      | 21.1523 | 13.5757 |
| 30      | 20.4965 | 14.9196 |
| 30      | 30      | 15.2605 |
| 17.4528 | 19.6485 | 15.1532 |
| 30      | 18.7316 | 15.2461 |
| 30      | 16.7837 | 16.5295 |
| 24.4342 | 20.0919 | 18.8458 |
| 30      | 30      | 14.7153 |
| 20.8517 | 20.8188 | 15.4429 |
| 18.212  | 17.3011 | 14.3535 |
| 30      | 30      | 14.0168 |
| 30      | 19.8002 | 15.7846 |
| 20.6534 | 30      | 17.1837 |
| 21.4465 | 18.1849 | 14.6423 |
| 30      | 21.8853 | 15.5203 |
| 23.788  | 23.7248 | 15.2779 |
| 21.5569 | 30      | 16.6308 |
| 23.4192 | 30      | 16.7948 |
| 30      | 21.4541 | 18.2031 |
| 20.816  | 21.3505 | 14.9704 |
| 18.6344 | 19.2186 | 17.4173 |
| 30      | 20.081  | 15.3777 |
| 17.3392 | 18.233  | 17.4119 |
| 18.8062 | 17.2357 | 14.4805 |



|         |         |         |
|---------|---------|---------|
| 18.3016 | 17.2931 | 18.0834 |
| 22.7833 | 30      | 16.6648 |
| 18.9285 | 19.1777 | 14.9106 |
| 18.2238 | 30      | 16.0796 |
| 18.7636 | 19.4614 | 14.1618 |
| 22.4237 | 30      | 18.3674 |
| 30      | 20.4428 | 18.0389 |
| 23.3375 | 30      | 13.4625 |
| 30      | 17.8354 | 16.746  |
| 22.9773 | 24.801  | 13.7922 |
| 30      | 30      | 17.2279 |
| 16.2243 | 16.9671 | 14.8592 |
| 15.7761 | 15.7078 | 12.5766 |
| 20.6069 | 30      | 14.5867 |
| 30      | 18.4649 | 16.6677 |
| 18.051  | 16.7143 | 16.7777 |
| 30      | 30      | 14.9258 |
| 21.7302 | 24.401  | 16.0801 |
| 30      | 18.5375 | 15.9944 |
| 17.627  | 17.0023 | 17.7955 |
| 30      | 30      | 15.9844 |
| 30      | 30      | 16.1009 |
| 30      | 18.9219 | 15.4598 |
| 30      | 18.6468 | 14.2447 |
| 30      | 18.7597 | 30      |
| 30      | 30      | 17.7564 |
| 30      | 17.7305 | 17.0976 |
| 15.5599 | 21.6858 | 19.121  |
| 18.2678 | 25.2152 | 18.2625 |
| 30      | 30      | 18.7566 |
| 30      | 19.7268 | 21.545  |
| 30      | 30      | 23.9805 |
| 30      | 18.4575 | 17.3039 |
| 27.4045 | 30      | 30      |
| 30      | 30      | 18.9023 |
| 30      | 17.8321 | 17.4036 |
| 17.0212 | 30      | 17.6727 |
| 19.2982 | 18.6723 | 17.7678 |
| 30      | 18.6955 | 17.7606 |
| 19.3083 | 30      | 30      |
| 30      | 30      | 16.5003 |

|         |         |         |
|---------|---------|---------|
| 27.0031 | 30      | 15.739  |
| 30      | 30      | 20.9534 |
| 30      | 30      | 21.5632 |
| 30      | 30      | 30      |
| 30      | 25.1254 | 30      |
| 19.4644 | 17.648  | 17.1332 |
| 30      | 30      | 18.9057 |
| 17.2743 | 18.5106 | 19.3754 |
| 30      | 16.7807 | 21.2626 |
| 18.3    | 30      | 18.9347 |

Efnb1\_A40

Epas1\_A52

Epas1\_A64

|         |         |         |
|---------|---------|---------|
| 17.366  | 17.8617 | 17.8452 |
| 14.7124 | 15.2217 | 15.6268 |
| 15.5556 | 15.451  | 17.5928 |
| 17.139  | 14.7973 | 14.0758 |
| 16.3497 | 17.3373 | 17.157  |
| 15.7946 | 15.024  | 30      |
| 17.6776 | 16.1018 | 19.3002 |
| 14.4743 | 18.4082 | 17.9155 |
| 16.2109 | 18.0728 | 17.035  |
| 15.5118 | 16.0853 | 15.7647 |
| 14.3739 | 17.6478 | 16.3036 |
| 16.5757 | 16.4348 | 17.3225 |
| 16.4959 | 15.5663 | 15.5816 |
| 15.7643 | 17.331  | 30      |
| 16.6733 | 15.997  | 16.138  |
| 16.4158 | 17.5353 | 30      |
| 14.7897 | 15.3177 | 14.8608 |
| 17.9189 | 14.7584 | 16.1904 |
| 16.708  | 15.2795 | 14.4361 |
| 16.1307 | 17.1088 | 16.5557 |
| 16.3624 | 14.8646 | 17.14   |
| 16.1209 | 17.414  | 18.8485 |
| 21.4866 | 17.9247 | 30      |
| 16.6717 | 14.6026 | 14.0885 |
| 15.951  | 15.0645 | 14.2098 |
| 14.7672 | 14.0113 | 14.0317 |
| 15.9783 | 13.5639 | 13.2316 |
| 15.6207 | 15.0111 | 14.3426 |
| 17.5176 | 19.1093 | 30      |
| 15.8874 | 14.8852 | 15.267  |
| 15.8152 | 19.5494 | 17.6049 |
| 15.8476 | 14.9709 | 15.2258 |
| 16.8422 | 18.6167 | 30      |
| 15.9969 | 14.7637 | 14.1555 |
| 17.0148 | 19.0879 | 20.4965 |
| 15.9222 | 14.6004 | 14.2024 |
| 17.4106 | 16.4776 | 17.1583 |
| 15.6447 | 15.9009 | 15.0367 |
| 18.1051 | 15.3487 | 17.4532 |
| 15.1216 | 13.3955 | 13.4638 |

|         |         |         |
|---------|---------|---------|
| 16.3663 | 15.9178 | 18.6061 |
| 16.8009 | 15.6648 | 15.7596 |
| 15.6168 | 16.4956 | 30      |
| 16.2183 | 17.0647 | 30      |
| 15.9862 | 14.8863 | 14.1323 |
| 15.792  | 17.1922 | 30      |
| 18.0995 | 17.2862 | 18.6507 |
| 14.9548 | 14.043  | 13.1691 |
| 18.986  | 15.4741 | 15.1798 |
| 15.4373 | 14.0239 | 13.7298 |
| 17.7105 | 16.8788 | 17.6037 |
| 15.2596 | 16.9761 | 20.2399 |
| 14.9135 | 14.7579 | 14.0383 |
| 15.5914 | 17.5993 | 30      |
| 16.7763 | 17.3469 | 16.9367 |
| 15.3672 | 30      | 30      |
| 15.8641 | 15.8416 | 14.8676 |
| 15.9132 | 15.9758 | 16.1346 |
| 18.783  | 30      | 17.9079 |
| 15.8929 | 17.0608 | 17.0796 |
| 16.8719 | 30      | 19.3326 |
| 30      | 14.4461 | 14.8271 |
| 16.0976 | 15.4149 | 15.5966 |
| 15.9804 | 15.0629 | 14.6749 |
| 30      | 19.0334 | 19.4485 |
| 30      | 21.3106 | 17.6221 |
| 15.5425 | 14.8483 | 15.3248 |
| 17.5405 | 16.6103 | 16.9873 |
| 13.2571 | 14.8288 | 13.0717 |
| 16.1239 | 16.4974 | 16.8714 |
| 13.997  | 14.7114 | 14.9427 |
| 14.7094 | 15.4436 | 18.727  |
| 13.8346 | 14.8406 | 15.0742 |
| 27.0493 | 30      | 16.3299 |
| 16.7773 | 18.8566 | 17.6092 |
| 16.0728 | 18.5347 | 16.4331 |
| 13.8637 | 15.2979 | 13.7547 |
| 15.5857 | 15.7767 | 15.6534 |
| 15.1855 | 15.5967 | 19.0953 |
| 30      | 30      | 19.1638 |
| 16.5012 | 16.4219 | 17.6147 |

|         |         |         |
|---------|---------|---------|
| 30      | 16.8953 | 16.3325 |
| 13.5645 | 15.5291 | 14.9688 |
| 16.2127 | 17.32   | 16.7639 |
| 16.3484 | 17.4969 | 18.546  |
| 15.3789 | 16.689  | 16.323  |
| 15.8218 | 16.4627 | 15.5091 |
| 16.5488 | 17.3023 | 30      |
| 14.6425 | 14.5347 | 13.891  |
| 15.8557 | 16.4347 | 14.2314 |
| 16.3031 | 16.41   | 16.4046 |

Ephb2\_A76

Ephb2\_A88

Ereg\_A05

|         |         |         |
|---------|---------|---------|
| 30      | 30      | 30      |
| 27.1031 | 30      | 30      |
| 23.1071 | 30      | 30      |
| 16.7071 | 30      | 30      |
| 24.7768 | 27.7262 | 30      |
| 23.6186 | 30      | 30      |
| 26.3027 | 30      | 30      |
| 15.7329 | 19.839  | 30      |
| 24.7916 | 19.6027 | 30      |
| 20.2418 | 30      | 30      |
| 18.115  | 18.5695 | 30      |
| 24.2315 | 30      | 30      |
| 30      | 30      | 30      |
| 20.151  | 30      | 30      |
| 30      | 30      | 30      |
| 20.2141 | 30      | 30      |
| 26.1759 | 19.7504 | 30      |
| 17.2381 | 30      | 17.7679 |
| 22.5605 | 19.6636 | 30      |
| 17.163  | 17.2287 | 30      |
| 19.0542 | 30      | 30      |
| 23.1514 | 30      | 16.9688 |
| 18.2547 | 30      | 30      |
| 15.7363 | 19.7153 | 30      |
| 25.7185 | 30      | 30      |
| 16.7097 | 18.6284 | 15.5417 |
| 18.6544 | 30      | 30      |
| 22.3493 | 30      | 30      |
| 15.8091 | 18.1118 | 30      |
| 18.0241 | 19.1549 | 30      |
| 20.4027 | 30      | 30      |
| 27.6134 | 30      | 30      |
| 30      | 30      | 30      |
| 16.8532 | 30      | 30      |
| 20.1915 | 30      | 30      |
| 14.887  | 17.6711 | 30      |
| 17.5929 | 30      | 30      |
| 15.1911 | 17.5363 | 30      |
| 16.0433 | 30      | 30      |
| 16.0356 | 20.0191 | 30      |

|         |         |         |
|---------|---------|---------|
| 21.2286 | 30      | 30      |
| 15.6059 | 30      | 16.7348 |
| 18.6342 | 30      | 30      |
| 17.0482 | 30      | 30      |
| 18.78   | 30      | 30      |
| 15.8363 | 18.1051 | 30      |
| 15.5354 | 30      | 30      |
| 17.1185 | 30      | 30      |
| 16.4401 | 30      | 30      |
| 15.5431 | 30      | 30      |
| 15.6277 | 30      | 30      |
| 27.5915 | 30      | 30      |
| 16.7756 | 30      | 30      |
| 16.8149 | 30      | 30      |
| 14.4805 | 30      | 30      |
| 30      | 30      | 30      |
| 15.4098 | 19.5985 | 30      |
| 14.3881 | 22.5512 | 30      |
| 15.2886 | 30      | 30      |
| 15.2693 | 17.1703 | 30      |
| 14.1424 | 30      | 30      |
| 13.781  | 30      | 30      |
| 23.3601 | 30      | 30      |
| 30      | 30      | 30      |
| 30      | 25.3683 | 30      |
| 16.146  | 17.0213 | 30      |
| 16.4495 | 19.949  | 30      |
| 16.5468 | 17.0888 | 30      |
| 12.593  | 18.3404 | 30      |
| 15.7478 | 15.8132 | 30      |
| 14.1547 | 14.6314 | 19.545  |
| 15.9244 | 16.1657 | 30      |
| 14.0386 | 14.7347 | 20.5305 |
| 30      | 16.6242 | 30      |
| 20.0964 | 17.8156 | 26.0183 |
| 17.5189 | 24.1718 | 30      |
| 13.4225 | 20.9466 | 19.3494 |
| 15.7305 | 16.991  | 30      |
| 19.3529 | 20.0099 | 30      |
| 30      | 17.1679 | 19.0746 |
| 18.7628 | 14.3347 | 30      |

|         |         |         |
|---------|---------|---------|
| 18.5168 | 16.2117 | 20.7185 |
| 14.9921 | 13.1443 | 17.2907 |
| 18.8149 | 16.2434 | 30      |
| 18.007  | 12.0783 | 18.2738 |
| 15.7244 | 14.7433 | 17.1137 |
| 17.3797 | 16.2807 | 30      |
| 19.5368 | 11.359  | 30      |
| 14.1122 | 13.4909 | 17.8174 |
| 14.0752 | 14.3112 | 30      |
| 17.4963 | 12.6526 | 30      |



Ereg\_A17

Fut2\_A29

Fut2\_A41

|         |         |         |
|---------|---------|---------|
| 30      | 30      | 17.0005 |
| 30      | 30      | 18.8647 |
| 30      | 30      | 17.5149 |
| 30      | 30      | 19.0043 |
| 30      | 18.2976 | 15.4795 |
| 30      | 30      | 30      |
| 30      | 30      | 18.0613 |
| 30      | 12.9305 | 12.9654 |
| 30      | 30      | 16.5086 |
| 30      | 30      | 19.6919 |
| 30      | 13.7877 | 13.7732 |
| 30      | 30      | 30      |
| 30      | 30      | 20.2684 |
| 30      | 30      | 15.8272 |
| 30      | 30      | 30      |
| 30      | 30      | 18.1527 |
| 30      | 30      | 17.7334 |
| 30      | 30      | 30      |
| 30      | 30      | 18.3267 |
| 30      | 14.0296 | 13.7164 |
| 30      | 30      | 16.403  |
| 30      | 30      | 19.1336 |
| 30      | 25.3207 | 16.5486 |
| 30      | 30      | 22.6366 |
| 30      | 30      | 30      |
| 16.4821 | 30      | 16.7923 |
| 30      | 30      | 30      |
| 30      | 30      | 18.9109 |
| 30      | 21.0871 | 16.4676 |
| 30      | 30      | 24.172  |
| 30      | 30      | 17.285  |
| 30      | 30      | 17.9699 |
| 30      | 30      | 17.32   |
| 16.7942 | 30      | 19.7724 |
| 30      | 30      | 30      |
| 30      | 30      | 20.1301 |
| 30      | 30      | 30      |
| 30      | 30      | 17.6233 |
| 30      | 15.9985 | 18.0971 |
| 16.609  | 30      | 17.9688 |





**Gapdh\_A53****Gapdh\_A65****Gsk3b\_A77**

|         |         |         |
|---------|---------|---------|
| 10.6861 | 10.6212 | 15.0359 |
| 8.34323 | 8.33794 | 16.1325 |
| 10.1287 | 10.0018 | 19.6155 |
| 8.64826 | 8.31046 | 14.4662 |
| 10.8547 | 10.6525 | 16.5623 |
| 10.7935 | 10.7374 | 17.7554 |
| 10.1483 | 10.1007 | 30      |
| 10.7298 | 10.717  | 14.8112 |
| 10.8629 | 10.8813 | 16.298  |
| 9.99049 | 9.98001 | 16.4092 |
| 10.497  | 10.4493 | 14.5852 |
| 10.5686 | 10.5743 | 18.0611 |
| 8.4443  | 8.49768 | 13.382  |
| 10.6327 | 10.512  | 17.8625 |
| 10.4832 | 10.3935 | 14.9886 |
| 11.4498 | 11.4359 | 17.1196 |
| 9.03259 | 8.901   | 14.3913 |
| 8.83662 | 8.91533 | 16.2713 |
| 8.90122 | 9.07708 | 16.0928 |
| 11.6291 | 11.8721 | 15.1386 |
| 10.6281 | 10.9177 | 17.3527 |
| 10.7067 | 10.7582 | 18.1893 |
| 10.4466 | 10.6555 | 18.4031 |
| 8.67345 | 8.81505 | 15.0208 |
| 8.48349 | 8.49181 | 14.669  |
| 8.33371 | 8.37775 | 13.6129 |
| 8.281   | 8.40715 | 13.9019 |
| 8.77548 | 8.86865 | 14.7379 |
| 12.4931 | 12.5142 | 30      |
| 8.86547 | 8.97698 | 14.8339 |
| 10.7401 | 11.0904 | 16.9249 |
| 8.79448 | 8.8643  | 14.9772 |
| 11.7584 | 11.7231 | 18.5445 |
| 9.25344 | 9.0979  | 15.0782 |
| 10.6308 | 10.5737 | 18.3661 |
| 8.83808 | 8.77901 | 14.1122 |
| 10.1743 | 10.1775 | 15.726  |
| 8.64955 | 8.63314 | 14.5003 |
| 9.55021 | 9.54119 | 15.8247 |
| 8.11178 | 8.29853 | 13.2732 |

|         |         |         |
|---------|---------|---------|
| 11.6029 | 11.5911 | 18.0391 |
| 8.70765 | 8.6582  | 13.9946 |
| 11.5057 | 11.2633 | 16.8539 |
| 10.0057 | 10.0128 | 30      |
| 8.05367 | 8.07539 | 13.7396 |
| 10.9875 | 10.9593 | 15.585  |
| 11.0087 | 10.9256 | 30      |
| 8.385   | 8.40829 | 13.0513 |
| 9.38341 | 9.4557  | 15.4203 |
| 8.29927 | 8.38187 | 14.4963 |
| 11.6427 | 11.9382 | 18.5508 |
| 10.4405 | 10.6418 | 15.9594 |
| 8.40774 | 8.40959 | 13.8459 |
| 11.0323 | 11.18   | 16.9173 |
| 11.5044 | 11.5623 | 16.8031 |
| 11.4556 | 11.5088 | 30      |
| 9.31987 | 9.31144 | 15.4134 |
| 9.68568 | 9.71358 | 17.3903 |
| 10.8522 | 10.9299 | 16.0559 |
| 10.5853 | 10.6209 | 15.8354 |
| 9.84626 | 9.84856 | 30      |
| 8.48679 | 8.48742 | 14.0443 |
| 8.68436 | 8.70297 | 15.2554 |
| 8.87859 | 8.8932  | 13.9958 |
| 17.7393 | 11.5978 | 11.6048 |
| 17.2712 | 10.2253 | 10.2445 |
| 15.9265 | 9.96483 | 9.95093 |
| 17.6882 | 11.6465 | 11.6543 |
| 19.4002 | 8.33701 | 8.33499 |
| 18.2845 | 10.3026 | 10.3044 |
| 19.9285 | 9.10061 | 9.08327 |
| 17.7584 | 9.96064 | 9.98516 |
| 30      | 9.60075 | 9.58123 |
| 18.6651 | 12.1109 | 12.1179 |
| 15.6471 | 11.321  | 11.3347 |
| 30      | 10.0496 | 10.05   |
| 23.3798 | 9.4516  | 9.4441  |
| 24.4488 | 9.25264 | 9.26277 |
| 18.222  | 10.1897 | 10.1965 |
| 30      | 13.665  | 13.804  |
| 18.0182 | 10.8755 | 11.0167 |

|         |         |         |
|---------|---------|---------|
| 30      | 11.2475 | 11.4323 |
| 23.1621 | 9.01924 | 9.20993 |
| 30      | 10.764  | 10.9258 |
| 17.7725 | 11.0336 | 11.1356 |
| 18.6569 | 11.4079 | 11.4898 |
| 18.807  | 10.3453 | 10.4053 |
| 17.2644 | 11.2667 | 11.3481 |
| 20.138  | 9.29137 | 9.4391  |
| 19.5105 | 8.74683 | 8.88415 |
| 14.5752 | 10.8783 | 10.9839 |

**Gsk3b\_A89****Gusb\_A06****Gusb\_A18**

|         |         |         |
|---------|---------|---------|
| 16.8676 | 30      | 19.1356 |
| 16.284  | 18.9764 | 17.3527 |
| 17.5589 | 30      | 18.2835 |
| 14.6242 | 18.3283 | 18.8948 |
| 16.8692 | 28.0741 | 16.4367 |
| 16.1413 | 30      | 17.8007 |
| 17.1055 | 30      | 30      |
| 14.4153 | 18.1063 | 15.6633 |
| 17.2946 | 30      | 18.4349 |
| 16.3095 | 19.3012 | 18.18   |
| 16.5824 | 16.3874 | 15.721  |
| 16.6222 | 30      | 23.8853 |
| 14.3367 | 18.2842 | 18.055  |
| 16.5914 | 30      | 17.7696 |
| 14.6685 | 30      | 30      |
| 18.8122 | 19.1427 | 17.8709 |
| 14.3563 | 16.427  | 16.6817 |
| 14.8079 | 17.7125 | 16.4112 |
| 15.163  | 17.7609 | 15.7679 |
| 16.7822 | 18.2743 | 15.5422 |
| 17.2413 | 18.9209 | 19.8295 |
| 17.8909 | 30      | 17.3013 |
| 15.9107 | 30      | 17.4469 |
| 14.8727 | 25.3163 | 16.8249 |
| 14.8538 | 30      | 22.6858 |
| 14.0374 | 30      | 22.5272 |
| 14.0593 | 30      | 30      |
| 14.6801 | 19.5982 | 17.1534 |
| 18.2286 | 30      | 18.1051 |
| 16.5981 | 17.2558 | 15.2585 |
| 17.0668 | 30      | 21.642  |
| 15.3776 | 18.8432 | 24.1024 |
| 17.8386 | 30      | 30      |
| 15.2959 | 19.5559 | 16.5416 |
| 18.5711 | 30      | 25.5242 |
| 14.1725 | 16.7943 | 15.7205 |
| 18.005  | 30      | 26.0542 |
| 14.4347 | 30      | 30      |
| 17.5745 | 19.1099 | 18.8483 |
| 13.6662 | 17.7122 | 16.3825 |

|         |         |         |
|---------|---------|---------|
| 23.4457 | 30      | 19.5102 |
| 14.2796 | 17.7886 | 16.8812 |
| 17.4125 | 19.0458 | 30      |
| 16.4122 | 30      | 18.7157 |
| 13.5229 | 30      | 18.7526 |
| 15.7223 | 16.3517 | 16.5458 |
| 16.5881 | 30      | 20.4974 |
| 13.0048 | 22.5142 | 18.0975 |
| 15.8527 | 15.8871 | 16.4457 |
| 14.6418 | 18.024  | 16.9013 |
| 30      | 30      | 18.2077 |
| 19.316  | 30      | 18.9524 |
| 13.7538 | 18.7307 | 17.0656 |
| 16.5982 | 30      | 17.1971 |
| 18.2138 | 30      | 17.3157 |
| 17.8816 | 30      | 17.675  |
| 13.8485 | 18.8387 | 30      |
| 15.9387 | 30      | 17.7278 |
| 17.0856 | 19.1032 | 18.0917 |
| 14.7569 | 16.7763 | 15.8348 |
| 17.5232 | 30      | 30      |
| 13.3377 | 19.2077 | 16.1013 |
| 15.4869 | 30      | 16.8349 |
| 13.9658 | 19.3689 | 30      |
| 18.9048 | 21.5434 | 30      |
| 16.3413 | 17.7083 | 30      |
| 14.9944 | 16.2528 | 19.2236 |
| 15.1605 | 15.7528 | 30      |
| 14.7781 | 14.0985 | 18.2201 |
| 15.4935 | 30      | 18.9568 |
| 15.6372 | 14.2738 | 16.1696 |
| 14.3721 | 16.6785 | 30      |
| 13.6695 | 14.5433 | 18.994  |
| 30      | 30      | 30      |
| 16.6418 | 18.3261 | 30      |
| 30      | 17.5937 | 30      |
| 13.8051 | 14.2244 | 18.4098 |
| 14.8828 | 15.3706 | 18.2011 |
| 26.4057 | 17.0139 | 30      |
| 14.9455 | 16.4336 | 30      |
| 16.7986 | 17.4719 | 30      |



|         |         |         |
|---------|---------|---------|
| 16.7827 | 17.0922 | 18.267  |
| 15.0006 | 14.9646 | 16.8882 |
| 16.4497 | 17.7589 | 19.1311 |
| 18.263  | 15.4965 | 18.0584 |
| 16.3094 | 15.6467 | 17.523  |
| 15.632  | 18.4309 | 30      |
| 30      | 16.6955 | 28.9383 |
| 13.8268 | 13.1176 | 19.9051 |
| 14.2167 | 14.9292 | 18.9765 |
| 18.3735 | 17.6704 | 19.2557 |

**H6pd\_A30****H6pd\_A42****Hes1\_A54**

|         |         |         |
|---------|---------|---------|
| 30      | 27.2706 | 25.2165 |
| 19.8554 | 30      | 17.6443 |
| 30      | 26.2708 | 30      |
| 18.7989 | 17.0462 | 18.6945 |
| 30      | 30      | 30      |
| 30      | 30      | 30      |
| 19.7395 | 30      | 30      |
| 19.6898 | 16.274  | 30      |
| 30      | 30      | 20.0446 |
| 18.3161 | 30      | 15.9144 |
| 17.9434 | 17.0966 | 30      |
| 30      | 30      | 17.8965 |
| 18.5677 | 18.8645 | 19.6848 |
| 30      | 30      | 19.0939 |
| 30      | 18.8525 | 30      |
| 30      | 26.5462 | 19.965  |
| 17.9532 | 16.3561 | 20.5074 |
| 22.578  | 18.5916 | 30      |
| 30      | 19.3266 | 23.883  |
| 18.3574 | 17.23   | 30      |
| 30      | 30      | 30      |
| 19.4869 | 19.2285 | 30      |
| 30      | 27.1041 | 30      |
| 17.1484 | 15.3689 | 19.0033 |
| 18.3807 | 17.9643 | 18.6407 |
| 19.1374 | 18.7382 | 30      |
| 17.8862 | 18.2996 | 23.4269 |
| 20.7757 | 19.0483 | 17.3922 |
| 30      | 25.0485 | 30      |
| 17.4103 | 16.6277 | 21.4712 |
| 30      | 20.6541 | 20.3032 |
| 18.4142 | 20.6128 | 20.6501 |
| 18.6966 | 18.4566 | 30      |
| 22.8536 | 18.7433 | 18.5063 |
| 19.6559 | 30      | 30      |
| 30      | 23.3894 | 18.7568 |
| 18.9454 | 17.5543 | 30      |
| 30      | 18.9629 | 16.6159 |
| 30      | 30      | 17.0276 |
| 30      | 21.7441 | 30      |

|         |         |         |
|---------|---------|---------|
| 30      | 30      | 30      |
| 18.0833 | 18.8746 | 24.0217 |
| 30      | 18.7808 | 23.9842 |
| 30      | 25.3383 | 19.1331 |
| 20.7115 | 19.6985 | 18.0046 |
| 30      | 19.8961 | 30      |
| 30      | 23.6468 | 30      |
| 18.8208 | 18.9451 | 18.3914 |
| 30      | 30      | 30      |
| 18.0288 | 18.0308 | 19.5443 |
| 30      | 20.9355 | 30      |
| 30      | 20.3554 | 17.7414 |
| 18.238  | 17.8633 | 17.403  |
| 18.4571 | 16.7983 | 18.2594 |
| 22.915  | 19.6862 | 30      |
| 30      | 18.6443 | 30      |
| 19.562  | 18.2861 | 20.388  |
| 19.6353 | 30      | 30      |
| 30      | 21.207  | 30      |
| 19.8248 | 27.9401 | 30      |
| 30      | 17.6229 | 30      |
| 30      | 21.9195 | 18.7539 |
| 30      | 20.4631 | 19.721  |
| 30      | 21.6793 | 30      |
| 19.3393 | 30      | 20.0809 |
| 17.5951 | 20.1863 | 18.4878 |
| 17.0733 | 30      | 24.5486 |
| 30      | 18.1    | 16.8065 |
| 15.8228 | 16.8323 | 14.9785 |
| 16.9401 | 30      | 18.465  |
| 15.974  | 17.7182 | 16.1856 |
| 19.9421 | 21.6895 | 19.7813 |
| 18.6673 | 30      | 18.4444 |
| 30      | 30      | 18.9528 |
| 17.6575 | 19.2778 | 19.7219 |
| 30      | 20.2769 | 30      |
| 18.8658 | 18.811  | 19.6138 |
| 18.2264 | 30      | 22.1666 |
| 18.4563 | 30      | 19.9549 |
| 30      | 20.6534 | 18.2786 |
| 16.707  | 19.9084 | 17.2889 |

|         |         |         |
|---------|---------|---------|
| 16.292  | 19.9695 | 17.422  |
| 16.0584 | 17.838  | 16.9314 |
| 17.7654 | 30      | 19.3417 |
| 17.4587 | 19.4683 | 17.9109 |
| 18.0962 | 30      | 21.1941 |
| 20.704  | 19.7926 | 18.8261 |
| 26.3931 | 18.0266 | 19.1426 |
| 17.3336 | 15.7445 | 15.7183 |
| 17.5968 | 30      | 25.363  |
| 18.4061 | 18.7084 | 22.61   |

Hes1\_A66

Hes5\_A78

Hes5\_A90

|         |         |         |
|---------|---------|---------|
| 19.957  | 24.3047 | 20.1661 |
| 21.0407 | 25.4258 | 21.1909 |
| 21.4894 | 21.3992 | 21.7232 |
| 15.6422 | 30      | 30      |
| 20.3447 | 19.6694 | 19.695  |
| 20.6024 | 19.4423 | 19.8593 |
| 21.747  | 23.6362 | 24.7641 |
| 30      | 26.8774 | 30      |
| 17.4983 | 22.1426 | 21.2623 |
| 18.5176 | 30      | 21.8561 |
| 30      | 30      | 30      |
| 18.4723 | 22.9125 | 30      |
| 18.8808 | 30      | 30      |
| 19.3531 | 30      | 19.7916 |
| 20.4832 | 30      | 30      |
| 30      | 30      | 30      |
| 15.7038 | 30      | 30      |
| 30      | 23.5631 | 30      |
| 17.8354 | 30      | 21.8289 |
| 19.7369 | 30      | 30      |
| 30      | 30      | 30      |
| 19.3639 | 21.8098 | 21.2682 |
| 20.3929 | 26.7443 | 22.1536 |
| 17.4448 | 25.2965 | 30      |
| 21.631  | 20.5255 | 21.3486 |
| 30      | 30      | 30      |
| 18.4342 | 24.3213 | 22.1639 |
| 15.4881 | 30      | 30      |
| 30      | 20.9665 | 22.8202 |
| 17.9064 | 22.9733 | 25.1185 |
| 17.679  | 20.7606 | 27.8986 |
| 30      | 30      | 26.8836 |
| 18.5482 | 30      | 22.0238 |
| 16.2533 | 20.4588 | 21.6388 |
| 30      | 22.5755 | 30      |
| 17.5451 | 30      | 30      |
| 30      | 26.681  | 24.3484 |
| 15.2891 | 30      | 30      |
| 17.095  | 26.7646 | 22.4471 |
| 21.7821 | 30      | 30      |

|         |         |         |
|---------|---------|---------|
| 20.8535 | 19.9192 | 19.6493 |
| 18.2137 | 30      | 30      |
| 18.085  | 19.9659 | 23.2842 |
| 18.1014 | 30      | 30      |
| 16.4052 | 30      | 30      |
| 30      | 20.1724 | 22.4175 |
| 18.4413 | 30      | 30      |
| 15.8464 | 30      | 30      |
| 17.8758 | 21.6517 | 30      |
| 18.4651 | 30      | 30      |
| 30      | 21.3681 | 21.9498 |
| 17.0233 | 21.1685 | 21.7548 |
| 15.8615 | 22.9789 | 24.4402 |
| 30      | 30      | 30      |
| 30      | 30      | 30      |
| 19.3691 | 20.0157 | 21.3181 |
| 25.8728 | 25.7763 | 30      |
| 20.927  | 30      | 23.18   |
| 30      | 20.8911 | 30      |
| 30      | 30      | 30      |
| 30      | 30      | 30      |
| 16.5517 | 22.311  | 26.9951 |
| 30      | 21.386  | 22.4927 |
| 30      | 30      | 30      |
| 20.3571 | 18.6772 | 30      |
| 30      | 30      | 25.94   |
| 30      | 30      | 20.3789 |
| 17.2704 | 16.2936 | 30      |
| 18.0544 | 16.9776 | 30      |
| 30      | 30      | 30      |
| 17.3492 | 15.8232 | 22.1402 |
| 30      | 30      | 30      |
| 14.9394 | 13.3786 | 30      |
| 30      | 30      | 30      |
| 30      | 21.4047 | 23.0617 |
| 30      | 30      | 20.8427 |
| 18.1777 | 17.2658 | 30      |
| 17.9449 | 20.9001 | 21.9672 |
| 22.7912 | 23.7567 | 30      |
| 30      | 30      | 30      |
| 30      | 21.5455 | 22.5232 |

|         |         |         |
|---------|---------|---------|
| 17.7582 | 21.7844 | 22.1197 |
| 15.6762 | 14.3837 | 24.8256 |
| 30      | 30      | 24.8263 |
| 15.2615 | 13.6386 | 30      |
| 26.6584 | 22.7117 | 30      |
| 30      | 26.6424 | 25.8754 |
| 18.5647 | 19.2292 | 22.7254 |
| 18.2196 | 15.8791 | 20.96   |
| 20.3021 | 17.0293 | 27.9796 |
| 30      | 23.4808 | 20.6316 |

**Hif1a\_A07****Hif1a\_A19****Hopx\_A31**

|         |         |         |
|---------|---------|---------|
| 17.3475 | 17.9048 | 30      |
| 14.1722 | 13.3585 | 16.2215 |
| 30      | 15.9173 | 18.8822 |
| 15.2756 | 15.6525 | 30      |
| 16.5725 | 22.31   | 19.0754 |
| 18.1589 | 17.4663 | 30      |
| 17.0452 | 17.3685 | 25.7323 |
| 14.841  | 13.8901 | 13.076  |
| 15.96   | 16.514  | 16.3688 |
| 18.3021 | 30      | 30      |
| 15.2254 | 14.1197 | 12.4304 |
| 18.4947 | 15.9632 | 30      |
| 15.6435 | 14.2853 | 13.9672 |
| 18.383  | 30      | 18.9475 |
| 16.945  | 16.7944 | 18.0024 |
| 30      | 30      | 18.8712 |
| 15.4513 | 14.5186 | 17.5456 |
| 15.7345 | 14.6065 | 17.3674 |
| 15.2638 | 15.2174 | 15.9653 |
| 17.3628 | 17.6732 | 13.7179 |
| 17.3075 | 30      | 16.3396 |
| 30      | 30      | 17.2569 |
| 16.3946 | 30      | 30      |
| 14.8693 | 16.4124 | 14.7074 |
| 13.6706 | 12.9134 | 15.6052 |
| 13.9124 | 13.6602 | 12.9535 |
| 14.9849 | 14.7222 | 17.0909 |
| 14.8315 | 14.4977 | 15.7258 |
| 26.4127 | 30      | 14.5494 |
| 14.6569 | 13.5696 | 16.2139 |
| 30      | 16.5959 | 20.0397 |
| 15.2473 | 15.3641 | 14.8538 |
| 18.5824 | 17.7743 | 19.2177 |
| 17.6022 | 15.157  | 14.187  |
| 16.9146 | 30      | 18.1904 |
| 16.1093 | 16.0719 | 15.4815 |
| 16.519  | 16.127  | 17.2913 |
| 15.4709 | 14.5865 | 17.677  |
| 17.5318 | 17.7859 | 30      |
| 14.0868 | 13.3802 | 14.4193 |



|         |         |         |
|---------|---------|---------|
| 30      | 30      | 19.3823 |
| 15.0297 | 14.1438 | 15.7628 |
| 30      | 21.2704 | 25.5952 |
| 17.8241 | 14.6986 | 19.0739 |
| 14.4891 | 13.9459 | 17.6439 |
| 16.4362 | 16.2944 | 13.3648 |
| 15.8307 | 16.8737 | 17.417  |
| 15.4541 | 14.6766 | 16.7916 |
| 17.2312 | 15.4217 | 18.34   |
| 14.1613 | 13.0891 | 15.8315 |
| 30      | 30      | 30      |
| 18.0721 | 30      | 30      |
| 14.775  | 13.9778 | 15.5973 |
| 18.2712 | 30      | 21.6708 |
| 30      | 30      | 19.0038 |
| 18.0534 | 30      | 23.0737 |
| 17.1584 | 17.5253 | 17.0108 |
| 15.2645 | 14.4115 | 18.7968 |
| 30      | 30      | 17.6855 |
| 18.4201 | 15.2436 | 12.983  |
| 17.4714 | 18.6536 | 30      |
| 14.4325 | 14.4249 | 15.1461 |
| 14.9032 | 14.4518 | 15.9713 |
| 14.7664 | 14.1121 | 18.9643 |
| 30      | 30      | 30      |
| 21.0472 | 18.5223 | 15.8317 |
| 20.9089 | 30      | 16.0184 |
| 30      | 17.5002 | 19.7546 |
| 30      | 15.1727 | 14.7236 |
| 30      | 15.9204 | 15.5496 |
| 22.475  | 16.5284 | 14.1765 |
| 30      | 30      | 16.6697 |
| 30      | 14.1402 | 13.579  |
| 21.807  | 30      | 17.6827 |
| 25.7706 | 18.3356 | 17.614  |
| 22.3175 | 15.564  | 16.8301 |
| 30      | 15.1849 | 14.5282 |
| 22.7638 | 15.9614 | 14.2245 |
| 30      | 16.6893 | 16.0816 |
| 30      | 16.6158 | 16.4926 |
| 22.3915 | 17.4012 | 15.2228 |

|         |         |         |
|---------|---------|---------|
| 25.0194 | 18.1638 | 17.4364 |
| 24.2372 | 14.7736 | 14.3234 |
| 27.3177 | 30      | 30      |
| 30      | 16.1927 | 16.1519 |
| 30      | 15.5654 | 14.8613 |
| 30      | 17.258  | 16.4305 |
| 21.9142 | 30      | 30      |
| 23.0815 | 14.9193 | 14.2164 |
| 30      | 15.9027 | 14.7431 |
| 21.3225 | 30      | 17.5112 |

Hopx\_A43

Jag1\_A55

Jag1\_A67

|         |         |         |
|---------|---------|---------|
| 30      | 22.0208 | 30      |
| 16.2037 | 30      | 30      |
| 18.5873 | 21.1722 | 23.9257 |
| 30      | 16.5292 | 30      |
| 18.7898 | 20.8783 | 30      |
| 30      | 18.2091 | 30      |
| 26.5269 | 22.0688 | 30      |
| 12.9936 | 20.8601 | 30      |
| 16.2827 | 18.3456 | 18.6035 |
| 30      | 27.1443 | 30      |
| 12.3635 | 23.4169 | 30      |
| 30      | 24.5692 | 30      |
| 13.8337 | 17.4957 | 16.7022 |
| 19.0176 | 22.9513 | 30      |
| 18.0013 | 19.3048 | 30      |
| 18.9712 | 24.7669 | 30      |
| 17.5499 | 25.0071 | 30      |
| 17.0536 | 21.2058 | 30      |
| 15.8322 | 19.8235 | 16.7262 |
| 13.8138 | 22.4074 | 30      |
| 16.1506 | 19.2917 | 30      |
| 17.1692 | 30      | 30      |
| 30      | 19.9235 | 30      |
| 14.8414 | 19.8749 | 30      |
| 16.0482 | 21.9056 | 30      |
| 12.955  | 18.9783 | 30      |
| 17.1199 | 18.796  | 16.7287 |
| 15.6506 | 30      | 18.339  |
| 14.564  | 24.158  | 30      |
| 16.178  | 22.0273 | 30      |
| 19.7865 | 26.5593 | 30      |
| 14.8454 | 27.4908 | 30      |
| 19.2201 | 20.2908 | 17.2606 |
| 14.2204 | 18.4306 | 16.9697 |
| 18.1994 | 20.6826 | 30      |
| 15.5436 | 19.1707 | 18.6892 |
| 17.3411 | 18.6338 | 30      |
| 17.5666 | 22.944  | 16.304  |
| 30      | 23.8846 | 30      |
| 14.368  | 20.6302 | 30      |

|         |         |         |
|---------|---------|---------|
| 19.3508 | 24.4351 | 30      |
| 15.7543 | 17.8149 | 16.2739 |
| 27.1377 | 21.7985 | 30      |
| 19.005  | 19.3664 | 30      |
| 17.6187 | 23.0707 | 18.1434 |
| 13.3756 | 21.2279 | 30      |
| 17.317  | 22.6693 | 30      |
| 16.9367 | 24.5639 | 30      |
| 18.2991 | 20.4344 | 30      |
| 15.7632 | 19.1387 | 17.7972 |
| 30      | 22.3664 | 17.8816 |
| 30      | 21.1508 | 18.7283 |
| 15.7077 | 16.8166 | 16.1591 |
| 21.7062 | 22.7014 | 30      |
| 19.266  | 27.5215 | 30      |
| 22.193  | 30      | 30      |
| 17.241  | 22.9403 | 30      |
| 18.8916 | 22.6271 | 30      |
| 17.8286 | 20.486  | 27.1058 |
| 13.0034 | 26.4377 | 30      |
| 30      | 24.6893 | 30      |
| 15.0992 | 17.0248 | 18.372  |
| 16.0105 | 16.6585 | 18.5704 |
| 19.1748 | 19.9378 | 30      |
| 27.947  | 27.964  | 21.4296 |
| 30      | 30      | 26.2086 |
| 25.8936 | 27.6479 | 21.7592 |
| 16.5972 | 16.4116 | 26.0178 |
| 16.1248 | 15.9953 | 21.383  |
| 16.5302 | 16.4882 | 21.5568 |
| 17.1301 | 17.2348 | 24.0706 |
| 19.8183 | 19.7662 | 17.7585 |
| 14.4757 | 14.3458 | 16.6981 |
| 18.1993 | 18.0373 | 19.5068 |
| 30      | 30      | 21.4099 |
| 30      | 30      | 20.0495 |
| 17.2005 | 17.0829 | 22.1964 |
| 27.664  | 30      | 21.46   |
| 30      | 30      | 22.642  |
| 18.732  | 18.8052 | 22.0736 |
| 17.3136 | 17.2258 | 20.3041 |

|         |         |         |
|---------|---------|---------|
| 30      | 30      | 23.6163 |
| 19.4428 | 19.7376 | 17.8482 |
| 26.3667 | 26.347  | 23.9955 |
| 13.8502 | 13.9001 | 18.6898 |
| 14.0399 | 14.0093 | 22.1571 |
| 17.5235 | 17.5103 | 24.3417 |
| 30      | 30      | 19.0734 |
| 14.9315 | 14.9407 | 18.2348 |
| 15.5363 | 15.5572 | 30      |
| 30      | 30      | 22.1522 |



|         |         |         |
|---------|---------|---------|
| 30      | 30      | 30      |
| 30      | 30      | 17.5288 |
| 30      | 30      | 27.0997 |
| 30      | 30      | 30      |
| 30      | 30      | 16.9721 |
| 30      | 30      | 18.5488 |
| 30      | 30      | 30      |
| 30      | 30      | 30      |
| 30      | 25.5663 | 21.1905 |
| 30      | 30      | 14.9005 |
| 30      | 30      | 30      |
| 30      | 30      | 30      |
| 30      | 30      | 30      |
| 30      | 30      | 30      |
| 30      | 30      | 30      |
| 30      | 30      | 18.4014 |
| 30      | 30      | 30      |
| 30      | 30      | 30      |
| 30      | 30      | 30      |
| 30      | 30      | 30      |
| 30      | 30      | 30      |
| 27.8662 | 30      | 30      |
| 30      | 30      | 30      |
| 30      | 30      | 18.8726 |
| 30      | 30      | 30      |
| 30      | 30      | 30      |
| 18.4265 | 30      | 30      |
| 30      | 30      | 30      |
| 30      | 30      | 30      |
| 30      | 30      | 30      |
| 17.2775 | 30      | 30      |
| 30      | 30      | 30      |
| 18.3439 | 30      | 30      |
| 15.3916 | 30      | 30      |
| 30      | 30      | 30      |
| 30      | 30      | 30      |
| 30      | 30      | 30      |
| 30      | 30      | 30      |
| 30      | 30      | 30      |
| 30      | 30      | 30      |
| 30      | 25.5602 | 30      |
| 30      | 30      | 30      |
| 30      | 30      | 30      |

|         |         |        |
|---------|---------|--------|
| 18.8153 | 30      | 30     |
| 17.5551 | 30      | 30     |
| 22.176  | 30      | 30     |
| 20.0863 | 30      | 30     |
| 30      | 12.543  | 13.495 |
| 27.6736 | 30      | 30     |
| 30      | 30      | 30     |
| 17.978  | 17.2845 | 30     |
| 30      | 30      | 30     |
| 30      | 24.1039 | 30     |



Lrig1\_A20

Lyz2\_A32

Lyz2\_A44

|         |         |         |
|---------|---------|---------|
| 30      | 23.9278 | 16.5707 |
| 16.4417 | 26.4294 | 18.113  |
| 30      | 23.2917 | 18.4109 |
| 18.0781 | 23.1079 | 18.6358 |
| 30      | 22.2392 | 20.0947 |
| 30      | 24.3061 | 18.6992 |
| 30      | 22.5168 | 19.5152 |
| 30      | 22.5825 | 18.5259 |
| 30      | 22.9937 | 17.5706 |
| 30      | 23.4809 | 18.4482 |
| 21.2269 | 21.801  | 30      |
| 26.3827 | 23.225  | 18.4686 |
| 30      | 22.8469 | 30      |
| 30      | 22.0516 | 17.5756 |
| 30      | 22.7185 | 18.0061 |
| 30      | 21.7874 | 30      |
| 30      | 23.8994 | 18.2237 |
| 30      | 21.8552 | 17.9573 |
| 23.288  | 22.7108 | 30      |
| 25.7285 | 23.3956 | 30      |
| 30      | 21.3706 | 19.8522 |
| 23.8538 | 21.8571 | 17.8601 |
| 30      | 22.0094 | 26.4513 |
| 16.1404 | 21.0695 | 19.9289 |
| 13.7797 | 23.5589 | 18.0857 |
| 18.1239 | 24.1579 | 19.1362 |
| 17.3306 | 23.883  | 23.1568 |
| 16.8415 | 23.1124 | 18.8093 |
| 19.6796 | 24.4894 | 19.4325 |
| 30      | 22.76   | 18.4205 |
| 27.2993 | 23.4083 | 18.0057 |
| 16.8461 | 22.7842 | 30      |
| 30      | 21.6961 | 21.633  |
| 18.7133 | 23.9485 | 30      |
| 30      | 21.7934 | 20.0382 |
| 17.551  | 23.6833 | 20.2208 |
| 30      | 23.0771 | 23.0206 |
| 16.3658 | 23.9864 | 18.6536 |
| 30      | 21.0265 | 18.1053 |
| 16.3787 | 22.6163 | 20.0617 |

|         |         |         |
|---------|---------|---------|
| 30      | 23.8652 | 17.2603 |
| 18.9029 | 22.4345 | 17.7277 |
| 30      | 21.5443 | 23.8603 |
| 30      | 20.8303 | 30      |
| 18.413  | 22.9398 | 17.2485 |
| 24.9882 | 19.0117 | 17.9284 |
| 30      | 24.0509 | 18.9675 |
| 30      | 22.196  | 18.6667 |
| 23.4786 | 23.6141 | 17.7158 |
| 14.6264 | 20.6604 | 19.1267 |
| 30      | 23.8258 | 17.8792 |
| 30      | 21.6153 | 17.0831 |
| 30      | 21.4141 | 20.8797 |
| 30      | 23.3964 | 16.4725 |
| 30      | 21.1437 | 19.575  |
| 30      | 20.7683 | 17.4238 |
| 30      | 21.5379 | 17.7947 |
| 30      | 21.9874 | 18.7103 |
| 30      | 22.9908 | 18.0172 |
| 18.7309 | 23.191  | 19.4484 |
| 30      | 24.8731 | 18.0022 |
| 30      | 21.5365 | 30      |
| 18.5704 | 24.2311 | 18.4381 |
| 18.5082 | 22.341  | 19.8828 |
| 30      | 30      | 22.5398 |
| 30      | 30      | 22.34   |
| 30      | 30      | 21.5748 |
| 17.4326 | 18.6312 | 20.6111 |
| 18.0184 | 17.4437 | 21.1565 |
| 26.4991 | 30      | 18.3504 |
| 15.2094 | 15.3501 | 21.4991 |
| 18.495  | 30      | 20.6147 |
| 15.1401 | 15.6557 | 20.7794 |
| 25.9868 | 30      | 21.0538 |
| 30      | 30      | 19.9493 |
| 30      | 30      | 21.024  |
| 30      | 30      | 22.3881 |
| 30      | 30      | 20.6441 |
| 30      | 30      | 23.2807 |
| 30      | 23.3828 | 11.9917 |
| 30      | 30      | 18.6232 |

|         |         |         |
|---------|---------|---------|
| 30      | 30      | 21.6819 |
| 15.4794 | 16.5347 | 21.3123 |
| 30      | 30      | 21.3024 |
| 15.4759 | 16.3769 | 21.5428 |
| 14.6809 | 12.8893 | 18.054  |
| 30      | 30      | 22.473  |
| 30      | 30      | 21.3569 |
| 30      | 30      | 21.8685 |
| 18.2495 | 19.0909 | 21.4807 |
| 30      | 30      | 21.7468 |

Msi1\_A56

Msi1\_A68

Msi2\_A80

|         |         |         |
|---------|---------|---------|
| 30      | 30      | 30      |
| 30      | 30      | 16.7685 |
| 30      | 27.9855 | 30      |
| 30      | 24.8001 | 16.5332 |
| 30      | 30      | 30      |
| 30      | 21.7565 | 30      |
| 30      | 30      | 30      |
| 13.3127 | 17.5098 | 13.7562 |
| 30      | 30      | 30      |
| 30      | 30      | 16.5537 |
| 15.0506 | 19.9411 | 13.0202 |
| 30      | 30      | 30      |
| 30      | 30      | 17.5129 |
| 30      | 24.8597 | 30      |
| 30      | 30      | 30      |
| 30      | 30      | 30      |
| 30      | 30      | 30      |
| 30      | 30      | 30      |
| 30      | 30      | 30      |
| 30      | 30      | 18.248  |
| 15.4523 | 30      | 15.0804 |
| 30      | 30      | 30      |
| 30      | 30      | 30      |
| 30      | 30      | 30      |
| 30      | 30      | 17.1156 |
| 30      | 30      | 30      |
| 30      | 30      | 17.1204 |
| 30      | 26.7679 | 17.4555 |
| 30      | 30      | 15.5539 |
| 15.8451 | 17.4665 | 16.6498 |
| 30      | 25.872  | 18.369  |
| 30      | 30      | 30      |
| 30      | 30      | 18.7642 |
| 30      | 30      | 30      |
| 30      | 22.9896 | 30      |
| 30      | 30      | 30      |
| 30      | 30      | 16.8415 |
| 30      | 30      | 18.3309 |
| 30      | 30      | 15.8104 |
| 30      | 26.1768 | 30      |
| 30      | 30      | 17.46   |

|         |         |         |
|---------|---------|---------|
| 30      | 30      | 30      |
| 30      | 30      | 17.6784 |
| 30      | 30      | 30      |
| 30      | 30      | 18.0649 |
| 30      | 21.9962 | 16.7626 |
| 14.8862 | 18.8179 | 16.2308 |
| 30      | 30      | 30      |
| 30      | 30      | 30      |
| 30      | 30      | 30      |
| 30      | 30      | 15.9726 |
| 30      | 30      | 30      |
| 30      | 30      | 18.6652 |
| 30      | 30      | 16.0421 |
| 30      | 30      | 30      |
| 30      | 30      | 30      |
| 30      | 30      | 30      |
| 30      | 30      | 30      |
| 30      | 30      | 30      |
| 15.7869 | 18.2449 | 15.3409 |
| 30      | 30      | 30      |
| 30      | 30      | 30      |
| 30      | 30      | 18.5572 |
| 30      | 30      | 17.4183 |
| 16.7798 | 30      | 30      |
| 18.5013 | 30      | 30      |
| 17.9583 | 30      | 30      |
| 25.8748 | 30      | 30      |
| 18.5321 | 30      | 30      |
| 16.8757 | 30      | 30      |
| 18.9227 | 30      | 30      |
| 18.0012 | 30      | 30      |
| 18.2102 | 30      | 30      |
| 30      | 30      | 30      |
| 25.9    | 30      | 30      |
| 17.8957 | 30      | 30      |
| 20.9399 | 30      | 30      |
| 17.0604 | 30      | 30      |
| 24.4516 | 30      | 30      |
| 12.0789 | 28.5637 | 30      |
| 20.505  | 30      | 30      |

|         |         |         |
|---------|---------|---------|
| 20.6738 | 30      | 30      |
| 19.0611 | 30      | 30      |
| 22.9808 | 30      | 30      |
| 27.2609 | 15.2863 | 17.6182 |
| 17.2157 | 15.1828 | 17.6335 |
| 17.3672 | 30      | 30      |
| 18.2375 | 30      | 30      |
| 21.0843 | 30      | 30      |
| 19.5167 | 30      | 30      |
| 17.7975 | 30      | 30      |

**Msi2\_A92****Myb\_A09****Myb\_A21**

|         |         |         |
|---------|---------|---------|
| 30      | 30      | 30      |
| 17.5067 | 30      | 26.0163 |
| 20.2352 | 30      | 30      |
| 18.6747 | 30      | 30      |
| 17.2601 | 30      | 30      |
| 30      | 30      | 30      |
| 24.1087 | 30      | 30      |
| 15.3171 | 17.4613 | 18.6335 |
| 25.6357 | 30      | 30      |
| 22.3367 | 30      | 30      |
| 14.2106 | 18.2385 | 30      |
| 20.4738 | 30      | 30      |
| 24.7713 | 30      | 30      |
| 21.2281 | 30      | 30      |
| 30      | 30      | 23.7847 |
| 30      | 30      | 27.4676 |
| 30      | 18.9015 | 30      |
| 28.2609 | 30      | 26.7737 |
| 18.5934 | 30      | 30      |
| 16.1932 | 30      | 30      |
| 18.6839 | 30      | 27.2949 |
| 30      | 30      | 30      |
| 30      | 30      | 30      |
| 17.8235 | 30      | 21.9985 |
| 18.7649 | 30      | 30      |
| 22.997  | 30      | 26.2738 |
| 19.3383 | 30      | 24.4988 |
| 16.4745 | 30      | 21.9644 |
| 17.3719 | 19.4805 | 26.3553 |
| 17.9183 | 30      | 30      |
| 30      | 30      | 23.1571 |
| 30      | 30      | 27.0831 |
| 25.7854 | 30      | 30      |
| 25.7291 | 30      | 27.8866 |
| 27.1758 | 30      | 30      |
| 16.6922 | 30      | 30      |
| 19.0841 | 30      | 30      |
| 16.2522 | 30      | 30      |
| 30      | 30      | 26.7434 |
| 27.1163 | 30      | 30      |

|         |         |         |
|---------|---------|---------|
| 30      | 30      | 22.0253 |
| 18.6536 | 30      | 25.1732 |
| 26.9996 | 30      | 30      |
| 16.6988 | 30      | 30      |
| 20.6694 | 30      | 30      |
| 17.2886 | 30      | 30      |
| 30      | 30      | 30      |
| 30      | 30      | 30      |
| 30      | 30      | 30      |
| 16.9083 | 30      | 30      |
| 24.4749 | 30      | 23.2533 |
| 30      | 30      | 26.2473 |
| 17.6379 | 30      | 30      |
| 30      | 30      | 23.0824 |
| 25.499  | 30      | 30      |
| 18.1449 | 30      | 30      |
| 18.7314 | 30      | 27.4867 |
| 30      | 30      | 30      |
| 26.0592 | 30      | 25.9343 |
| 14.6406 | 30      | 30      |
| 30      | 30      | 30      |
| 30      | 30      | 30      |
| 19.6574 | 30      | 26.9499 |
| 24.9716 | 30      | 30      |
| 18.6431 | 20.4798 | 30      |
| 30      | 27.1805 | 30      |
| 18.3429 | 20.6827 | 30      |
| 16.843  | 19.2789 | 30      |
| 18.5455 | 20.3521 | 18.2917 |
| 18.1612 | 25.5374 | 30      |
| 15.4439 | 17.2158 | 30      |
| 30      | 20.9918 | 30      |
| 15.1788 | 16.9739 | 14.0561 |
| 30      | 19.7468 | 30      |
| 18.3123 | 21.2008 | 30      |
| 30      | 25.642  | 30      |
| 18.1661 | 18.7119 | 26.7381 |
| 18.4446 | 30      | 30      |
| 30      | 19.4707 | 30      |
| 17.4713 | 17.7526 | 16.4958 |
| 30      | 23.94   | 30      |



|         |         |         |
|---------|---------|---------|
| 18.5598 | 27.2671 | 30      |
| 15.8538 | 16.4718 | 17.2019 |
| 30      | 25.6963 | 30      |
| 15.9889 | 17.3798 | 13.1868 |
| 16.2159 | 17.186  | 14.5724 |
| 21.4374 | 18.8476 | 27.2163 |
| 25.2229 | 21.7704 | 30      |
| 18.0031 | 18.6816 | 18.321  |
| 17.5448 | 19.5621 | 30      |
| 18.5301 | 22.7741 | 30      |

**Myc\_A33****Myc\_A45****Notch1\_A57**

|         |    |         |
|---------|----|---------|
| 30      | 30 | 21.7764 |
| 30      | 30 | 20.923  |
| 30      | 30 | 21.4782 |
| 30      | 30 | 21.0057 |
| 30      | 30 | 19.124  |
| 30      | 30 | 16.7455 |
| 30      | 30 | 23.0659 |
| 30      | 30 | 25.6428 |
| 30      | 30 | 20.556  |
| 30      | 30 | 19.8322 |
| 30      | 30 | 19.4203 |
| 30      | 30 | 18.1351 |
| 30      | 30 | 19.9571 |
| 30      | 30 | 18.0402 |
| 30      | 30 | 19.215  |
| 30      | 30 | 20.5637 |
| 26.6465 | 30 | 18.5608 |
| 30      | 30 | 17.4764 |
| 30      | 30 | 21.2317 |
| 30      | 30 | 21.9206 |
| 30      | 30 | 21.0486 |
| 30      | 30 | 20.2311 |
| 30      | 30 | 18.4181 |
| 30      | 30 | 18.9118 |
| 30      | 30 | 21.2587 |
| 30      | 30 | 20.5691 |
| 30      | 30 | 21.9225 |
| 30      | 30 | 17.8149 |
| 21.4189 | 30 | 22.0908 |
| 30      | 30 | 20.9708 |
| 30      | 30 | 24.9274 |
| 30      | 30 | 19.5861 |
| 30      | 30 | 20.9094 |
| 30      | 30 | 23.4636 |
| 30      | 30 | 20.8191 |
| 27.4749 | 30 | 15.9329 |
| 30      | 30 | 18.7401 |
| 30      | 30 | 16.8952 |
| 30      | 30 | 17.62   |
| 30      | 30 | 16.3066 |

|         |         |         |
|---------|---------|---------|
| 30      | 30      | 24.6093 |
| 30      | 30      | 16.1133 |
| 30      | 30      | 19.0462 |
| 30      | 30      | 17.2481 |
| 30      | 30      | 17.7699 |
| 30      | 30      | 17.3711 |
| 30      | 30      | 17.6705 |
| 30      | 30      | 18.4678 |
| 30      | 30      | 15.9817 |
| 30      | 30      | 17.4284 |
| 30      | 30      | 16.7822 |
| 30      | 30      | 18.1807 |
| 30      | 30      | 23.9628 |
| 30      | 30      | 16.3707 |
| 30      | 30      | 16.0154 |
| 30      | 30      | 17.1676 |
| 30      | 30      | 17.2237 |
| 30      | 30      | 16.2632 |
| 30      | 30      | 17.8363 |
| 30      | 30      | 18.8075 |
| 30      | 30      | 15.7595 |
| 30      | 30      | 15.0455 |
| 30      | 30      | 23.0604 |
| 30      | 30      | 19.8819 |
| 18.6408 | 18.3067 | 19.1199 |
| 17.8474 | 30      | 30      |
| 30      | 30      | 18.0672 |
| 23.9127 | 16.0115 | 16.0323 |
| 30      | 30      | 30      |
| 21.4563 | 30      | 30      |
| 30      | 13.911  | 14.9059 |
| 30      | 18.2347 | 30      |
| 13.6831 | 14.604  | 14.6153 |
| 30      | 30      | 30      |
| 18.6664 | 30      | 30      |
| 30      | 30      | 30      |
| 26.9927 | 17.0639 | 18.5753 |
| 30      | 30      | 30      |
| 19.2982 | 18.0009 | 30      |
| 17.5347 | 18.0877 | 30      |
| 30      | 30      | 30      |

|         |         |         |
|---------|---------|---------|
| 30      | 30      | 30      |
| 15.9461 | 17.9847 | 30      |
| 27.5096 | 30      | 30      |
| 13.6424 | 13.1588 | 13.6691 |
| 14.1929 | 12.8202 | 14.1788 |
| 30      | 30      | 30      |
| 30      | 30      | 30      |
| 18.2883 | 30      | 30      |
| 26.8059 | 15.8141 | 16.3826 |
| 30      | 30      | 30      |

Notch1\_A69

Numb\_A81

Numb\_A93

|         |         |         |
|---------|---------|---------|
| 30      | 16.7035 | 14.3119 |
| 30      | 16.5229 | 14.2633 |
| 30      | 23.6299 | 15.6596 |
| 30      | 16.9711 | 14.5417 |
| 30      | 17.1819 | 15.8959 |
| 30      | 17.3741 | 14.7389 |
| 30      | 17.1432 | 16.5401 |
| 30      | 18.4732 | 15.0981 |
| 30      | 18.0046 | 15.2533 |
| 30      | 18.2952 | 16.7144 |
| 18.1823 | 18.7175 | 15.9661 |
| 30      | 18.2084 | 15.285  |
| 30      | 15.2267 | 14.7853 |
| 30      | 18.713  | 15.2165 |
| 30      | 30      | 15.8526 |
| 30      | 22.3247 | 16.3619 |
| 30      | 16.2023 | 14.5965 |
| 30      | 15.1122 | 13.7996 |
| 30      | 16.9488 | 16.1379 |
| 30      | 17.9291 | 16.6816 |
| 30      | 17.3973 | 15.3283 |
| 30      | 16.9749 | 16.05   |
| 30      | 19.0892 | 16.3224 |
| 30      | 16.0424 | 13.6649 |
| 30      | 17.2355 | 14.3238 |
| 30      | 16.0516 | 13.5118 |
| 30      | 14.6927 | 12.862  |
| 30      | 16.6653 | 14.5148 |
| 30      | 30      | 30      |
| 30      | 16.5029 | 14.4858 |
| 30      | 18.1451 | 14.784  |
| 30      | 16.9337 | 14.4378 |
| 30      | 18.1723 | 16.8458 |
| 30      | 15.5518 | 14.6422 |
| 30      | 19.1667 | 15.2965 |
| 30      | 15.4078 | 14.0845 |
| 30      | 15.8013 | 14.6333 |
| 30      | 16.5114 | 15.0181 |
| 30      | 16.7829 | 15.6933 |
| 30      | 15.3734 | 14.4173 |

|         |         |         |
|---------|---------|---------|
| 30      | 20.8875 | 17.0771 |
| 18.3268 | 15.3547 | 13.8247 |
| 30      | 17.1406 | 15.2347 |
| 30      | 18.6329 | 16.0406 |
| 30      | 15.3113 | 14.2272 |
| 16.746  | 21.0059 | 17.662  |
| 30      | 17.2279 | 15.1462 |
| 30      | 13.9958 | 12.794  |
| 30      | 16.5179 | 14.7936 |
| 30      | 15.69   | 14.7656 |
| 30      | 18.1502 | 17.7827 |
| 30      | 16.3505 | 15.4735 |
| 30      | 14.6571 | 12.7253 |
| 30      | 18.421  | 17.6685 |
| 30      | 17.917  | 17.075  |
| 30      | 19.0549 | 15.7985 |
| 30      | 19.8191 | 13.9675 |
| 30      | 16.6003 | 15.4356 |
| 30      | 16.3727 | 15.9688 |
| 18.2963 | 18.9885 | 15.8497 |
| 30      | 30      | 15.1064 |
| 30      | 17.2617 | 14.046  |
| 30      | 15.9263 | 14.3853 |
| 30      | 15.5678 | 13.6549 |
| 22.8769 | 30      | 19.6193 |
| 20.8077 | 30      | 16.2254 |
| 17.9492 | 30      | 16.8458 |
| 19.6387 | 30      | 17.9862 |
| 17.7918 | 30      | 13.3921 |
| 16.5211 | 30      | 17.7889 |
| 16.5353 | 30      | 14.9495 |
| 17.3345 | 19.7458 | 16.4037 |
| 16.2788 | 16.6647 | 15.9085 |
| 16.9715 | 30      | 18.5382 |
| 18.1344 | 30      | 30      |
| 19.8377 | 30      | 16.6142 |
| 23.3727 | 30      | 14.5793 |
| 18.3602 | 30      | 15.0137 |
| 20.9085 | 30      | 18.0845 |
| 22.7977 | 30      | 18.0668 |
| 17.8296 | 30      | 16.9813 |

|         |         |         |
|---------|---------|---------|
| 20.2148 | 30      | 17.8624 |
| 14.5102 | 30      | 15.8555 |
| 17.3485 | 30      | 18.0842 |
| 13.9261 | 17.5575 | 19.3124 |
| 15.4081 | 16.9728 | 17.2641 |
| 16.0959 | 30      | 16.1355 |
| 12.9356 | 30      | 27.0448 |
| 15.3273 | 30      | 15.4387 |
| 16.2182 | 30      | 15.9942 |
| 14.2027 | 30      | 15.9305 |

**Olfm4\_A10****Olfm4\_A22****Pcna\_A34**

|         |         |         |
|---------|---------|---------|
| 18.7537 | 19.273  | 17.1226 |
| 30      | 30      | 15.9128 |
| 18.9389 | 30      | 17.6415 |
| 30      | 22.0556 | 17.3227 |
| 30      | 30      | 19.2792 |
| 18.6961 | 30      | 15.7189 |
| 30      | 30      | 16.5274 |
| 18.6908 | 21.5512 | 16.3127 |
| 30      | 30      | 17.1816 |
| 30      | 20.2962 | 15.6219 |
| 18.8283 | 17.5018 | 15.2516 |
| 30      | 30      | 16.373  |
| 30      | 19.9954 | 15.7871 |
| 30      | 22.7295 | 21.5749 |
| 30      | 30      | 16.3613 |
| 30      | 23.8636 | 16.8278 |
| 30      | 19.1484 | 16.7212 |
| 30      | 20.2343 | 15.9493 |
| 30      | 30      | 15.9684 |
| 30      | 17.4567 | 17.1541 |
| 30      | 30      | 19.2314 |
| 30      | 30      | 16.0504 |
| 30      | 30      | 18.5822 |
| 30      | 30      | 15.4267 |
| 17.2555 | 20.1642 | 16.2271 |
| 30      | 17.7268 | 17.8249 |
| 30      | 21.8264 | 15.4433 |
| 30      | 30      | 14.9523 |
| 30      | 30      | 20.0731 |
| 30      | 30      | 15.0115 |
| 30      | 30      | 16.6565 |
| 30      | 18.9188 | 15.1501 |
| 19.6135 | 30      | 18.9189 |
| 30      | 30      | 16.258  |
| 19.7077 | 30      | 16.975  |
| 30      | 23.1915 | 14.6611 |
| 30      | 30      | 16.2338 |
| 30      | 25.9325 | 14.789  |
| 18.5658 | 30      | 16.9226 |
| 30      | 19.7145 | 16.0374 |



|         |         |         |
|---------|---------|---------|
| 30      | 19.1735 | 18.3952 |
| 30      | 30      | 16.5941 |
| 30      | 30      | 17.6061 |
| 30      | 30      | 15.5501 |
| 30      | 30      | 15.2307 |
| 30      | 19.2251 | 16.3856 |
| 30      | 30      | 16.336  |
| 30      | 23.3021 | 14.9336 |
| 30      | 30      | 15.4814 |
| 30      | 18.1491 | 14.8948 |
| 30      | 30      | 16.7429 |
| 17.3672 | 25.5876 | 17.8216 |
| 18.4403 | 19.2728 | 15.0025 |
| 18.3757 | 30      | 18.2407 |
| 30      | 30      | 17.5524 |
| 30      | 22.5354 | 19.0332 |
| 30      | 23.0404 | 17.6118 |
| 30      | 19.3056 | 17.5227 |
| 30      | 22.8364 | 16.6019 |
| 30      | 17.974  | 15.8834 |
| 30      | 30      | 18.828  |
| 30      | 24.3452 | 15.6973 |
| 30      | 23.1971 | 15.7007 |
| 17.5719 | 18.7321 | 16.3651 |
| 17.2096 | 16.2831 | 16.7011 |
| 15.6977 | 16.4033 | 16.2407 |
| 14.9818 | 17.9027 | 15.4811 |
| 15.8842 | 30      | 20.5171 |
| 13.221  | 16.7453 | 15.7842 |
| 13.5308 | 16.1158 | 15.5365 |
| 14.4091 | 30      | 14.6437 |
| 15.1204 | 27.2651 | 15.4525 |
| 15.3179 | 17.566  | 15.2306 |
| 18.6217 | 20.0147 | 17.6206 |
| 17.3402 | 17.9407 | 15.8472 |
| 14.9216 | 30      | 15.8232 |
| 14.0277 | 17.0328 | 14.5616 |
| 14.5796 | 18.254  | 14.682  |
| 16.2477 | 16.7359 | 15.3759 |
| 19.7048 | 30      | 17.4175 |
| 17.3057 | 17.8449 | 20.9274 |

|         |         |         |
|---------|---------|---------|
| 17.0378 | 30      | 17.1814 |
| 14.0478 | 17.8476 | 14.2405 |
| 15.4388 | 30      | 15.6049 |
| 18.5442 | 11.57   | 13.8419 |
| 16.6383 | 9.05979 | 14.239  |
| 15.2816 | 18.7116 | 15.8751 |
| 17.6283 | 30      | 17.861  |
| 14.2907 | 19.0164 | 15.7934 |
| 13.9098 | 15.7486 | 15.7062 |
| 15.2117 | 18.9079 | 16.2579 |

**Pcna\_A46****Ppargc1b\_A58****Ppargc1b\_A70**

|         |         |         |
|---------|---------|---------|
| 15.9165 | 16.0732 | 14.222  |
| 14.1785 | 16.1965 | 14.225  |
| 17.5415 | 30      | 15.0619 |
| 14.9174 | 15.3988 | 13.6526 |
| 17.0976 | 30      | 25.8022 |
| 15.2486 | 19.3033 | 17.553  |
| 15.3898 | 18.1223 | 14.238  |
| 14.8647 | 18.433  | 30      |
| 15.4683 | 15.3509 | 13.3348 |
| 14.8563 | 17.1329 | 17.7536 |
| 14.6138 | 30      | 30      |
| 16.4075 | 18.1798 | 14.1969 |
| 13.6198 | 14.3796 | 13.466  |
| 16.3547 | 30      | 30      |
| 16.5508 | 18.5576 | 14.6153 |
| 15.9303 | 17.6863 | 17.6933 |
| 13.8307 | 15.7775 | 12.9272 |
| 13.9077 | 14.8563 | 13.4201 |
| 14.1514 | 17.2376 | 15.7138 |
| 17.9805 | 30      | 17.0884 |
| 15.3275 | 16.7195 | 14.5326 |
| 17.7277 | 30      | 15.2228 |
| 15.4708 | 30      | 22.2169 |
| 15.121  | 15.8701 | 14.0059 |
| 14.5963 | 16.0952 | 13.8121 |
| 14.5796 | 15.834  | 13.6302 |
| 15.218  | 14.5628 | 13.6761 |
| 14.9235 | 15.5695 | 14.4603 |
| 18.8257 | 30      | 30      |
| 13.6898 | 16.4673 | 15.3666 |
| 15.3076 | 15.8957 | 14.0917 |
| 14.084  | 16.306  | 14.2993 |
| 15.9394 | 30      | 17.2164 |
| 16.2812 | 15.8617 | 13.9629 |
| 15.3012 | 17.3793 | 15.705  |
| 14.1626 | 15.1998 | 13.9103 |
| 16.0535 | 14.9054 | 14.5071 |
| 13.0949 | 15.1891 | 12.888  |
| 17.8568 | 17.4577 | 15.0288 |
| 14.5869 | 13.8166 | 12.5657 |

|         |         |         |
|---------|---------|---------|
| 15.3701 | 18.2457 | 14.9008 |
| 15.0958 | 15.5036 | 14.8491 |
| 16.5327 | 16.9097 | 14.5316 |
| 13.9012 | 30      | 30      |
| 14.3558 | 15.4501 | 12.9572 |
| 15.9641 | 17.308  | 17.5775 |
| 17.521  | 15.583  | 15.999  |
| 13.415  | 16.177  | 14.3905 |
| 13.8725 | 17.499  | 18.0736 |
| 14.3815 | 14.924  | 14.0753 |
| 30      | 16.2391 | 14.7552 |
| 16.3524 | 30      | 19.1065 |
| 13.6851 | 14.0919 | 13.2805 |
| 18.0145 | 30      | 30      |
| 18.1227 | 17.3743 | 15.9225 |
| 17.9315 | 30      | 17.8002 |
| 16.0622 | 15.8425 | 14.0535 |
| 16.1966 | 18.3942 | 15.1888 |
| 16.3407 | 19.5752 | 17.4324 |
| 14.3345 | 30      | 30      |
| 16.8617 | 30      | 30      |
| 15.0349 | 16.0441 | 13.166  |
| 13.8244 | 15.9361 | 15.2925 |
| 14.4305 | 16.4049 | 14.626  |
| 16.1922 | 17.6676 | 16.5162 |
| 14.9958 | 18.5821 | 18.0821 |
| 15.4617 | 16.1488 | 13.3213 |
| 17.1413 | 18.3803 | 16.7146 |
| 14.1849 | 14.3647 | 12.7971 |
| 17.0849 | 25.9242 | 17.3938 |
| 13.6629 | 14.5263 | 12.6333 |
| 14.1823 | 18.489  | 17.8634 |
| 14.0574 | 15.8507 | 13.3754 |
| 17.7362 | 30      | 26.3344 |
| 16.429  | 17.7275 | 16.0056 |
| 15.7232 | 17.3799 | 16.9828 |
| 13.7353 | 14.7264 | 14.7062 |
| 14.2027 | 18.0732 | 15.6652 |
| 15.1143 | 18.4249 | 30      |
| 17.4396 | 30      | 18.2089 |
| 18.6824 | 30      | 15.2596 |

|         |         |         |
|---------|---------|---------|
| 16.0872 | 16.8799 | 30      |
| 13.6007 | 17.185  | 15.6942 |
| 16.2799 | 30      | 30      |
| 13.8109 | 18.4719 | 14.891  |
| 13.8598 | 18.3943 | 16.0166 |
| 16.9997 | 16.8325 | 16.0801 |
| 16.0657 | 30      | 18.1259 |
| 13.9114 | 14.535  | 13.6753 |
| 14.0919 | 18.232  | 14.1702 |
| 15.4083 | 16.4507 | 16.6107 |

Rhoa\_A82

Rhoa\_A94

Saa2\_A11

|         |         |         |
|---------|---------|---------|
| 13.2221 | 13.9562 | 21.1749 |
| 11.9494 | 13.8645 | 30      |
| 13.1956 | 14.8519 | 22.4678 |
| 12.1462 | 14.2131 | 30      |
| 13.7154 | 15.3306 | 21.3419 |
| 13.4481 | 15.4494 | 25.3789 |
| 13.8701 | 14.1347 | 25.4379 |
| 12.1287 | 13.3011 | 30      |
| 13.1556 | 14.267  | 21.7003 |
| 13.4554 | 13.7936 | 19.9544 |
| 11.8809 | 12.7621 | 30      |
| 13.4807 | 15.0519 | 21.6775 |
| 11.2691 | 13.6184 | 21.1165 |
| 14.1385 | 14.2998 | 19.3202 |
| 13.7864 | 15.3463 | 20.3952 |
| 16.6294 | 15.6973 | 20.8658 |
| 12.4371 | 14.6553 | 30      |
| 12.0885 | 13.8698 | 22.1789 |
| 13.1324 | 14.126  | 23.2137 |
| 13.4159 | 14.1856 | 30      |
| 14.1422 | 15.7004 | 30      |
| 14.1975 | 14.1474 | 30      |
| 13.3943 | 14.8487 | 21.8975 |
| 12.0539 | 14.1352 | 30      |
| 11.7689 | 12.9828 | 30      |
| 11.7518 | 13.8244 | 30      |
| 12.2331 | 13.5376 | 30      |
| 13.0235 | 14.7846 | 23.1208 |
| 14.2555 | 15.1013 | 30      |
| 11.7402 | 13.4599 | 30      |
| 13.3938 | 13.9642 | 30      |
| 12.6152 | 13.5768 | 30      |
| 16.0431 | 17.0033 | 30      |
| 12.5663 | 13.8051 | 21.6533 |
| 13.563  | 14.9698 | 30      |
| 11.6586 | 14.1417 | 21.1765 |
| 12.864  | 14.5117 | 21.7512 |
| 11.5868 | 13.805  | 19.6337 |
| 13.6504 | 14.8523 | 27.0275 |
| 11.3681 | 13.299  | 20.6186 |

|         |         |         |
|---------|---------|---------|
| 13.8656 | 16.2215 | 21.4258 |
| 12.3597 | 13.8379 | 25.9881 |
| 14.4025 | 13.5967 | 23.3133 |
| 13.4178 | 15.3143 | 17.5874 |
| 12.0846 | 13.9056 | 23.5625 |
| 12.9322 | 14.0805 | 21.8361 |
| 14.493  | 16.4203 | 20.9889 |
| 11.625  | 13.3399 | 30      |
| 13.0656 | 14.4563 | 19.563  |
| 12.0231 | 13.8437 | 30      |
| 14.4914 | 15.1615 | 24.9585 |
| 14.1746 | 15.3249 | 20.3813 |
| 11.6075 | 13.2229 | 30      |
| 14.9694 | 14.6274 | 21.0639 |
| 14.0094 | 13.4369 | 24.8603 |
| 14.8023 | 15.0932 | 20.2396 |
| 12.8219 | 13.476  | 22.1894 |
| 12.5626 | 14.4081 | 20.9449 |
| 14.0294 | 14.6426 | 30      |
| 13.5287 | 14.1843 | 21.8163 |
| 13.3346 | 14.1961 | 30      |
| 11.9008 | 13.9    | 23.1433 |
| 12.3365 | 13.5801 | 30      |
| 12.609  | 13.3613 | 30      |
| 14.5723 | 15.328  | 30      |
| 13.7255 | 13.9223 | 30      |
| 12.6012 | 13.6289 | 18.7822 |
| 12.1981 | 14.0767 | 20.2461 |
| 11.7348 | 12.8631 | 23.8891 |
| 12.7333 | 14.3657 | 30      |
| 12.0161 | 13.1423 | 21.7475 |
| 12.6628 | 13.9062 | 21.9271 |
| 11.5419 | 12.2182 | 30      |
| 14.9114 | 15.852  | 30      |
| 14.2001 | 15.6441 | 24.0029 |
| 13.7075 | 14.0542 | 18.9374 |
| 12.0776 | 12.7078 | 25.086  |
| 12.1989 | 12.8127 | 18.8214 |
| 14.091  | 14.6199 | 30      |
| 14.0199 | 15.2295 | 30      |
| 14.3527 | 16.3568 | 30      |

|         |         |         |
|---------|---------|---------|
| 13.8196 | 14.3993 | 18.8772 |
| 11.9166 | 12.9169 | 19.2074 |
| 14.3394 | 14.3403 | 23.0387 |
| 12.8835 | 13.9347 | 17.8348 |
| 13.4647 | 14.1894 | 30      |
| 14.1744 | 14.127  | 18.5835 |
| 14.6714 | 15.3526 | 21.8061 |
| 12.0049 | 13.6879 | 19.9938 |
| 13.2008 | 13.7938 | 30      |
| 15.5089 | 14.9588 | 30      |



**Saa2\_A23****Sirt3\_A35****Sirt3\_A47**

|         |         |         |
|---------|---------|---------|
| 15.7378 | 30      | 18.5028 |
| 18.9714 | 17.1094 | 15.803  |
| 18.7842 | 18.8152 | 17.9208 |
| 30      | 18.4086 | 19.0814 |
| 17.6361 | 19.6978 | 20.341  |
| 16.2267 | 19.0645 | 17.1751 |
| 26.3117 | 30      | 18.2551 |
| 30      | 18.2738 | 16.905  |
| 16.5056 | 22.0144 | 30      |
| 16.8952 | 17.6207 | 15.7857 |
| 17.786  | 30      | 30      |
| 17.6283 | 20.8197 | 18.357  |
| 16.9494 | 15.3618 | 15.5456 |
| 16.5431 | 18.9828 | 20.8939 |
| 17.6454 | 30      | 30      |
| 16.8215 | 30      | 30      |
| 18.8483 | 17.0098 | 21.3037 |
| 21.6501 | 16.7356 | 17.7054 |
| 26.181  | 17.6676 | 30      |
| 20.3064 | 30      | 26.0793 |
| 18.8111 | 19.0186 | 30      |
| 23.6912 | 18.6479 | 18.2903 |
| 17.1676 | 26.4659 | 30      |
| 30      | 16.4435 | 15.0595 |
| 17.318  | 16.2984 | 15.485  |
| 19.3535 | 16.7073 | 15.7222 |
| 30      | 16.3395 | 16.9589 |
| 22.0471 | 16.5815 | 15.7046 |
| 18.7154 | 26.1178 | 17.1861 |
| 21.6245 | 15.8041 | 15.0624 |
| 22.0034 | 22.7163 | 16.9109 |
| 30      | 18.5601 | 17.331  |
| 17.9367 | 30      | 18.5204 |
| 18.7795 | 15.4124 | 14.894  |
| 21.6011 | 30      | 18.6592 |
| 18.7183 | 17.6506 | 17.7253 |
| 25.4461 | 20.042  | 17.4238 |
| 17.6446 | 21.988  | 16.2559 |
| 18.658  | 19.3851 | 18.5758 |
| 18.9353 | 16.4023 | 15.9508 |

|         |         |         |
|---------|---------|---------|
| 16.1281 | 18.4827 | 30      |
| 18.3169 | 16.7865 | 16.8947 |
| 17.829  | 30      | 18.498  |
| 16.3928 | 30      | 30      |
| 17.1011 | 15.7233 | 15.607  |
| 18.3007 | 30      | 18.6826 |
| 19.4693 | 24.0502 | 19.7859 |
| 18.6011 | 17.438  | 17.345  |
| 18.1981 | 18.8231 | 18.2274 |
| 30      | 30      | 16.1039 |
| 23.1781 | 30      | 30      |
| 15.3792 | 30      | 16.8535 |
| 17.2578 | 17.2356 | 20.8281 |
| 16.0863 | 21.727  | 30      |
| 18.6453 | 20.6915 | 15.9502 |
| 16.2308 | 18.8224 | 17.5601 |
| 17.2051 | 18.493  | 16.5811 |
| 18.782  | 17.961  | 17.6372 |
| 17.8379 | 25.7476 | 30      |
| 17.7301 | 30      | 30      |
| 21.6204 | 21.9561 | 30      |
| 17.7441 | 18.0769 | 19.4252 |
| 17.9583 | 17.4769 | 16.7114 |
| 18.6555 | 16.7683 | 16.0068 |
| 19.0155 | 25.5599 | 30      |
| 15.9914 | 30      | 17.9457 |
| 16.4046 | 18.1753 | 16.3571 |
| 22.2309 | 17.1691 | 17.2446 |
| 20.2277 | 17.6818 | 17.9567 |
| 25.5062 | 18.1867 | 18.6077 |
| 18.6777 | 19.3687 | 15.391  |
| 19.5662 | 21.3796 | 30      |
| 18.3027 | 19.6975 | 16.5777 |
| 30      | 30      | 30      |
| 18.4502 | 30      | 30      |
| 18.9267 | 30      | 30      |
| 18.4257 | 17.2537 | 18.0954 |
| 16.5353 | 21.8425 | 30      |
| 18.5289 | 18.843  | 17.3788 |
| 30      | 30      | 18.2816 |
| 18.1421 | 30      | 17.249  |

|         |         |         |
|---------|---------|---------|
| 16.7745 | 18.8335 | 30      |
| 17.1341 | 17.3255 | 20.7645 |
| 16.5819 | 18.8894 | 30      |
| 16.94   | 18.853  | 19.8984 |
| 19.1217 | 30      | 30      |
| 17.5173 | 19.5957 | 17.4789 |
| 15.8232 | 30      | 30      |
| 19.2118 | 16.1655 | 16.3471 |
| 22.027  | 16.3849 | 16.159  |
| 16.9609 | 30      | 18.352  |

Sox9\_A59

Sox9\_A71

Tat\_A83

|         |         |    |
|---------|---------|----|
| 30      | 21.9232 | 30 |
| 30      | 30      | 30 |
| 30      | 30      | 30 |
| 30      | 30      | 30 |
| 30      | 30      | 30 |
| 30      | 26.7149 | 30 |
| 30      | 30      | 30 |
| 11.6736 | 21.0831 | 30 |
| 30      | 30      | 30 |
| 18.4131 | 30      | 30 |
| 12.7664 | 21.5687 | 30 |
| 30      | 30      | 30 |
| 30      | 30      | 30 |
| 30      | 30      | 30 |
| 30      | 30      | 30 |
| 30      | 30      | 30 |
| 30      | 30      | 30 |
| 30      | 30      | 30 |
| 30      | 30      | 30 |
| 13.1045 | 22.2906 | 30 |
| 30      | 30      | 30 |
| 30      | 30      | 30 |
| 30      | 30      | 30 |
| 30      | 30      | 30 |
| 30      | 30      | 30 |
| 30      | 30      | 30 |
| 30      | 30      | 30 |
| 30      | 30      | 30 |
| 30      | 30      | 30 |
| 14.5311 | 27.8794 | 30 |
| 17.6331 | 30      | 30 |
| 30      | 30      | 30 |
| 30      | 30      | 30 |
| 30      | 27.2933 | 30 |
| 18.6621 | 30      | 30 |
| 30      | 30      | 30 |
| 17.654  | 30      | 30 |
| 30      | 30      | 30 |
| 17.8199 | 28.4178 | 30 |
| 30      | 30      | 30 |
| 30      | 30      | 30 |

|         |         |         |
|---------|---------|---------|
| 18.9672 | 30      | 30      |
| 30      | 30      | 30      |
| 30      | 30      | 30      |
| 30      | 30      | 30      |
| 30      | 30      | 30      |
| 13.0011 | 23.6514 | 30      |
| 30      | 30      | 30      |
| 30      | 26.8387 | 30      |
| 30      | 30      | 30      |
| 30      | 30      | 30      |
| 30      | 30      | 30      |
| 23.9826 | 30      | 30      |
| 30      | 30      | 30      |
| 30      | 30      | 30      |
| 30      | 30      | 22.6874 |
| 30      | 30      | 30      |
| 30      | 30      | 30      |
| 30      | 30      | 30      |
| 30      | 30      | 30      |
| 12.5743 | 22.391  | 30      |
| 30      | 30      | 30      |
| 30      | 30      | 30      |
| 30      | 30      | 30      |
| 30      | 30      | 30      |
| 30      | 30      | 30      |
| 18.9782 | 30      | 30      |
| 30      | 30      | 30      |
| 30      | 30      | 30      |
| 18.8034 | 30      | 30      |
| 18.8614 | 30      | 26.6306 |
| 17.3337 | 30      | 27.3488 |
| 30      | 30      | 25.2077 |
| 15.5607 | 26.056  | 30      |
| 17.8976 | 30      | 30      |
| 30      | 30      | 30      |
| 30      | 30      | 30      |
| 30      | 30      | 30      |
| 30      | 30      | 30      |
| 30      | 30      | 25.8453 |
| 30      | 30      | 30      |
| 15.5909 | 25.0207 | 30      |
| 30      | 30      | 26.2343 |

|         |         |         |
|---------|---------|---------|
| 30      | 28.9605 | 30      |
| 30      | 30      | 30      |
| 18.9909 | 30      | 30      |
| 14.4919 | 23.8834 | 30      |
| 13.0347 | 22.8602 | 30      |
| 30      | 30      | 30      |
| 30      | 30      | 19.2277 |
| 30      | 30      | 18.6507 |
| 16.5125 | 30      | 30      |
| 30      | 30      | 30      |

Tat\_A95

Tcf4\_A12

Tcf712\_A24

|    |         |         |
|----|---------|---------|
| 30 | 18.64   | 19.2471 |
| 30 | 16.4704 | 19.8112 |
| 30 | 17.11   | 19.8912 |
| 30 | 16.0207 | 19.4106 |
| 30 | 18.6571 | 20.932  |
| 30 | 16.299  | 21.9872 |
| 30 | 14.8979 | 18.1932 |
| 30 | 13.7693 | 17.7683 |
| 30 | 17.643  | 21.1961 |
| 30 | 15.8865 | 17.9539 |
| 30 | 14.4468 | 17.3518 |
| 30 | 18.1001 | 19.4096 |
| 30 | 16.2183 | 19.4053 |
| 30 | 17.0406 | 21.1058 |
| 30 | 17.3348 | 20.1424 |
| 30 | 18.7921 | 21.4249 |
| 30 | 15.9561 | 20.8683 |
| 30 | 14.6791 | 18.1381 |
| 30 | 14.8899 | 18.9441 |
| 30 | 17.3628 | 20.4767 |
| 30 | 18.4454 | 30      |
| 30 | 16.5512 | 18.985  |
| 30 | 16.6368 | 30      |
| 30 | 14.9697 | 20.0369 |
| 30 | 14.2334 | 18.0362 |
| 30 | 13.482  | 17.6448 |
| 30 | 13.7602 | 17.6104 |
| 30 | 13.6388 | 16.942  |
| 30 | 18.9199 | 30      |
| 30 | 14.9868 | 18.1645 |
| 30 | 16.9226 | 20.5434 |
| 30 | 15.3169 | 22.3055 |
| 30 | 17.6516 | 19.7439 |
| 30 | 15.271  | 18.5277 |
| 30 | 18.9133 | 30      |
| 30 | 15.8093 | 21.3751 |
| 30 | 15.1696 | 18.3778 |
| 30 | 14.907  | 18.3753 |
| 30 | 16.4368 | 22.3556 |
| 30 | 15.8402 | 18.3097 |

|    |         |         |
|----|---------|---------|
| 30 | 17.612  | 19.3647 |
| 30 | 15.8083 | 18.0525 |
| 30 | 16.1729 | 20.537  |
| 30 | 16.7014 | 20.4424 |
| 30 | 13.8318 | 18.4991 |
| 30 | 16.9297 | 19.3985 |
| 30 | 16.7054 | 22.5286 |
| 30 | 15.9954 | 18.9044 |
| 30 | 16.1852 | 19.7163 |
| 30 | 16.8349 | 25.1871 |
| 30 | 18.6844 | 20.608  |
| 30 | 18.3134 | 18.7317 |
| 30 | 13.645  | 18.3157 |
| 30 | 17.4666 | 18.7185 |
| 30 | 16.5554 | 19.7121 |
| 30 | 17.1621 | 21.1412 |
| 30 | 17.0134 | 19.9077 |
| 30 | 17.0215 | 19.0421 |
| 30 | 16.8484 | 19.246  |
| 30 | 18.6418 | 22.639  |
| 30 | 17.9537 | 22.2314 |
| 30 | 14.5839 | 18.192  |
| 30 | 14.836  | 19.0509 |
| 30 | 15.0546 | 19.46   |
| 30 | 17.9146 | 20.0462 |
| 30 | 17.3369 | 21.0601 |
| 30 | 16.5182 | 19.3486 |
| 30 | 16.0007 | 20.3451 |
| 30 | 15.3661 | 17.7494 |
| 30 | 16.1113 | 18.5682 |
| 30 | 15.8776 | 18.3282 |
| 30 | 16.2402 | 18.8867 |
| 30 | 17.5924 | 20.4857 |
| 30 | 17.0477 | 18.2478 |
| 30 | 18.7374 | 19.3798 |
| 30 | 16.2044 | 19.9856 |
| 30 | 15.48   | 18.9729 |
| 30 | 14.8775 | 19.1036 |
| 30 | 16.196  | 19.0819 |
| 30 | 14.8941 | 19.1041 |
| 30 | 16.4817 | 19.36   |



|    |         |         |
|----|---------|---------|
| 30 | 16.4499 | 19.1736 |
| 30 | 15.5106 | 18.8283 |
| 30 | 16.6822 | 20.1971 |
| 30 | 14.788  | 19.1677 |
| 30 | 16.252  | 23.5254 |
| 30 | 23.3387 | 27.8561 |
| 30 | 21.3924 | 30      |
| 30 | 14.041  | 18.8986 |
| 30 | 14.323  | 19.8755 |
| 30 | 16.6014 | 20.4418 |







Wnt3\_A72

Wnt6\_A84

Wnt6\_A96

|         |         |         |
|---------|---------|---------|
| 30      | 30      | 24.8665 |
| 30      | 30      | 30      |
| 30      | 20.2969 | 30      |
| 30      | 30      | 30      |
| 30      | 30      | 30      |
| 30      | 30      | 24.1969 |
| 30      | 19.1111 | 22.8589 |
| 30      | 30      | 30      |
| 30      | 30      | 30      |
| 30      | 30      | 26.4196 |
| 30      | 30      | 30      |
| 30      | 30      | 30      |
| 30      | 30      | 22.319  |
| 30      | 30      | 22.0164 |
| 24.7085 | 30      | 30      |
| 30      | 30      | 24.902  |
| 30      | 27.3786 | 23.0444 |
| 30      | 30      | 30      |
| 22.7814 | 21.5252 | 22.6959 |
| 30      | 30      | 30      |
| 25.6996 | 30      | 26.1841 |
| 30      | 30      | 30      |
| 18.7939 | 30      | 30      |
| 18.9461 | 30      | 30      |
| 30      | 20.1157 | 22.6191 |
| 30      | 30      | 28.273  |
| 30      | 21.2716 | 22.7009 |
| 23.6789 | 20.3758 | 21.6549 |
| 30      | 30      | 30      |
| 30      | 21.1916 | 25.4126 |
| 30      | 30      | 25.5304 |
| 30      | 30      | 30      |
| 30      | 30      | 30      |
| 30      | 30      | 28.1133 |
| 25.3189 | 30      | 30      |
| 30      | 30      | 30      |
| 30      | 30      | 30      |
| 25.2347 | 30      | 30      |
| 30      | 30      | 25.1023 |
| 30      | 30      | 26.1672 |

|         |         |         |
|---------|---------|---------|
| 27.5185 | 30      | 23.9743 |
| 21.8069 | 30      | 25.6504 |
| 30      | 30      | 30      |
| 24.6134 | 30      | 30      |
| 25.7223 | 30      | 30      |
| 30      | 30      | 30      |
| 23.2681 | 30      | 30      |
| 22.6939 | 30      | 30      |
| 22.4764 | 30      | 26.3423 |
| 30      | 30      | 25.6957 |
| 30      | 30      | 24.7583 |
| 27.593  | 30      | 30      |
| 19.0263 | 30      | 30      |
| 30      | 30      | 22.7308 |
| 19.3875 | 30      | 30      |
| 30      | 30      | 30      |
| 30      | 18.932  | 20.35   |
| 30      | 22.5092 | 21.8996 |
| 27.9549 | 30      | 30      |
| 30      | 30      | 25.4018 |
| 24.477  | 30      | 30      |
| 30      | 30      | 30      |
| 30      | 30      | 30      |
| 30      | 20.0801 | 23.1372 |
| 30      | 30      | 30      |
| 26.8418 | 30      | 30      |
| 26.159  | 30      | 28.7086 |
| 27.7779 | 30      | 30      |
| 30      | 30      | 26.908  |
| 25.3648 | 20.5031 | 26.1186 |
| 30      | 20.9488 | 23.8781 |
| 22.8066 | 30      | 30      |
| 18.867  | 30      | 30      |
| 30      | 30      | 30      |
| 30      | 30      | 30      |
| 21.8727 | 30      | 30      |
| 30      | 30      | 27.6953 |
| 30      | 30      | 27.5794 |
| 30      | 30      | 25.8843 |
| 16.6492 | 30      | 30      |
| 19.5987 | 30      | 30      |

|         |         |         |
|---------|---------|---------|
| 30      | 20.072  | 23.8267 |
| 20.9156 | 30      | 30      |
| 30      | 30      | 22.4946 |
| 30      | 30      | 30      |
| 25.3931 | 30      | 27.366  |
| 24.9081 | 30      | 30      |
| 22.793  | 30      | 30      |
| 30      | 19.9009 | 22.4236 |
| 18.9323 | 30      | 28.3992 |
| 30      | 30      | 30      |

| sampleID | Group         | Areg_A01 | Areg_A13 | Ascl2_A25 |
|----------|---------------|----------|----------|-----------|
| S33      | GFP_c-Kit_neg | 30       | 30       | 30        |
| S34      | GFP_c-Kit_neg | 30       | 30       | 30        |
| S35      | GFP_c-Kit_neg | 30       | 30       | 30        |
| S36      | GFP_c-Kit_neg | 30       | 30       | 30        |
| S37      | GFP_c-Kit_neg | 30       | 30       | 30        |
| S38      | GFP_c-Kit_neg | 30       | 30       | 30        |
| S39      | GFP_c-Kit_neg | 30       | 30       | 30        |
| S40      | GFP_c-Kit_neg | 30       | 30       | 30        |
| S41      | GFP_c-Kit_neg | 30       | 30       | 30        |
| S42      | GFP_c-Kit_neg | 30       | 30       | 30        |
| S43      | GFP_c-Kit_neg | 30       | 30       | 30        |
| S44      | GFP_c-Kit_neg | 30       | 30       | 30        |
| S45      | GFP_c-Kit_neg | 30       | 30       | 30        |
| S46      | GFP_c-Kit_neg | 30       | 30       | 30        |
| S47      | GFP_c-Kit_neg | 30       | 30       | 30        |
| S48      | GFP_c-Kit_neg | 30       | 30       | 30        |
| S65      | GFP_c-Kit_neg | 30       | 30       | 30        |
| S66      | GFP_c-Kit_neg | 30       | 30       | 30        |
| S67      | GFP_c-Kit_neg | 30       | 30       | 30        |
| S68      | GFP_c-Kit_neg | 30       | 30       | 30        |
| S69      | GFP_c-Kit_neg | 30       | 30       | 30        |
| S70      | GFP_c-Kit_neg | 30       | 30       | 30        |
| S71      | GFP_c-Kit_neg | 30       | 30       | 30        |
| S72      | GFP_c-Kit_neg | 30       | 30       | 30        |
| S73      | GFP_c-Kit_neg | 30       | 30       | 30        |
| S75      | GFP_c-Kit_neg | 30       | 30       | 30        |
| S76      | GFP_c-Kit_neg | 30       | 30       | 30        |
| S77      | GFP_c-Kit_neg | 30       | 30       | 30        |
| S78      | GFP_c-Kit_neg | 30       | 30       | 30        |
| S79      | GFP_c-Kit_neg | 30       | 30       | 30        |
| S80      | GFP_c-Kit_neg | 30       | 30       | 30        |
| S49      | GFP_c-Kit_pos | 30       | 30       | 30        |
| S50      | GFP_c-Kit_pos | 30       | 14.1627  | 30        |
| S51      | GFP_c-Kit_pos | 23.181   | 12.0719  | 16.4291   |
| S52      | GFP_c-Kit_pos | 30       | 30       | 30        |
| S53      | GFP_c-Kit_pos | 30       | 30       | 30        |
| S54      | GFP_c-Kit_pos | 28.4447  | 15.3828  | 30        |
| S55      | GFP_c-Kit_pos | 28.9863  | 17.3198  | 30        |
| S56      | GFP_c-Kit_pos | 30       | 30       | 16.4002   |
| S57      | GFP_c-Kit_pos | 30       | 30       | 30        |



|     |               |         |         |         |
|-----|---------------|---------|---------|---------|
| S58 | GFP_c-Kit_pos | 30      | 15.6987 | 30      |
| S59 | GFP_c-Kit_pos | 25.3579 | 13.5341 | 30      |
| S60 | GFP_c-Kit_pos | 30      | 30      | 30      |
| S61 | GFP_c-Kit_pos | 24.4688 | 16.2367 | 30      |
| S62 | GFP_c-Kit_pos | 30      | 19.8389 | 30      |
| S63 | GFP_c-Kit_pos | 30      | 30      | 30      |
| S64 | GFP_c-Kit_pos | 24.8087 | 13.8298 | 30      |
| S81 | GFP_c-Kit_pos | 30      | 30      | 30      |
| S82 | GFP_c-Kit_pos | 30      | 30      | 30      |
| S83 | GFP_c-Kit_pos | 30      | 30      | 30      |
| S84 | GFP_c-Kit_pos | 30      | 30      | 30      |
| S85 | GFP_c-Kit_pos | 25.0233 | 14.1363 | 30      |
| S86 | GFP_c-Kit_pos | 30      | 30      | 30      |
| S87 | GFP_c-Kit_pos | 30      | 23.2403 | 30      |
| S88 | GFP_c-Kit_pos | 22.0641 | 13.5491 | 15.6414 |
| S89 | GFP_c-Kit_pos | 30      | 30      | 30      |
| S90 | GFP_c-Kit_pos | 30      | 30      | 30      |
| S91 | GFP_c-Kit_pos | 30      | 15.5233 | 30      |
| S92 | GFP_c-Kit_pos | 30      | 30      | 30      |
| S93 | GFP_c-Kit_pos | 30      | 30      | 30      |
| S94 | GFP_c-Kit_pos | 30      | 30      | 30      |
| S95 | GFP_c-Kit_pos | 26.6753 | 12.9375 | 30      |
| S96 | GFP_c-Kit_pos | 30      | 30      | 30      |

| Ascl2_A37 | Atoh1_A49 | Atoh1_A61 | Axin2_A73 | Axin2_A85 | Bmi1_A02 | Bmi1_A14 |
|-----------|-----------|-----------|-----------|-----------|----------|----------|
| 30        | 14.2483   | 15.0452   | 30        | 30        | 15.0162  | 15.8605  |
| 30        | 30        | 14.1889   | 13.2649   | 16.1027   | 15.8906  | 16.2449  |
| 30        | 13.1867   | 15.1832   | 30        | 30        | 14.768   | 16.5608  |
| 30        | 14.1967   | 14.1352   | 30        | 30        | 14.7245  | 15.5788  |
| 30        | 14.1934   | 15.7203   | 15.3641   | 30        | 15.6388  | 14.8381  |
| 30        | 14.4312   | 13.7417   | 30        | 16.7065   | 14.995   | 14.0424  |
| 30        | 14.8796   | 14.4169   | 14.8291   | 17.0544   | 16.9329  | 13.7677  |
| 30        | 13.6679   | 14.408    | 30        | 30        | 13.9769  | 13.7934  |
| 30        | 13.7274   | 14.0044   | 30        | 30        | 14.5516  | 15.4678  |
| 30        | 14.1883   | 16.3264   | 30        | 30        | 16.4426  | 15.1174  |
| 30        | 30        | 30        | 17.4699   | 30        | 15.8431  | 18.6331  |
| 30        | 14.4784   | 14.1442   | 30        | 30        | 15.2508  | 15.6827  |
| 30        | 14.2826   | 14.1697   | 30        | 30        | 14.6947  | 14.5768  |
| 30        | 13.7961   | 15.759    | 30        | 30        | 14.6049  | 11.3555  |
| 30        | 30        | 30        | 19.611    | 30        | 14.2501  | 14.651   |
| 30        | 14.3277   | 13.8714   | 30        | 30        | 30       | 15.5896  |
| 30        | 30        | 30        | 17.3124   | 15.8576   | 30       | 14.9666  |
| 30        | 30        | 15.4042   | 30        | 30        | 16.8283  | 14.6435  |
| 30        | 15.3465   | 22.4846   | 17.6052   | 30        | 16.2074  | 15.0939  |
| 30        | 14.1266   | 14.8042   | 30        | 30        | 16.3032  | 15.0117  |
| 30        | 14.204    | 13.5584   | 15.4846   | 30        | 19.9759  | 17.2077  |
| 30        | 14.9659   | 16.5213   | 30        | 30        | 15.4254  | 14.6655  |
| 30        | 16.4052   | 14.1547   | 30        | 30        | 30       | 16.3477  |
| 30        | 30        | 30        | 30        | 15.8067   | 20.4014  | 14.657   |
| 30        | 15.4532   | 22.4391   | 14.2688   | 18.5262   | 30       | 30       |
| 30        | 15.6402   | 16.1499   | 30        | 30        | 16.167   | 30       |
| 30        | 14.2306   | 15.6517   | 30        | 30        | 13.4942  | 15.8337  |
| 30        | 13.8827   | 14.4086   | 30        | 30        | 15.0852  | 14.1342  |
| 30        | 13.7244   | 13.7393   | 30        | 30        | 14.5686  | 14.5321  |
| 30        | 16.851    | 21.2545   | 16.3071   | 16.6091   | 13.9339  | 15.1775  |
| 30        | 14.4879   | 14.6592   | 30        | 30        | 14.7869  | 14.4593  |
| 30        | 14.4828   | 13.9568   | 30        | 23.0986   | 17.8794  | 16.6052  |
| 30        | 15.396    | 18.9838   | 30        | 30        | 15.2845  | 14.2938  |
| 30        | 14.3913   | 16.4683   | 12.9556   | 15.6739   | 30       | 14.4666  |
| 30        | 11.0268   | 11.5418   | 15.8616   | 18.7893   | 14.9787  | 14.5783  |
| 30        | 13.1826   | 13.2949   | 14.6744   | 19.804    | 14.4113  | 14.1503  |
| 30        | 16.0151   | 16.2535   | 14.1878   | 19.1327   | 16.4805  | 14.0426  |
| 30        | 12.6617   | 15.2974   | 16.0837   | 16.0476   | 14.7367  | 13.9716  |
| 15.4729   | 15.7935   | 17.1498   | 30        | 30        | 30       | 21.9501  |
| 30        | 13.7681   | 13.3872   | 14.4677   | 14.6574   | 12.9854  | 14.0449  |

|    |         |         |         |         |         |         |
|----|---------|---------|---------|---------|---------|---------|
| 30 | 15.651  | 30      | 30      | 30      | 15.1592 | 20.9085 |
| 30 | 12.1483 | 13.7581 | 14.6096 | 23.1745 | 14.5388 | 13.8748 |
| 30 | 23.5184 | 14.6143 | 14.2219 | 17.3787 | 15.5419 | 17.9194 |
| 30 | 15.4543 | 30      | 16.0784 | 15.04   | 13.5824 | 14.6733 |
| 30 | 12.8731 | 12.1232 | 15.3478 | 16.1497 | 14.2316 | 16.6102 |
| 30 | 13.368  | 13.7271 | 14.9754 | 19.5608 | 16.3541 | 15.3287 |
| 30 | 12.1131 | 12.3593 | 30      | 16.5609 | 15.0666 | 13.6317 |
| 30 | 14.298  | 15.0098 | 13.2054 | 15.422  | 13.236  | 14.7273 |
| 30 | 12.6097 | 14.6525 | 14.2265 | 20.9834 | 14.3799 | 14.994  |
| 30 | 13.7353 | 14.3005 | 30      | 30      | 30      | 19.8743 |
| 30 | 15.7047 | 22.4989 | 15.0105 | 18.2171 | 21.5112 | 18.4313 |
| 30 | 13.1924 | 12.7644 | 30      | 30      | 17.7398 | 15.4165 |
| 30 | 15.2837 | 15.4867 | 14.8372 | 17.7576 | 13.1261 | 14.9552 |
| 30 | 15.2612 | 18.2434 | 13.627  | 15.6145 | 30      | 15.2597 |
| 30 | 11.6484 | 13.3901 | 10.3615 | 13.131  | 12.3212 | 14.8436 |
| 30 | 14.0485 | 12.8805 | 13.8651 | 15.4574 | 13.4094 | 13.9843 |
| 30 | 14.0001 | 15.1453 | 18.8356 | 14.7583 | 14.3532 | 21.6947 |
| 30 | 10.3282 | 10.9177 | 15.6514 | 15.0157 | 17.2822 | 22.892  |
| 30 | 16.5839 | 13.7769 | 30      | 30      | 13.8039 | 17.4797 |
| 30 | 30      | 30      | 13.4959 | 16.5831 | 30      | 18.2571 |
| 30 | 12.3555 | 12.9902 | 14.5557 | 15.1339 | 15.3138 | 15.1163 |
| 30 | 14.5104 | 15.712  | 30      | 30      | 15.3193 | 17.1043 |
| 30 | 30      | 14.134  | 14.7756 | 30      | 19.4218 | 14.2791 |

| Bmpr1a_A26 | Bmpr1a_A38 | Ccnd1_A50 | Ccnd1_A62 | Cdkn1a_A74 | Cdkn1a_A86 | Cdx1_A03 |
|------------|------------|-----------|-----------|------------|------------|----------|
| 30         | 30         | 30        | 30        | 13.0333    | 16.2251    | 30       |
| 30         | 13.8775    | 30        | 30        | 30         | 14.5546    | 30       |
| 30         | 30         | 30        | 23.9333   | 15.5096    | 14.863     | 19.4537  |
| 30         | 14.7385    | 30        | 22.1584   | 15.7418    | 21.2237    | 18.977   |
| 15.5744    | 14.9032    | 30        | 30        | 12.181     | 14.4581    | 20.7978  |
| 30         | 17.6942    | 30        | 20.9957   | 13.0268    | 15.8339    | 30       |
| 30         | 16.7911    | 30        | 30        | 14.8287    | 13.6596    | 24.0563  |
| 30         | 30         | 30        | 20.608    | 30         | 15.159     | 24.7029  |
| 30         | 14.9714    | 30        | 23.0668   | 14.9286    | 18.4933    | 20.0349  |
| 30         | 15.5079    | 30        | 23.4297   | 13.1712    | 14.3219    | 23.1312  |
| 30         | 15.3827    | 30        | 30        | 14.2333    | 30         | 30       |
| 14.6066    | 13.6319    | 30        | 27.9142   | 18.9893    | 15.1788    | 30       |
| 30         | 15.7208    | 30        | 24.6699   | 12.5718    | 14.1491    | 20.069   |
| 30         | 30         | 30        | 24.6351   | 14.3902    | 16.1178    | 30       |
| 14.1973    | 15.0458    | 30        | 22.3016   | 15.4568    | 30         | 30       |
| 15.3833    | 30         | 30        | 30        | 12.3074    | 16.6006    | 30       |
| 15.2987    | 14.2475    | 30        | 21.1794   | 14.4451    | 15.4804    | 30       |
| 15.492     | 14.4954    | 30        | 26.3155   | 13.1332    | 13.4878    | 30       |
| 15.3197    | 15.3923    | 30        | 23.856    | 13.3061    | 16.019     | 19.3615  |
| 30         | 15.8366    | 30        | 30        | 15.0466    | 16.7928    | 23.3697  |
| 30         | 30         | 30        | 15.3376   | 30         | 15.9766    | 19.7223  |
| 15.2556    | 15.2619    | 30        | 30        | 15.1736    | 15.383     | 30       |
| 30         | 30         | 30        | 30        | 13.4837    | 14.2129    | 30       |
| 14.025     | 13.624     | 30        | 30        | 15.5727    | 16.6359    | 30       |
| 14.5295    | 13.0974    | 30        | 30        | 10.9347    | 14.7657    | 30       |
| 30         | 30         | 30        | 21.0062   | 14.3608    | 15.1074    | 30       |
| 30         | 15.4102    | 30        | 30        | 14.6725    | 14.8271    | 30       |
| 30         | 15.4275    | 30        | 30        | 15.1009    | 14.2807    | 30       |
| 30         | 15.3651    | 30        | 22.8446   | 14.5029    | 14.6617    | 30       |
| 15.3261    | 13.7164    | 30        | 23.6868   | 11.3352    | 14.5975    | 30       |
| 14.7388    | 12.9967    | 30        | 30        | 11.4569    | 14.4095    | 30       |
| 15.5603    | 30         | 15.5139   | 13.5478   | 14.9212    | 14.9324    | 18.9555  |
| 30         | 16.3589    | 15.988    | 13.6486   | 15.8645    | 14.7598    | 19.0446  |
| 30         | 15.9869    | 16.7134   | 12.79     | 15.3739    | 15.0713    | 19.924   |
| 15.5955    | 14.0548    | 30        | 24.4306   | 21.056     | 16.3218    | 20.7284  |
| 30         | 16.201     | 30        | 30        | 16.071     | 15.5757    | 20.8758  |
| 13.7756    | 12.3257    | 30        | 30        | 14.6397    | 15.5815    | 19.7184  |
| 14.4211    | 14.6316    | 30        | 30        | 15.5005    | 17.7028    | 24.0353  |
| 16.163     | 13.4263    | 30        | 21.4798   | 14.083     | 14.6278    | 19.0776  |
| 13.2992    | 13.5879    | 30        | 30        | 30         | 17.9023    | 17.9104  |

|         |         |         |         |         |         |         |
|---------|---------|---------|---------|---------|---------|---------|
| 15.2047 | 14.425  | 30      | 30      | 14.1727 | 30      | 18.5612 |
| 15.5319 | 13.0017 | 30      | 15.3577 | 14.7119 | 15.4449 | 19.3203 |
| 15.7997 | 15.563  | 30      | 30      | 15.8369 | 17.5866 | 18.487  |
| 14.5027 | 14.6829 | 22.7086 | 30      | 30      | 30      | 18.4125 |
| 13.7203 | 30      | 16.5006 | 13.193  | 30      | 17.0795 | 19.7251 |
| 13.4654 | 30      | 17.309  | 13.7498 | 14.9399 | 18.3189 | 30      |
| 13.7047 | 15.4651 | 30      | 30      | 16.0622 | 15.1583 | 18.0525 |
| 14.734  | 15.574  | 30      | 30      | 30      | 16.4862 | 19.2559 |
| 14.3393 | 14.4037 | 22.3165 | 14.0338 | 17.3056 | 16.004  | 18.5187 |
| 14.7269 | 14.606  | 18.3186 | 15.55   | 20.7061 | 15.7583 | 19.7168 |
| 30      | 14.505  | 30      | 14.199  | 17.3841 | 20.9129 | 20.7461 |
| 14.5229 | 13.3268 | 30      | 22.4528 | 13.9764 | 30      | 18.1265 |
| 15.9136 | 15.7508 | 17.0971 | 13.5449 | 14.7598 | 20.9031 | 20.7774 |
| 14.4959 | 13.8753 | 19.8425 | 19.0526 | 14.7703 | 30      | 20.7509 |
| 13.5169 | 13.5132 | 15.5123 | 11.9627 | 18.1363 | 14.2768 | 17.8706 |
| 16.5564 | 14.5594 | 15.9568 | 13.5625 | 14.2155 | 15.9759 | 19.4227 |
| 30      | 30      | 17.8896 | 15.3198 | 16.382  | 15.7413 | 21.3288 |
| 13.6873 | 14.2516 | 30      | 13.845  | 13.3691 | 16.53   | 19.17   |
| 30      | 30      | 15.8442 | 30      | 15.7676 | 16.3432 | 20.0055 |
| 15.519  | 30      | 30      | 15.4468 | 18.8523 | 15.6748 | 30      |
| 15.3961 | 17.2541 | 16.2782 | 16.3462 | 16.8808 | 15.6226 | 20.7455 |
| 14.5898 | 21.3968 | 17.0699 | 30      | 13.7081 | 13.2993 | 30      |
| 15.4401 | 15.1727 | 30      | 15.0677 | 30      | 30      | 30      |

| Cdx1_A15 | Chga_A27 | Chga_A39 | Cre_A22 | Cubn_A51 | Cubn_A63 | Dll4_A75 |
|----------|----------|----------|---------|----------|----------|----------|
| 30       | 8.30998  | 8.78904  | 30      | 30       | 30       | 30       |
| 19.164   | 17.2023  | 30       | 30      | 30       | 30       | 30       |
| 30       | 7.74187  | 8.66311  | 30      | 30       | 30       | 14.4725  |
| 30       | 7.58562  | 8.71986  | 30      | 30       | 30       | 30       |
| 19.2659  | 7.70973  | 9.05252  | 30      | 30       | 30       | 30       |
| 30       | 7.45452  | 7.68595  | 30      | 30       | 30       | 30       |
| 30       | 8.10042  | 7.93826  | 30      | 30       | 30       | 17.7146  |
| 30       | 8.53627  | 10.943   | 30      | 30       | 30       | 30       |
| 30       | 7.75771  | 7.87187  | 30      | 30       | 30       | 30       |
| 30       | 7.70694  | 8.54507  | 30      | 30       | 30       | 15.4762  |
| 30       | 8.52996  | 10.0445  | 30      | 30       | 30       | 30       |
| 30       | 13.3649  | 15.4893  | 30      | 30       | 14.1724  | 30       |
| 19.009   | 7.94415  | 8.14879  | 30      | 30       | 30       | 12.8938  |
| 30       | 8.89202  | 11.2414  | 30      | 30       | 30       | 30       |
| 17.5639  | 8.59629  | 9.14691  | 30      | 30       | 30       | 30       |
| 20.5027  | 8.0388   | 8.06782  | 30      | 30       | 30       | 14.5773  |
| 30       | 7.91102  | 9.3316   | 30      | 30       | 30       | 30       |
| 30       | 9.08148  | 10.1196  | 30      | 30       | 30       | 14.9933  |
| 30       | 7.53237  | 8.09541  | 30      | 30       | 30       | 30       |
| 30       | 9.69501  | 11.8125  | 30      | 30       | 30       | 30       |
| 19.8733  | 30       | 30       | 30      | 30       | 30       | 30       |
| 30       | 8.3003   | 8.85243  | 30      | 30       | 30       | 30       |
| 30       | 8.89752  | 9.70687  | 30      | 30       | 30       | 30       |
| 30       | 7.67929  | 8.72228  | 30      | 15.8059  | 30       | 30       |
| 30       | 9.05025  | 9.95379  | 30      | 30       | 30       | 30       |
| 30       | 8.58888  | 10.7558  | 30      | 30       | 30       | 30       |
| 30       | 8.41431  | 9.00152  | 30      | 30       | 30       | 16.6224  |
| 18.6107  | 7.50927  | 7.83141  | 30      | 30       | 30       | 14.2811  |
| 30       | 8.07639  | 9.22637  | 30      | 30       | 30       | 30       |
| 30       | 7.77428  | 8.01249  | 30      | 30       | 30       | 15.5064  |
| 30       | 6.78288  | 8.16827  | 30      | 30       | 30       | 30       |
| 18.2518  | 30       | 30       | 30      | 30       | 30       | 30       |
| 16.5365  | 30       | 30       | 30      | 30       | 30       | 14.8452  |
| 16.498   | 30       | 30       | 30      | 30       | 30       | 13.1782  |
| 19.393   | 30       | 30       | 30      | 30       | 30       | 21.4304  |
| 17.2395  | 30       | 30       | 30      | 30       | 30       | 15.8666  |
| 30       | 30       | 30       | 30      | 30       | 30       | 14.177   |
| 17.6776  | 30       | 30       | 30      | 30       | 30       | 13.6529  |
| 18.4424  | 30       | 30       | 30      | 30       | 30       | 30       |
| 30       | 30       | 30       | 30      | 30       | 30       | 14.8624  |

|         |         |         |    |    |    |         |
|---------|---------|---------|----|----|----|---------|
| 18.5895 | 30      | 30      | 30 | 30 | 30 | 16.6602 |
| 21.9304 | 30      | 30      | 30 | 30 | 30 | 30      |
| 17.8941 | 30      | 30      | 30 | 30 | 30 | 15.3043 |
| 17.8248 | 30      | 30      | 30 | 30 | 30 | 30      |
| 18.4787 | 30      | 30      | 30 | 30 | 30 | 14.1242 |
| 30      | 30      | 30      | 30 | 30 | 30 | 15.5957 |
| 19.3234 | 30      | 30      | 30 | 30 | 30 | 14.6188 |
| 20.0081 | 23.4075 | 24.0316 | 30 | 30 | 30 | 14.7886 |
| 30      | 25.83   | 30      | 30 | 30 | 30 | 13.2181 |
| 19.9797 | 30      | 30      | 30 | 30 | 30 | 30      |
| 30      | 30      | 30      | 30 | 30 | 30 | 14.9176 |
| 19.3204 | 30      | 30      | 30 | 30 | 30 | 14.4422 |
| 19.9468 | 30      | 30      | 30 | 30 | 30 | 14.1808 |
| 30      | 30      | 30      | 30 | 30 | 30 | 15.6497 |
| 18.4451 | 30      | 30      | 30 | 30 | 30 | 14.0114 |
| 17.7463 | 30      | 30      | 30 | 30 | 30 | 15.9086 |
| 30      | 30      | 30      | 30 | 30 | 30 | 14.8339 |
| 17.3541 | 30      | 30      | 30 | 30 | 30 | 15.1978 |
| 19.4394 | 30      | 30      | 30 | 30 | 30 | 15.6613 |
| 19.7168 | 30      | 30      | 30 | 30 | 30 | 30      |
| 20.6712 | 30      | 30      | 30 | 30 | 30 | 14.6786 |
| 20.1247 | 30      | 30      | 30 | 30 | 30 | 30      |
| 22.0502 | 30      | 30      | 30 | 30 | 30 | 15.8309 |

| Dll4_A87 | Dvl2_A04 | Dvl2_A16 | Efnb1_A28 | Efnb1_A40 | Epas1_A52 | Epas1_A64 |
|----------|----------|----------|-----------|-----------|-----------|-----------|
| 30       | 15.4115  | 15.5584  | 30        | 15.273    | 30        | 30        |
| 30       | 30       | 15.558   | 30        | 30        | 30        | 30        |
| 30       | 17.6138  | 30       | 30        | 13.6475   | 30        | 30        |
| 16.2003  | 15.504   | 14.9425  | 13.9502   | 30        | 30        | 30        |
| 30       | 17.8636  | 15.9776  | 30        | 30        | 30        | 30        |
| 14.8851  | 30       | 14.1577  | 30        | 14.9062   | 30        | 30        |
| 30       | 30       | 15.0095  | 30        | 22.1323   | 30        | 30        |
| 30       | 19.9077  | 14.117   | 30        | 14.2497   | 30        | 30        |
| 16.4927  | 22.2331  | 30       | 30        | 14.5755   | 30        | 30        |
| 16.1587  | 15.9769  | 14.9174  | 30        | 15.0207   | 30        | 30        |
| 30       | 30       | 13.875   | 30        | 16.32     | 30        | 30        |
| 30       | 18.7896  | 16.9224  | 30        | 14.1688   | 30        | 30        |
| 14.5755  | 17.5874  | 14.1132  | 30        | 13.8767   | 30        | 30        |
| 30       | 15.8157  | 15.6245  | 30        | 30        | 30        | 30        |
| 30       | 30       | 30       | 30        | 30        | 30        | 30        |
| 17.15    | 17.2596  | 16.2418  | 30        | 14.2066   | 30        | 30        |
| 30       | 30       | 16.402   | 30        | 30        | 30        | 30        |
| 30       | 30       | 15.2704  | 30        | 17.1484   | 30        | 30        |
| 30       | 18.6734  | 30       | 30        | 30        | 30        | 30        |
| 30       | 30       | 16.3645  | 15.3861   | 30        | 30        | 30        |
| 15.7599  | 30       | 20.0878  | 30        | 16.1248   | 30        | 30        |
| 30       | 18.5262  | 16.4943  | 30        | 30        | 30        | 30        |
| 30       | 19.6333  | 16.6883  | 30        | 16.1806   | 30        | 30        |
| 30       | 19.2536  | 16.9792  | 15.5046   | 17.4202   | 30        | 30        |
| 30       | 30       | 30       | 15.5783   | 23.2026   | 30        | 30        |
| 17.0165  | 30       | 16.2975  | 30        | 14.8201   | 30        | 30        |
| 30       | 30       | 30       | 30        | 15.5343   | 30        | 30        |
| 18.3433  | 15.3939  | 14.4953  | 30        | 16.1007   | 30        | 30        |
| 30       | 30       | 30       | 30        | 14.9071   | 30        | 30        |
| 14.765   | 18.127   | 20.4825  | 16.5438   | 19.1862   | 30        | 30        |
| 30       | 19.3336  | 15.3275  | 30        | 30        | 30        | 30        |
| 30       | 30       | 30       | 30        | 16.4742   | 30        | 30        |
| 14.5227  | 30       | 16.9946  | 30        | 14.911    | 30        | 30        |
| 16.1932  | 20.0757  | 14.639   | 30        | 15.6566   | 30        | 15.8365   |
| 30       | 15.6245  | 30       | 15.4577   | 16.8749   | 30        | 30        |
| 14.391   | 30       | 30       | 23.464    | 30        | 30        | 30        |
| 13.8381  | 30       | 19.0286  | 30        | 30        | 30        | 30        |
| 30       | 30       | 30       | 30        | 30        | 30        | 30        |
| 30       | 30       | 30       | 30        | 16.4081   | 16.3441   | 14.8591   |
| 17.0556  | 21.1663  | 16.4134  | 30        | 30        | 15.9615   | 18.8434   |



|         |         |         |         |         |         |         |
|---------|---------|---------|---------|---------|---------|---------|
| 30      | 30      | 30      | 30      | 30      | 30      | 30      |
| 30      | 16.399  | 30      | 15.2482 | 15.2574 | 30      | 30      |
| 15.4453 | 30      | 30      | 30      | 30      | 30      | 30      |
| 16.5065 | 30      | 30      | 30      | 15.6249 | 30      | 30      |
| 15.6078 | 30      | 16.1081 | 30      | 15.8681 | 15.9488 | 30      |
| 16.5141 | 30      | 18.5414 | 19.859  | 30      | 30      | 30      |
| 30      | 15.1229 | 30      | 30      | 16.1177 | 30      | 15.6744 |
| 15.5928 | 21.673  | 30      | 30      | 30      | 30      | 30      |
| 14.8094 | 14.1203 | 30      | 16.8662 | 30      | 30      | 30      |
| 30      | 30      | 30      | 20.7239 | 30      | 30      | 30      |
| 30      | 15.5049 | 30      | 17.8043 | 15.1514 | 30      | 30      |
| 16.1255 | 30      | 30      | 30      | 30      | 30      | 30      |
| 16.1142 | 16.5901 | 16.9187 | 30      | 16.1515 | 14.3334 | 14.1343 |
| 15.1662 | 30      | 15.708  | 17.0182 | 30      | 16.1446 | 30      |
| 14.1186 | 17.297  | 15.3857 | 30      | 30      | 30      | 17.5915 |
| 14.8578 | 30      | 30      | 30      | 30      | 17.0674 | 30      |
| 16.873  | 19.8359 | 30      | 15.3684 | 30      | 30      | 30      |
| 14.7907 | 30      | 17.0178 | 30      | 15.7148 | 14.8726 | 16.6736 |
| 30      | 18.0416 | 16.9194 | 30      | 30      | 30      | 14.5072 |
| 15.5766 | 30      | 30      | 30      | 30      | 15.1452 | 30      |
| 15.9282 | 30      | 30      | 30      | 30      | 30      | 30      |
| 17.4533 | 30      | 30      | 15.6887 | 14.8826 | 30      | 30      |
| 30      | 30      | 15.629  | 30      | 30      | 16.4534 | 30      |

| Ephb2_A76 | Ephb2_A88 | Ereg_A05 | Ereg_A17 | Fut2_A29 | Fut2_A41 | Gapdh_A53 |
|-----------|-----------|----------|----------|----------|----------|-----------|
| 30        | 30        | 30       | 30       | 30       | 13.4707  | 9.55276   |
| 30        | 30        | 30       | 30       | 30       | 15.3137  | 9.71601   |
| 30        | 30        | 30       | 30       | 30       | 14.4433  | 9.39964   |
| 30        | 30        | 30       | 30       | 30       | 14.5063  | 9.37447   |
| 30        | 16.9749   | 30       | 30       | 30       | 16.3198  | 9.94169   |
| 30        | 30        | 30       | 30       | 30       | 13.6721  | 9.59827   |
| 30        | 30        | 30       | 30       | 30       | 16.7304  | 9.70106   |
| 30        | 16.7829   | 30       | 30       | 30       | 12.879   | 8.74807   |
| 30        | 30        | 30       | 30       | 30       | 13.6742  | 9.6933    |
| 30        | 30        | 30       | 30       | 30       | 13.8572  | 9.61156   |
| 30        | 30        | 30       | 30       | 30       | 14.6947  | 10.6918   |
| 30        | 16.7378   | 30       | 30       | 30       | 15.181   | 9.75069   |
| 30        | 30        | 30       | 30       | 30       | 14.7295  | 9.39157   |
| 30        | 30        | 30       | 30       | 30       | 16.8005  | 9.95442   |
| 15.4349   | 30        | 30       | 30       | 30       | 14.8143  | 10.7673   |
| 30        | 30        | 30       | 30       | 30       | 16.3146  | 9.89391   |
| 30        | 17.0066   | 30       | 30       | 30       | 21.6846  | 10.4326   |
| 30        | 30        | 30       | 30       | 30       | 15.2066  | 9.80494   |
| 15.3875   | 17.1062   | 30       | 30       | 30       | 15.2989  | 10.4524   |
| 15.3177   | 30        | 30       | 30       | 30       | 13.7535  | 9.91118   |
| 30        | 17.6761   | 30       | 30       | 30       | 15.8606  | 10.3388   |
| 30        | 30        | 30       | 30       | 30       | 14.013   | 9.72413   |
| 30        | 19.5842   | 30       | 30       | 30       | 30       | 10.4561   |
| 30        | 15.9624   | 30       | 30       | 30       | 16.2134  | 11.3632   |
| 15.5008   | 30        | 30       | 30       | 30       | 15.7087  | 10.9748   |
| 30        | 30        | 30       | 30       | 30       | 15.4275  | 9.38953   |
| 30        | 17.5571   | 30       | 30       | 30       | 16.6662  | 9.95812   |
| 30        | 30        | 30       | 30       | 30       | 14.6921  | 9.68496   |
| 30        | 30        | 30       | 30       | 30       | 15.3885  | 9.79611   |
| 30        | 30        | 30       | 30       | 30       | 16.3993  | 10.2235   |
| 15.6579   | 30        | 30       | 30       | 30       | 30       | 9.77735   |
| 15.1502   | 17.211    | 30       | 30       | 30       | 18.7653  | 10.6039   |
| 15.7429   | 16.8244   | 30       | 30       | 30       | 18.1466  | 9.58687   |
| 14.4022   | 30        | 30       | 30       | 30       | 17.6306  | 9.56878   |
| 14.6159   | 17.2548   | 30       | 30       | 30       | 30       | 10.0472   |
| 13.0156   | 15.4437   | 30       | 30       | 30       | 16.0415  | 10.3722   |
| 13.2226   | 16.088    | 30       | 30       | 30       | 15.6463  | 9.69441   |
| 14.9475   | 15.2221   | 30       | 30       | 30       | 16.3442  | 10.5443   |
| 30        | 16.073    | 30       | 30       | 30       | 17.0183  | 9.93882   |
| 12.8108   | 16.4094   | 30       | 30       | 30       | 17.4895  | 10.4199   |

|         |         |         |    |    |         |         |
|---------|---------|---------|----|----|---------|---------|
| 15.559  | 30      | 30      | 30 | 30 | 30      | 11.2955 |
| 14.3    | 17.0848 | 30      | 30 | 30 | 15.5139 | 9.26529 |
| 14.5645 | 30      | 30      | 30 | 30 | 30      | 10.8466 |
| 30      | 14.7571 | 30      | 30 | 30 | 30      | 10.8684 |
| 13.8861 | 15.8668 | 30      | 30 | 30 | 20.5764 | 10.1898 |
| 15.3557 | 30      | 30      | 30 | 30 | 14.1842 | 9.48992 |
| 15.5462 | 15.7908 | 30      | 30 | 30 | 30      | 10.7989 |
| 13.6223 | 16.7648 | 30      | 30 | 30 | 17.4188 | 9.65111 |
| 13.4574 | 17.5269 | 30      | 30 | 30 | 18.5884 | 10.1441 |
| 15.4384 | 16.9386 | 30      | 30 | 30 | 30      | 11.5624 |
| 14.8387 | 15.6952 | 30      | 30 | 30 | 15.2605 | 11.7437 |
| 30      | 15.9311 | 30      | 30 | 30 | 15.7645 | 9.68954 |
| 14.5463 | 15.3955 | 30      | 30 | 30 | 22.2119 | 10.1906 |
| 30      | 30      | 30      | 30 | 30 | 30      | 9.99249 |
| 13.6168 | 30      | 30      | 30 | 30 | 20.9312 | 8.25324 |
| 13.4667 | 14.9144 | 30      | 30 | 30 | 15.7191 | 9.17784 |
| 30      | 15.4862 | 30      | 30 | 30 | 30      | 10.0396 |
| 12.3083 | 23.8084 | 30      | 30 | 30 | 30      | 9.40721 |
| 15.5221 | 30      | 30      | 30 | 30 | 16.1092 | 10.5002 |
| 13.9103 | 16.5277 | 30      | 30 | 30 | 18.3439 | 9.92342 |
| 13.1842 | 14.6072 | 22.8134 | 30 | 30 | 16.1314 | 10.5096 |
| 15.6819 | 16.8946 | 30      | 30 | 30 | 30      | 10.4471 |
| 14.57   | 30      | 30      | 30 | 30 | 30      | 11.5697 |

| Gapdh_A65 | Gsk3b_A77 | Gsk3b_A89 | Gusb_A06 | Gusb_A18 | H6pd_A30 | H6pd_A42 |
|-----------|-----------|-----------|----------|----------|----------|----------|
| 9.46788   | 30        | 16.0131   | 30       | 16.4545  | 30       | 30       |
| 9.65757   | 30        | 30        | 30       | 17.3578  | 30       | 30       |
| 9.44871   | 17.6469   | 15.5139   | 30       | 15.659   | 30       | 30       |
| 9.51305   | 30        | 15.5521   | 30       | 16.3827  | 17.5973  | 30       |
| 9.93951   | 30        | 15.4515   | 30       | 16.5882  | 30       | 30       |
| 9.62014   | 14.9128   | 30        | 30       | 30       | 30       | 15.7634  |
| 9.61245   | 30        | 30        | 16.051   | 14.8796  | 16.6886  | 30       |
| 8.84132   | 30        | 30        | 30       | 15.1684  | 30       | 30       |
| 9.69682   | 30        | 30        | 30       | 14.3805  | 30       | 30       |
| 9.65521   | 30        | 30        | 30       | 15.2344  | 30       | 30       |
| 10.7106   | 30        | 30        | 15.9284  | 19.1266  | 30       | 30       |
| 9.74138   | 30        | 30        | 30       | 14.6322  | 30       | 30       |
| 9.4162    | 16.447    | 30        | 30       | 16.9345  | 30       | 30       |
| 10.0438   | 30        | 30        | 30       | 15.2904  | 30       | 30       |
| 10.8142   | 30        | 13.5411   | 30       | 18.0458  | 30       | 30       |
| 9.95556   | 30        | 30        | 30       | 15.2284  | 30       | 30       |
| 10.6355   | 30        | 30        | 14.9583  | 30       | 16.2518  | 30       |
| 10.0569   | 30        | 30        | 30       | 17.4083  | 30       | 30       |
| 10.6607   | 14.5235   | 14.7132   | 16.0474  | 19.4857  | 30       | 30       |
| 10.0341   | 30        | 30        | 30       | 15.0237  | 30       | 30       |
| 10.5065   | 30        | 30        | 30       | 30       | 30       | 30       |
| 9.84827   | 30        | 15.5756   | 30       | 15.4749  | 30       | 30       |
| 10.5582   | 30        | 30        | 30       | 16.6417  | 30       | 30       |
| 11.4338   | 30        | 14.0634   | 30       | 21.1077  | 30       | 30       |
| 11.0602   | 30        | 17.8115   | 30       | 30       | 30       | 30       |
| 9.4657    | 30        | 30        | 30       | 15.4342  | 30       | 30       |
| 10.0161   | 30        | 15.6312   | 30       | 18.3034  | 30       | 24.281   |
| 9.80561   | 30        | 30        | 30       | 30       | 30       | 30       |
| 9.87719   | 30        | 30        | 30       | 17.0418  | 30       | 30       |
| 10.3495   | 15.2977   | 14.546    | 30       | 17.7354  | 30       | 24.2674  |
| 9.82894   | 30        | 15.933    | 30       | 14.2808  | 30       | 30       |
| 10.6952   | 30        | 30        | 16.1305  | 30       | 30       | 30       |
| 9.68189   | 16.2391   | 30        | 30       | 13.6153  | 30       | 30       |
| 9.69522   | 13.8748   | 13.3943   | 16.0775  | 30       | 30       | 30       |
| 10.3225   | 16.3109   | 30        | 15.2697  | 15.8166  | 30       | 21.6956  |
| 10.4507   | 20.8361   | 14.4455   | 15.1214  | 16.2607  | 16.2751  | 30       |
| 9.87895   | 15.3202   | 14.3586   | 30       | 16.127   | 15.8824  | 15.361   |
| 10.7087   | 16.4338   | 15.8443   | 30       | 18.7129  | 17.0245  | 19.6659  |
| 10.1141   | 16.1838   | 13.7245   | 16.444   | 14.6689  | 30       | 30       |
| 10.605    | 16.1228   | 14.2466   | 30       | 30       | 30       | 30       |

|         |         |         |         |         |         |         |
|---------|---------|---------|---------|---------|---------|---------|
| 11.4391 | 14.947  | 14.8161 | 16.2319 | 14.6653 | 30      | 30      |
| 9.40854 | 13.6035 | 12.8399 | 30      | 14.7502 | 30      | 30      |
| 10.9506 | 16.1348 | 15.7513 | 30      | 16.5741 | 16.5859 | 16.3206 |
| 10.9187 | 14.5752 | 14.8974 | 30      | 14.599  | 30      | 30      |
| 10.2345 | 15.5631 | 15.7376 | 15.6591 | 13.2271 | 30      | 30      |
| 9.53322 | 30      | 15.8013 | 30      | 21.7943 | 30      | 30      |
| 10.994  | 14.9712 | 15.6972 | 30      | 30      | 30      | 16.7379 |
| 9.70782 | 15.6108 | 13.3228 | 30      | 30      | 30      | 30      |
| 10.2132 | 12.4464 | 13.3342 | 30      | 22.2754 | 30      | 30      |
| 11.6254 | 30      | 14.6766 | 30      | 30      | 30      | 30      |
| 11.8311 | 15.5497 | 30      | 30      | 30      | 30      | 30      |
| 9.76269 | 15.6787 | 15.5479 | 30      | 30      | 30      | 30      |
| 10.2396 | 15.1428 | 14.6118 | 15.1271 | 15.3869 | 30      | 24.1372 |
| 10.0914 | 14.7841 | 30      | 30      | 30      | 19.0662 | 16.3472 |
| 8.28217 | 12.8788 | 12.2173 | 16.044  | 15.3184 | 16.5091 | 16.2762 |
| 9.27879 | 13.5804 | 12.8465 | 30      | 30      | 30      | 14.7249 |
| 10.0975 | 15.3265 | 14.9191 | 30      | 30      | 30      | 30      |
| 9.51216 | 14.6208 | 13.3064 | 30      | 14.8822 | 30      | 16.638  |
| 10.5659 | 16.0811 | 15.4645 | 30      | 21.4283 | 30      | 30      |
| 9.98761 | 14.2958 | 15.7852 | 30      | 19.5359 | 30      | 30      |
| 10.6029 | 30      | 30      | 16.2018 | 16.0334 | 30      | 30      |
| 10.5188 | 13.8476 | 14.4145 | 30      | 15.0608 | 16.388  | 22.989  |
| 11.65   | 13.8377 | 30      | 30      | 30      | 14.9183 | 17.786  |

| Hes1_A54 | Hes1_A66 | Hes5_A78 | Hes5_A90 | Hif1a_A07 | Hif1a_A19 | Hopx_A31 |
|----------|----------|----------|----------|-----------|-----------|----------|
| 30       | 20.9388  | 30       | 30       | 15.2658   | 19.6834   | 15.1818  |
| 30       | 17.8703  | 30       | 18.4089  | 30        | 30        | 13.8908  |
| 30       | 30       | 30       | 30       | 30        | 15.1561   | 14.9732  |
| 30       | 30       | 17.8407  | 18.2821  | 15.2207   | 16.6625   | 12.2465  |
| 30       | 18.3487  | 18.3267  | 18.1343  | 13.4306   | 13.7732   | 13.2904  |
| 30       | 17.134   | 18.6798  | 18.458   | 15.2354   | 15.3232   | 13.8381  |
| 30       | 17.396   | 22.3796  | 17.7817  | 14.2829   | 15.3321   | 15.9502  |
| 30       | 20.9766  | 23.7875  | 30       | 30        | 30        | 15.2133  |
| 30       | 17.5996  | 18.0124  | 17.4749  | 15.3146   | 15.5505   | 13.1606  |
| 30       | 17.9632  | 17.3605  | 17.9935  | 15.3611   | 30        | 13.1388  |
| 30       | 30       | 18.9405  | 19.3916  | 13.4779   | 14.3772   | 13.1972  |
| 30       | 30       | 30       | 30       | 30        | 30        | 13.7558  |
| 30       | 30       | 21.4361  | 20.3998  | 30        | 21.3618   | 15.9089  |
| 30       | 18.3426  | 30       | 19.3333  | 30        | 30        | 16.496   |
| 30       | 30       | 20.2242  | 19.5307  | 13.38     | 13.545    | 13.511   |
| 30       | 30       | 18.1699  | 20.0956  | 14.4537   | 15.5186   | 15.9326  |
| 30       | 30       | 30       | 30       | 12.8704   | 13.9867   | 14.3775  |
| 15.5118  | 17.9534  | 16.9404  | 20.4918  | 15.3052   | 30        | 16.4284  |
| 30       | 30       | 30       | 30       | 14.5855   | 14.863    | 13.3364  |
| 30       | 17.2909  | 20.7944  | 19.6013  | 15.682    | 13.5589   | 13.4957  |
| 30       | 30       | 17.3222  | 18.057   | 30        | 30        | 20.0333  |
| 30       | 21.6278  | 19.2079  | 19.0428  | 15.0719   | 15.7317   | 15.478   |
| 30       | 30       | 30       | 24.0105  | 30        | 30        | 30       |
| 30       | 30       | 30       | 21.7537  | 13.1142   | 15.2109   | 15.7206  |
| 30       | 30       | 20.6212  | 20.2726  | 12.7029   | 15.2077   | 14.8102  |
| 30       | 17.6569  | 18.8712  | 18.4537  | 30        | 15.1476   | 30       |
| 30       | 19.3713  | 19.2512  | 19.4734  | 30        | 30        | 13.7975  |
| 16.2855  | 30       | 21.7924  | 20.1276  | 13.7982   | 14.6876   | 30       |
| 30       | 18.8958  | 30       | 30       | 14.2188   | 30        | 14.5398  |
| 30       | 22.4223  | 30       | 30       | 11.4765   | 30        | 12.7225  |
| 30       | 18.1619  | 30       | 30       | 15.1406   | 15.7072   | 30       |
| 16.9819  | 15.2184  | 30       | 30       | 30        | 14.399    | 12.5281  |
| 14.6258  | 13.8367  | 30       | 30       | 17.4757   | 14.3411   | 13.4695  |
| 30       | 30       | 21.5885  | 30       | 15.1398   | 16.3286   | 13.4821  |
| 30       | 23.0782  | 18.7009  | 19.5387  | 30        | 13.4836   | 12.9483  |
| 14.9427  | 14.001   | 30       | 30       | 13.287    | 30        | 13.9645  |
| 15.1895  | 30       | 30       | 30       | 15.2425   | 15.1686   | 14.3146  |
| 15.8697  | 13.6268  | 30       | 30       | 15.2388   | 13.497    | 14.4896  |
| 30       | 30       | 30       | 30       | 13.1325   | 13.9463   | 14.4379  |
| 18.7965  | 14.8248  | 30       | 30       | 14.5889   | 14.2621   | 30       |

|         |         |         |         |         |         |         |
|---------|---------|---------|---------|---------|---------|---------|
| 15.3176 | 30      | 30      | 30      | 30      | 30      | 14.4936 |
| 14.5755 | 14.9488 | 30      | 30      | 15.2854 | 13.353  | 14.7006 |
| 30      | 15.892  | 30      | 30      | 30      | 30      | 15.2529 |
| 14.8138 | 13.6492 | 30      | 30      | 13.809  | 13.884  | 14.3171 |
| 14.847  | 15.1961 | 30      | 21.1036 | 14.9497 | 30      | 12.9621 |
| 17.2221 | 20.6633 | 30      | 30      | 14.252  | 16.2913 | 13.7782 |
| 15.6604 | 13.9724 | 30      | 30      | 14.1285 | 30      | 14.993  |
| 13.5583 | 12.4906 | 30      | 30      | 15.1274 | 15.8702 | 13.8096 |
| 19.3584 | 24.6814 | 18.769  | 30      | 13.2969 | 15.4484 | 13.5483 |
| 30      | 30      | 30      | 23.8791 | 15.3432 | 30      | 14.9242 |
| 30      | 30      | 30      | 30      | 14.6085 | 30      | 17.8605 |
| 17.0469 | 15.8973 | 23.6125 | 21.6804 | 14.9251 | 15.1679 | 13.1714 |
| 15.3205 | 13.4005 | 30      | 30      | 14.199  | 16.27   | 13.1046 |
| 16.4057 | 13.5023 | 30      | 30      | 14.1848 | 13.9436 | 12.9343 |
| 12.4828 | 10.6963 | 30      | 30      | 12.0125 | 12.7893 | 12.1789 |
| 14.6186 | 13.697  | 30      | 21.3666 | 12.895  | 13.2372 | 13.4392 |
| 16.9093 | 30      | 30      | 30      | 30      | 30      | 13.3964 |
| 19.3768 | 15.7835 | 30      | 30      | 14.3535 | 15.337  | 13.3343 |
| 30      | 30      | 20.7059 | 19.9849 | 30      | 15.0223 | 14.9128 |
| 15.5427 | 19.9141 | 30      | 30      | 14.4675 | 30      | 13.6292 |
| 19.7196 | 15.995  | 19.8324 | 19.0136 | 30      | 14.3525 | 13.2681 |
| 30      | 16.795  | 30      | 30      | 15.4299 | 14.4225 | 15.9717 |
| 18.2038 | 30      | 30      | 30      | 30      | 14.9472 | 14.2197 |

| Hopx_A43 | Jag1_A55 | Jag1_A67 | Lgr5_A79 | Lgr5_A91 | Lrig1_A08 | Lrig1_A20 |
|----------|----------|----------|----------|----------|-----------|-----------|
| 14.9393  | 20.8258  | 30       | 30       | 30       | 30        | 30        |
| 13.902   | 30       | 30       | 30       | 30       | 30        | 21.9914   |
| 15.0211  | 18.5208  | 30       | 30       | 30       | 30        | 30        |
| 12.2958  | 23.4834  | 30       | 30       | 30       | 30        | 30        |
| 13.3548  | 17.8339  | 30       | 30       | 30       | 30        | 30        |
| 13.8055  | 20.9434  | 30       | 22.8999  | 30       | 16.5605   | 18.4988   |
| 15.9858  | 16.6579  | 30       | 30       | 30       | 30        | 30        |
| 15.1356  | 30       | 30       | 30       | 30       | 30        | 30        |
| 13.2346  | 23.1836  | 30       | 30       | 30       | 30        | 14.5155   |
| 13.1853  | 24.596   | 30       | 30       | 30       | 16.2918   | 30        |
| 13.3737  | 30       | 30       | 30       | 30       | 30        | 30        |
| 13.8445  | 30       | 30       | 30       | 30       | 30        | 30        |
| 16.0296  | 24.3852  | 30       | 30       | 30       | 14.9694   | 30        |
| 16.4463  | 30       | 30       | 30       | 30       | 30        | 15.8081   |
| 13.6293  | 30       | 30       | 30       | 30       | 15.5807   | 14.754    |
| 15.8271  | 30       | 30       | 30       | 30       | 30        | 30        |
| 14.5499  | 23.7583  | 30       | 30       | 30       | 30        | 14.7494   |
| 16.2386  | 17.9214  | 30       | 30       | 30       | 30        | 30        |
| 13.4055  | 30       | 30       | 30       | 30       | 30        | 15.414    |
| 13.6084  | 16.6217  | 14.7349  | 30       | 30       | 15.7893   | 30        |
| 20.7104  | 16.3412  | 30       | 30       | 30       | 15.3876   | 30        |
| 15.605   | 30       | 30       | 30       | 30       | 30        | 30        |
| 30       | 30       | 30       | 30       | 30       | 17.6786   | 30        |
| 15.4506  | 30       | 30       | 30       | 30       | 14.2487   | 30        |
| 14.7401  | 24.7591  | 30       | 30       | 30       | 16.2703   | 30        |
| 30       | 20.8137  | 30       | 30       | 30       | 30        | 30        |
| 13.6818  | 30       | 30       | 30       | 30       | 30        | 30        |
| 30       | 22.384   | 30       | 30       | 30       | 30        | 30        |
| 14.5427  | 30       | 30       | 30       | 30       | 16.3324   | 30        |
| 12.7614  | 30       | 30       | 30       | 30       | 15.2052   | 13.3705   |
| 30       | 16.3584  | 30       | 30       | 30       | 30        | 30        |
| 12.5822  | 30       | 30       | 15.8859  | 30       | 12.2181   | 13.1025   |
| 13.7028  | 16.936   | 30       | 30       | 30       | 15.6859   | 15.6662   |
| 13.3818  | 30       | 30       | 30       | 30       | 15.1671   | 14.4062   |
| 12.9395  | 30       | 30       | 30       | 30       | 13.9914   | 14.08     |
| 14.0495  | 24.698   | 30       | 30       | 30       | 15.0794   | 12.2692   |
| 14.3162  | 30       | 30       | 22.5543  | 30       | 15.0118   | 13.663    |
| 14.4692  | 30       | 30       | 30       | 30       | 13.742    | 30        |
| 14.5788  | 17.4272  | 15.8204  | 30       | 30       | 15.1052   | 21.023    |
| 30       | 16.6395  | 14.3162  | 30       | 30       | 16.5317   | 13.0536   |



|         |         |         |         |         |         |         |
|---------|---------|---------|---------|---------|---------|---------|
| 14.5885 | 16.2658 | 15.7449 | 30      | 30      | 13.6539 | 13.1656 |
| 14.722  | 30      | 30      | 30      | 30      | 15.4335 | 12.2314 |
| 15.5193 | 30      | 30      | 30      | 30      | 30      | 14.5888 |
| 14.2756 | 30      | 30      | 30      | 30      | 14.4094 | 14.0689 |
| 13.0136 | 30      | 17.8523 | 30      | 30      | 13.6281 | 11.313  |
| 13.7296 | 23.6906 | 15.5744 | 15.4512 | 30      | 14.0362 | 14.5524 |
| 15.148  | 30      | 30      | 30      | 30      | 14.3485 | 13.4756 |
| 13.822  | 30      | 30      | 30      | 30      | 19.1617 | 30      |
| 13.4917 | 30      | 30      | 30      | 30      | 14.2214 | 16.4389 |
| 15.1486 | 30      | 30      | 30      | 30      | 15.2199 | 30      |
| 17.8529 | 30      | 16.3276 | 30      | 30      | 15.6805 | 30      |
| 13.2018 | 16.9532 | 30      | 13.6322 | 30      | 13.4468 | 15.2935 |
| 13.1959 | 14.6084 | 30      | 14.7277 | 30      | 14.2482 | 13.8995 |
| 12.9374 | 30      | 30      | 30      | 30      | 13.8433 | 14.2768 |
| 12.1854 | 24.7285 | 15.5397 | 11.1287 | 13.371  | 11.5757 | 11.5882 |
| 13.429  | 17.8311 | 13.5998 | 30      | 30      | 14.757  | 15.3719 |
| 13.3414 | 30      | 30      | 30      | 30      | 13.8984 | 14.0262 |
| 13.4354 | 23.041  | 30      | 30      | 30      | 13.2913 | 13.846  |
| 15.0743 | 22.3202 | 30      | 30      | 30      | 15.487  | 30      |
| 13.6811 | 30      | 30      | 30      | 16.8412 | 15.5525 | 18.1198 |
| 13.4005 | 21.5614 | 30      | 15.0529 | 15.9068 | 13.9286 | 12.6492 |
| 16.2174 | 19.8368 | 30      | 30      | 30      | 30      | 14.6271 |
| 14.0467 | 30      | 30      | 30      | 30      | 15.7669 | 15.5344 |

| Lyz2_A32 | Lyz2_A44 | Msi1_A56 | Msi1_A68 | Msi2_A80 | Msi2_A92 | Myb_A09 |
|----------|----------|----------|----------|----------|----------|---------|
| 30       | 13.727   | 30       | 30       | 30       | 18.0225  | 30      |
| 24.7575  | 13.7873  | 30       | 30       | 30       | 30       | 30      |
| 30       | 13.7156  | 30       | 30       | 30       | 30       | 30      |
| 30       | 13.5519  | 15.4292  | 30       | 23.4408  | 30       | 30      |
| 30       | 13.3493  | 15.6692  | 30       | 14.2956  | 23.6575  | 30      |
| 30       | 14.3557  | 15.5461  | 30       | 30       | 15.6436  | 30      |
| 30       | 13.4516  | 30       | 30       | 30       | 30       | 30      |
| 30       | 12.4231  | 30       | 30       | 30       | 30       | 30      |
| 30       | 13.6468  | 30       | 22.1977  | 30       | 30       | 30      |
| 30       | 13.6108  | 30       | 30       | 30       | 16.6667  | 30      |
| 30       | 14.3069  | 30       | 30       | 30       | 23.8755  | 30      |
| 30       | 14.7897  | 30       | 30       | 30       | 17.0469  | 30      |
| 30       | 13.3655  | 30       | 30       | 30       | 30       | 30      |
| 30       | 14.3866  | 30       | 30       | 16.9809  | 30       | 30      |
| 30       | 16.0539  | 13.5026  | 30       | 13.2595  | 14.7774  | 30      |
| 30       | 13.2858  | 30       | 30       | 30       | 16.4832  | 30      |
| 30       | 13.8873  | 14.7186  | 16.0535  | 15.7725  | 30       | 30      |
| 30       | 13.825   | 30       | 30       | 30       | 30       | 30      |
| 30       | 14.6091  | 30       | 30       | 14.5583  | 22.7932  | 30      |
| 30       | 16.5413  | 30       | 30       | 15.9187  | 30       | 30      |
| 14.9628  | 13.2809  | 30       | 22.5101  | 30       | 30       | 30      |
| 30       | 13.5729  | 30       | 30       | 30       | 30       | 30      |
| 30       | 13.5686  | 30       | 30       | 30       | 30       | 30      |
| 30       | 15.9683  | 30       | 30       | 30       | 14.6716  | 30      |
| 30       | 14.886   | 30       | 30       | 30       | 15.8777  | 30      |
| 30       | 14.8105  | 30       | 30       | 14.8095  | 30       | 30      |
| 30       | 13.8978  | 30       | 30       | 30       | 30       | 30      |
| 22.6935  | 14.6613  | 30       | 30       | 30       | 30       | 30      |
| 30       | 15.1162  | 30       | 30       | 15.7754  | 24.2052  | 30      |
| 30       | 15.835   | 14.7214  | 30       | 30       | 20.9748  | 30      |
| 25.9014  | 14.4137  | 30       | 30       | 30       | 30       | 30      |
| 12.2888  | 11.029   | 14.3624  | 30       | 30       | 30       | 15.7599 |
| 11.5344  | 9.95857  | 14.677   | 30       | 15.9931  | 19.2801  | 30      |
| 11.7657  | 11.1097  | 30       | 30       | 15.6382  | 15.5955  | 30      |
| 10.8524  | 9.77929  | 14.0617  | 30       | 14.7711  | 15.8575  | 30      |
| 12.4148  | 11.6954  | 14.0323  | 16.8287  | 16.0301  | 19.1353  | 30      |
| 13.7491  | 12.6597  | 30       | 17.4483  | 14.4281  | 16.8015  | 30      |
| 11.2868  | 10.465   | 17.8097  | 30       | 13.44    | 16.1775  | 30      |
| 15.0252  | 12.816   | 30       | 30       | 30       | 15.5983  | 30      |
| 11.8856  | 11.0112  | 14.4909  | 30       | 13.9851  | 17.7112  | 15.2906 |

|         |         |         |         |         |         |         |
|---------|---------|---------|---------|---------|---------|---------|
| 11.5865 | 10.7492 | 15.7114 | 17.2107 | 15.7581 | 17.8588 | 14.6379 |
| 11.4973 | 10.2771 | 13.5857 | 30      | 14.8658 | 18.5931 | 13.907  |
| 13.015  | 11.8587 | 30      | 30      | 14.7723 | 16.1017 | 30      |
| 12.7027 | 11.1564 | 13.3431 | 14.8588 | 16.2658 | 18.5187 | 30      |
| 11.1197 | 9.65481 | 14.6441 | 30      | 14.2991 | 16.2081 | 14.742  |
| 11.5513 | 10.675  | 14.3903 | 14.7519 | 15.512  | 30      | 30      |
| 11.8905 | 11.5314 | 30      | 30      | 14.6267 | 17.9444 | 13.5765 |
| 15.5997 | 13.7718 | 30      | 30      | 30      | 30      | 30      |
| 11.3838 | 10.2913 | 14.5404 | 15.4658 | 14.9711 | 16.455  | 30      |
| 12.4913 | 11.2224 | 16.6411 | 16.1634 | 30      | 30      | 30      |
| 15.5815 | 13.9996 | 30      | 30      | 30      | 30      | 30      |
| 12.7379 | 11.5298 | 30      | 16.1093 | 14.6356 | 15.2276 | 15.3503 |
| 13.8626 | 12.2787 | 15.0388 | 17.1862 | 15.8742 | 30      | 30      |
| 12.0299 | 10.9112 | 13.959  | 30      | 14.8115 | 30      | 17.4106 |
| 12.0546 | 10.8786 | 13.4584 | 30      | 13.4311 | 14.221  | 11.4654 |
| 13.1535 | 11.8579 | 30      | 30      | 30      | 17.1426 | 15.4498 |
| 14.3714 | 12.3703 | 14.725  | 18.4324 | 15.835  | 30      | 30      |
| 12.2667 | 10.9083 | 15.8494 | 30      | 16.0567 | 16.3777 | 30      |
| 11.3833 | 10.9157 | 30      | 30      | 14.4966 | 30      | 30      |
| 18.3622 | 14.6826 | 14.2027 | 30      | 14.9045 | 16.0606 | 15.8225 |
| 12.9026 | 11.586  | 12.8277 | 15.2991 | 15.7551 | 15.978  | 14.0881 |
| 19.7652 | 30      | 13.7013 | 15.0985 | 13.7546 | 30      | 30      |
| 14.427  | 13.3508 | 14.2502 | 30      | 13.3848 | 16.261  | 30      |

| Myb_A21 | Myc_A33 | Myc_A45 | Notch1_A57 | Notch1_A69 | Numb_A81 | Numb_A93 |
|---------|---------|---------|------------|------------|----------|----------|
| 30      | 30      | 30      | 19.1408    | 30         | 30       | 15.4452  |
| 30      | 30      | 30      | 21.8566    | 30         | 30       | 30       |
| 30      | 30      | 30      | 18.1441    | 30         | 30       | 30       |
| 30      | 30      | 30      | 20.0758    | 30         | 15.4997  | 30       |
| 30      | 30      | 30      | 19.2369    | 30         | 14.475   | 14.7794  |
| 30      | 30      | 30      | 16.6008    | 30         | 30       | 30       |
| 30      | 30      | 30      | 17.5673    | 30         | 30       | 30       |
| 30      | 30      | 30      | 16.8086    | 30         | 30       | 14.1025  |
| 30      | 30      | 30      | 16.4054    | 30         | 30       | 30       |
| 30      | 30      | 30      | 30         | 30         | 30       | 30       |
| 30      | 30      | 30      | 20.6838    | 30         | 30       | 30       |
| 30      | 30      | 30      | 17.3708    | 30         | 30       | 30       |
| 30      | 30      | 30      | 30         | 30         | 30       | 30       |
| 30      | 30      | 30      | 17.8134    | 30         | 30       | 30       |
| 30      | 30      | 30      | 16.1026    | 30         | 15.4759  | 30       |
| 30      | 30      | 30      | 20.9881    | 30         | 20.4951  | 15.6938  |
| 30      | 30      | 30      | 30         | 30         | 14.7138  | 15.7025  |
| 30      | 30      | 30      | 21.3323    | 30         | 30       | 30       |
| 30      | 30      | 30      | 19.3701    | 30         | 30       | 30       |
| 30      | 30      | 30      | 17.613     | 30         | 30       | 30       |
| 30      | 30      | 30      | 18.0038    | 30         | 30       | 30       |
| 30      | 30      | 30      | 18.9554    | 30         | 30       | 30       |
| 30      | 30      | 30      | 18.441     | 30         | 30       | 30       |
| 30      | 30      | 30      | 22.2159    | 30         | 30       | 30       |
| 30      | 30      | 30      | 23.6561    | 30         | 16.6907  | 14.2447  |
| 30      | 30      | 30      | 30         | 30         | 30       | 30       |
| 30      | 30      | 30      | 18.1693    | 30         | 30       | 30       |
| 30      | 30      | 30      | 22.5069    | 30         | 30       | 30       |
| 30      | 30      | 30      | 18.2509    | 30         | 30       | 30       |
| 30      | 30      | 30      | 17.6212    | 30         | 16.2706  | 15.4958  |
| 30      | 30      | 30      | 19.8805    | 30         | 30       | 30       |
| 30      | 15.777  | 30      | 24.3948    | 30         | 30       | 30       |
| 30      | 30      | 16.136  | 14.7989    | 14.9942    | 30       | 30       |
| 30      | 13.4832 | 14.6265 | 20.4719    | 30         | 17.9455  | 15.8224  |
| 30      | 15.3044 | 15.1263 | 19.8176    | 30         | 22.359   | 14.8552  |
| 30      | 14.2865 | 13.9653 | 30         | 30         | 30       | 30       |
| 30      | 18.8848 | 15.7247 | 24.6721    | 30         | 30       | 30       |
| 30      | 30      | 15.1124 | 24.4447    | 30         | 30       | 14.7578  |
| 30      | 30      | 16.4663 | 22.8967    | 30         | 30       | 30       |
| 30      | 14.9481 | 16.1185 | 18.4689    | 30         | 14.3041  | 30       |

|         |         |         |         |         |         |         |
|---------|---------|---------|---------|---------|---------|---------|
| 14.6175 | 30      | 15.0395 | 30      | 30      | 30      | 30      |
| 18.5923 | 12.8429 | 13.1666 | 30      | 30      | 15.0591 | 14.174  |
| 30      | 30      | 30      | 21.0836 | 30      | 30      | 30      |
| 14.9902 | 30      | 30      | 30      | 30      | 30      | 30      |
| 30      | 30      | 30      | 24.3512 | 30      | 19.6395 | 14.5007 |
| 30      | 13.9566 | 14.4289 | 24.6779 | 30      | 15.7725 | 14.5023 |
| 15.7586 | 19.7968 | 30      | 15.8879 | 30      | 30      | 30      |
| 30      | 14.9347 | 15.531  | 15.0693 | 30      | 15.6091 | 15.4255 |
| 30      | 15.8692 | 15.5742 | 30      | 30      | 30      | 16.7151 |
| 30      | 30      | 30      | 19.7642 | 30      | 30      | 30      |
| 30      | 16.2522 | 30      | 19.2436 | 30      | 30      | 30      |
| 14.9237 | 15.6814 | 30      | 18.5187 | 30      | 16.7029 | 14.71   |
| 30      | 15.5002 | 14.8021 | 18.8565 | 30      | 30      | 30      |
| 30      | 30      | 30      | 17.9186 | 30      | 20.2349 | 30      |
| 11.7366 | 14.3718 | 14.5271 | 13.3404 | 13.2585 | 15.2455 | 13.272  |
| 14.8768 | 13.7329 | 12.4065 | 30      | 30      | 16.6191 | 15.1041 |
| 15.3616 | 15.6979 | 15.2377 | 30      | 30      | 30      | 30      |
| 30      | 30      | 15.1167 | 24.4316 | 30      | 30      | 13.7513 |
| 30      | 13.8877 | 30      | 17.4143 | 30      | 30      | 30      |
| 30      | 13.0489 | 13.0255 | 30      | 30      | 30      | 15.9882 |
| 15.8855 | 30      | 14.8694 | 30      | 30      | 15.3741 | 14.8428 |
| 15.6928 | 15.0847 | 14.5162 | 24.5139 | 30      | 30      | 14.9644 |
| 30      | 15.066  | 14.4751 | 23.4132 | 30      | 30      | 30      |

| Olfm4_A10 | Pcna_A34 | Pcna_A46 | Ppargc1b_A5 | Ppargc1b_A7 | Rhoa_A82 | Rhoa_A94 |
|-----------|----------|----------|-------------|-------------|----------|----------|
| 30        | 15.5595  | 14.4544  | 30          | 30          | 13.3887  | 14.6642  |
| 30        | 13.9319  | 30       | 30          | 30          | 15.4239  | 18.8887  |
| 30        | 15.6158  | 13.5582  | 30          | 30          | 13.0502  | 13.3336  |
| 17.1594   | 15.6437  | 30       | 30          | 30          | 14.0997  | 13.2047  |
| 30        | 12.4968  | 12.9862  | 30          | 15.4919     | 11.5322  | 12.6396  |
| 30        | 15.2396  | 15.4327  | 15.4679     | 30          | 13.4958  | 13.4553  |
| 30        | 14.1789  | 14.4008  | 30          | 30          | 18.0879  | 12.4333  |
| 15.8003   | 13.2519  | 14.5263  | 30          | 30          | 13.3271  | 13.6151  |
| 30        | 13.961   | 14.0031  | 15.4349     | 30          | 12.4811  | 14.0927  |
| 30        | 17.9767  | 15.1532  | 24.5953     | 30          | 14.4249  | 13.0277  |
| 30        | 15.5587  | 19.4427  | 30          | 30          | 12.1188  | 12.8462  |
| 30        | 15.1594  | 16.7341  | 30          | 30          | 18.5155  | 20.1625  |
| 30        | 14.4177  | 15.7373  | 30          | 30          | 12.6375  | 13.507   |
| 30        | 15.0531  | 30       | 30          | 30          | 13.569   | 13.892   |
| 30        | 19.6573  | 15.5764  | 30          | 14.7191     | 12.7031  | 13.4595  |
| 30        | 17.0112  | 14.8092  | 30          | 30          | 16.177   | 13.7644  |
| 30        | 15.3826  | 16.6464  | 30          | 30          | 12.7743  | 12.3297  |
| 30        | 17.5263  | 15.2242  | 27.8269     | 30          | 14.3597  | 15.8823  |
| 30        | 15.2431  | 16.9909  | 30          | 30          | 13.9599  | 13.0283  |
| 30        | 15.7879  | 15.5979  | 30          | 30          | 30       | 15.4761  |
| 30        | 14.3601  | 30       | 30          | 30          | 14.4766  | 12.7667  |
| 30        | 13.9547  | 13.6433  | 30          | 30          | 13.8749  | 16.3357  |
| 30        | 14.933   | 15.174   | 30          | 30          | 19.1782  | 15.032   |
| 30        | 30       | 30       | 30          | 30          | 13.3936  | 13.3139  |
| 14.73     | 14.6626  | 14.2851  | 30          | 30          | 13.2402  | 12.7224  |
| 30        | 14.4032  | 13.4968  | 30          | 30          | 14.268   | 14.9874  |
| 30        | 20.2165  | 14.4727  | 30          | 30          | 13.0605  | 14.6587  |
| 30        | 13.7749  | 14.5065  | 30          | 30          | 14.6006  | 13.5156  |
| 30        | 14.5845  | 14.0389  | 30          | 30          | 13.8182  | 13.9999  |
| 30        | 17.4822  | 15.3099  | 30          | 30          | 12.158   | 12.3285  |
| 30        | 30       | 14.9084  | 30          | 30          | 14.5837  | 13.3355  |
| 16.6879   | 14.0727  | 16.637   | 30          | 30          | 11.3608  | 12.2898  |
| 30        | 15.3693  | 13.2639  | 30          | 30          | 11.7224  | 13.3635  |
| 30        | 13.3276  | 14.5197  | 30          | 30          | 11.201   | 12.3272  |
| 30        | 15.6169  | 30       | 30          | 30          | 11.8703  | 12.6612  |
| 15.7416   | 13.1569  | 14.3694  | 30          | 30          | 12.3641  | 13.0126  |
| 30        | 14.2057  | 14.1972  | 30          | 30          | 11.6022  | 13.0101  |
| 16.002    | 14.221   | 13.9973  | 30          | 30          | 12.1624  | 13.841   |
| 15.2631   | 14.5326  | 13.9476  | 30          | 14.4956     | 11.4851  | 12.8099  |
| 14.7248   | 17.6387  | 15.6493  | 30          | 15.6347     | 12.3236  | 12.2722  |

|         |         |         |         |         |         |         |
|---------|---------|---------|---------|---------|---------|---------|
| 14.3351 | 17.9981 | 13.0398 | 30      | 30      | 12.6441 | 13.022  |
| 30      | 12.0525 | 12.2709 | 30      | 30      | 11.5835 | 12.2391 |
| 30      | 14.494  | 16.2744 | 30      | 30      | 11.8635 | 13.4202 |
| 14.0747 | 12.7322 | 13.7454 | 30      | 30      | 12.3502 | 13.8105 |
| 15.2903 | 13.3202 | 12.3808 | 30      | 30      | 12.343  | 12.9985 |
| 30      | 14.5168 | 13.5164 | 30      | 30      | 11.7925 | 12.593  |
| 14.4061 | 16.1537 | 17.2382 | 30      | 30      | 12.1195 | 14.0361 |
| 11.1775 | 14.1806 | 14.1433 | 30      | 30      | 11.641  | 12.129  |
| 30      | 13.8103 | 14.7236 | 30      | 14.6357 | 11.586  | 11.9275 |
| 15.23   | 30      | 30      | 30      | 30      | 12.6137 | 13.712  |
| 18.7781 | 15.2118 | 14.2007 | 30      | 30      | 12.6185 | 13.7975 |
| 30      | 14.4936 | 15.6905 | 30      | 30      | 12.4231 | 12.9585 |
| 12.2758 | 13.5493 | 14.6025 | 30      | 30      | 11.7924 | 13.2193 |
| 30      | 13.6161 | 12.6773 | 30      | 30      | 12.9853 | 12.9657 |
| 6.74412 | 11.768  | 12.4003 | 14.4258 | 14.6316 | 10.1724 | 10.9233 |
| 12.8536 | 14.7127 | 12.7139 | 30      | 30      | 11.2234 | 12.1036 |
| 14.8221 | 13.7252 | 13.9748 | 15.4779 | 15.58   | 11.1791 | 12.4353 |
| 12.2736 | 15.7945 | 14.2725 | 15.6159 | 15.7242 | 11.3387 | 12.7294 |
| 30      | 16.9422 | 17.2469 | 30      | 30      | 13.1796 | 12.5461 |
| 13.4551 | 13.1753 | 13.5783 | 30      | 30      | 11.6012 | 12.3863 |
| 30      | 14.4077 | 13.6856 | 30      | 30      | 11.6573 | 11.8292 |
| 30      | 14.4491 | 14.6754 | 30      | 30      | 12.0031 | 12.7556 |
| 14.5481 | 14.6399 | 30      | 30      | 16.2353 | 11.836  | 13.0462 |

| Saa2_A11 | Saa2_A23 | Sirt3_A35 | Sirt3_A47 | Sox9_A59 | Sox9_A71 | Tat_A83 |
|----------|----------|-----------|-----------|----------|----------|---------|
| 21.5019  | 14.0542  | 30        | 30        | 30       | 30       | 30      |
| 18.8057  | 14.2716  | 30        | 30        | 30       | 30       | 30      |
| 19.5627  | 12.7549  | 30        | 30        | 30       | 30       | 30      |
| 30       | 14.5303  | 30        | 15.5153   | 30       | 30       | 30      |
| 20.7125  | 14.4358  | 30        | 30        | 16.117   | 27.118   | 30      |
| 18.7888  | 13.3129  | 30        | 30        | 30       | 30       | 30      |
| 19.6575  | 13.339   | 30        | 30        | 30       | 30       | 30      |
| 17.3245  | 12.9394  | 30        | 30        | 30       | 30       | 26.4792 |
| 30       | 13.0748  | 30        | 30        | 30       | 30       | 30      |
| 21.5681  | 13.4325  | 30        | 30        | 30       | 30       | 30      |
| 30       | 30       | 30        | 30        | 15.0218  | 22.4211  | 30      |
| 18.7109  | 13.1635  | 30        | 30        | 30       | 30       | 30      |
| 16.9996  | 13.5087  | 30        | 30        | 30       | 30       | 30      |
| 20.149   | 14.2743  | 30        | 30        | 30       | 30       | 30      |
| 21.5365  | 14.5304  | 30        | 15.5492   | 13.7026  | 30       | 30      |
| 21.4812  | 13.5742  | 30        | 30        | 30       | 30       | 30      |
| 30       | 30       | 30        | 30        | 30       | 30       | 30      |
| 30       | 13.1633  | 30        | 30        | 30       | 30       | 30      |
| 21.4153  | 16.7406  | 30        | 14.0868   | 30       | 28.2048  | 30      |
| 17.8949  | 15.3885  | 30        | 30        | 30       | 30       | 30      |
| 30       | 14.1534  | 30        | 30        | 12.8684  | 30       | 30      |
| 20.594   | 13.2598  | 30        | 30        | 30       | 30       | 30      |
| 18.0234  | 14.7117  | 30        | 30        | 14.473   | 30       | 30      |
| 30       | 30       | 30        | 30        | 12.7917  | 26.2614  | 30      |
| 20.0879  | 15.7104  | 30        | 15.7824   | 14.9634  | 30       | 30      |
| 19.2865  | 15.1455  | 30        | 30        | 30       | 30       | 30      |
| 19.3046  | 13.7945  | 30        | 30        | 30       | 30       | 30      |
| 30       | 13.7226  | 22.0095   | 30        | 30       | 30       | 30      |
| 30       | 14.8247  | 30        | 30        | 15.9223  | 30       | 30      |
| 30       | 14.9059  | 30        | 30        | 30       | 30       | 30      |
| 17.1922  | 13.1368  | 30        | 30        | 16.3231  | 30       | 30      |
| 30       | 14.8532  | 30        | 30        | 12.7514  | 21.8566  | 30      |
| 30       | 13.908   | 30        | 30        | 14.3474  | 30       | 30      |
| 20.5541  | 16.0837  | 30        | 30        | 11.5933  | 21.3993  | 30      |
| 30       | 30       | 30        | 30        | 13.8464  | 24.0388  | 30      |
| 21.0973  | 15.3516  | 30        | 30        | 12.9132  | 23.8439  | 30      |
| 19.8422  | 14.5186  | 30        | 30        | 12.707   | 20.958   | 30      |
| 20.3941  | 16.3123  | 30        | 30        | 12.8199  | 22.2309  | 30      |
| 17.8164  | 14.5536  | 30        | 30        | 15.4612  | 30       | 30      |
| 30       | 18.9589  | 15.255    | 30        | 11.6674  | 20.6322  | 30      |



|         |         |         |         |         |         |    |
|---------|---------|---------|---------|---------|---------|----|
| 30      | 30      | 30      | 30      | 12.2903 | 22.6411 | 30 |
| 18.0181 | 13.6315 | 21.5367 | 30      | 11.101  | 21.8097 | 30 |
| 21.3564 | 15.3857 | 30      | 30      | 12.9253 | 22.1161 | 30 |
| 30      | 18.6286 | 30      | 30      | 10.7471 | 19.6158 | 30 |
| 30      | 15.5857 | 30      | 19.2506 | 12.9523 | 21.7385 | 30 |
| 18.7002 | 14.6069 | 30      | 30      | 12.46   | 22.4424 | 30 |
| 30      | 15.6877 | 30      | 30      | 12.9835 | 23.0104 | 30 |
| 18.9655 | 14.5116 | 30      | 30      | 12.0931 | 23.42   | 30 |
| 30      | 15.4236 | 30      | 30      | 13.1198 | 22.6636 | 30 |
| 21.297  | 16.0326 | 30      | 30      | 13.9547 | 25.791  | 30 |
| 30      | 18.3627 | 30      | 30      | 11.3019 | 24.976  | 30 |
| 30      | 18.7923 | 30      | 30      | 14.7485 | 25.9428 | 30 |
| 30      | 30      | 30      | 30      | 12.5082 | 20.4324 | 30 |
| 21.5757 | 23.2421 | 30      | 30      | 11.9236 | 21.4222 | 30 |
| 30      | 16.3216 | 16.8041 | 30      | 11.7242 | 20.3519 | 30 |
| 30      | 15.2921 | 30      | 30      | 12.7306 | 22.6505 | 30 |
| 30      | 15.6151 | 30      | 30      | 13.7501 | 22.9587 | 30 |
| 30      | 21.2377 | 30      | 30      | 10.3947 | 19.6275 | 30 |
| 30      | 15.4073 | 30      | 30      | 30      | 30      | 30 |
| 30      | 15.7654 | 30      | 30      | 12.1201 | 21.9809 | 30 |
| 21.7154 | 16.5737 | 30      | 15.615  | 10.6301 | 20.7853 | 30 |
| 30      | 30      | 30      | 30      | 23.4608 | 24.8809 | 30 |
| 30      | 30      | 30      | 30      | 11.8463 | 20.3316 | 30 |

| Tat_A95 | Tcf4_A12 | Tcf712_A24 | Tert_A36 | Tert_A48 | Wnt3_A60 | Wnt3_A72 |
|---------|----------|------------|----------|----------|----------|----------|
| 30      | 30       | 30         | 30       | 30       | 30       | 30       |
| 30      | 30       | 30         | 30       | 30       | 25.4182  | 20.8973  |
| 30      | 30       | 30         | 30       | 30       | 30       | 30       |
| 30      | 30       | 18.8176    | 30       | 30       | 30       | 30       |
| 30      | 30       | 21.5398    | 30       | 30       | 30       | 30       |
| 30      | 30       | 18.6058    | 30       | 30       | 30       | 30       |
| 30      | 14.2444  | 16.8575    | 30       | 30       | 30       | 30       |
| 30      | 30       | 18.391     | 30       | 30       | 30       | 20.9538  |
| 30      | 30       | 30         | 30       | 30       | 30       | 30       |
| 30      | 30       | 30         | 30       | 30       | 30       | 15.5751  |
| 30      | 15.0635  | 19.0506    | 30       | 30       | 30       | 16.5179  |
| 30      | 30       | 30         | 30       | 30       | 30       | 30       |
| 30      | 15.2273  | 30         | 30       | 30       | 30       | 30       |
| 30      | 30       | 30         | 30       | 30       | 30       | 18.3679  |
| 30      | 16.3463  | 18.9852    | 30       | 30       | 30       | 30       |
| 30      | 30       | 30         | 30       | 30       | 30       | 30       |
| 30      | 15.1963  | 30         | 30       | 30       | 30       | 17.8697  |
| 30      | 30       | 30         | 30       | 30       | 30       | 20.1477  |
| 30      | 30       | 20.5491    | 30       | 30       | 15.4094  | 24.6305  |
| 30      | 30       | 30         | 30       | 30       | 30       | 30       |
| 30      | 16.1532  | 21.3305    | 30       | 30       | 30       | 16.0152  |
| 30      | 30       | 30         | 30       | 30       | 30       | 30       |
| 30      | 30       | 30         | 30       | 30       | 13.315   | 30       |
| 30      | 30       | 30         | 30       | 30       | 30       | 30       |
| 30      | 30       | 17.8466    | 30       | 30       | 30       | 30       |
| 30      | 30       | 30         | 30       | 30       | 30       | 22.8196  |
| 30      | 30       | 17.7347    | 30       | 30       | 30       | 16.2496  |
| 30      | 30       | 30         | 30       | 30       | 12.6374  | 20.7541  |
| 30      | 30       | 18.3729    | 30       | 30       | 30       | 19.261   |
| 30      | 15.1148  | 18.991     | 30       | 30       | 15.4041  | 20.4278  |
| 30      | 30       | 30         | 30       | 30       | 30       | 30       |
| 30      | 30       | 30         | 30       | 30       | 13.7058  | 13.1287  |
| 30      | 14.2191  | 18.5761    | 30       | 30       | 15.0507  | 14.3301  |
| 30      | 15.9411  | 30         | 22.8158  | 30       | 13.2584  | 14.0965  |
| 30      | 14.7873  | 17.8203    | 30       | 30       | 13.1553  | 21.476   |
| 30      | 16.9318  | 30         | 30       | 30       | 13.4814  | 13.2333  |
| 30      | 30       | 30         | 30       | 30       | 14.648   | 16.1107  |
| 30      | 17.6279  | 30         | 30       | 30       | 13.4219  | 13.9261  |
| 30      | 16.4751  | 30         | 30       | 30       | 15.8767  | 14.6378  |
| 30      | 14.6981  | 19.6697    | 30       | 30       | 15.6126  | 13.6729  |

|    |         |         |    |    |         |         |
|----|---------|---------|----|----|---------|---------|
| 30 | 18.6275 | 18.3749 | 30 | 30 | 13.2579 | 13.6623 |
| 30 | 13.7195 | 18.908  | 30 | 30 | 12.5078 | 12.721  |
| 30 | 17.2859 | 18.339  | 30 | 30 | 14.4876 | 14.1177 |
| 30 | 17.2273 | 18.7139 | 30 | 30 | 15.1309 | 14.472  |
| 30 | 14.8027 | 17.5314 | 30 | 30 | 12.2442 | 13.2667 |
| 30 | 12.3585 | 19.0334 | 30 | 30 | 13.565  | 14.3436 |
| 30 | 16.1014 | 30      | 30 | 30 | 13.4102 | 13.7068 |
| 30 | 17.2252 | 22.9356 | 30 | 30 | 12.5657 | 13.0631 |
| 30 | 13.5952 | 18.6432 | 30 | 30 | 14.0447 | 14.4542 |
| 30 | 16.1824 | 17.8487 | 30 | 30 | 14.6087 | 13.9391 |
| 30 | 16.8266 | 30      | 30 | 30 | 14.5391 | 15.959  |
| 30 | 15.696  | 18.0406 | 30 | 30 | 10.9318 | 12.3231 |
| 30 | 13.8094 | 17.1005 | 30 | 30 | 12.1297 | 12.6003 |
| 30 | 30      | 18.9706 | 30 | 30 | 12.6451 | 13.4552 |
| 30 | 12.8234 | 17.3531 | 30 | 30 | 14.4341 | 15.8761 |
| 30 | 14.5749 | 18.4281 | 30 | 30 | 12.6532 | 14.9248 |
| 30 | 13.6416 | 21.379  | 30 | 30 | 12.4638 | 12.615  |
| 30 | 15.4007 | 19.8076 | 30 | 30 | 12.4794 | 12.6217 |
| 30 | 16.3432 | 17.4093 | 30 | 30 | 15.3617 | 15.8749 |
| 30 | 30      | 30      | 30 | 30 | 15.6312 | 14.3916 |
| 30 | 14.9671 | 18.0453 | 30 | 30 | 13.5983 | 12.6502 |
| 30 | 14.5746 | 23.3139 | 30 | 30 | 30      | 15.9246 |
| 30 | 15.6434 | 20.6709 | 30 | 30 | 16.8261 | 13.9115 |

| Wnt6_A84 | Wnt6_A96 |
|----------|----------|
| 30       | 22.1295  |
| 30       | 30       |
| 30       | 23.7902  |
| 30       | 30       |
| 30       | 30       |
| 30       | 24.0011  |
| 30       | 30       |
| 30       | 23.1416  |
| 30       | 30       |
| 30       | 21.8758  |
| 30       | 30       |
| 30       | 30       |
| 30       | 26.8183  |
| 30       | 25.3487  |
| 30       | 30       |
| 30       | 30       |
| 30       | 30       |
| 30       | 30       |
| 30       | 30       |
| 30       | 30       |
| 30       | 30       |
| 30       | 30       |
| 30       | 23.0212  |
| 30       | 30       |
| 30       | 30       |
| 30       | 30       |
| 30       | 22.4579  |
| 30       | 30       |
| 30       | 30       |
| 30       | 30       |
| 30       | 30       |
| 30       | 30       |
| 30       | 25.983   |
| 30       | 30       |
| 30       | 30       |
| 30       | 30       |
| 30       | 30       |
| 30       | 30       |
| 30       | 21.9776  |
| 30       | 30       |



| sampleID | Group   | Areg_A01 | Areg_A13 | Ascl2_A25 | Ascl2_A37 |
|----------|---------|----------|----------|-----------|-----------|
| S01      | H2B-GFP | 30       | 24.2079  | 30        | 30        |
| S02      | H2B-GFP | 30       | 30       | 12.2617   | 30        |
| S03      | H2B-GFP | 30       | 30       | 30        | 30        |
| S04      | H2B-GFP | 30       | 30       | 22.9874   | 30        |
| S05      | H2B-GFP | 30       | 30       | 30        | 30        |
| S06      | H2B-GFP | 30       | 30       | 30        | 30        |
| S07      | H2B-GFP | 30       | 30       | 30        | 30        |
| S08      | H2B-GFP | 28.3674  | 30       | 30        | 30        |
| S09      | H2B-GFP | 30       | 30       | 30        | 30        |
| S10      | H2B-GFP | 24.3889  | 12.7059  | 30        | 30        |
| S11      | H2B-GFP | 30       | 15.3013  | 30        | 30        |
| S12      | H2B-GFP | 30       | 30       | 30        | 30        |
| S13      | H2B-GFP | 30       | 30       | 30        | 30        |
| S14      | H2B-GFP | 30       | 16.2978  | 30        | 30        |
| S15      | H2B-GFP | 30       | 30       | 30        | 30        |
| S16      | H2B-GFP | 30       | 30       | 30        | 30        |
| S17      | H2B-GFP | 27.9683  | 14.2693  | 30        | 30        |
| S18      | H2B-GFP | 30       | 30       | 30        | 30        |
| S19      | H2B-GFP | 30       | 30       | 11.9927   | 14.8939   |
| S20      | H2B-GFP | 30       | 16.082   | 30        | 30        |
| S21      | H2B-GFP | 30       | 30       | 23.5652   | 30        |
| S22      | H2B-GFP | 30       | 30       | 30        | 30        |
| S23      | H2B-GFP | 30       | 30       | 24.9689   | 30        |
| S24      | H2B-GFP | 30       | 30       | 30        | 30        |
| S25      | H2B-GFP | 30       | 30       | 30        | 30        |
| S26      | H2B-GFP | 26.4124  | 13.7924  | 30        | 30        |
| S27      | H2B-GFP | 24.7767  | 12.634   | 30        | 30        |
| S28      | H2B-GFP | 30       | 30       | 30        | 30        |
| S29      | H2B-GFP | 30       | 30       | 30        | 30        |
| S30      | H2B-GFP | 30       | 30       | 27.2857   | 30        |
| S31      | H2B-GFP | 30       | 30       | 30        | 30        |
| S32      | H2B-GFP | 30       | 30       | 30        | 30        |
| S33      | H2B-GFP | 30       | 24.0872  | 30        | 30        |
| S34      | H2B-GFP | 30       | 30       | 30        | 30        |
| S35      | H2B-GFP | 30       | 30       | 30        | 30        |
| S36      | H2B-GFP | 30       | 30       | 30        | 30        |
| S37      | H2B-GFP | 30       | 14.7914  | 30        | 30        |
| S38      | H2B-GFP | 30       | 30       | 30        | 30        |
| S39      | H2B-GFP | 26.6015  | 12.5795  | 13.5694   | 16.0797   |
| S40      | H2B-GFP | 30       | 30       | 30        | 30        |

|     |         |         |         |         |         |
|-----|---------|---------|---------|---------|---------|
| S41 | H2B-GFP | 30      | 30      | 30      | 30      |
| S42 | H2B-GFP | 30      | 30      | 30      | 30      |
| S43 | H2B-GFP | 30      | 30      | 30      | 30      |
| S44 | H2B-GFP | 30      | 15.5506 | 30      | 30      |
| S45 | H2B-GFP | 30      | 30      | 30      | 30      |
| S46 | H2B-GFP | 30      | 30      | 30      | 30      |
| S47 | H2B-GFP | 30      | 14.8361 | 30      | 30      |
| S48 | H2B-GFP | 30      | 30      | 30      | 30      |
| S49 | H2B-GFP | 30      | 30      | 30      | 30      |
| S50 | H2B-GFP | 30      | 30      | 30      | 30      |
| S51 | H2B-GFP | 30      | 30      | 30      | 30      |
| S52 | H2B-GFP | 30      | 30      | 30      | 30      |
| S54 | H2B-GFP | 30      | 30      | 30      | 30      |
| S55 | H2B-GFP | 30      | 30      | 23.3759 | 30      |
| S56 | H2B-GFP | 30      | 30      | 20.7958 | 30      |
| S57 | H2B-GFP | 30      | 30      | 30      | 30      |
| S58 | H2B-GFP | 30      | 30      | 30      | 30      |
| S59 | H2B-GFP | 30      | 30      | 30      | 30      |
| S60 | H2B-GFP | 30      | 13.466  | 30      | 30      |
| S61 | H2B-GFP | 30      | 30      | 30      | 30      |
| S62 | H2B-GFP | 30      | 30      | 30      | 30      |
| S63 | H2B-GFP | 30      | 16.1693 | 30      | 30      |
| S64 | H2B-GFP | 30      | 16.0652 | 30      | 30      |
| S65 | H2B-GFP | 30      | 19.3733 | 30      | 30      |
| S66 | H2B-GFP | 30      | 30      | 30      | 14.0695 |
| S67 | H2B-GFP | 30      | 30      | 30      | 30      |
| S68 | H2B-GFP | 30      | 30      | 30      | 30      |
| S69 | H2B-GFP | 30      | 15.0803 | 13.604  | 30      |
| S70 | H2B-GFP | 30      | 30      | 30      | 30      |
| S71 | H2B-GFP | 30      | 30      | 30      | 30      |
| S72 | H2B-GFP | 30      | 30      | 30      | 30      |
| S73 | H2B-GFP | 30      | 30      | 30      | 30      |
| S74 | H2B-GFP | 30      | 30      | 30      | 30      |
| S75 | H2B-GFP | 30      | 30      | 30      | 30      |
| S76 | H2B-GFP | 30      | 30      | 30      | 30      |
| S77 | H2B-GFP | 28.8786 | 16.1145 | 30      | 30      |
| S78 | H2B-GFP | 30      | 30      | 30      | 30      |
| S79 | H2B-GFP | 30      | 30      | 30      | 30      |
| S80 | H2B-GFP | 30      | 30      | 30      | 30      |
| S81 | H2B-GFP | 30      | 30      | 30      | 30      |
| S82 | H2B-GFP | 30      | 30      | 30      | 30      |

|     |         |         |         |         |         |
|-----|---------|---------|---------|---------|---------|
| S83 | H2B-GFP | 30      | 30      | 30      | 30      |
| S84 | H2B-GFP | 30      | 30      | 30      | 30      |
| S85 | H2B-GFP | 30      | 30      | 30      | 30      |
| S86 | H2B-GFP | 30      | 30      | 13.1719 | 15.8412 |
| S87 | H2B-GFP | 30      | 17.0793 | 30      | 30      |
| S88 | H2B-GFP | 30      | 15.0964 | 24.3157 | 30      |
| S89 | H2B-GFP | 30      | 30      | 30      | 30      |
| S90 | H2B-GFP | 26.5817 | 14.1917 | 30      | 30      |
| S91 | H2B-GFP | 30      | 30      | 30      | 30      |
| S92 | H2B-GFP | 28.899  | 16.0351 | 30      | 30      |
| S93 | H2B-GFP | 30      | 16.1086 | 30      | 30      |
| S94 | H2B-GFP | 30      | 16.2729 | 30      | 30      |
| S95 | H2B-GFP | 30      | 16.4337 | 30      | 30      |
| S96 | H2B-GFP | 30      | 30      | 30      | 30      |



| <b>Atoh1_A49</b> | <b>Atoh1_A61</b> | <b>Axin2_A73</b> | <b>Axin2_A85</b> | <b>Bmi1_A02</b> | <b>Bmi1_A14</b> | <b>Bmpr1a_A26</b> |
|------------------|------------------|------------------|------------------|-----------------|-----------------|-------------------|
| 15.0587          | 30               | 30               | 30               | 15.7978         | 13.2333         | 30                |
| 12.915           | 12.5596          | 10.0976          | 12.3245          | 13.346          | 12.1094         | 12.2421           |
| 30               | 30               | 30               | 30               | 15.1525         | 13.5301         | 30                |
| 11.47            | 10.7464          | 12.7098          | 19.9501          | 11.9822         | 13.1094         | 12.8486           |
| 11.4445          | 10.556           | 13.403           | 16.3839          | 15.9508         | 12.0564         | 14.238            |
| 17.3269          | 30               | 30               | 30               | 30              | 30              | 30                |
| 10.3396          | 9.88074          | 30               | 30               | 14.5904         | 15.0657         | 12.7268           |
| 9.0845           | 8.60569          | 12.8311          | 16.0426          | 14.9765         | 13.5907         | 13.6746           |
| 8.69729          | 8.31604          | 13.6449          | 17.1572          | 12.8262         | 12.8764         | 13.007            |
| 11.4642          | 11.5736          | 13.815           | 15.958           | 30              | 30              | 13.3954           |
| 11.0235          | 9.88058          | 15.3434          | 15.7609          | 13.1788         | 13.6906         | 15.5958           |
| 9.06654          | 8.63097          | 12.1201          | 16.586           | 12.3266         | 12.558          | 14.388            |
| 13.1813          | 12.5655          | 12.6176          | 14.6828          | 15.6837         | 15.0395         | 30                |
| 10.998           | 9.90576          | 14.6222          | 17.3976          | 12.722          | 12.5829         | 12.7509           |
| 11.2842          | 11.1216          | 12.6971          | 13.5951          | 13.9025         | 14.1177         | 12.9365           |
| 11.9884          | 10.6885          | 13.0896          | 17.3298          | 13.2731         | 12.3106         | 12.4767           |
| 12.5853          | 11.6814          | 12.4851          | 14.6452          | 12.7889         | 12.9413         | 14.2289           |
| 10.751           | 9.83201          | 11.1511          | 14.8352          | 19.3365         | 14.9893         | 15.747            |
| 10.9081          | 10.0506          | 10.1231          | 12.6516          | 14.4912         | 12.365          | 11.3694           |
| 12.5843          | 11.6859          | 12.6315          | 16.0285          | 13.3346         | 11.9749         | 12.9051           |
| 11.1136          | 11.0394          | 13.1662          | 13.396           | 12.5294         | 30              | 12.8912           |
| 9.58832          | 9.44264          | 30               | 30               | 13.9275         | 13.5712         | 15.0882           |
| 11.9511          | 11.1676          | 14.8949          | 30               | 11.6895         | 12.0391         | 30                |
| 10.2352          | 10.4168          | 14.0783          | 16.0795          | 12.2236         | 14.9964         | 13.8491           |
| 11.8885          | 11.8408          | 12.9378          | 14.8266          | 13.2018         | 12.5682         | 13.3884           |
| 10.325           | 9.8019           | 13.4488          | 14.7967          | 12.7303         | 13.879          | 13.6992           |
| 12.3932          | 11.7422          | 12.8062          | 16.4608          | 18.6734         | 15.0001         | 12.9005           |
| 11.4944          | 12.3768          | 30               | 14.1656          | 13.4332         | 13.9051         | 12.8557           |
| 10.408           | 10.53            | 14.2683          | 18.3662          | 15.1731         | 14.5932         | 13.8664           |
| 12.3013          | 11.1837          | 13.645           | 15.9777          | 13.0818         | 11.8747         | 12.887            |
| 9.94215          | 9.65781          | 14.0234          | 15.6274          | 13.0902         | 13.9814         | 13.8571           |
| 10.7464          | 10.5109          | 13.7294          | 18.331           | 12.7735         | 11.4597         | 12.3096           |
| 13.3567          | 11.1389          | 30               | 16.4985          | 12.5652         | 14.7999         | 14.1854           |
| 10.8244          | 10.6847          | 14.965           | 15.1734          | 13.8829         | 18.9407         | 13.6546           |
| 12.373           | 13.0228          | 30               | 16.1191          | 17.9824         | 13.0173         | 12.6281           |
| 11.8071          | 10.2338          | 14.8668          | 19.4725          | 12.6531         | 13.8263         | 14.289            |
| 10.4373          | 10.7564          | 30               | 30               | 17.516          | 15.2159         | 13.0035           |
| 10.7369          | 9.49758          | 15.0779          | 30               | 13.1596         | 13.286          | 12.9432           |
| 12.5404          | 11.8243          | 8.97872          | 11.2571          | 12.5753         | 11.9059         | 10.5274           |
| 9.65709          | 9.29679          | 11.9878          | 13.9132          | 12.0516         | 12.3994         | 12.8958           |

|         |         |         |         |         |         |         |
|---------|---------|---------|---------|---------|---------|---------|
| 12.2016 | 11.575  | 12.8    | 16.9794 | 17.6244 | 12.5362 | 13.0344 |
| 11.8031 | 11.624  | 11.7498 | 14.1696 | 13.3871 | 13.7651 | 12.9533 |
| 13.3374 | 13.1211 | 12.3898 | 14.725  | 13.1113 | 12.2395 | 12.5808 |
| 12.991  | 12.6168 | 12.7816 | 14.6816 | 16.7433 | 12.0913 | 13.8258 |
| 12.1534 | 12.4656 | 30      | 30      | 13.3746 | 11.8799 | 15.3941 |
| 10.2564 | 9.92801 | 12.7157 | 15.6847 | 11.9565 | 11.4908 | 12.1564 |
| 10.8862 | 10.5485 | 14.2747 | 18.2891 | 21.57   | 13.9573 | 15.3011 |
| 12.9781 | 11.9533 | 13.675  | 15.977  | 14.7128 | 12.6571 | 15.3666 |
| 11.0292 | 11.0742 | 14.9366 | 15.348  | 14.0627 | 13.5234 | 30      |
| 10.9594 | 10.4427 | 14.2663 | 18.5133 | 13.3748 | 13.8223 | 13.2161 |
| 11.097  | 10.5559 | 12.4578 | 14.1545 | 12.3097 | 11.945  | 30      |
| 23.5024 | 15.9956 | 30      | 30      | 18.132  | 19.1533 | 30      |
| 13.479  | 12.6781 | 14.3188 | 15.3707 | 12.2983 | 17.2771 | 30      |
| 11.0299 | 10.3259 | 30      | 30      | 13.7937 | 13.4498 | 15.0376 |
| 30      | 30      | 24.2573 | 30      | 16.4376 | 14.8716 | 30      |
| 12.3263 | 10.1786 | 15.6808 | 16.6398 | 14.7435 | 16.305  | 14.9305 |
| 12.0089 | 11.2496 | 12.9762 | 14.9086 | 16.4219 | 17.5266 | 30      |
| 11.9327 | 11.4304 | 12.2163 | 16.9904 | 13.1614 | 14.4409 | 14.3197 |
| 11.5989 | 11.3091 | 30      | 30      | 14.814  | 13.9398 | 12.0868 |
| 9.66034 | 9.8909  | 13.6098 | 17.3628 | 14.1285 | 11.4941 | 15.0166 |
| 10.8981 | 10.3763 | 13.8972 | 16.9459 | 13.303  | 11.8726 | 30      |
| 14.2485 | 12.7872 | 13.2808 | 16.9364 | 14.6242 | 12.6832 | 13.0147 |
| 12.6935 | 12.2341 | 15.505  | 18.3195 | 30      | 14.6587 | 13.0125 |
| 11.3355 | 10.903  | 14.6451 | 15.7624 | 13.1511 | 17.7925 | 13.3119 |
| 11.5227 | 11.9009 | 15.5178 | 30      | 12.1816 | 12.0238 | 12.6923 |
| 12.196  | 11.8353 | 30      | 30      | 21.489  | 30      | 14.0713 |
| 11.5907 | 11.8502 | 13.7616 | 17.5324 | 14.9046 | 19.7041 | 20.2047 |
| 11.138  | 11.5002 | 10.6883 | 12.7265 | 13.3611 | 11.5475 | 13.4692 |
| 15.024  | 12.2669 | 30      | 30      | 13.0983 | 13.425  | 14.205  |
| 12.4662 | 13.0868 | 30      | 15.6737 | 13.7782 | 12.9726 | 14.8383 |
| 12.4277 | 12.0431 | 16.3176 | 17.0278 | 13.1746 | 12.829  | 14.2173 |
| 11.107  | 11.7904 | 30      | 15.2242 | 14.4212 | 13.434  | 12.7919 |
| 9.9916  | 11.7045 | 30      | 30      | 18.7511 | 14.3112 | 13.0555 |
| 11.4241 | 10.978  | 11.8333 | 14.677  | 12.9555 | 12.1226 | 12.7987 |
| 11.4724 | 11.4305 | 13.2015 | 16.7759 | 12.6249 | 13.698  | 15.1218 |
| 12.2365 | 12.3447 | 15.26   | 30      | 14.3045 | 12.8475 | 14.8761 |
| 11.8933 | 11.9742 | 14.6893 | 17.3656 | 14.8408 | 14.9593 | 15.2822 |
| 9.65321 | 9.4637  | 13.6111 | 15.2561 | 12.445  | 11.0165 | 14.0583 |
| 12.1579 | 11.7511 | 12.7613 | 18.1155 | 13.3433 | 30      | 13.01   |
| 11.7606 | 11.6403 | 15.2897 | 30      | 13.9084 | 13.6426 | 30      |
| 11.932  | 11.7474 | 30      | 30      | 30      | 17.9324 | 14.1407 |

|         |         |         |         |         |         |         |
|---------|---------|---------|---------|---------|---------|---------|
| 12.1634 | 11.6125 | 30      | 30      | 11.3419 | 12.3356 | 12.8877 |
| 15.5483 | 12.8117 | 15.3765 | 21.4234 | 12.9872 | 18.3888 | 30      |
| 13.0527 | 13.9896 | 30      | 30      | 12.6977 | 14.1773 | 14.1599 |
| 15.0489 | 15.199  | 9.55727 | 11.733  | 12.1137 | 12.6182 | 11.5288 |
| 11.5236 | 11.1873 | 15.0513 | 30      | 12.5409 | 13.1862 | 11.8769 |
| 12.5452 | 13.1336 | 14.5626 | 18.5561 | 13.4184 | 12.4112 | 14.0667 |
| 13.4091 | 12.097  | 30      | 15.7485 | 15.1401 | 11.3201 | 15.0914 |
| 13.1775 | 12.6631 | 14.8688 | 23.3089 | 14.3474 | 12.9249 | 15.4197 |
| 10.572  | 10.3333 | 30      | 30      | 13.0029 | 13.4016 | 12.5054 |
| 11.5988 | 11.8161 | 14.5329 | 17.2    | 12.7515 | 13.59   | 15.1735 |
| 12.0502 | 12.9735 | 30      | 30      | 14.054  | 12.5288 | 13.5856 |
| 12.6506 | 12.8539 | 30      | 30      | 19.6315 | 14.6268 | 14.3651 |
| 16.3933 | 13.1337 | 15.8537 | 17.8484 | 12.7587 | 12.5916 | 12.1952 |
| 13.4682 | 12.4306 | 30      | 30      | 14.8444 | 12.6474 | 30      |

| <b>Bmpr1a_A38</b> | <b>Ccnd1_A50</b> | <b>Ccnd1_A62</b> | <b>Cdkn1a_A74</b> | <b>Cdkn1a_A86</b> | <b>Cdx1_A03</b> | <b>Cdx1_A15</b> |
|-------------------|------------------|------------------|-------------------|-------------------|-----------------|-----------------|
| 30                | 30               | 24.3777          | 30                | 30                | 24.1857         | 30              |
| 12.763            | 14.3682          | 12.0539          | 9.6081            | 11.0302           | 15.5377         | 14.8489         |
| 30                | 30               | 22.9109          | 30                | 30                | 30              | 30              |
| 12.3532           | 30               | 30               | 10.99             | 11.2591           | 19.0273         | 18.2476         |
| 12.489            | 30               | 30               | 12.2404           | 14.3509           | 18.8151         | 15.9442         |
| 30                | 30               | 30               | 30                | 30                | 30              | 30              |
| 12.9345           | 30               | 30               | 13.3265           | 14.3269           | 17.3045         | 15.687          |
| 12.6519           | 30               | 14.9805          | 9.45515           | 10.0246           | 15.9766         | 15.2627         |
| 13.2342           | 30               | 30               | 9.72442           | 10.216            | 17.5555         | 17.6264         |
| 12.9997           | 30               | 30               | 12.3764           | 12.9306           | 18.2741         | 17.1809         |
| 15.1362           | 30               | 30               | 9.256             | 10.1596           | 19.0957         | 18.4653         |
| 13.8929           | 30               | 13.6204          | 9.73393           | 9.83929           | 19.0215         | 16.9291         |
| 12.9595           | 18.1594          | 12.6942          | 13.7887           | 15.0151           | 16.9227         | 15.3623         |
| 13.1735           | 15.0766          | 13.0584          | 13.3882           | 13.1463           | 15.3439         | 15.6941         |
| 12.423            | 16.042           | 14.9175          | 9.88514           | 10.4693           | 17.3009         | 17.5056         |
| 11.9422           | 30               | 30               | 10.3494           | 10.6859           | 17.7707         | 15.7754         |
| 13.3227           | 30               | 30               | 9.88071           | 10.2437           | 15.9362         | 16.0585         |
| 14.256            | 16.2361          | 30               | 14.4381           | 14.9357           | 17.0856         | 16.5153         |
| 11.6327           | 12.9163          | 10.339           | 12.6603           | 13.3681           | 15.4549         | 13.9917         |
| 13.6631           | 30               | 30               | 8.9429            | 9.66575           | 17.4193         | 16.1631         |
| 12.2576           | 18.3105          | 13.9523          | 17.6564           | 16.3411           | 18.3781         | 16.5686         |
| 16.0029           | 15.9545          | 30               | 9.9454            | 10.694            | 16.3312         | 15.6443         |
| 14.1236           | 16.0003          | 13.0006          | 13.7699           | 14.4198           | 17.1835         | 17.4186         |
| 12.7285           | 15.7413          | 14.9292          | 13.3993           | 13.2134           | 17.2525         | 18.9852         |
| 13.3892           | 30               | 15.4724          | 11.7267           | 12.476            | 17.1988         | 15.2751         |
| 15.1894           | 30               | 30               | 10.1245           | 10.5105           | 15.6458         | 15.9292         |
| 12.5787           | 30               | 30               | 11.6342           | 13.0429           | 15.8229         | 14.849          |
| 11.7549           | 19.4049          | 13.1429          | 15.4373           | 30                | 16.4406         | 16.2067         |
| 12.5818           | 30               | 14.8838          | 9.77543           | 10.4112           | 18.5425         | 19.0307         |
| 12.6081           | 30               | 30               | 10.2489           | 10.8558           | 17.1456         | 15.6488         |
| 13.6096           | 16.0428          | 30               | 11.5099           | 13.0634           | 16.7077         | 15.6404         |
| 13.1176           | 16.3535          | 14.6893          | 10.9548           | 11.0769           | 16.0661         | 14.5796         |
| 12.4659           | 30               | 30               | 12.4297           | 13.4031           | 17.2585         | 18.1621         |
| 13.6321           | 19.7775          | 30               | 8.5106            | 8.67583           | 15.8486         | 15.8362         |
| 12.9001           | 30               | 15.9215          | 12.8874           | 14.3682           | 16.5666         | 16.7731         |
| 13.1479           | 15.838           | 11.2258          | 11.5783           | 12.6619           | 15.9725         | 15.1311         |
| 14.0875           | 30               | 30               | 11.6485           | 12.9485           | 15.9832         | 15.6678         |
| 12.6676           | 30               | 30               | 10.5025           | 10.8905           | 15.7389         | 13.9678         |
| 11.0356           | 14.272           | 11.2398          | 11.7072           | 11.7074           | 14.232          | 13.2252         |
| 12.5736           | 30               | 30               | 10.4984           | 11.3079           | 16.3505         | 16.4878         |

|         |         |         |         |         |         |         |
|---------|---------|---------|---------|---------|---------|---------|
| 13.8491 | 30      | 30      | 9.62065 | 10.0881 | 16.7054 | 17.7992 |
| 13.2293 | 20.8607 | 14.9231 | 9.95058 | 10.4784 | 16.5333 | 15.1092 |
| 13.2968 | 19.2627 | 14.7651 | 11.7846 | 12.4945 | 17.1503 | 16.1014 |
| 12.6403 | 30      | 30      | 10.4707 | 11.1495 | 15.8089 | 15.0526 |
| 13.5825 | 15.1546 | 12.9655 | 10.2391 | 10.3645 | 16.4891 | 14.9229 |
| 12.0966 | 17.6639 | 13.9995 | 7.80684 | 7.94185 | 16.3302 | 16.0834 |
| 13.0292 | 15.048  | 14.0272 | 12.0314 | 12.8338 | 17.2867 | 16.3455 |
| 13.0447 | 20.7105 | 13.9869 | 13.9758 | 15.0933 | 16.441  | 15.9137 |
| 12.6225 | 23.2396 | 30      | 10.2659 | 10.9594 | 16.5731 | 18.7963 |
| 12.8449 | 30      | 14.6156 | 11.122  | 11.5299 | 17.0189 | 16.7613 |
| 12.5733 | 16.3133 | 13.2662 | 12.1625 | 12.8104 | 16.396  | 16.2159 |
| 30      | 30      | 30      | 30      | 30      | 30      | 30      |
| 13.5908 | 30      | 15.1286 | 11.717  | 14.3662 | 17.2358 | 14.7358 |
| 14.8987 | 30      | 30      | 13.5263 | 13.8067 | 15.7578 | 16.3956 |
| 30      | 30      | 30      | 30      | 30      | 30      | 30      |
| 13.5934 | 30      | 30      | 13.5091 | 15.0658 | 16.516  | 15.4494 |
| 13.0092 | 30      | 30      | 10.5151 | 11.3687 | 17.1812 | 18.5485 |
| 13.5183 | 30      | 13.3696 | 12.6101 | 13.6926 | 17.6284 | 16.0285 |
| 12.7759 | 14.9921 | 15.1702 | 13.2389 | 13.3114 | 16.7058 | 16.0517 |
| 13.3158 | 30      | 30      | 10.2517 | 10.9667 | 17.4159 | 15.1632 |
| 13.0602 | 30      | 22.3101 | 12.1169 | 12.5555 | 15.923  | 15.2368 |
| 13.4786 | 30      | 30      | 11.0397 | 11.6469 | 15.6718 | 15.6588 |
| 13.9439 | 30      | 30      | 9.20894 | 10.0233 | 17.1348 | 16.0494 |
| 12.7649 | 30      | 30      | 11.6359 | 11.6106 | 15.5128 | 15.3259 |
| 12.4621 | 30      | 15.1706 | 10.5242 | 11.3689 | 16.5021 | 17.3557 |
| 13.0881 | 30      | 30      | 10.4922 | 10.9745 | 15.6218 | 15.723  |
| 12.6739 | 30      | 30      | 10.6247 | 11.1432 | 16.2636 | 16.3461 |
| 12.8522 | 14.7752 | 12.1134 | 11.1321 | 12.1088 | 15.9025 | 14.4641 |
| 13.1392 | 30      | 30      | 10.9396 | 11.5889 | 16.2815 | 16.8648 |
| 13.8745 | 30      | 15.1702 | 11.8042 | 13.4809 | 18.077  | 17.6952 |
| 14.0239 | 30      | 30      | 12.0526 | 12.6616 | 16.7163 | 16.1841 |
| 11.869  | 17.0662 | 14.0293 | 11.7716 | 12.3321 | 16.0456 | 17.7269 |
| 12.3398 | 30      | 23.9387 | 15.4102 | 14.2034 | 15.9547 | 15.3775 |
| 12.0697 | 30      | 30      | 12.6939 | 12.1468 | 16.6729 | 16.0965 |
| 12.5761 | 30      | 21.3534 | 9.16658 | 10.2031 | 16.5612 | 15.0975 |
| 13.5217 | 19.6774 | 14.165  | 13.4044 | 13.2458 | 16.7914 | 15.8238 |
| 14.1127 | 30      | 30      | 12.7159 | 12.9179 | 17.7653 | 16.3139 |
| 13.5128 | 17.4084 | 13.3983 | 10.825  | 11.9704 | 15.7591 | 15.4353 |
| 14.4193 | 30      | 30      | 12.5533 | 13.4897 | 15.9027 | 17.3955 |
| 12.6922 | 18.9336 | 13.3196 | 13.7716 | 14.7828 | 16.1893 | 16.6689 |
| 12.9538 | 30      | 30      | 12.0772 | 12.1416 | 15.7098 | 15.706  |

|         |         |         |         |         |         |         |
|---------|---------|---------|---------|---------|---------|---------|
| 13.6817 | 16.185  | 30      | 12.3223 | 12.877  | 16.1943 | 15.7719 |
| 14.1398 | 30      | 30      | 12.668  | 13.2164 | 17.8421 | 30      |
| 15.2285 | 30      | 30      | 10.74   | 12.1715 | 18.0978 | 17.7232 |
| 11.0935 | 13.8138 | 10.582  | 11.431  | 11.9242 | 15.1978 | 14.2714 |
| 12.5674 | 30      | 13.8987 | 11.0792 | 11.55   | 16.6315 | 15.8485 |
| 13.5915 | 30      | 30      | 11.1158 | 11.802  | 16.4854 | 16.0918 |
| 22.3265 | 30      | 22.8751 | 10.5125 | 11.2062 | 16.2562 | 14.7643 |
| 13.5772 | 30      | 24.0868 | 9.99689 | 10.5408 | 16.2408 | 15.5482 |
| 12.5122 | 30      | 30      | 9.24193 | 9.69748 | 17.8075 | 18.0842 |
| 13.5888 | 20.8462 | 15.0557 | 11.1237 | 11.838  | 16.6749 | 17.8391 |
| 12.6512 | 17.6844 | 13.7747 | 10.5357 | 10.9835 | 15.3479 | 15.7813 |
| 13.1854 | 30      | 30      | 10.9568 | 11.7559 | 18.8063 | 18.3232 |
| 14.2801 | 30      | 30      | 12.6367 | 14.0798 | 17.2433 | 17.0073 |
| 14.3747 | 16.3675 | 23.5535 | 9.72789 | 10.3794 | 16.73   | 17.6956 |

| Chga_A27 | Chga_A39 | Cre_A22 | Cubn_A51 | Cubn_A63 | Dll4_A75 | Dll4_A87 |
|----------|----------|---------|----------|----------|----------|----------|
| 30       | 30       | 30      | 30       | 30       | 30       | 30       |
| 30       | 30       | 30      | 30       | 30       | 14.3122  | 15.052   |
| 30       | 30       | 30      | 30       | 30       | 30       | 30       |
| 30       | 30       | 30      | 30       | 30       | 30       | 15.3861  |
| 30       | 30       | 30      | 30       | 30       | 15.353   | 13.1813  |
| 30       | 24.4947  | 30      | 30       | 30       | 30       | 30       |
| 30       | 30       | 30      | 30       | 30       | 30       | 30       |
| 30       | 30       | 30      | 30       | 30       | 14.7442  | 13.5733  |
| 30       | 30       | 30      | 30       | 30       | 15.3449  | 15.1266  |
| 30       | 30       | 30      | 30       | 30       | 13.1212  | 13.8951  |
| 30       | 30       | 30      | 30       | 30       | 30       | 14.6592  |
| 30       | 30       | 30      | 30       | 30       | 30       | 30       |
| 30       | 30       | 30      | 30       | 24.6872  | 15.4224  | 16.3954  |
| 30       | 30       | 30      | 30       | 23.6821  | 11.4046  | 11.9748  |
| 30       | 30       | 30      | 30       | 30       | 30       | 16.5774  |
| 30       | 23.6497  | 30      | 30       | 30       | 13.9422  | 13.4394  |
| 30       | 30       | 30      | 30       | 30       | 13.713   | 12.6986  |
| 30       | 18.7801  | 30      | 30       | 30       | 30       | 30       |
| 30       | 30       | 30      | 30       | 30       | 12.9826  | 15.038   |
| 30       | 30       | 30      | 30       | 30       | 13.0801  | 14.7948  |
| 30       | 30       | 30      | 30       | 30       | 30       | 23.4913  |
| 30       | 30       | 30      | 30       | 30       | 12.9543  | 14.2696  |
| 30       | 30       | 30      | 30       | 30       | 30       | 16.0571  |
| 30       | 30       | 30      | 30       | 30       | 30       | 16.1116  |
| 30       | 30       | 30      | 30       | 30       | 12.1906  | 12.2012  |
| 30       | 22.7928  | 30      | 30       | 30       | 30       | 14.1373  |
| 30       | 30       | 30      | 30       | 30       | 15.1412  | 13.7304  |
| 30       | 30       | 30      | 30       | 30       | 30       | 30       |
| 30       | 30       | 30      | 30       | 30       | 15.3376  | 14.6221  |
| 30       | 30       | 30      | 30       | 30       | 20.435   | 14.0183  |
| 30       | 30       | 30      | 30       | 23.8603  | 30       | 15.8588  |
| 30       | 30       | 30      | 30       | 30       | 30       | 14.3935  |
| 30       | 30       | 30      | 30       | 30       | 13.2782  | 13.3106  |
| 30       | 30       | 30      | 30       | 30       | 30       | 30       |
| 30       | 30       | 30      | 30       | 30       | 30       | 14.7262  |
| 30       | 30       | 30      | 30       | 30       | 15.2487  | 15.8211  |
| 30       | 30       | 30      | 30       | 30       | 14.7259  | 12.1701  |
| 30       | 30       | 30      | 30       | 30       | 12.1031  | 12.223   |
| 30       | 30       | 30      | 30       | 30       | 30       | 16.3016  |
| 30       | 30       | 30      | 30       | 30       | 12.8271  | 12.8314  |

|    |    |    |         |         |         |         |
|----|----|----|---------|---------|---------|---------|
| 30 | 30 | 30 | 30      | 30      | 30      | 14.1538 |
| 30 | 30 | 30 | 30      | 30      | 13.2713 | 14.1345 |
| 30 | 30 | 30 | 30      | 30      | 14.942  | 13.9634 |
| 30 | 30 | 30 | 30      | 30      | 15.351  | 30      |
| 30 | 30 | 30 | 30      | 20.2902 | 30      | 30      |
| 30 | 30 | 30 | 30      | 30      | 15.1319 | 14.5922 |
| 30 | 30 | 30 | 30      | 30      | 15.381  | 15.1112 |
| 30 | 30 | 30 | 30      | 30      | 13.4958 | 30      |
| 30 | 30 | 30 | 30      | 30      | 14.9007 | 14.853  |
| 30 | 30 | 30 | 30      | 30      | 30      | 30      |
| 30 | 30 | 30 | 30      | 30      | 12.6347 | 12.1758 |
| 30 | 30 | 30 | 30      | 30      | 30      | 30      |
| 30 | 30 | 30 | 30      | 30      | 30      | 15.3172 |
| 30 | 30 | 30 | 30      | 30      | 30      | 14.8843 |
| 30 | 30 | 30 | 30      | 22.1225 | 30      | 30      |
| 30 | 30 | 30 | 30      | 30      | 13.0465 | 16.3913 |
| 30 | 30 | 30 | 30      | 30      | 13.923  | 14.3743 |
| 30 | 30 | 30 | 30      | 30      | 30      | 21.0996 |
| 30 | 30 | 30 | 30      | 24.0353 | 13.9764 | 30      |
| 30 | 30 | 30 | 30      | 30      | 14.4741 | 15.2909 |
| 30 | 30 | 30 | 30      | 30      | 14.4417 | 20.4785 |
| 30 | 30 | 30 | 30      | 30      | 14.7266 | 16.4287 |
| 30 | 30 | 30 | 30      | 30      | 12.7977 | 12.7933 |
| 30 | 30 | 30 | 30      | 30      | 12.2837 | 13.5074 |
| 30 | 30 | 30 | 30      | 30      | 12.5687 | 12.1567 |
| 30 | 30 | 30 | 30      | 30      | 13.0675 | 13.4761 |
| 30 | 30 | 30 | 30      | 30      | 30      | 14.6171 |
| 30 | 30 | 30 | 30      | 30      | 13.6223 | 13.9829 |
| 30 | 30 | 30 | 25.1148 | 30      | 13.5371 | 12.6428 |
| 30 | 30 | 30 | 30      | 30      | 13.1504 | 13.517  |
| 30 | 30 | 30 | 30      | 30      | 15.4957 | 14.8751 |
| 30 | 30 | 30 | 30      | 30      | 14.4361 | 13.3711 |
| 30 | 30 | 30 | 30      | 30      | 14.4704 | 13.7202 |
| 30 | 30 | 30 | 30      | 30      | 13.051  | 13.0455 |
| 30 | 30 | 30 | 30      | 30      | 12.0404 | 13.1997 |
| 30 | 30 | 30 | 30      | 30      | 13.2337 | 13.6318 |
| 30 | 30 | 30 | 30      | 30      | 14.0028 | 14.1528 |
| 30 | 30 | 30 | 30      | 30      | 13.7865 | 14.1877 |
| 30 | 30 | 30 | 30      | 30      | 16.2614 | 15.2028 |
| 30 | 30 | 30 | 30      | 30      | 30      | 13.6033 |
| 30 | 30 | 30 | 30      | 30      | 12.9367 | 13.1092 |



|    |    |    |    |         |         |         |
|----|----|----|----|---------|---------|---------|
| 30 | 30 | 30 | 30 | 30      | 12.9939 | 13.6832 |
| 30 | 30 | 30 | 30 | 30      | 13.567  | 15.3663 |
| 30 | 30 | 30 | 30 | 30      | 30      | 17.3907 |
| 30 | 30 | 30 | 30 | 30      | 14.5309 | 14.0015 |
| 30 | 30 | 30 | 30 | 30      | 12.4829 | 12.2568 |
| 30 | 30 | 30 | 30 | 30      | 15.407  | 14.4139 |
| 30 | 30 | 30 | 30 | 30      | 13.8501 | 13.0276 |
| 30 | 30 | 30 | 30 | 30      | 12.1918 | 13.6025 |
| 30 | 30 | 30 | 30 | 30      | 12.3482 | 14.6411 |
| 30 | 30 | 30 | 30 | 30      | 14.49   | 15.4472 |
| 30 | 30 | 30 | 30 | 30      | 14.5507 | 15.7226 |
| 30 | 30 | 30 | 30 | 30      | 15.4332 | 16.8533 |
| 30 | 30 | 30 | 30 | 22.8819 | 30      | 15.1441 |
| 30 | 30 | 30 | 30 | 30      | 15.2702 | 12.0144 |

| <b>Dvl2_A04</b> | <b>Dvl2_A16</b> | <b>Efnb1_A28</b> | <b>Efnb1_A40</b> | <b>Epas1_A52</b> | <b>Epas1_A64</b> | <b>Ephb2_A76</b> |
|-----------------|-----------------|------------------|------------------|------------------|------------------|------------------|
| 22.3049         | 30              | 30               | 30               | 30               | 21.3164          | 22.6504          |
| 30              | 30              | 12.2837          | 14.2945          | 14.9349          | 13.3594          | 10.6696          |
| 30              | 30              | 30               | 15.6716          | 30               | 30               | 20.312           |
| 30              | 30              | 14.452           | 14.6943          | 30               | 30               | 12.7428          |
| 15.4167         | 15.6166         | 15.2948          | 14.6401          | 30               | 30               | 13.4535          |
| 13.9066         | 14.5053         | 30               | 30               | 30               | 30               | 19.6318          |
| 21.5817         | 30              | 30               | 15.138           | 30               | 14.378           | 13.1173          |
| 30              | 30              | 13.5877          | 14.6752          | 14.9306          | 14.369           | 11.8611          |
| 30              | 15.5998         | 30               | 17.5631          | 14.3185          | 14.1175          | 18.6549          |
| 14.4293         | 14.3744         | 30               | 13.7572          | 15.9514          | 30               | 13.9701          |
| 15.3727         | 15.609          | 15.1465          | 18.4474          | 14.4228          | 24.0168          | 13.4931          |
| 30              | 30              | 15.3579          | 14.7662          | 30               | 30               | 14.9471          |
| 13.6659         | 15.415          | 15.2457          | 30               | 30               | 30               | 12.8996          |
| 15.2589         | 13.1781         | 15.495           | 15.6058          | 30               | 16.9585          | 14.2083          |
| 15.0612         | 15.5203         | 14.2536          | 15.8031          | 30               | 30               | 14.8981          |
| 14.2959         | 15.59           | 14.424           | 15.9093          | 14.8744          | 13.8125          | 13.5166          |
| 13.8755         | 15.3616         | 15.1843          | 30               | 30               | 13.0828          | 13.9687          |
| 30              | 17.1964         | 30               | 13.8173          | 14.3534          | 13.3163          | 22.6812          |
| 30              | 30              | 12.0633          | 12.6218          | 13.1704          | 11.9375          | 9.89208          |
| 15.3395         | 14.4082         | 12.6492          | 14.7164          | 15.9314          | 14.1653          | 12.9776          |
| 15.0212         | 15.3702         | 30               | 15.8506          | 19.1534          | 23.9339          | 13.8801          |
| 30              | 30              | 30               | 30               | 30               | 30               | 14.9956          |
| 21.9742         | 16.5731         | 14.247           | 14.9085          | 30               | 13.5158          | 13.5263          |
| 30              | 30              | 15.3537          | 16.675           | 14.1835          | 15.1955          | 12.0381          |
| 30              | 30              | 30               | 14.5505          | 30               | 15.4589          | 13.6237          |
| 15.0239         | 14.6582         | 30               | 14.007           | 15.4485          | 12.4817          | 12.6734          |
| 16.308          | 30              | 14.241           | 14.4993          | 22.3183          | 13.6819          | 13.2615          |
| 30              | 15.3231         | 14.4137          | 30               | 13.792           | 13.8327          | 13.8898          |
| 15.3633         | 15.6196         | 15.3135          | 30               | 15.7704          | 15.2856          | 21.9136          |
| 30              | 30              | 13.7621          | 14.6722          | 30               | 23.8422          | 12.2221          |
| 15.7181         | 30              | 18.3395          | 15.6704          | 16.4455          | 22.8761          | 12.7244          |
| 30              | 30              | 14.2355          | 13.7075          | 14.4099          | 15.5301          | 14.0134          |
| 24.001          | 30              | 13.0571          | 13.3295          | 30               | 30               | 12.3572          |
| 30              | 15.3988         | 30               | 15.5274          | 15.9157          | 14.4853          | 12.1924          |
| 30              | 30              | 13.3602          | 15.475           | 15.8445          | 15.5029          | 23.2226          |
| 30              | 30              | 23.6034          | 30               | 13.834           | 13.4794          | 12.2702          |
| 30              | 30              | 13.0851          | 13.4327          | 16.027           | 23.941           | 11.7917          |
| 14.3425         | 13.5388         | 14.3271          | 14.3104          | 30               | 30               | 12.2633          |
| 30              | 14.3247         | 11.5185          | 13.0467          | 12.7441          | 12.9014          | 10.1297          |
| 12.5132         | 15.5338         | 15.4209          | 14.3164          | 15.9541          | 30               | 13.4416          |

|         |         |         |         |         |         |         |
|---------|---------|---------|---------|---------|---------|---------|
| 15.2149 | 15.2621 | 14.3209 | 14.1537 | 15.9499 | 13.994  | 13.9129 |
| 21.9392 | 19.7618 | 14.2654 | 30      | 14.2765 | 16.3768 | 13.319  |
| 14.1244 | 14.4366 | 13.4798 | 15.6226 | 14.8968 | 30      | 13.8417 |
| 12.9575 | 14.08   | 15.3328 | 13.3764 | 15.725  | 14.5596 | 14.9331 |
| 14.3304 | 30      | 14.5364 | 20.7496 | 30      | 30      | 14.0803 |
| 20.9139 | 15.7117 | 13.3781 | 13.689  | 13.8151 | 12.6826 | 11.6534 |
| 17.6468 | 16.1096 | 13.3135 | 14.0806 | 14.4916 | 16.6629 | 15.148  |
| 14.347  | 14.5202 | 30      | 30      | 13.7073 | 13.149  | 14.7486 |
| 14.8419 | 16.0197 | 15.2848 | 16.676  | 13.4233 | 13.886  | 13.9494 |
| 30      | 30      | 15.3345 | 14.1117 | 15.4239 | 30      | 13.6125 |
| 30      | 30      | 15.0681 | 30      | 30      | 20.125  | 13.3806 |
| 14.0405 | 13.6043 | 30      | 30      | 30      | 30      | 20.6592 |
| 30      | 15.2446 | 30      | 30      | 30      | 30      | 13.2666 |
| 30      | 30      | 15.1064 | 16.8382 | 30      | 15.6657 | 13.3951 |
| 30      | 30      | 30      | 30      | 30      | 30      | 18.5361 |
| 30      | 15.3478 | 30      | 14.0935 | 30      | 30      | 19.8808 |
| 13.7833 | 15.3448 | 30      | 30      | 30      | 30      | 23.9769 |
| 13.8756 | 13.741  | 14.2082 | 17.3054 | 14.3094 | 30      | 12.1582 |
| 15.1207 | 30      | 15.0522 | 20.6479 | 30      | 30      | 14.3351 |
| 30      | 13.261  | 30      | 14.5012 | 15.9713 | 15.049  | 11.9996 |
| 14.997  | 15.1303 | 12.1493 | 16.9163 | 14.3765 | 14.5436 | 12.8023 |
| 22.4051 | 14.431  | 15.0223 | 16.0555 | 30      | 18.9837 | 13.4107 |
| 13.9474 | 13.7922 | 30      | 15.7004 | 30      | 30      | 13.0406 |
| 15.0849 | 15.3199 | 30      | 13.6684 | 30      | 30      | 11.6174 |
| 30      | 30      | 13.4149 | 13.8223 | 15.0752 | 14.9307 | 14.9421 |
| 30      | 30      | 30      | 15.4608 | 15.0436 | 14.298  | 11.9995 |
| 30      | 14.2695 | 30      | 21.8131 | 16.4389 | 15.4977 | 12.4703 |
| 14.3475 | 15.382  | 15.6376 | 13.3514 | 30      | 30      | 11.8437 |
| 13.6074 | 15.1215 | 15.0297 | 17.6586 | 30      | 30      | 13.9875 |
| 30      | 30      | 14.8722 | 30      | 14.9035 | 14.5939 | 14.1417 |
| 30      | 30      | 14.2484 | 17.4844 | 14.3352 | 15.6398 | 14.015  |
| 30      | 30      | 30      | 30      | 30      | 30      | 14.9632 |
| 30      | 30      | 13.4706 | 30      | 16.0441 | 22.6126 | 13.3962 |
| 30      | 14.5714 | 15.2096 | 14.5994 | 16.1278 | 23.1325 | 13.379  |
| 30      | 30      | 14.5242 | 30      | 30      | 22.4625 | 14.0523 |
| 30      | 14.3    | 30      | 13.9455 | 30      | 14.3194 | 12.8839 |
| 14.3505 | 30      | 14.2905 | 15.7692 | 30      | 24.1911 | 13.1928 |
| 30      | 30      | 12.0841 | 19.5021 | 14.2753 | 13.9862 | 13.1906 |
| 30      | 30      | 15.1789 | 15.9659 | 14.129  | 30      | 15.0544 |
| 30      | 30      | 30      | 15.6481 | 15.0425 | 30      | 12.5091 |
| 30      | 30      | 15.3158 | 14.8698 | 30      | 30      | 13.203  |

|         |         |         |         |         |         |         |
|---------|---------|---------|---------|---------|---------|---------|
| 30      | 30      | 15.2507 | 30      | 30      | 30      | 13.2868 |
| 30      | 30      | 30      | 23.7877 | 30      | 18.2639 | 13.7086 |
| 30      | 15.4353 | 30      | 30      | 30      | 24.2696 | 21.9976 |
| 15.0502 | 12.946  | 11.9277 | 15.0004 | 13.899  | 12.4287 | 11.6524 |
| 15.2678 | 14.4761 | 15.2643 | 13.511  | 14.5793 | 15.4098 | 15.0627 |
| 30      | 14.657  | 13.2402 | 13.9334 | 15.215  | 21.8372 | 20.8465 |
| 15.002  | 13.5608 | 14.0317 | 13.6972 | 13.8168 | 13.921  | 14.9928 |
| 13.2928 | 13.7774 | 15.0392 | 30      | 13.5862 | 13.097  | 12.5844 |
| 15.2936 | 14.2861 | 30      | 22.0725 | 30      | 23.8144 | 13.0779 |
| 30      | 17.0944 | 30      | 30      | 30      | 24.2239 | 13.4354 |
| 13.6158 | 30      | 15.2788 | 21.0963 | 14.5478 | 12.7596 | 12.4014 |
| 30      | 30      | 30      | 30      | 15.1408 | 23.3879 | 13.9531 |
| 30      | 15.4107 | 30      | 30      | 30      | 15.9744 | 13.2635 |
| 30      | 30      | 12.8348 | 14.9188 | 15.9426 | 13.9695 | 12.4417 |

| <b>Ephb2_A88</b> | <b>Ereg_A05</b> | <b>Ereg_A17</b> | <b>Fut2_A29</b> | <b>Fut2_A41</b> | <b>Gapdh_A53</b> | <b>Gapdh_A65</b> |
|------------------|-----------------|-----------------|-----------------|-----------------|------------------|------------------|
| 30               | 30              | 30              | 30              | 15.0521         | 10.8283          | 10.7776          |
| 12.476           | 30              | 30              | 30              | 15.8194         | 7.69362          | 7.56659          |
| 30               | 30              | 30              | 30              | 30              | 10.5139          | 10.4472          |
| 13.3621          | 30              | 30              | 30              | 15.9861         | 9.64157          | 9.58097          |
| 30               | 30              | 30              | 30              | 17.0883         | 9.35168          | 9.34558          |
| 30               | 30              | 30              | 30              | 30              | 10.5998          | 10.6802          |
| 14.3898          | 24.5824         | 30              | 30              | 19.2159         | 10.28            | 10.2396          |
| 14.8469          | 30              | 30              | 30              | 30              | 8.81509          | 8.76898          |
| 17.4242          | 30              | 30              | 30              | 17.2158         | 9.24163          | 9.32001          |
| 30               | 30              | 30              | 30              | 16.2215         | 10.4372          | 10.5112          |
| 14.8672          | 30              | 30              | 30              | 30              | 9.90866          | 9.89282          |
| 16.8662          | 30              | 30              | 30              | 30              | 9.19216          | 9.17553          |
| 14.8865          | 30              | 30              | 30              | 22.1655         | 9.5738           | 9.61092          |
| 15.9856          | 30              | 30              | 30              | 30              | 8.82795          | 8.81635          |
| 15.4579          | 30              | 30              | 30              | 21.5914         | 10.2814          | 10.1727          |
| 14.8878          | 30              | 30              | 30              | 30              | 9.269            | 9.25305          |
| 16.8562          | 30              | 30              | 30              | 30              | 9.11742          | 9.19537          |
| 16.284           | 30              | 30              | 30              | 18.1019         | 9.8068           | 9.79436          |
| 11.9551          | 30              | 30              | 30              | 30              | 6.8514           | 6.85644          |
| 14.3115          | 30              | 30              | 30              | 15.9442         | 10.2563          | 10.3172          |
| 15.4563          | 30              | 30              | 13.2061         | 12.7933         | 9.76106          | 9.79228          |
| 17.033           | 30              | 30              | 30              | 30              | 10.0261          | 9.9705           |
| 14.4005          | 30              | 30              | 30              | 21.1991         | 9.65642          | 9.60329          |
| 15.3947          | 30              | 30              | 30              | 30              | 9.31754          | 9.2316           |
| 14.4047          | 30              | 30              | 30              | 30              | 9.31509          | 9.33775          |
| 16.1079          | 30              | 30              | 30              | 30              | 9.73461          | 9.71494          |
| 13.7257          | 30              | 30              | 30              | 30              | 8.87027          | 8.9075           |
| 14.9566          | 30              | 30              | 30              | 15.0703         | 8.94993          | 9.00029          |
| 16.4162          | 30              | 30              | 30              | 30              | 9.87051          | 9.88477          |
| 12.5536          | 30              | 30              | 30              | 17.2099         | 9.31066          | 9.29054          |
| 14.6759          | 30              | 30              | 30              | 19.8127         | 9.55284          | 9.59034          |
| 16.0355          | 30              | 30              | 30              | 15.166          | 9.59486          | 9.67619          |
| 15.7939          | 30              | 30              | 30              | 30              | 9.65841          | 9.61822          |
| 14.4131          | 30              | 30              | 30              | 15.4388         | 9.4412           | 9.45292          |
| 15.2317          | 30              | 30              | 30              | 22.4589         | 10.2024          | 10.1629          |
| 15.1439          | 30              | 30              | 30              | 30              | 9.08965          | 9.15493          |
| 15.4865          | 30              | 24.3256         | 30              | 30              | 10.0439          | 10.0335          |
| 14.7456          | 30              | 30              | 30              | 30              | 8.78758          | 8.80741          |
| 12.1716          | 30              | 30              | 30              | 15.544          | 7.25135          | 7.18784          |
| 14.535           | 30              | 30              | 30              | 17.8909         | 8.99226          | 9.0092           |

|         |         |    |         |         |         |         |
|---------|---------|----|---------|---------|---------|---------|
| 15.7352 | 30      | 30 | 30      | 16.3468 | 9.59448 | 9.60636 |
| 17.0339 | 30      | 30 | 30      | 30      | 10.1394 | 10.2425 |
| 14.3898 | 30      | 30 | 30      | 30      | 9.67747 | 9.56589 |
| 17.0072 | 30      | 30 | 30      | 30      | 9.13526 | 9.12761 |
| 16.1473 | 30      | 30 | 30      | 30      | 9.50238 | 9.50873 |
| 19.4039 | 30      | 30 | 30      | 30      | 8.49816 | 8.52816 |
| 14.8283 | 30      | 30 | 30      | 19.3262 | 9.64827 | 9.61272 |
| 16.8855 | 30      | 30 | 17.2997 | 13.4649 | 9.09551 | 9.08155 |
| 16.8575 | 30      | 30 | 30      | 16.0529 | 9.59838 | 9.67941 |
| 14.836  | 30      | 30 | 30      | 30      | 9.86837 | 10.0161 |
| 15.4823 | 30      | 30 | 30      | 30      | 9.44594 | 9.51121 |
| 30      | 30      | 30 | 30      | 15.0672 | 9.44457 | 9.51074 |
| 15.4807 | 30      | 30 | 30      | 15.6424 | 10.3852 | 10.4777 |
| 17.216  | 30      | 30 | 30      | 16.6812 | 9.25382 | 9.4616  |
| 30      | 30      | 30 | 30      | 22.1994 | 11.9965 | 12.2103 |
| 30      | 30      | 30 | 30      | 19.432  | 10.6198 | 10.7847 |
| 16.2544 | 30      | 30 | 30      | 30      | 10.4452 | 10.6447 |
| 15.209  | 30      | 30 | 30      | 30      | 8.50931 | 8.75082 |
| 15.1302 | 30      | 30 | 30      | 20.8786 | 9.96187 | 10.1598 |
| 15.4525 | 30      | 30 | 30      | 20.8978 | 9.75114 | 9.86243 |
| 14.6531 | 30      | 30 | 30      | 30      | 9.53288 | 9.73149 |
| 14.6722 | 30      | 30 | 30      | 30      | 9.52842 | 9.54023 |
| 15.6139 | 30      | 30 | 30      | 30      | 10.2202 | 10.345  |
| 16.4312 | 30      | 30 | 30      | 30      | 9.30451 | 9.52613 |
| 15.3978 | 30      | 30 | 30      | 19.4992 | 9.56435 | 9.78721 |
| 16.9645 | 30      | 30 | 30      | 30      | 9.64566 | 9.90451 |
| 15.9822 | 30      | 30 | 30      | 30      | 10.3389 | 10.4351 |
| 14.0243 | 30      | 30 | 30      | 30      | 8.4046  | 8.54475 |
| 15.3122 | 30      | 30 | 30      | 17.8616 | 10.4324 | 10.6329 |
| 15.3783 | 30      | 30 | 30      | 22.9715 | 9.74055 | 9.86769 |
| 15.7539 | 30      | 30 | 30      | 30      | 10.2956 | 10.4485 |
| 15.5327 | 30      | 30 | 30      | 30      | 10.3893 | 10.5906 |
| 15.1772 | 23.0021 | 30 | 30      | 30      | 10.0953 | 10.2726 |
| 16.7841 | 30      | 30 | 30      | 16.2992 | 9.68653 | 9.72964 |
| 15.7249 | 30      | 30 | 30      | 30      | 10.1662 | 10.1721 |
| 14.871  | 30      | 30 | 30      | 30      | 9.62623 | 9.70787 |
| 15.2987 | 30      | 30 | 30      | 16.1171 | 10.3993 | 10.5447 |
| 15.0299 | 24.2311 | 30 | 30      | 18.3778 | 9.3773  | 9.49833 |
| 17.081  | 30      | 30 | 30      | 30      | 9.68435 | 9.80321 |
| 16.1947 | 30      | 30 | 30      | 30      | 9.97095 | 10.0377 |
| 16.3192 | 30      | 30 | 30      | 30      | 10.2134 | 10.3422 |

|         |    |    |    |         |         |         |
|---------|----|----|----|---------|---------|---------|
| 15.2043 | 30 | 30 | 30 | 30      | 9.56512 | 9.63955 |
| 16.2264 | 30 | 30 | 30 | 16.4714 | 10.2914 | 10.3413 |
| 17.0672 | 30 | 30 | 30 | 14.5979 | 11.3405 | 11.3719 |
| 13.4869 | 30 | 30 | 30 | 14.0893 | 7.9767  | 8.09523 |
| 15.2497 | 30 | 30 | 30 | 14.8215 | 9.3697  | 9.59014 |
| 14.9753 | 30 | 30 | 30 | 17.3321 | 9.70027 | 9.80693 |
| 15.2192 | 30 | 30 | 30 | 16.6551 | 9.00428 | 9.16958 |
| 14.0888 | 30 | 30 | 30 | 30      | 9.65302 | 9.74706 |
| 15.256  | 30 | 30 | 30 | 16.2649 | 9.06786 | 9.11591 |
| 15.6811 | 30 | 30 | 30 | 30      | 9.50654 | 9.60465 |
| 15.0043 | 30 | 30 | 30 | 17.3763 | 10.1337 | 10.1912 |
| 16.2453 | 30 | 30 | 30 | 30      | 10.927  | 11.0433 |
| 17.2468 | 30 | 30 | 30 | 21.6412 | 10.5047 | 10.5381 |
| 15.2318 | 30 | 30 | 30 | 17.2165 | 8.43952 | 8.45991 |

| <b>Gsk3b_A77</b> | <b>Gsk3b_A89</b> | <b>Gusb_A06</b> | <b>Gusb_A18</b> | <b>H6pd_A30</b> | <b>H6pd_A42</b> | <b>Hes1_A54</b> |
|------------------|------------------|-----------------|-----------------|-----------------|-----------------|-----------------|
| 14.279           | 12.983           | 30              | 30              | 30              | 17.0527         | 30              |
| 12.3357          | 11.3284          | 15.7644         | 13.3182         | 15.2467         | 30              | 11.5698         |
| 14.0833          | 13.1215          | 22.0989         | 30              | 30              | 21.2085         | 30              |
| 12.9043          | 13.3952          | 15.3562         | 13.5186         | 30              | 30              | 15.063          |
| 15.1742          | 15.2512          | 14.3694         | 15.4135         | 20.6812         | 13.7949         | 30              |
| 30               | 24.2093          | 15.0369         | 15.2809         | 30              | 20.8572         | 30              |
| 11.7909          | 14.5659          | 13.4033         | 11.6261         | 30              | 30              | 30              |
| 11.948           | 12.3703          | 14.7629         | 12.7334         | 15.6141         | 16.5357         | 13.6773         |
| 11.6413          | 11.4494          | 15.8785         | 19.064          | 16.7211         | 14.9963         | 30              |
| 13.6331          | 12.5151          | 15.8607         | 14.4392         | 30              | 14.9261         | 13.3779         |
| 12.863           | 13.2906          | 30              | 14.6026         | 30              | 21.5309         | 16.7449         |
| 12.1352          | 13.9588          | 30              | 16.2006         | 30              | 20.3369         | 14.2801         |
| 12.374           | 14.2364          | 15.8868         | 12.8518         | 30              | 30              | 13.7581         |
| 11.7602          | 11.5225          | 14.4788         | 15.3129         | 18.7722         | 15.0208         | 14.9602         |
| 13.6445          | 14.537           | 14.6761         | 14.1969         | 16.5893         | 30              | 21.5737         |
| 13.2438          | 12.6543          | 30              | 30              | 30              | 30              | 15.4938         |
| 13.5784          | 12.314           | 14.7312         | 12.7891         | 16.5008         | 20.0286         | 17.5046         |
| 12.3192          | 11.8414          | 13.3621         | 15.1337         | 19.9902         | 16.0678         | 30              |
| 11.0443          | 11.5346          | 13.4281         | 12.6286         | 15.2271         | 14.2224         | 13.0633         |
| 11.8109          | 12.2826          | 14.7906         | 13.6843         | 30              | 21.4998         | 16.0697         |
| 12.9385          | 12.799           | 30              | 30              | 30              | 22.4722         | 14.7905         |
| 14.2759          | 13.6713          | 30              | 30              | 16.333          | 15.53           | 15.546          |
| 12.6049          | 12.3075          | 30              | 13.959          | 30              | 22.1332         | 13.5275         |
| 11.9776          | 14.3464          | 15.4865         | 13.8089         | 17.4804         | 15.393          | 30              |
| 13.1808          | 12.9384          | 14.9363         | 15.2503         | 30              | 30              | 14.193          |
| 12.6495          | 14.2111          | 15.8096         | 30              | 30              | 24.0571         | 12.584          |
| 12.8804          | 13.2935          | 30              | 14.4283         | 30              | 19.0015         | 15.7052         |
| 30               | 12.2467          | 30              | 15.4207         | 30              | 30              | 13.7157         |
| 13.1475          | 11.6918          | 15.9263         | 15.3901         | 16.7025         | 28.5789         | 14.0477         |
| 12.8025          | 13.2581          | 15.8869         | 13.2391         | 17.5136         | 17.3671         | 16.9053         |
| 14.5362          | 13.6261          | 14.1424         | 12.6631         | 30              | 15.9053         | 30              |
| 12.9818          | 13.2934          | 13.3625         | 13.8707         | 30              | 30              | 15.6005         |
| 14.1781          | 15.1775          | 14.8572         | 12.5083         | 15.9334         | 14.7733         | 30              |
| 12.486           | 11.8116          | 15.3237         | 14.3008         | 30              | 18.0591         | 14.1501         |
| 12.7934          | 12.5308          | 16.0313         | 30              | 30              | 18.0801         | 16.1901         |
| 12.4875          | 12.0163          | 13.8168         | 13.7252         | 30              | 21.1682         | 14.8338         |
| 14.1547          | 14.4385          | 25.4172         | 30              | 30              | 16.6104         | 16.2779         |
| 12.935           | 15.318           | 15.7716         | 13.1916         | 17.521          | 16.5138         | 15.1581         |
| 10.7648          | 10.7265          | 13.6646         | 11.4582         | 16.9939         | 18.2699         | 11.9237         |
| 12.638           | 12.3024          | 14.881          | 13.1296         | 30              | 21.8643         | 13.1197         |



|         |         |         |         |         |         |         |
|---------|---------|---------|---------|---------|---------|---------|
| 12.8587 | 14.1612 | 15.7587 | 14.9957 | 30      | 24.1556 | 12.727  |
| 30      | 13.0652 | 30      | 30      | 23.3636 | 14.346  | 14.5645 |
| 12.8908 | 12.302  | 30      | 13.0421 | 30      | 19.6176 | 30      |
| 13.1965 | 12.2636 | 13.8438 | 13.2181 | 18.3996 | 16.6782 | 15.9901 |
| 14.3546 | 12.714  | 30      | 14.4068 | 30      | 30      | 30      |
| 11.7528 | 11.2136 | 13.6465 | 13.645  | 30      | 23.9957 | 14.8624 |
| 12.3481 | 12.5874 | 13.1122 | 13.636  | 21.027  | 16.4318 | 14.4596 |
| 12.3701 | 12.229  | 16.101  | 13.6277 | 15.9521 | 19.3039 | 12.92   |
| 15.2836 | 13.7552 | 30      | 13.928  | 30      | 20.7225 | 15.3303 |
| 12.9572 | 12.9417 | 14.0432 | 12.9106 | 30      | 16.4789 | 30      |
| 12.9636 | 13.1254 | 30      | 18.3203 | 30      | 15.8166 | 14.8474 |
| 13.4041 | 13.4045 | 30      | 15.9269 | 30      | 22.4278 | 30      |
| 30      | 13.7809 | 30      | 12.6388 | 16.5402 | 21.7724 | 30      |
| 14.1326 | 13.4609 | 13.6429 | 12.49   | 15.6326 | 18.4009 | 16.6107 |
| 30      | 30      | 30      | 30      | 30      | 23.8894 | 30      |
| 15.4943 | 12.7468 | 15.651  | 13.9707 | 16.9931 | 24.0575 | 30      |
| 15.4022 | 14.5086 | 13.6356 | 14.2792 | 16.7842 | 30      | 30      |
| 12.6774 | 13.8187 | 14.1861 | 15.0291 | 30      | 16.6827 | 14.4089 |
| 12.6825 | 13.1205 | 14.5678 | 30      | 30      | 17.2442 | 30      |
| 12.6294 | 15.2887 | 30      | 30      | 15.1067 | 16.4163 | 17.2696 |
| 14.4309 | 13.7617 | 30      | 13.4256 | 15.369  | 19.7547 | 30      |
| 13.1883 | 12.7913 | 30      | 30      | 30      | 12.0435 | 30      |
| 13.8441 | 12.8981 | 15.7574 | 12.8184 | 30      | 13.9349 | 30      |
| 11.8711 | 12.6103 | 14.6757 | 13.4555 | 30      | 24.0612 | 16.0739 |
| 13.0959 | 12.679  | 15.3431 | 13.5124 | 30      | 19.5344 | 15.6869 |
| 13.3324 | 13.4919 | 30      | 13.4478 | 15.8261 | 16.1879 | 14.2997 |
| 14.3082 | 15.8034 | 30      | 15.0712 | 30      | 23.4665 | 16.2577 |
| 12.2835 | 12.1087 | 13.104  | 13.0025 | 17.0074 | 23.1819 | 12.6341 |
| 30      | 30      | 14.0406 | 15.1739 | 30      | 30      | 30      |
| 14.4045 | 13.5287 | 30      | 22.0743 | 30      | 18.1224 | 17.0657 |
| 12.4492 | 12.0321 | 14.7746 | 30      | 30      | 22.1573 | 15.1322 |
| 30      | 14.2593 | 30      | 15.2238 | 30      | 15.3802 | 30      |
| 13.0211 | 12.7585 | 13.153  | 13.5504 | 17.5129 | 14.7124 | 15.4964 |
| 12.3334 | 13.0133 | 13.9983 | 14.1467 | 30      | 21.3415 | 30      |
| 13.4973 | 13.1302 | 30      | 15.082  | 30      | 22.033  | 30      |
| 15.2766 | 13.3372 | 14.1119 | 13.6523 | 18.0374 | 30      | 30      |
| 13.7924 | 13.7545 | 30      | 16.1412 | 16.4963 | 20.2917 | 13.3691 |
| 12.5754 | 12.3589 | 15.4177 | 13.1641 | 18.3637 | 16.3334 | 30      |
| 13.2552 | 12.5938 | 13.8258 | 15.1653 | 14.8146 | 15.3992 | 16.2729 |
| 13.8201 | 14.4149 | 15.4617 | 13.7819 | 17.3646 | 14.1288 | 13.8112 |
| 14.3132 | 12.6667 | 16.0091 | 16.7604 | 30      | 19.8183 | 30      |

|         |         |         |         |         |         |         |
|---------|---------|---------|---------|---------|---------|---------|
| 30      | 14.4799 | 15.7438 | 15.0998 | 30      | 24.2744 | 20.023  |
| 14.4081 | 15.4902 | 30      | 16.1625 | 16.7449 | 30      | 30      |
| 14.358  | 15.3774 | 15.7689 | 22.1742 | 16.7549 | 22.1967 | 25.2326 |
| 11.1252 | 10.5563 | 30      | 30      | 14.9318 | 14.2459 | 11.8898 |
| 15.2611 | 14.517  | 15.7758 | 12.9297 | 30      | 21.797  | 14.2695 |
| 12.4    | 13.1221 | 13.5626 | 12.2363 | 16.9034 | 14.2276 | 30      |
| 30      | 13.9626 | 15.7623 | 14.8393 | 14.8014 | 14.6352 | 15.238  |
| 12.8941 | 14.3173 | 15.6693 | 13.7379 | 16.9905 | 13.4102 | 18.8784 |
| 12.0266 | 11.553  | 15.8761 | 20.8984 | 16.2564 | 15.4185 | 16.5651 |
| 13.4717 | 13.3322 | 15.7913 | 13.0754 | 15.1582 | 13.8652 | 16.5285 |
| 13.1949 | 13.0465 | 15.853  | 13.7811 | 16.765  | 30      | 13.6856 |
| 13.2689 | 13.6051 | 15.8956 | 13.6242 | 30      | 22.9672 | 17.0127 |
| 30      | 15.6631 | 14.1799 | 19.1618 | 30      | 24.2359 | 15.4847 |
| 13.4383 | 14.3898 | 15.7612 | 12.9873 | 17.1441 | 16.0355 | 14.7095 |

| Hes1_A66 | Hes5_A78 | Hes5_A90 | Hif1a_A07 | Hif1a_A19 | Hopx_A31 | Hopx_A43 |
|----------|----------|----------|-----------|-----------|----------|----------|
| 23.6169  | 30       | 30       | 15.2551   | 15.1766   | 26.4119  | 30       |
| 9.6686   | 18.0208  | 22.4324  | 12.6571   | 14.0707   | 11.4004  | 11.4193  |
| 30       | 30       | 30       | 30        | 15.1708   | 30       | 30       |
| 12.5528  | 19.3862  | 30       | 12.9946   | 12.8193   | 11.9421  | 11.9349  |
| 30       | 30       | 30       | 13.4673   | 14.8548   | 13.0987  | 13.1714  |
| 30       | 30       | 30       | 15.3573   | 30        | 26.1726  | 30       |
| 21.1087  | 30       | 30       | 12.6073   | 12.2445   | 11.2656  | 11.2206  |
| 14.1484  | 30       | 30       | 13.0239   | 14.6842   | 11.5536  | 11.4815  |
| 30       | 30       | 30       | 12.6836   | 12.0942   | 13.8436  | 13.7233  |
| 11.2114  | 30       | 30       | 14.5536   | 13.5252   | 12.3899  | 12.3221  |
| 15.9369  | 30       | 30       | 13.2325   | 12.1066   | 12.7385  | 12.6727  |
| 14.177   | 30       | 30       | 12.8657   | 12.5745   | 11.8472  | 11.7599  |
| 30       | 30       | 30       | 14.0849   | 13.5178   | 11.433   | 11.4247  |
| 13.1894  | 19.145   | 30       | 14.0271   | 21.7208   | 12.4829  | 12.5259  |
| 14.9061  | 30       | 30       | 30        | 13.0687   | 12.6266  | 12.6981  |
| 13.8633  | 30       | 30       | 12.7835   | 11.8979   | 12.2859  | 12.3552  |
| 14.5749  | 30       | 30       | 12.8663   | 14.4325   | 11.7222  | 11.6921  |
| 30       | 19.731   | 19.3001  | 13.2397   | 12.2784   | 10.6919  | 10.6167  |
| 11.2322  | 30       | 30       | 11.4977   | 11.5805   | 10.7562  | 10.747   |
| 15.1654  | 30       | 30       | 30        | 30        | 12.5859  | 12.5253  |
| 14.1162  | 21.5815  | 30       | 13.6882   | 12.5035   | 11.8684  | 11.8619  |
| 13.9485  | 30       | 30       | 13.2929   | 13.8794   | 13.2988  | 13.2031  |
| 12.5627  | 30       | 30       | 15.329    | 30        | 11.926   | 11.9068  |
| 30       | 30       | 30       | 13.8347   | 12.9272   | 11.8787  | 11.9192  |
| 13.8757  | 21.7629  | 24.822   | 14.1604   | 13.339    | 11.6677  | 11.5876  |
| 13.6356  | 30       | 30       | 12.0388   | 11.3531   | 11.8643  | 11.8224  |
| 13.7879  | 18.3615  | 30       | 12.0371   | 11.5      | 12.225   | 12.2186  |
| 13.8867  | 30       | 30       | 15.1852   | 15.0922   | 12.132   | 12.0517  |
| 11.8345  | 30       | 30       | 14.2719   | 13.924    | 13.0616  | 13.0086  |
| 15.2406  | 30       | 30       | 13.1606   | 13.6561   | 12.457   | 12.504   |
| 24.7527  | 21.7379  | 21.1651  | 15.1215   | 14.7761   | 11.6244  | 11.593   |
| 12.9339  | 30       | 30       | 12.2221   | 13.0536   | 11.8949  | 11.8181  |
| 30       | 30       | 30       | 12.6953   | 14.0049   | 11.8748  | 11.7419  |
| 12.6646  | 30       | 20.9373  | 12.8099   | 11.6766   | 11.8025  | 11.7543  |
| 17.8634  | 30       | 30       | 14.4776   | 12.3494   | 13.4578  | 13.341   |
| 12.5011  | 30       | 30       | 30        | 30        | 12.9908  | 13.0503  |
| 30       | 30       | 30       | 13.8193   | 14.1133   | 12.4358  | 12.3478  |
| 12.7416  | 30       | 30       | 13.2053   | 12.4553   | 11.9002  | 11.7278  |
| 9.75843  | 30       | 30       | 12.458    | 12.7803   | 10.7893  | 10.6864  |
| 12.6204  | 19.8342  | 23.8304  | 13.7203   | 14.1383   | 12.294   | 12.2195  |

|         |         |         |         |         |         |         |
|---------|---------|---------|---------|---------|---------|---------|
| 11.0255 | 19.4285 | 19.2098 | 12.2394 | 12.3115 | 11.9128 | 11.8483 |
| 12.7418 | 30      | 30      | 14.3373 | 12.8221 | 12.0578 | 11.9904 |
| 30      | 19.2345 | 19.7771 | 12.9333 | 12.5825 | 12.4031 | 12.243  |
| 15.7033 | 30      | 30      | 15.8743 | 13.3593 | 12.0874 | 12.0164 |
| 30      | 30      | 30      | 30      | 30      | 12.4817 | 12.4462 |
| 12.1643 | 30      | 30      | 12.7538 | 10.9972 | 11.7396 | 11.6902 |
| 12.8943 | 30      | 30      | 13.3113 | 13.8966 | 12.0551 | 12.0468 |
| 11.7828 | 30      | 30      | 14.4234 | 13.8736 | 11.9706 | 11.8887 |
| 13.1629 | 23.6991 | 17.8    | 30      | 14.469  | 11.4713 | 11.3683 |
| 30      | 30      | 30      | 30      | 14.7435 | 11.6161 | 11.6689 |
| 14.0724 | 30      | 30      | 14.9196 | 13.7881 | 11.7628 | 11.7744 |
| 30      | 30      | 30      | 15.1207 | 13.7247 | 13.8456 | 13.7677 |
| 30      | 30      | 30      | 14.4347 | 14.7975 | 12.637  | 12.6267 |
| 14.9927 | 20.1042 | 30      | 30      | 13.3476 | 11.6647 | 11.7069 |
| 30      | 30      | 30      | 30      | 30      | 23.1151 | 23.2266 |
| 23.9983 | 18.9228 | 21.5169 | 30      | 30      | 13.8316 | 13.7824 |
| 30      | 30      | 30      | 15.0323 | 14.7146 | 11.745  | 11.8191 |
| 17.4495 | 30      | 30      | 30      | 17.4846 | 11.3782 | 11.4405 |
| 27.9039 | 30      | 30      | 15.3954 | 12.3428 | 11.0571 | 11.1521 |
| 15.4086 | 30      | 30      | 15.1934 | 13.7219 | 11.8838 | 12.0032 |
| 30      | 30      | 30      | 12.5726 | 12.4207 | 11.978  | 12.027  |
| 30      | 30      | 19.5408 | 12.8911 | 13.7829 | 12.55   | 12.5462 |
| 30      | 30      | 30      | 12.6472 | 13.1591 | 11.6305 | 11.6405 |
| 15.1601 | 30      | 24.4946 | 12.5936 | 14.945  | 11.6952 | 11.7024 |
| 13.9438 | 30      | 30      | 14.0006 | 24.0652 | 10.8513 | 10.9103 |
| 13.5232 | 22.0072 | 18.9269 | 15.1447 | 12.4983 | 11.8586 | 11.8959 |
| 30      | 30      | 30      | 15.0644 | 30      | 12.4916 | 12.6294 |
| 11.7064 | 30      | 30      | 13.6159 | 12.6929 | 10.5262 | 10.6016 |
| 30      | 30      | 30      | 13.4416 | 13.6054 | 12.4644 | 12.4819 |
| 30      | 30      | 19.5489 | 15.1483 | 30      | 12.1601 | 12.3297 |
| 13.0001 | 30      | 30      | 14.0726 | 13.0706 | 11.8651 | 11.9025 |
| 30      | 30      | 30      | 14.0494 | 14.6388 | 11.8346 | 11.9147 |
| 14.5424 | 19.4336 | 22.7425 | 12.613  | 13.1279 | 12.4514 | 12.5396 |
| 30      | 30      | 30      | 12.7347 | 13.1182 | 11.6155 | 11.6456 |
| 30      | 30      | 30      | 30      | 13.0019 | 12.1266 | 12.2448 |
| 30      | 30      | 30      | 12.7598 | 12.6074 | 11.9114 | 12.0093 |
| 13.5838 | 30      | 30      | 15.135  | 13.0376 | 12.1714 | 12.273  |
| 30      | 30      | 30      | 13.5665 | 12.7293 | 12.3126 | 12.4012 |
| 13.7861 | 30      | 30      | 30      | 30      | 11.4575 | 11.5391 |
| 13.2284 | 21.3008 | 30      | 30      | 13.0256 | 12.8348 | 12.9547 |
| 23.5849 | 30      | 30      | 12.5343 | 12.7445 | 11.9923 | 12.0632 |

|         |         |         |         |         |         |         |
|---------|---------|---------|---------|---------|---------|---------|
| 16.2134 | 30      | 18.4444 | 30      | 30      | 11.967  | 12.0311 |
| 24.826  | 18.7686 | 20.8482 | 14.1643 | 30      | 12.6781 | 12.6231 |
| 22.9548 | 30      | 30      | 30      | 30      | 12.7923 | 12.8578 |
| 10.1437 | 23.9357 | 30      | 12.5439 | 11.3245 | 10.9772 | 11.0539 |
| 13.8927 | 30      | 30      | 30      | 12.2806 | 11.8642 | 11.894  |
| 30      | 30      | 30      | 13.461  | 13.5889 | 11.4139 | 11.5096 |
| 13.2303 | 30      | 30      | 15.5072 | 13.6484 | 11.7844 | 11.7728 |
| 14.1794 | 30      | 30      | 15.2004 | 30      | 11.421  | 11.4168 |
| 13.8846 | 30      | 30      | 12.3002 | 11.9703 | 11.9762 | 12.0781 |
| 14.6251 | 30      | 19.0568 | 14.3828 | 12.0043 | 11.7804 | 11.841  |
| 11.7266 | 30      | 30      | 13.2286 | 12.6581 | 12.4535 | 12.6589 |
| 16.2718 | 30      | 30      | 12.503  | 30      | 12.7934 | 12.8073 |
| 13.7456 | 30      | 30      | 30      | 30      | 12.759  | 12.7859 |
| 18.6745 | 18.2274 | 17.3279 | 12.2836 | 13.3472 | 14.6936 | 14.5998 |

| <b>Jag1_A55</b> | <b>Jag1_A67</b> | <b>Lgr5_A79</b> | <b>Lgr5_A91</b> | <b>Lrig1_A08</b> | <b>Lrig1_A20</b> | <b>Lyz2_A32</b> |
|-----------------|-----------------|-----------------|-----------------|------------------|------------------|-----------------|
| 23.9408         | 30              | 30              | 30              | 30               | 24.4701          | 16.2109         |
| 15.2031         | 13.8811         | 11.078          | 10.3263         | 10.6844          | 10.173           | 9.9758          |
| 18.0932         | 30              | 23.5467         | 30              | 30               | 30               | 16.399          |
| 21.7881         | 30              | 30              | 30              | 12.2621          | 14.4153          | 9.92455         |
| 23.5298         | 30              | 15.0352         | 30              | 12.2315          | 13.7937          | 9.45704         |
| 18.7577         | 30              | 30              | 30              | 30               | 22.2764          | 17.4501         |
| 21.9579         | 30              | 23.2403         | 30              | 12.2309          | 12.7383          | 18.8757         |
| 24.8896         | 30              | 13.6953         | 11.8506         | 11.6869          | 12.4527          | 9.17182         |
| 20.1617         | 16.3599         | 13.4478         | 12.6642         | 12.8429          | 14.1633          | 12.8326         |
| 21.3093         | 30              | 30              | 30              | 12.2587          | 13.0323          | 9.29293         |
| 20.5599         | 26.2846         | 13.5642         | 30              | 30               | 14.8891          | 10.4349         |
| 15.4553         | 15.3675         | 30              | 22.3601         | 12.9826          | 13.116           | 15.8633         |
| 26.2593         | 30              | 30              | 30              | 15.2519          | 13.3543          | 10.3781         |
| 17.6133         | 30              | 30              | 30              | 12.72            | 15.1549          | 9.54083         |
| 15.2801         | 14.2888         | 13.5286         | 13.1286         | 14.28            | 14.276           | 10.8314         |
| 14.8729         | 14.4035         | 30              | 15.8716         | 13.0297          | 12.4963          | 11.7281         |
| 21.7073         | 30              | 14.8396         | 14.4785         | 12.7467          | 12.777           | 9.33262         |
| 19.24           | 30              | 30              | 14.1638         | 11.0485          | 12.4034          | 8.59925         |
| 24.3013         | 15.2155         | 12.5203         | 12.3525         | 10.3727          | 10.7251          | 9.17183         |
| 16.8597         | 15.1561         | 16.0865         | 15.536          | 12.3095          | 10.9182          | 11.1949         |
| 22.1593         | 30              | 30              | 30              | 12.2316          | 13.7547          | 9.42224         |
| 16.7851         | 30              | 14.2194         | 13.8432         | 12.4817          | 13.3228          | 12.5401         |
| 17.7684         | 19.4005         | 30              | 30              | 13.1268          | 13.402           | 9.49104         |
| 15.7168         | 15.2661         | 13.923          | 30              | 12.828           | 15.3388          | 9.72738         |
| 21.3807         | 15.8784         | 14.5962         | 13.4822         | 13.7421          | 15.224           | 10.0209         |
| 22.7893         | 30              | 30              | 30              | 12.5071          | 12.9789          | 12.9011         |
| 22.5781         | 23.6756         | 24.264          | 23.4594         | 12.9826          | 15.2795          | 10.765          |
| 21.3122         | 14.3784         | 30              | 30              | 13.9161          | 13.7023          | 12.8129         |
| 14.9587         | 15.2012         | 30              | 14.3573         | 12.9012          | 14.3918          | 16.0586         |
| 18.8408         | 30              | 13.4531         | 14.3847         | 11.774           | 12.9562          | 9.772           |
| 21.404          | 30              | 30              | 30              | 12.3446          | 19.296           | 9.24208         |
| 18.3031         | 30              | 12.9219         | 11.9792         | 12.6779          | 11.6831          | 9.783           |
| 23.5473         | 30              | 30              | 15.4284         | 12.9409          | 15.2078          | 11.1003         |
| 21.6719         | 15.3679         | 14.9412         | 30              | 13.2849          | 13.6676          | 10.0279         |
| 18.5469         | 15.2153         | 13.5061         | 12.7967         | 14.0092          | 12.8403          | 10.1045         |
| 20.9794         | 22.6477         | 15.1026         | 14.7365         | 13.3048          | 13.8526          | 8.82744         |
| 18.6419         | 15.5766         | 30              | 30              | 12.0426          | 15.4011          | 10.2581         |
| 19.9038         | 14.2678         | 14.4668         | 14.2831         | 12.3775          | 9.4173           | 10.6139         |
| 16.1794         | 13.2678         | 10.8646         | 11.3259         | 10.2474          | 11.1629          | 10.7956         |
| 20.2248         | 22.8053         | 21.1828         | 13.9854         | 12.0468          | 12.6155          | 9.09913         |

|         |         |         |         |         |         |         |
|---------|---------|---------|---------|---------|---------|---------|
| 19.3092 | 15.1118 | 13.4407 | 30      | 12.9698 | 12.491  | 9.84582 |
| 20.4627 | 30      | 30      | 30      | 13.3316 | 14.0055 | 9.59543 |
| 16.8402 | 30      | 13.8065 | 14.2652 | 12.7771 | 15.1376 | 8.77469 |
| 23.4459 | 30      | 18.8138 | 15.6392 | 12.365  | 12.3152 | 11.2503 |
| 17.6975 | 30      | 30      | 30      | 13.3345 | 13.7816 | 9.76519 |
| 17.4498 | 30      | 15.4715 | 13.2391 | 12.0816 | 12.5196 | 9.42024 |
| 19.6615 | 30      | 24.4858 | 15.4077 | 12.6656 | 14.5736 | 9.1909  |
| 17.3609 | 30      | 12.9351 | 15.293  | 12.299  | 13.812  | 13.45   |
| 20.7521 | 14.2576 | 30      | 30      | 30      | 12.9186 | 9.61062 |
| 16.6531 | 15.4669 | 30      | 30      | 13.4818 | 14.968  | 11.5071 |
| 20.6825 | 30      | 15.3537 | 30      | 12.4993 | 13.1139 | 10.2426 |
| 19.5953 | 30      | 30      | 30      | 30      | 30      | 17.1473 |
| 15.7785 | 23.7645 | 30      | 30      | 30      | 14.9098 | 11.6175 |
| 30      | 19.3959 | 30      | 30      | 12.9118 | 11.9629 | 10.0314 |
| 24.7611 | 30      | 30      | 30      | 30      | 24.7244 | 16.7512 |
| 19.6854 | 15.4073 | 30      | 30      | 14.0648 | 15.0237 | 11.8767 |
| 16.6861 | 30      | 24.5087 | 15.6017 | 13.8813 | 16.0307 | 11.3175 |
| 17.6978 | 15.4652 | 30      | 30      | 13.9321 | 22.6549 | 9.52962 |
| 20.4653 | 30      | 30      | 30      | 12.5523 | 15.3916 | 13.2861 |
| 16.9018 | 21.0098 | 13.6555 | 14.369  | 11.8598 | 12.2559 | 12.1666 |
| 19.8404 | 30      | 30      | 15.7701 | 12.8944 | 14.8782 | 10.6922 |
| 22.9277 | 30      | 14.9698 | 24.3791 | 12.1702 | 12.9291 | 13.6687 |
| 16.5094 | 30      | 13.7103 | 14.6476 | 13.1878 | 12.9286 | 10.3825 |
| 19.4267 | 13.5215 | 14.3439 | 14.5682 | 12.7065 | 13.1714 | 13.2272 |
| 20.6267 | 30      | 17.5165 | 13.9064 | 13.1685 | 13.4699 | 10.294  |
| 23.0676 | 30      | 30      | 30      | 12.1311 | 12.169  | 10.4951 |
| 30      | 30      | 30      | 16.5442 | 14.562  | 13.0933 | 11.6406 |
| 16.0364 | 30      | 12.113  | 10.8323 | 14.0668 | 10.9379 | 11.4201 |
| 20.7073 | 23.5473 | 30      | 30      | 15.1837 | 13.9991 | 11.942  |
| 20.4193 | 24.0189 | 15.3695 | 30      | 13.8441 | 13.3522 | 9.92206 |
| 22.6617 | 30      | 16.1838 | 14.6107 | 12.1698 | 13.7845 | 10.7552 |
| 16.0252 | 15.4793 | 30      | 30      | 14.812  | 12.2019 | 11.5196 |
| 20.6271 | 30      | 30      | 30      | 13.061  | 13.4635 | 9.52695 |
| 15.7982 | 30      | 30      | 30      | 14.8182 | 14.1588 | 9.96882 |
| 17.5834 | 30      | 16.0963 | 14.4008 | 30      | 14.3893 | 13.5199 |
| 23.3343 | 30      | 30      | 30      | 14.9999 | 14.6823 | 11.7601 |
| 30      | 30      | 22.8785 | 30      | 13.7369 | 15.074  | 13.7073 |
| 17.7189 | 14.7687 | 12.6374 | 13.0379 | 11.2393 | 11.7382 | 10.0973 |
| 20.6385 | 30      | 15.9508 | 13.9232 | 13.8286 | 12.3664 | 9.81541 |
| 16.7121 | 13.808  | 30      | 30      | 12.2959 | 14.0442 | 7.81882 |
| 17.2154 | 13.4993 | 30      | 30      | 12.0883 | 12.7117 | 10.7054 |

|         |         |         |         |         |         |         |
|---------|---------|---------|---------|---------|---------|---------|
| 15.4865 | 12.8739 | 30      | 30      | 13.48   | 9.96617 | 10.3204 |
| 15.2023 | 30      | 30      | 30      | 14.8625 | 12.8961 | 13.7926 |
| 21.1885 | 30      | 30      | 30      | 13.4655 | 15.1411 | 14.6797 |
| 20.396  | 14.4245 | 12.7407 | 14.1714 | 10.7123 | 11.3219 | 12.1308 |
| 15.156  | 30      | 30      | 13.7644 | 12.5506 | 12.8691 | 11.9425 |
| 21.8129 | 30      | 15.5522 | 15.675  | 13.4364 | 12.5806 | 9.57934 |
| 17.7993 | 30      | 14.5365 | 14.8908 | 11.6668 | 12.2923 | 11.9558 |
| 16.3728 | 30      | 17.6506 | 14.4686 | 11.4159 | 12.3046 | 9.75341 |
| 21.5353 | 30      | 14.8446 | 14.3755 | 11.7102 | 13.6836 | 12.716  |
| 15.886  | 30      | 30      | 30      | 14.1805 | 11.5112 | 12.2388 |
| 21.0035 | 15.58   | 13.2934 | 15.2026 | 12.9232 | 12.9079 | 11.6325 |
| 23.1656 | 30      | 13.7752 | 30      | 13.2944 | 14.4503 | 13.0017 |
| 21.4932 | 30      | 15.4712 | 15.7274 | 18.8533 | 15.1601 | 12.0095 |
| 23.3402 | 30      | 30      | 30      | 30      | 22.446  | 12.264  |



| <b>Lyz2_A44</b> | <b>Msi1_A56</b> | <b>Msi1_A68</b> | <b>Msi2_A80</b> | <b>Msi2_A92</b> | <b>Myb_A09</b> | <b>Myb_A21</b> |
|-----------------|-----------------|-----------------|-----------------|-----------------|----------------|----------------|
| 17.887          | 30              | 30              | 30              | 30              | 30             | 30             |
| 9.74017         | 10.0634         | 13.1323         | 11.8705         | 13.4205         | 10.948         | 11.029         |
| 16.7292         | 30              | 25.2351         | 30              | 30              | 30             | 30             |
| 9.89794         | 14.5166         | 15.0682         | 13.1727         | 17.8129         | 30             | 30             |
| 9.13655         | 12.8355         | 14.4325         | 13.1292         | 12.821          | 15.6754        | 15.5624        |
| 23.5931         | 30              | 30              | 30              | 30              | 30             | 30             |
| 16.344          | 12.431          | 13.9101         | 13.3662         | 14.6122         | 30             | 30             |
| 8.90573         | 13.3327         | 13.0084         | 13.2307         | 15.7885         | 30             | 30             |
| 12.1271         | 13.2741         | 13.5268         | 12.9005         | 14.2601         | 30             | 30             |
| 9.15769         | 11.4491         | 13.4312         | 13.338          | 16.3739         | 30             | 15.2223        |
| 10.0883         | 12.4918         | 14.4377         | 23.5002         | 13.2068         | 15.5471        | 14.4746        |
| 13.8715         | 13.024          | 14.3776         | 13.0989         | 16.2368         | 30             | 30             |
| 10.1093         | 14.1069         | 21.1541         | 13.2603         | 14.3804         | 30             | 15.3224        |
| 9.12855         | 14.658          | 16.0875         | 14.2741         | 14.5507         | 13.7966        | 14.072         |
| 10.2207         | 14.4117         | 14.8813         | 13.4228         | 13.4899         | 30             | 30             |
| 11.4845         | 13.5136         | 21.3899         | 30              | 14.2326         | 30             | 30             |
| 8.89244         | 12.255          | 14.6474         | 12.761          | 14.7155         | 30             | 30             |
| 8.26669         | 14.4442         | 13.7906         | 12.3918         | 13.0816         | 30             | 30             |
| 8.87391         | 10.8499         | 12.7594         | 11.6848         | 13.5236         | 9.68492        | 9.59696        |
| 10.5686         | 11.8397         | 11.9391         | 11.7522         | 16.0611         | 30             | 30             |
| 9.0213          | 16.8639         | 15.8605         | 12.5995         | 13.9032         | 30             | 30             |
| 11.9303         | 14.8465         | 23.7087         | 12.5992         | 14.5925         | 30             | 17.985         |
| 9.09648         | 13.0182         | 14.504          | 13.9502         | 14.9174         | 12.626         | 12.4354        |
| 9.35876         | 12.8423         | 13.8557         | 13.1213         | 17.912          | 13.2023        | 13.391         |
| 9.52756         | 12.8546         | 14.9702         | 13.2311         | 17.1689         | 30             | 30             |
| 12.1115         | 15.0053         | 13.2276         | 14.0448         | 15.776          | 30             | 30             |
| 9.96205         | 12.2061         | 15.9503         | 13.5154         | 13.3312         | 14.6392        | 30             |
| 12.8719         | 30              | 30              | 12.7919         | 14.9361         | 14.4957        | 16.5318        |
| 14.3317         | 13.0413         | 30              | 14.2193         | 16.0189         | 30             | 30             |
| 9.52281         | 13.7715         | 18.2096         | 12.964          | 13.6902         | 30             | 30             |
| 8.88828         | 15.0678         | 20.1885         | 30              | 23.8819         | 30             | 30             |
| 9.35572         | 13.8421         | 30              | 14.7295         | 14.2715         | 30             | 30             |
| 10.5708         | 12.4563         | 14.2467         | 15.143          | 15.458          | 30             | 30             |
| 9.94008         | 14.3083         | 15.6102         | 13.2471         | 12.95           | 15.361         | 15.5061        |
| 9.71886         | 14.3638         | 15.9167         | 15.2854         | 13.975          | 30             | 30             |
| 8.65978         | 15.2772         | 21.9598         | 13.7122         | 14.6064         | 30             | 30             |
| 9.84159         | 14.1367         | 14.8922         | 13.2134         | 15.1024         | 30             | 30             |
| 10.2142         | 13.037          | 16.7559         | 13.1087         | 13.5793         | 30             | 30             |
| 10.3538         | 9.97506         | 12.1802         | 12.0182         | 12.556          | 9.77679        | 10.1301        |
| 8.77497         | 10.928          | 14.1123         | 12.9134         | 13.9905         | 30             | 15.619         |

|         |         |         |         |         |         |         |
|---------|---------|---------|---------|---------|---------|---------|
| 9.74511 | 10.9701 | 13.0718 | 12.6551 | 14.0385 | 30      | 15.338  |
| 9.16235 | 12.0342 | 12.8603 | 14.0393 | 14.4733 | 30      | 30      |
| 8.31569 | 11.6761 | 13.4197 | 14.224  | 13.9365 | 30      | 30      |
| 10.6901 | 11.753  | 14.8357 | 14.4755 | 17.3841 | 16.9485 | 15.805  |
| 9.37839 | 11.8275 | 14.4145 | 12.0602 | 12.9101 | 30      | 23.0257 |
| 9.20092 | 11.7251 | 12.6039 | 11.7683 | 14.4378 | 13.6755 | 30      |
| 8.7812  | 12.5602 | 13.9519 | 13.9799 | 14.0472 | 15.7836 | 30      |
| 13.2224 | 12.5938 | 14.3131 | 12.6155 | 12.0315 | 30      | 30      |
| 9.2335  | 12.6189 | 30      | 12.7934 | 14.115  | 12.6191 | 30      |
| 11.0103 | 14.0421 | 15.1413 | 13.3771 | 14.6643 | 30      | 30      |
| 10.0962 | 12.533  | 15.1001 | 14.3056 | 14.0533 | 30      | 30      |
| 18.0122 | 30      | 30      | 15.4962 | 15.0427 | 30      | 22.3302 |
| 11.3337 | 11.9404 | 13.3625 | 30      | 30      | 13.5516 | 30      |
| 9.83912 | 12.7305 | 30      | 13.294  | 14.0658 | 30      | 30      |
| 15.7975 | 30      | 30      | 30      | 21.3033 | 30      | 30      |
| 11.7684 | 30      | 24.7804 | 14.6029 | 16.089  | 30      | 30      |
| 11.3553 | 12.8646 | 15.2963 | 30      | 14.5916 | 30      | 19.2552 |
| 9.30577 | 14.2037 | 30      | 14.2977 | 15.4535 | 14.2473 | 15.1188 |
| 13.1156 | 13.4009 | 14.3135 | 14.3675 | 14.6779 | 20.6615 | 30      |
| 11.7106 | 12.3242 | 15.3112 | 15.2951 | 30      | 30      | 15.0076 |
| 10.7758 | 13.175  | 14.2535 | 12.7923 | 13.464  | 30      | 30      |
| 12.4875 | 30      | 30      | 12.8297 | 14.0007 | 30      | 30      |
| 9.81751 | 12.5852 | 12.6867 | 11.8272 | 14.663  | 15.5661 | 15.1092 |
| 12.9727 | 13.0316 | 13.4542 | 12.2606 | 13.6477 | 30      | 15.386  |
| 9.79233 | 30      | 19.2247 | 13.7089 | 14.3794 | 30      | 30      |
| 10.2398 | 12.9464 | 14.97   | 30      | 18.5545 | 30      | 30      |
| 11.1921 | 12.4634 | 14.5493 | 15.3342 | 16.4157 | 30      | 30      |
| 10.8153 | 11.3222 | 13.349  | 13.8716 | 14.1439 | 11.6744 | 12.3147 |
| 12.1755 | 13.2331 | 14.6842 | 13.3805 | 13.9974 | 30      | 30      |
| 9.90499 | 13.948  | 15.4173 | 17.2154 | 14.7122 | 30      | 30      |
| 10.5293 | 14.113  | 15.9551 | 13.7086 | 13.4635 | 30      | 30      |
| 11.4149 | 13.7148 | 16.0768 | 30      | 15.3469 | 30      | 30      |
| 9.1329  | 13.0322 | 16.0237 | 12.8288 | 13.7756 | 30      | 30      |
| 9.49318 | 13.1937 | 13.6133 | 12.9283 | 15.2643 | 30      | 30      |
| 12.9444 | 12.6665 | 13.9156 | 13.1186 | 14.812  | 15.4121 | 12.9846 |
| 11.4154 | 16.7368 | 14.1379 | 14.4016 | 30      | 30      | 23.3067 |
| 13.3455 | 13.7223 | 17.2231 | 13.3311 | 14.7351 | 14.4156 | 14.1336 |
| 9.57119 | 12.9622 | 13.7437 | 12.3277 | 14.179  | 30      | 30      |
| 9.66542 | 11.989  | 13.8006 | 12.6093 | 12.9253 | 30      | 30      |
| 7.62393 | 15.194  | 23.6827 | 12.5009 | 14.8251 | 13.7129 | 15.1165 |
| 10.3813 | 13.6467 | 30      | 13.7729 | 15.1926 | 30      | 30      |

|         |         |         |         |         |         |         |
|---------|---------|---------|---------|---------|---------|---------|
| 10.1394 | 13.0019 | 14.9053 | 13.7931 | 13.0469 | 30      | 30      |
| 13.9435 | 13.0479 | 30      | 13.0896 | 16.9588 | 30      | 14.3252 |
| 13.4145 | 13.7561 | 15.9444 | 14.2813 | 30      | 30      | 30      |
| 11.8853 | 12.5411 | 14.0292 | 11.4713 | 13.1529 | 11.2263 | 11.0411 |
| 11.5445 | 12.6835 | 16.0195 | 12.5903 | 13.5985 | 30      | 22.2767 |
| 9.23422 | 12.5079 | 14.3381 | 13.7784 | 22.6948 | 30      | 30      |
| 11.1505 | 13.2293 | 16.0489 | 12.9369 | 12.7211 | 30      | 30      |
| 9.24962 | 12.7854 | 14.6591 | 14.4662 | 24.015  | 30      | 30      |
| 12.0033 | 12.2076 | 16.2725 | 14.6518 | 13.666  | 30      | 15.1863 |
| 11.7284 | 14.3603 | 20.7252 | 13.3782 | 15.9381 | 30      | 21.0781 |
| 11.437  | 14.3074 | 16.3899 | 12.7504 | 18.1645 | 15.1498 | 15.2488 |
| 12.7176 | 30      | 30      | 11.8239 | 14.5985 | 13.5203 | 20.2564 |
| 11.5833 | 12.0882 | 15.8233 | 13.3955 | 19.3141 | 30      | 30      |
| 11.8543 | 30      | 22.9161 | 30      | 30      | 30      | 30      |

| <b>Myc_A33</b> | <b>Myc_A45</b> | <b>Notch1_A57</b> | <b>Notch1_A69</b> | <b>Numb_A81</b> | <b>Numb_A93</b> | <b>Olfm4_A10</b> |
|----------------|----------------|-------------------|-------------------|-----------------|-----------------|------------------|
| 30             | 30             | 20.4993           | 30                | 30              | 30              | 30               |
| 10.1843        | 10.5765        | 12.8411           | 14.0271           | 13.369          | 12.8007         | 5.67405          |
| 14.3893        | 14.0329        | 13.0717           | 13.4992           | 30              | 30              | 22.7491          |
| 12.8735        | 13.537         | 19.9188           | 30                | 14.9432         | 14.7799         | 30               |
| 12.8027        | 15.3237        | 19.2864           | 30                | 30              | 30              | 30               |
| 11.1161        | 11.7486        | 19.8413           | 30                | 30              | 30              | 30               |
| 13.5062        | 13.9942        | 19.7251           | 30                | 13.9341         | 30              | 30               |
| 17.1787        | 30             | 20.8658           | 30                | 15.0396         | 11.9191         | 13.647           |
| 11.889         | 11.9078        | 18.8311           | 30                | 17.8595         | 15.6102         | 30               |
| 15.1721        | 15.9023        | 20.0161           | 30                | 14.1489         | 14.1016         | 16.8757          |
| 15.2544        | 15.0731        | 20.7426           | 30                | 14.1029         | 13.936          | 30               |
| 14.2349        | 30             | 15.4647           | 30                | 30              | 30              | 14.9282          |
| 15.6304        | 15.897         | 21.8559           | 30                | 16.0691         | 15.5279         | 30               |
| 12.7123        | 12.4913        | 24.5622           | 30                | 30              | 14.3282         | 15.4492          |
| 30             | 30             | 21.406            | 30                | 30              | 15.7507         | 30               |
| 30             | 30             | 20.3357           | 30                | 13.2135         | 12.5227         | 14.7597          |
| 30             | 30             | 24.106            | 30                | 14.2266         | 12.4909         | 15.6341          |
| 14.0126        | 30             | 21.4308           | 30                | 18.4936         | 16.2896         | 30               |
| 9.58653        | 10.0697        | 11.5913           | 12.1086           | 12.3289         | 11.3947         | 4.85951          |
| 30             | 30             | 21.6953           | 30                | 13.5328         | 15.0188         | 30               |
| 30             | 30             | 18.6392           | 30                | 15.4            | 13.2866         | 30               |
| 13.4971        | 15.9807        | 17.6804           | 30                | 13.7439         | 13.6363         | 30               |
| 15.296         | 15.7781        | 17.2193           | 30                | 15.2448         | 30              | 30               |
| 30             | 30             | 30                | 30                | 30              | 14.4427         | 30               |
| 11.5137        | 12.3982        | 17.1928           | 30                | 15.874          | 13.9699         | 30               |
| 15.0895        | 13.1393        | 20.2312           | 30                | 14.8639         | 12.9494         | 30               |
| 14.031         | 30             | 20.3166           | 30                | 14.6052         | 14.6548         | 12.1276          |
| 14.1469        | 14.7186        | 19.5961           | 30                | 15.2024         | 30              | 30               |
| 15.1153        | 14.9241        | 18.6272           | 30                | 17.7194         | 14.4557         | 30               |
| 30             | 30             | 18.3218           | 30                | 16.4667         | 14.5034         | 30               |
| 15.043         | 30             | 21.8295           | 30                | 16.9413         | 14.3921         | 30               |
| 13.6647        | 30             | 19.2712           | 30                | 15.3313         | 15.3662         | 30               |
| 15.0975        | 13.9193        | 21.6116           | 30                | 15.7031         | 14.1908         | 30               |
| 15.1306        | 14.3139        | 30                | 30                | 20.3702         | 14.3854         | 30               |
| 30             | 30             | 30                | 30                | 17.086          | 15.5959         | 30               |
| 11.9906        | 13.5136        | 22.289            | 30                | 21.7937         | 14.6355         | 15.6757          |
| 13.1035        | 14.1181        | 21.8128           | 30                | 13.3385         | 14.579          | 30               |
| 13.3487        | 13.6063        | 19.6629           | 30                | 13.7581         | 12.6629         | 30               |
| 9.23886        | 9.83063        | 11.5082           | 11.9656           | 13.8597         | 11.9103         | 5.36588          |
| 13.1702        | 12.8408        | 20.0171           | 30                | 16.0851         | 14.7074         | 21.8333          |

|         |         |         |         |         |         |         |
|---------|---------|---------|---------|---------|---------|---------|
| 30      | 14.0199 | 19.2579 | 30      | 15.504  | 14.0207 | 24.615  |
| 14.1541 | 12.9688 | 18.2591 | 30      | 14.6383 | 14.2217 | 24.3528 |
| 13.6393 | 13.7554 | 18.8575 | 30      | 17.1997 | 14.3491 | 30      |
| 12.463  | 13.561  | 20.543  | 30      | 16.5281 | 14.5009 | 30      |
| 13.5347 | 13.7966 | 19.6742 | 30      | 15.2494 | 13.0612 | 30      |
| 30      | 30      | 22.6401 | 30      | 14.4873 | 12.7723 | 30      |
| 13.578  | 16.0994 | 24.1731 | 30      | 15.7628 | 15.7552 | 30      |
| 30      | 14.8538 | 18.7395 | 30      | 16.9503 | 13.9254 | 30      |
| 30      | 30      | 19.6946 | 30      | 30      | 13.5947 | 30      |
| 30      | 30      | 16.1905 | 30      | 17.1382 | 14.7678 | 30      |
| 12.8849 | 14.3006 | 22.1155 | 30      | 14.5123 | 15.5527 | 30      |
| 12.1054 | 13.1184 | 14.4088 | 14.3914 | 16.9231 | 14.9131 | 30      |
| 30      | 14.2282 | 30      | 30      | 17.5755 | 30      | 11.173  |
| 30      | 30      | 18.9278 | 30      | 30      | 15.4295 | 30      |
| 30      | 30      | 17.6019 | 30      | 30      | 30      | 30      |
| 30      | 30      | 17.6734 | 30      | 15.5132 | 14.3478 | 30      |
| 30      | 30      | 22.1189 | 30      | 14.5839 | 13.7809 | 30      |
| 30      | 30      | 20.8133 | 30      | 15.9753 | 14.9738 | 30      |
| 30      | 30      | 19.2393 | 30      | 14.7154 | 16.3819 | 30      |
| 30      | 13.8809 | 21.9697 | 30      | 16.2979 | 30      | 30      |
| 14.8834 | 30      | 20.3733 | 30      | 16.0901 | 15.3911 | 15.7509 |
| 14.0636 | 14.4378 | 15.9595 | 30      | 18.0379 | 14.5763 | 30      |
| 14.0387 | 30      | 20.6629 | 30      | 15.4725 | 30      | 30      |
| 14.9372 | 15.9434 | 22.4352 | 30      | 15.4004 | 15.1838 | 11.0094 |
| 30      | 30      | 20.5294 | 30      | 16.7134 | 13.4369 | 15.4512 |
| 30      | 30      | 19.3503 | 30      | 15.55   | 16.8352 | 30      |
| 15.0256 | 16.0109 | 20.5587 | 30      | 15.3634 | 14.3472 | 18.7008 |
| 10.5775 | 11.0189 | 12.9302 | 15.7404 | 14.1839 | 12.9538 | 5.79335 |
| 30      | 15.5859 | 20.0088 | 30      | 15.4894 | 12.7606 | 24.8677 |
| 12.5838 | 13.1917 | 22.2166 | 30      | 30      | 30      | 30      |
| 30      | 30      | 20.7418 | 30      | 14.1772 | 13.1444 | 30      |
| 14.3815 | 14.5723 | 21.978  | 30      | 30      | 30      | 14.6613 |
| 13.5215 | 12.832  | 19.4494 | 30      | 17.2609 | 13.6516 | 30      |
| 13.9365 | 13.9983 | 19.8334 | 30      | 30      | 30      | 30      |
| 16.4616 | 14.8176 | 19.7089 | 30      | 17.2201 | 14.2103 | 30      |
| 30      | 16.9326 | 23.449  | 30      | 13.1478 | 13.4058 | 30      |
| 14.1583 | 16.0484 | 21.3704 | 30      | 30      | 30      | 14.5849 |
| 13.3667 | 13.584  | 22.9902 | 30      | 13.2201 | 11.7757 | 13.4383 |
| 14.7702 | 15.2142 | 21.2116 | 30      | 30      | 15.3619 | 15.5892 |
| 12.0077 | 13.6253 | 20.441  | 30      | 30      | 30      | 30      |
| 30      | 30      | 18.5703 | 30      | 14.1529 | 13.3514 | 30      |

|         |         |         |         |         |         |         |
|---------|---------|---------|---------|---------|---------|---------|
| 12.551  | 13.2279 | 16.632  | 30      | 15.0657 | 13.2152 | 30      |
| 13.5475 | 30      | 23.4463 | 30      | 30      | 15.5685 | 14.314  |
| 15.4967 | 30      | 23.2851 | 30      | 30      | 15.2686 | 30      |
| 9.13264 | 9.96816 | 12.6935 | 15.8795 | 15.8217 | 13.1323 | 5.01437 |
| 14.0594 | 13.6166 | 20.6269 | 30      | 15.2425 | 12.988  | 14.0335 |
| 30      | 30      | 19.8015 | 30      | 15.7041 | 15.499  | 30      |
| 14.5514 | 13.8286 | 22.1024 | 30      | 16.2882 | 15.0066 | 30      |
| 30      | 30      | 18.589  | 30      | 14.4476 | 15.4743 | 30      |
| 30      | 30      | 19.6827 | 30      | 30      | 30      | 30      |
| 13.9394 | 14.4503 | 22.7866 | 30      | 17.5275 | 14.1226 | 30      |
| 30      | 16.032  | 30      | 30      | 13.9174 | 15.9232 | 30      |
| 14.8975 | 13.7251 | 20.6624 | 30      | 17.1614 | 13.8489 | 30      |
| 15.2185 | 14.0782 | 22.2325 | 30      | 21.3277 | 15.3608 | 30      |
| 30      | 30      | 19.9973 | 30      | 15.595  | 30      | 30      |

| <b>Pcna_A34</b> | <b>Pcna_A46</b> | <b>Ppargc1b_A5</b> | <b>Ppargc1b_A7</b> | <b>Rhoa_A82</b> | <b>Rhoa_A94</b> | <b>Saa2_A11</b> |
|-----------------|-----------------|--------------------|--------------------|-----------------|-----------------|-----------------|
| 15.3153         | 14.1263         | 30                 | 30                 | 14.0954         | 14.0201         | 21.5728         |
| 12.1759         | 10.6132         | 15.4199            | 12.7281            | 9.47817         | 10.1714         | 22.0075         |
| 14.263          | 13.3807         | 30                 | 30                 | 12.0809         | 14.6077         | 30              |
| 13.7169         | 12.3228         | 30                 | 30                 | 8.85408         | 10.8404         | 30              |
| 15.4291         | 15.0592         | 14.3279            | 14.819             | 8.87465         | 10.3328         | 22.3744         |
| 14.709          | 15.2891         | 30                 | 30                 | 12.4126         | 12.5556         | 30              |
| 14.8509         | 14.0081         | 30                 | 17.0558            | 9.79771         | 10.7294         | 30              |
| 12.9291         | 11.835          | 30                 | 30                 | 9.18287         | 11.0257         | 30              |
| 12.9686         | 13.2589         | 14.9908            | 30                 | 10.2428         | 11.2054         | 17.9211         |
| 16.7979         | 12.9633         | 30                 | 13.0998            | 9.83998         | 10.9189         | 30              |
| 13.8057         | 12.6132         | 30                 | 14.0586            | 9.88914         | 11.0031         | 30              |
| 12.929          | 12.6699         | 30                 | 30                 | 9.46485         | 11.0634         | 17.8952         |
| 13.4784         | 13.1348         | 30                 | 30                 | 9.67879         | 10.3702         | 30              |
| 12.3835         | 12.4378         | 30                 | 30                 | 9.39129         | 10.6778         | 30              |
| 13.4547         | 12.7455         | 30                 | 30                 | 9.59474         | 10.9464         | 30              |
| 13.2292         | 12.0554         | 30                 | 30                 | 9.03243         | 11.1951         | 22.9433         |
| 14.0311         | 11.5943         | 30                 | 14.8627            | 8.99074         | 10.8673         | 30              |
| 14.8344         | 12.8291         | 30                 | 30                 | 10.3376         | 10.8628         | 30              |
| 9.22518         | 8.01805         | 12.8958            | 12.2028            | 8.2238          | 9.68796         | 17.0277         |
| 12.7539         | 12.4373         | 30                 | 30                 | 9.24498         | 10.7533         | 30              |
| 14.8614         | 13.2144         | 30                 | 30                 | 8.86891         | 10.7028         | 19.2576         |
| 13.3387         | 12.0469         | 30                 | 30                 | 10.2533         | 10.5954         | 30              |
| 13.5876         | 12.4472         | 30                 | 30                 | 9.33446         | 11.1942         | 30              |
| 13.604          | 14.2838         | 15.2403            | 14.9478            | 9.63129         | 10.8866         | 22.0346         |
| 12.0079         | 11.7083         | 30                 | 30                 | 9.13892         | 10.495          | 24.7847         |
| 14.5728         | 12.3647         | 30                 | 15.1451            | 9.12844         | 10.7484         | 30              |
| 11.9245         | 12.2813         | 30                 | 14.0804            | 9.00037         | 10.5996         | 22.2176         |
| 14.1677         | 11.9621         | 30                 | 30                 | 9.29031         | 10.8443         | 30              |
| 12.9237         | 12.6366         | 14.1952            | 14.8422            | 10.1205         | 11.1205         | 30              |
| 13.4704         | 12.7002         | 30                 | 30                 | 9.29424         | 10.7738         | 30              |
| 14.1577         | 14.1052         | 30                 | 30                 | 10.0214         | 10.7678         | 22.0297         |
| 12.4333         | 13.5804         | 30                 | 30                 | 8.97072         | 11.0166         | 21.8594         |
| 12.724          | 11.8866         | 30                 | 30                 | 9.06988         | 10.3107         | 30              |
| 13.247          | 11.9451         | 30                 | 30                 | 9.17668         | 10.6565         | 24.0419         |
| 14.8125         | 15.304          | 30                 | 22.9801            | 10.3259         | 11.0863         | 30              |
| 12.7623         | 12.0446         | 30                 | 30                 | 8.97324         | 10.3383         | 30              |
| 15.3579         | 12.2858         | 30                 | 30                 | 9.56922         | 10.7592         | 20.316          |
| 12.9721         | 12.5277         | 30                 | 14.5589            | 9.06611         | 11.0739         | 30              |
| 12.8564         | 10.7616         | 13.8036            | 10.7334            | 8.2608          | 9.61278         | 20.6434         |
| 13.2082         | 12.2709         | 30                 | 30                 | 9.1195          | 11.1975         | 16.5978         |

|         |         |         |         |         |         |         |
|---------|---------|---------|---------|---------|---------|---------|
| 14.1201 | 11.2165 | 30      | 12.5627 | 9.57457 | 11.2319 | 16.7001 |
| 14.8208 | 12.2464 | 30      | 23.8344 | 8.87908 | 10.5811 | 19.554  |
| 12.5577 | 11.8679 | 30      | 30      | 10.1494 | 10.5684 | 19.5157 |
| 15.6539 | 12.1401 | 30      | 30      | 9.67187 | 10.6915 | 30      |
| 14.4643 | 11.8939 | 30      | 30      | 9.20625 | 10.3574 | 30      |
| 12.3049 | 11.6915 | 15.0208 | 13.9494 | 8.30227 | 9.27019 | 30      |
| 13.216  | 12.0588 | 15.896  | 12.6251 | 9.41847 | 11.1048 | 30      |
| 12.637  | 11.8762 | 15.1154 | 30      | 9.22264 | 10.507  | 22.3442 |
| 13.2495 | 13.4816 | 15.0124 | 12.6779 | 9.23892 | 11.5238 | 30      |
| 13.3257 | 11.5123 | 30      | 17.12   | 9.596   | 11.4748 | 22.0956 |
| 13.429  | 13.0889 | 30      | 13.9546 | 10.3373 | 11.2906 | 30      |
| 18.4249 | 13.8269 | 30      | 15.3477 | 10.8885 | 13.3202 | 21.1807 |
| 12.711  | 14.1315 | 30      | 30      | 10.3564 | 11.4068 | 30      |
| 13.4718 | 15.8248 | 30      | 15.08   | 9.80758 | 10.7601 | 18.2981 |
| 17.4298 | 15.3167 | 30      | 24.3912 | 21.305  | 16.9115 | 18.3246 |
| 13.5539 | 13.7116 | 30      | 30      | 11.9567 | 12.1888 | 21.8952 |
| 13.0855 | 12.9291 | 30      | 14.5143 | 10.5955 | 11.9632 | 18.652  |
| 12.9587 | 12.1632 | 30      | 30      | 9.98029 | 11.6034 | 25.0328 |
| 12.2159 | 11.7216 | 30      | 30      | 9.87875 | 11.2584 | 30      |
| 13.1107 | 13.9728 | 15.238  | 13.5147 | 10.3217 | 11.3581 | 30      |
| 13.2722 | 13.6537 | 15.0675 | 14.0324 | 10.4833 | 11.5229 | 30      |
| 12.4866 | 11.7219 | 30      | 13.1732 | 10.3324 | 10.9066 | 20.7493 |
| 12.7056 | 12.9132 | 30      | 15.2187 | 10.0609 | 11.4056 | 25.8558 |
| 15.017  | 13.2366 | 30      | 30      | 10.2243 | 10.9028 | 21.5594 |
| 13.8487 | 12.53   | 30      | 15.2575 | 9.69978 | 10.7922 | 30      |
| 13.5639 | 12.7511 | 30      | 30      | 9.75994 | 10.9197 | 30      |
| 14.037  | 12.4232 | 30      | 23.2644 | 10.1086 | 11.9026 | 16.7412 |
| 12.4327 | 12.0508 | 30      | 14.2156 | 9.31617 | 9.81896 | 30      |
| 18.1066 | 12.4353 | 30      | 13.1982 | 10.0614 | 11.2248 | 30      |
| 13.4333 | 13.5486 | 30      | 30      | 11.1384 | 10.9623 | 16.6234 |
| 13.774  | 11.6239 | 30      | 30      | 10.1657 | 11.2528 | 30      |
| 14.4181 | 12.3976 | 30      | 30      | 10.0196 | 11.6209 | 30      |
| 12.791  | 12.195  | 30      | 30      | 9.72486 | 11.2701 | 30      |
| 14.9951 | 14.1692 | 15.3358 | 30      | 10.5998 | 11.6189 | 30      |
| 13.4563 | 11.5579 | 30      | 30      | 9.88183 | 10.7664 | 30      |
| 13.3753 | 12.2468 | 30      | 30      | 9.66669 | 11.2086 | 20.5158 |
| 14.5156 | 12.7393 | 30      | 14.2866 | 10.2826 | 11.493  | 30      |
| 14.2295 | 12.987  | 30      | 30      | 9.45974 | 10.8934 | 19.2981 |
| 13.1848 | 13.1468 | 30      | 13.925  | 9.65585 | 10.9358 | 30      |
| 13.6208 | 12.4486 | 30      | 30      | 9.95302 | 10.7053 | 30      |
| 13.3569 | 11.9724 | 13.6925 | 15.1181 | 9.66801 | 11.2386 | 30      |



|         |         |         |         |         |         |         |
|---------|---------|---------|---------|---------|---------|---------|
| 13.2115 | 12.1626 | 30      | 30      | 9.62853 | 10.7298 | 30      |
| 13.9466 | 12.6276 | 15.3821 | 13.9268 | 10.79   | 11.1116 | 18.4162 |
| 14.4382 | 15.1875 | 30      | 13.4501 | 10.7386 | 12.136  | 30      |
| 10.2765 | 10.1488 | 16.0079 | 13.3946 | 9.77687 | 10.4382 | 30      |
| 12.4788 | 11.2457 | 30      | 30      | 9.12097 | 10.5665 | 30      |
| 13.1766 | 12.1728 | 30      | 30      | 9.76766 | 11.1357 | 21.6374 |
| 13.6935 | 11.7569 | 30      | 15.1419 | 8.85672 | 10.3262 | 30      |
| 13.5724 | 11.7111 | 30      | 30      | 9.44288 | 11.8461 | 17.0027 |
| 23.6067 | 14.3103 | 30      | 30      | 10.5494 | 11.701  | 30      |
| 30      | 22.3282 | 13.7134 | 14.0039 | 9.89598 | 11.1057 | 30      |
| 12.7761 | 12.5746 | 30      | 30      | 10.5687 | 10.951  | 18.8601 |
| 13.4837 | 12.9558 | 30      | 15.2578 | 10.7418 | 11.3281 | 30      |
| 13.1475 | 13.743  | 30      | 30      | 10.4336 | 12.0609 | 30      |
| 13.0773 | 11.9513 | 30      | 15.0825 | 10.1013 | 11.8359 | 21.0093 |

| Saa2_A23 | Sirt3_A35 | Sirt3_A47 | Sox9_A59 | Sox9_A71 | Tat_A83 | Tat_A95 |
|----------|-----------|-----------|----------|----------|---------|---------|
| 14.8289  | 30        | 30        | 30       | 30       | 30      | 30      |
| 15.7994  | 15.5362   | 30        | 9.58063  | 18.6453  | 20.7066 | 30      |
| 17.0768  | 15.6675   | 15.7731   | 30       | 30       | 30      | 30      |
| 18.0391  | 30        | 30        | 9.76139  | 19.6635  | 30      | 30      |
| 17.6831  | 16.1158   | 22.5365   | 9.18854  | 17.7216  | 30      | 30      |
| 30       | 30        | 30        | 21.5817  | 30       | 30      | 30      |
| 22.3633  | 30        | 30        | 9.64009  | 17.8287  | 30      | 30      |
| 16.9018  | 30        | 15.2085   | 9.21606  | 17.3047  | 30      | 30      |
| 15.1798  | 22.2368   | 30        | 9.32451  | 19.3513  | 30      | 30      |
| 24.5878  | 30        | 30        | 10.2368  | 19.5617  | 30      | 30      |
| 15.9784  | 17.6719   | 14.5883   | 9.80678  | 19.1001  | 30      | 30      |
| 15.757   | 16.7135   | 16.0418   | 9.60163  | 17.2375  | 30      | 30      |
| 20.1728  | 17.4073   | 15.3154   | 10.0819  | 19.2791  | 30      | 30      |
| 30       | 14.4952   | 15.1405   | 10.4709  | 19.7571  | 30      | 30      |
| 19.6604  | 15.9703   | 30        | 9.10664  | 17.9087  | 30      | 30      |
| 16.8885  | 15.9621   | 14.5478   | 8.92605  | 18.9259  | 30      | 30      |
| 30       | 30        | 30        | 9.0392   | 16.8695  | 30      | 30      |
| 15.232   | 30        | 30        | 9.82638  | 17.8887  | 30      | 30      |
| 14.6871  | 15.7342   | 15.3383   | 9.30703  | 18.9788  | 30      | 30      |
| 17.0808  | 30        | 30        | 9.53808  | 19.0157  | 30      | 30      |
| 21.8267  | 21.3717   | 18.7732   | 9.82913  | 18.3333  | 30      | 30      |
| 30       | 30        | 30        | 8.59556  | 16.3865  | 30      | 30      |
| 30       | 30        | 30        | 8.76286  | 17.2082  | 30      | 30      |
| 15.6741  | 20.6104   | 20.0825   | 9.70459  | 18.9594  | 30      | 30      |
| 30       | 15.4801   | 30        | 10.6405  | 21.1006  | 30      | 30      |
| 18.0249  | 23.675    | 30        | 9.27907  | 16.7976  | 30      | 30      |
| 21.1152  | 21.5685   | 30        | 8.6721   | 17.122   | 22.4633 | 30      |
| 30       | 19.4789   | 30        | 11.1933  | 21.1933  | 30      | 30      |
| 17.3104  | 15.2827   | 15.9164   | 11.1508  | 21.9077  | 30      | 30      |
| 30       | 30        | 30        | 10.0889  | 19.4628  | 30      | 30      |
| 15.5101  | 15.6052   | 15.2206   | 10.2043  | 16.9989  | 30      | 30      |
| 14.0175  | 30        | 30        | 10.2707  | 20.7468  | 30      | 30      |
| 30       | 30        | 21.8694   | 8.40553  | 17.6277  | 30      | 30      |
| 30       | 16.17     | 19.0054   | 9.43271  | 17.9554  | 30      | 30      |
| 16.9316  | 30        | 15.2777   | 9.85135  | 19.1475  | 30      | 30      |
| 17.2848  | 30        | 23.9293   | 8.25155  | 16.5557  | 30      | 30      |
| 15.5725  | 30        | 30        | 8.67827  | 17.2635  | 30      | 30      |
| 20.8785  | 30        | 30        | 10.0094  | 18.4727  | 30      | 30      |
| 15.4788  | 30        | 15.1841   | 10.0056  | 18.517   | 30      | 30      |
| 16.4106  | 30        | 30        | 11.1693  | 20.0559  | 30      | 30      |

|         |         |         |         |         |         |         |
|---------|---------|---------|---------|---------|---------|---------|
| 14.6756 | 30      | 30      | 10.9824 | 20.4573 | 30      | 30      |
| 15.2808 | 30      | 30      | 8.36554 | 15.9978 | 30      | 30      |
| 15.9722 | 21.4066 | 30      | 9.79396 | 18.9536 | 30      | 30      |
| 21.2345 | 30      | 30      | 8.94413 | 18.5805 | 30      | 30      |
| 17.4428 | 30      | 30      | 10.8829 | 20.2715 | 30      | 30      |
| 21.4576 | 30      | 30      | 10.1379 | 19.0543 | 30      | 30      |
| 26.1888 | 30      | 30      | 10.0888 | 17.9467 | 30      | 30      |
| 18.4691 | 14.0824 | 14.953  | 8.54464 | 16.6553 | 30      | 30      |
| 15.1854 | 30      | 14.9109 | 9.634   | 18.4004 | 30      | 30      |
| 19.7281 | 21.6381 | 30      | 9.85783 | 18.7087 | 30      | 30      |
| 17.0118 | 30      | 21.3959 | 11.0507 | 19.63   | 30      | 30      |
| 20.2645 | 30      | 30      | 24.2851 | 30      | 27.2342 | 30      |
| 16.0799 | 15.5908 | 15.2039 | 10.2007 | 18.3996 | 30      | 30      |
| 13.8822 | 30      | 14.9181 | 9.55444 | 16.9496 | 30      | 30      |
| 17.9409 | 30      | 30      | 30      | 21.6352 | 30      | 30      |
| 16.4676 | 30      | 30      | 13.0866 | 23.6669 | 30      | 30      |
| 16.1812 | 30      | 30      | 11.4823 | 21.3137 | 30      | 30      |
| 30      | 30      | 15.0442 | 9.95071 | 18.5407 | 30      | 30      |
| 30      | 30      | 30      | 10.0881 | 18.3344 | 30      | 30      |
| 27.9007 | 30      | 30      | 10.8497 | 19.4391 | 30      | 30      |
| 16.1128 | 30      | 30      | 10.6573 | 18.5811 | 30      | 30      |
| 16.0144 | 30      | 30      | 10.4515 | 19.7435 | 30      | 30      |
| 30      | 30      | 30      | 8.07571 | 16.3186 | 30      | 18.2643 |
| 18.5852 | 30      | 30      | 9.73546 | 17.4718 | 30      | 30      |
| 30      | 14.9184 | 30      | 8.80484 | 16.4906 | 22.795  | 30      |
| 30      | 15.9637 | 30      | 10.2649 | 19.8128 | 30      | 30      |
| 14.8284 | 30      | 30      | 9.86628 | 18.0879 | 30      | 30      |
| 19.6674 | 15.8846 | 30      | 9.99691 | 19.0826 | 30      | 30      |
| 19.4544 | 30      | 14.9828 | 10.7794 | 19.6617 | 30      | 30      |
| 14.6835 | 30      | 30      | 9.89682 | 19.5548 | 30      | 30      |
| 30      | 30      | 27.7899 | 12.5341 | 20.835  | 30      | 30      |
| 30      | 30      | 30      | 10.596  | 18.8085 | 30      | 30      |
| 23.2746 | 15.0737 | 30      | 9.16458 | 18.6472 | 23.267  | 15.8948 |
| 30      | 30      | 30      | 9.53219 | 17.8631 | 30      | 30      |
| 21.8327 | 14.8158 | 23.8066 | 9.81805 | 17.7087 | 30      | 30      |
| 30      | 30      | 30      | 10.0563 | 19.538  | 22.5811 | 30      |
| 30      | 30      | 30      | 11.7822 | 21.3215 | 30      | 30      |
| 14.4509 | 23.6265 | 30      | 30      | 23.4073 | 13.9987 | 30      |
| 30      | 30      | 30      | 11.2682 | 19.0089 | 30      | 30      |
| 30      | 30      | 15.3409 | 9.24049 | 17.9507 | 30      | 30      |
| 21.7667 | 30      | 30      | 11.7897 | 21.9909 | 30      | 30      |

|         |         |         |         |         |         |    |
|---------|---------|---------|---------|---------|---------|----|
| 19.0328 | 30      | 30      | 10.6184 | 19.8921 | 30      | 30 |
| 14.1359 | 30      | 30      | 9.75207 | 18.3442 | 30      | 30 |
| 19.4573 | 30      | 30      | 10.688  | 19.4096 | 30      | 30 |
| 30      | 30      | 15.1243 | 9.51201 | 17.7302 | 30      | 30 |
| 14.6644 | 30      | 30      | 10.0892 | 18.3069 | 30      | 30 |
| 23.4148 | 30      | 30      | 10.9481 | 20.3625 | 30      | 30 |
| 30      | 30      | 30      | 10.7668 | 19.1332 | 30      | 30 |
| 16.161  | 24.1501 | 23.803  | 11.2002 | 19.9495 | 24.4768 | 30 |
| 16.0322 | 30      | 30      | 10.6375 | 19.3391 | 30      | 30 |
| 30      | 30      | 25.6152 | 9.19892 | 17.3121 | 30      | 30 |
| 14.4283 | 15.9653 | 16.2342 | 10.0673 | 18.6219 | 30      | 30 |
| 16.9758 | 30      | 24.0177 | 10.8777 | 20.5583 | 30      | 30 |
| 15.9187 | 30      | 30      | 9.54697 | 18.7599 | 30      | 30 |
| 13.8393 | 30      | 22.9896 | 13.6451 | 23.217  | 30      | 30 |

| Tcf4_A12 | Tcf7l2_A24 | Tert_A36 | Tert_A48 | Wnt3_A60 | Wnt3_A72 | Wnt6_A84 |
|----------|------------|----------|----------|----------|----------|----------|
| 30       | 30         | 30       | 30       | 30       | 30       | 30       |
| 11.6014  | 14.5402    | 30       | 30       | 11.8959  | 12.5222  | 30       |
| 30       | 24.9256    | 30       | 30       | 30       | 30       | 30       |
| 12.0734  | 16.515     | 30       | 30       | 10.6955  | 12.4946  | 30       |
| 12.3244  | 14.6263    | 30       | 30       | 10.6241  | 11.168   | 30       |
| 30       | 30         | 30       | 30       | 30       | 21.957   | 30       |
| 12.3788  | 15.32      | 30       | 30       | 10.5164  | 11.3235  | 30       |
| 13.1611  | 15.4526    | 30       | 30       | 10.3935  | 11.8151  | 30       |
| 12.3627  | 17.2026    | 30       | 30       | 11.531   | 14.1457  | 30       |
| 13.5485  | 17.1085    | 30       | 30       | 11.4494  | 11.6734  | 30       |
| 11.6151  | 14.897     | 21.9873  | 30       | 10.4233  | 12.0015  | 30       |
| 13.0096  | 17.2756    | 30       | 30       | 10.3269  | 11.8924  | 30       |
| 11.4219  | 15.5899    | 30       | 30       | 10.1626  | 11.3464  | 30       |
| 11.7     | 14.6259    | 30       | 30       | 10.9364  | 11.37    | 30       |
| 12.9886  | 15.4249    | 30       | 30       | 12.4686  | 12.9854  | 30       |
| 11.6515  | 14.4979    | 26.6654  | 30       | 10.3267  | 11.2659  | 30       |
| 12.8726  | 16.3954    | 30       | 30       | 11.5791  | 14.0762  | 30       |
| 11.6922  | 13.7923    | 30       | 30       | 10.4311  | 11.0365  | 30       |
| 12.09    | 15.5449    | 13.388   | 15.7822  | 10.1852  | 12.1453  | 30       |
| 11.7507  | 16.2273    | 20.6188  | 30       | 10.5817  | 11.6458  | 30       |
| 11.5913  | 13.35      | 30       | 30       | 11.0192  | 12.4644  | 30       |
| 13.1216  | 16.5745    | 30       | 30       | 10.6918  | 11.9457  | 30       |
| 12.5778  | 15.4538    | 30       | 30       | 10.5519  | 13.122   | 30       |
| 10.9148  | 13.9765    | 30       | 30       | 10.2038  | 12.1759  | 30       |
| 13.415   | 16.6959    | 30       | 30       | 10.1351  | 11.6342  | 30       |
| 12.3813  | 14.4731    | 30       | 30       | 11.3999  | 13.6711  | 30       |
| 13.0678  | 14.6289    | 30       | 30       | 11.6139  | 12.5385  | 30       |
| 11.4945  | 13.6054    | 30       | 30       | 11.6403  | 12.0699  | 30       |
| 13.9662  | 17.3824    | 30       | 30       | 11.5056  | 13.3869  | 30       |
| 11.9009  | 15.4919    | 30       | 30       | 10.9677  | 13.4739  | 30       |
| 13.8666  | 15.5506    | 30       | 30       | 11.9317  | 13.6468  | 30       |
| 12.6276  | 15.6286    | 30       | 30       | 10.6171  | 13.2736  | 30       |
| 11.9253  | 14.712     | 30       | 30       | 11.0064  | 12.3249  | 30       |
| 12.7987  | 14.3479    | 30       | 30       | 10.5457  | 12.6186  | 30       |
| 13.4414  | 15.1047    | 30       | 30       | 11.4419  | 12.4597  | 30       |
| 11.8671  | 14.0793    | 30       | 30       | 9.67668  | 12.4431  | 30       |
| 14.2783  | 15.2325    | 30       | 30       | 11.1165  | 13.2697  | 30       |
| 12.2733  | 15.7142    | 30       | 30       | 10.0256  | 12.2921  | 30       |
| 11.2045  | 14.0055    | 15.3275  | 30       | 10.4842  | 11.538   | 30       |
| 12.1626  | 14.4199    | 30       | 30       | 10.3118  | 11.6525  | 30       |

|         |         |         |    |         |         |    |
|---------|---------|---------|----|---------|---------|----|
| 12.8334 | 16.0524 | 30      | 30 | 11.2416 | 11.7188 | 30 |
| 13.2988 | 15.5816 | 30      | 30 | 10.327  | 11.5107 | 30 |
| 12.7013 | 16.063  | 30      | 30 | 10.2491 | 12.0654 | 30 |
| 30      | 17.9386 | 30      | 30 | 12.6815 | 12.0176 | 30 |
| 11.068  | 15.3802 | 30      | 30 | 10.3897 | 11.6563 | 30 |
| 12.1155 | 14.5947 | 15.4522 | 30 | 10.4802 | 11.8497 | 30 |
| 12.3694 | 15.3361 | 30      | 30 | 10.6126 | 11.7556 | 30 |
| 12.017  | 15.2964 | 30      | 30 | 9.90873 | 11.5036 | 30 |
| 12.8438 | 15.8407 | 30      | 30 | 10.7277 | 12.5971 | 30 |
| 11.6263 | 14.4293 | 30      | 30 | 11.1637 | 12.5325 | 30 |
| 11.8422 | 15.0851 | 30      | 30 | 10.375  | 12.4433 | 30 |
| 30      | 30      | 24.3369 | 30 | 30      | 24.5541 | 30 |
| 12.2133 | 13.9524 | 30      | 30 | 10.5459 | 12.3991 | 30 |
| 14.1957 | 15.5962 | 30      | 30 | 10.3011 | 12.7857 | 30 |
| 30      | 30      | 30      | 30 | 30      | 30      | 30 |
| 12.8432 | 17.4739 | 30      | 30 | 11.4662 | 14.0189 | 30 |
| 12.495  | 15.2785 | 30      | 30 | 11.6672 | 13.3922 | 30 |
| 12.4591 | 14.3881 | 30      | 30 | 10.6052 | 11.3267 | 30 |
| 13.3004 | 18.3072 | 30      | 30 | 11.0884 | 12.6246 | 30 |
| 13.798  | 16.4899 | 30      | 30 | 11.6754 | 12.9694 | 30 |
| 11.2844 | 14.7151 | 30      | 30 | 10.6458 | 13.0816 | 30 |
| 13.9337 | 17.21   | 30      | 30 | 10.4515 | 12.2791 | 30 |
| 13.4179 | 17.104  | 30      | 30 | 10.9039 | 12.894  | 30 |
| 12.3332 | 15.3964 | 30      | 30 | 9.61812 | 11.8722 | 30 |
| 12.5975 | 17.1475 | 23.105  | 30 | 10.2351 | 11.8416 | 30 |
| 12.6139 | 15.3681 | 30      | 30 | 10.644  | 11.4244 | 30 |
| 12.4714 | 15.0735 | 30      | 30 | 11.3401 | 12.6596 | 30 |
| 13.2311 | 17.0289 | 30      | 30 | 10.6911 | 12.5972 | 30 |
| 12.2667 | 13.9219 | 30      | 30 | 11.6325 | 12.9837 | 30 |
| 13.0573 | 16.7957 | 30      | 30 | 12.2036 | 15.828  | 30 |
| 12.9515 | 17.3495 | 30      | 30 | 11.5848 | 12.8441 | 30 |
| 16.4349 | 30      | 24.5237 | 30 | 12.4091 | 12.8266 | 30 |
| 12.4106 | 14.498  | 30      | 30 | 10.7555 | 11.5227 | 30 |
| 13.511  | 15.508  | 30      | 30 | 12.5803 | 12.1215 | 30 |
| 13.9153 | 22.984  | 30      | 30 | 10.8857 | 13.3787 | 30 |
| 12.6867 | 17.5318 | 30      | 30 | 10.9129 | 12.9057 | 30 |
| 12.9979 | 16.4351 | 30      | 30 | 11.2973 | 12.5037 | 30 |
| 12.1865 | 16.0136 | 30      | 30 | 10.6815 | 12.1319 | 30 |
| 12.5348 | 16.7936 | 30      | 30 | 11.2633 | 12.5771 | 30 |
| 11.6948 | 16.6401 | 30      | 30 | 11.4293 | 11.9366 | 30 |
| 11.9038 | 17.5093 | 30      | 30 | 10.3214 | 11.8481 | 30 |

|         |         |         |         |         |         |    |
|---------|---------|---------|---------|---------|---------|----|
| 11.4906 | 15.4922 | 30      | 30      | 10.4122 | 12.138  | 30 |
| 13.0332 | 16.4778 | 30      | 30      | 12.1997 | 12.174  | 30 |
| 30      | 16.7587 | 22.4899 | 30      | 13.7716 | 14.7708 | 30 |
| 11.989  | 14.8353 | 15.3941 | 15.8064 | 10.434  | 12.7907 | 30 |
| 14.9326 | 19.062  | 30      | 30      | 11.6945 | 12.4676 | 30 |
| 11.5902 | 15.7836 | 30      | 30      | 11.3107 | 12.7805 | 30 |
| 12.5163 | 19.5192 | 30      | 30      | 9.95107 | 10.9909 | 30 |
| 14.137  | 30      | 25.4598 | 30      | 10.6311 | 13.0073 | 30 |
| 13.5208 | 17.9953 | 30      | 30      | 12.1345 | 12.7365 | 30 |
| 13.0703 | 16.4749 | 30      | 30      | 12.2704 | 12.106  | 30 |
| 14.496  | 16.2317 | 30      | 30      | 9.70965 | 11.8013 | 30 |
| 12.1238 | 17.0922 | 30      | 30      | 10.3953 | 11.9488 | 30 |
| 12.2873 | 15.6488 | 30      | 30      | 11.2861 | 14.1987 | 30 |
| 13.8273 | 16.5312 | 30      | 30      | 12.9727 | 14.861  | 30 |

**Wnt6\_A96**

24.8808

30

24.9013

24.8573

23.7385

30

30

30

30

30

30

30

30

30

30

30

30

30

24.7484

30

30

30

30

30

30

30

30

30

30

30

30

30

30

30

30

30

30

30

30

30

30

30

30

30

30

25.9877

26.4205

30



23.3731

30

30

30

30

30

30

30

30

30

30

30

30

30

30

30

30

30

30

30

30

30

30

30

30

30

30

30

30

30

30

30

30

30

30

30

30

30

30

30

30

30

30

30

30

25.9737

30

30

30

30

30

30

30

30

30

30

30

30

30

30

30

30

30

30

30

30

30

30

21.1534

30

30

30

30

30

30

30

30

30

30

30

30

30

30

30

30

30

30

30

30

23.0379

30

30

30

30

30

30

30

25.2031

| sampleID | Group   | Areg_A01 | Areg_A13 | Ascl2_A25 | Ascl2_A37 |
|----------|---------|----------|----------|-----------|-----------|
| S01      | H2B-GFP | 30       | 30       | 30        | 30        |
| S02      | H2B-GFP | 30       | 30       | 30        | 30        |
| S03      | H2B-GFP | 30       | 30       | 30        | 30        |
| S04      | H2B-GFP | 30       | 30       | 30        | 30        |
| S05      | H2B-GFP | 30       | 30       | 30        | 30        |
| S06      | H2B-GFP | 30       | 30       | 30        | 30        |
| S07      | H2B-GFP | 30       | 30       | 30        | 30        |
| S08      | H2B-GFP | 30       | 30       | 30        | 30        |
| S09      | H2B-GFP | 30       | 30       | 30        | 30        |
| S10      | H2B-GFP | 30       | 30       | 30        | 30        |
| S11      | H2B-GFP | 30       | 30       | 30        | 30        |
| S12      | H2B-GFP | 30       | 30       | 30        | 30        |
| S13      | H2B-GFP | 30       | 19.3698  | 30        | 30        |
| S14      | H2B-GFP | 30       | 30       | 30        | 30        |
| S15      | H2B-GFP | 30       | 30       | 30        | 30        |
| S16      | H2B-GFP | 30       | 30       | 30        | 30        |
| S17      | H2B-GFP | 30       | 30       | 30        | 30        |
| S18      | H2B-GFP | 30       | 30       | 30        | 30        |
| S19      | H2B-GFP | 30       | 30       | 30        | 30        |
| S20      | H2B-GFP | 30       | 30       | 30        | 30        |
| S21      | H2B-GFP | 30       | 30       | 20.873    | 30        |
| S22      | H2B-GFP | 30       | 30       | 30        | 30        |
| S23      | H2B-GFP | 30       | 30       | 30        | 30        |
| S24      | H2B-GFP | 30       | 30       | 30        | 30        |
| S25      | H2B-GFP | 30       | 30       | 30        | 30        |
| S26      | H2B-GFP | 30       | 30       | 30        | 23.948    |
| S27      | H2B-GFP | 30       | 30       | 30        | 30        |
| S28      | H2B-GFP | 30       | 30       | 30        | 30        |
| S29      | H2B-GFP | 30       | 30       | 30        | 30        |
| S30      | H2B-GFP | 30       | 30       | 30        | 30        |
| S31      | H2B-GFP | 30       | 30       | 30        | 30        |
| S32      | H2B-GFP | 30       | 30       | 30        | 30        |
| S33      | H2B-GFP | 30       | 30       | 30        | 30        |
| S34      | H2B-GFP | 30       | 30       | 30        | 30        |
| S35      | H2B-GFP | 30       | 30       | 30        | 30        |
| S36      | H2B-GFP | 30       | 30       | 30        | 30        |
| S37      | H2B-GFP | 30       | 30       | 30        | 30        |
| S38      | H2B-GFP | 30       | 30       | 30        | 30        |
| S39      | H2B-GFP | 30       | 24.1094  | 30        | 30        |
| S40      | H2B-GFP | 30       | 30       | 20.0737   | 30        |

|     |         |         |         |         |    |
|-----|---------|---------|---------|---------|----|
| S41 | H2B-GFP | 30      | 30      | 30      | 30 |
| S42 | H2B-GFP | 30      | 30      | 30      | 30 |
| S43 | H2B-GFP | 30      | 30      | 30      | 30 |
| S44 | H2B-GFP | 30      | 30      | 30      | 30 |
| S45 | H2B-GFP | 30      | 30      | 30      | 30 |
| S46 | H2B-GFP | 30      | 30      | 30      | 30 |
| S47 | H2B-GFP | 30      | 30      | 30      | 30 |
| S48 | H2B-GFP | 30      | 30      | 30      | 30 |
| S49 | H2B-GFP | 30      | 30      | 30      | 30 |
| S50 | H2B-GFP | 30      | 30      | 30      | 30 |
| S51 | H2B-GFP | 30      | 17.228  | 30      | 30 |
| S52 | H2B-GFP | 30      | 21.4177 | 30      | 30 |
| S53 | H2B-GFP | 30      | 30      | 30      | 30 |
| S54 | H2B-GFP | 30      | 30      | 30      | 30 |
| S55 | H2B-GFP | 30      | 30      | 22.0969 | 30 |
| S56 | H2B-GFP | 30      | 30      | 30      | 30 |
| S57 | H2B-GFP | 30      | 30      | 30      | 30 |
| S58 | H2B-GFP | 30      | 30      | 30      | 30 |
| S59 | H2B-GFP | 30      | 30      | 19.4168 | 30 |
| S60 | H2B-GFP | 30      | 30      | 30      | 30 |
| S61 | H2B-GFP | 30      | 30      | 30      | 30 |
| S62 | H2B-GFP | 30      | 30      | 30      | 30 |
| S63 | H2B-GFP | 30      | 30      | 30      | 30 |
| S64 | H2B-GFP | 30      | 30      | 18.794  | 30 |
| S65 | H2B-GFP | 30      | 30      | 30      | 30 |
| S66 | H2B-GFP | 30      | 30      | 30      | 30 |
| S67 | H2B-GFP | 30      | 30      | 30      | 30 |
| S68 | H2B-GFP | 30      | 16.876  | 30      | 30 |
| S69 | H2B-GFP | 30      | 19.1546 | 30      | 30 |
| S70 | H2B-GFP | 30      | 30      | 30      | 30 |
| S71 | H2B-GFP | 30      | 30      | 30      | 30 |
| S72 | H2B-GFP | 30      | 30      | 30      | 30 |
| S73 | H2B-GFP | 27.8221 | 17.6176 | 30      | 30 |
| S74 | H2B-GFP | 30      | 30      | 30      | 30 |
| S75 | H2B-GFP | 30      | 30      | 30      | 30 |
| S76 | H2B-GFP | 30      | 30      | 30      | 30 |
| S77 | H2B-GFP | 30      | 30      | 30      | 30 |
| S78 | H2B-GFP | 30      | 30      | 30      | 30 |
| S79 | H2B-GFP | 30      | 30      | 19.5105 | 30 |
| S80 | H2B-GFP | 30      | 30      | 17.247  | 30 |
| S81 | H2B-GFP | 30      | 30      | 30      | 30 |

|     |         |    |    |    |    |
|-----|---------|----|----|----|----|
| S82 | H2B-GFP | 30 | 30 | 30 | 30 |
| S83 | H2B-GFP | 30 | 30 | 30 | 30 |
| S84 | H2B-GFP | 30 | 30 | 30 | 30 |
| S85 | H2B-GFP | 30 | 30 | 30 | 30 |
| S86 | H2B-GFP | 30 | 30 | 30 | 30 |
| S87 | H2B-GFP | 30 | 30 | 30 | 30 |
| S88 | H2B-GFP | 30 | 30 | 30 | 30 |
| S89 | H2B-GFP | 30 | 30 | 30 | 30 |
| S90 | H2B-GFP | 30 | 30 | 30 | 30 |
| S91 | H2B-GFP | 30 | 30 | 30 | 30 |

| Atoh1_A49 | Atoh1_A61 | Axin2_A73 | Axin2_A85 | Bmi1_A02 | Bmi1_A14 | Bmpr1a_A26 |
|-----------|-----------|-----------|-----------|----------|----------|------------|
| 12.7469   | 13.9864   | 30        | 17.6695   | 14.1059  | 14.594   | 30         |
| 16.7926   | 13.9834   | 16.2927   | 20.2498   | 30       | 21.6054  | 18.7826    |
| 14.6982   | 18.0303   | 30        | 30        | 13.9869  | 15.8119  | 17.1174    |
| 15.2166   | 15.3798   | 17.4549   | 21.959    | 15.633   | 15.8666  | 15.0991    |
| 12.1369   | 13.7928   | 30        | 30        | 16.0444  | 19.0297  | 15.5339    |
| 13.0297   | 14.3119   | 30        | 30        | 30       | 30       | 15.0911    |
| 11.4358   | 13.9884   | 30        | 30        | 14.2546  | 13.2872  | 13.3482    |
| 12.4666   | 14.9134   | 18.9854   | 18.2105   | 15.8045  | 15.0465  | 15.5009    |
| 14.6571   | 14.3994   | 30        | 30        | 30       | 18.6623  | 15.2139    |
| 13.2863   | 15.4512   | 30        | 30        | 15.2259  | 15.3506  | 16.423     |
| 16.9326   | 15.3985   | 15.5616   | 16.4981   | 15.0588  | 15.8692  | 15.5273    |
| 14.7761   | 14.8888   | 30        | 30        | 14.7654  | 18.3678  | 15.0152    |
| 13.5444   | 14.4194   | 30        | 30        | 14.1391  | 19.3274  | 17.6702    |
| 13.6463   | 15.3535   | 30        | 30        | 18.0334  | 15.9025  | 14.5607    |
| 16.8253   | 16.0709   | 30        | 30        | 20.9517  | 17.3533  | 15.5448    |
| 13.557    | 13.3394   | 15.7461   | 30        | 14.3973  | 15.0085  | 14.9288    |
| 13.4499   | 13.9498   | 14.7108   | 17.5122   | 14.9742  | 13.7241  | 14.6132    |
| 13.3786   | 17.0157   | 30        | 30        | 16.2641  | 19.7418  | 16.8763    |
| 12.606    | 19.3202   | 15.9837   | 15.7891   | 14.4046  | 15.4984  | 13.067     |
| 14.3081   | 15.58     | 30        | 30        | 16.8749  | 16.8831  | 30         |
| 13.4212   | 14.9584   | 15.9466   | 21.0727   | 30       | 18.005   | 16.108     |
| 11.9248   | 13.122    | 16.7067   | 17.62     | 15.1083  | 16.1196  | 15.2799    |
| 14.7084   | 14.3029   | 15.158    | 17.3034   | 16.7843  | 15.4748  | 13.349     |
| 14.2658   | 15.0574   | 30        | 30        | 15.985   | 16.367   | 30         |
| 30        | 30        | 30        | 30        | 30       | 30       | 30         |
| 14.3648   | 14.7697   | 30        | 30        | 16.3267  | 18.4504  | 16.7653    |
| 14.2074   | 14.8463   | 30        | 18.756    | 30       | 15.921   | 30         |
| 30        | 30        | 30        | 30        | 30       | 30       | 30         |
| 30        | 17.9488   | 16.3783   | 30        | 17.434   | 16.2362  | 30         |
| 14.1382   | 16.4784   | 30        | 30        | 16.3735  | 15.629   | 13.8158    |
| 15.3784   | 15.2822   | 16.6964   | 17.451    | 30       | 15.9924  | 14.7442    |
| 11.104    | 12.2992   | 30        | 30        | 14.9502  | 15.1089  | 14.3234    |
| 12.4158   | 14.0679   | 16.2736   | 19.4718   | 15.4662  | 15.2416  | 15.9737    |
| 12.9028   | 13.3442   | 30        | 16.5596   | 15.3191  | 17.4512  | 13.9632    |
| 15.2528   | 17.0068   | 30        | 17.9996   | 14.6738  | 15.2497  | 15.7834    |
| 12.9123   | 14.6006   | 23.0252   | 30        | 15.7687  | 16.0301  | 17.2244    |
| 13.1724   | 14.4287   | 16.1628   | 18.6626   | 15.3715  | 16.3351  | 30         |
| 14.6219   | 16.8085   | 16.4877   | 17.1527   | 18.1983  | 14.6795  | 15.6728    |
| 13.1195   | 13.2374   | 16.189    | 30        | 16.002   | 14.847   | 14.9355    |
| 14.9816   | 15.4314   | 15.9966   | 21.2426   | 15.0648  | 20.0519  | 30         |

|         |         |         |         |         |         |         |
|---------|---------|---------|---------|---------|---------|---------|
| 13.7875 | 14.19   | 30      | 30      | 16.6657 | 14.0675 | 14.1602 |
| 13.9094 | 16.8781 | 19.86   | 30      | 17.5786 | 13.6152 | 15.657  |
| 13.8448 | 14.1576 | 15.8623 | 30      | 14.8263 | 15.5763 | 14.9271 |
| 13.6055 | 15.9702 | 30      | 30      | 13.8768 | 14.9832 | 30      |
| 12.3742 | 14.3321 | 16.9641 | 19.5442 | 14.2324 | 14.1999 | 13.0972 |
| 12.4512 | 14.4107 | 18.7697 | 18.6705 | 14.5163 | 15.602  | 14.3159 |
| 14.5934 | 15.3628 | 16.0415 | 18.9146 | 14.0766 | 12.9424 | 13.1498 |
| 12.3431 | 13.0048 | 30      | 30      | 15.3236 | 16.1682 | 14.7146 |
| 16.3049 | 15.6654 | 30      | 30      | 14.9184 | 13.4288 | 16.5578 |
| 17.2465 | 18.636  | 30      | 30      | 14.154  | 15.1932 | 15.0929 |
| 15.1577 | 15.8703 | 16.6025 | 22.7003 | 13.8814 | 14.0854 | 15.5914 |
| 12.8394 | 13.8014 | 30      | 30      | 15.143  | 16.6001 | 15.6797 |
| 12.3147 | 14.4883 | 30      | 30      | 15.4573 | 16.0626 | 30      |
| 13.6289 | 15.2532 | 30      | 30      | 15.1839 | 17.2749 | 16.1549 |
| 14.7157 | 16.4667 | 30      | 30      | 23.1491 | 14.8783 | 14.3771 |
| 11.4959 | 12.8604 | 17.6741 | 19.5177 | 14.41   | 19.2935 | 16.3688 |
| 13.5151 | 14.208  | 16.9087 | 18.7398 | 13.3423 | 12.4962 | 30      |
| 14.5098 | 15.1652 | 15.2446 | 18.5166 | 16.0049 | 15.2386 | 30      |
| 14.6908 | 15.6837 | 30      | 16.7447 | 15.5271 | 15.2985 | 16.1195 |
| 13.8293 | 18.5231 | 17.6743 | 30      | 17.3421 | 15.7726 | 15.2599 |
| 13.028  | 15.2453 | 16.9494 | 30      | 15.4748 | 15.271  | 15.9928 |
| 12.8409 | 14.3965 | 30      | 16.1881 | 16.6975 | 15.5953 | 15.0134 |
| 14.0961 | 15.5259 | 14.0764 | 17.2552 | 16.0853 | 14.0604 | 30      |
| 11.911  | 13.9895 | 30      | 30      | 15.5419 | 18.2713 | 14.5416 |
| 14.909  | 17.2976 | 30      | 22.6447 | 14.8255 | 14.2802 | 30      |
| 14.1033 | 15.2462 | 30      | 30      | 15.6735 | 15.3541 | 30      |
| 14.7358 | 13.4192 | 30      | 30      | 15.992  | 16.3682 | 22.6815 |
| 15.5202 | 15.224  | 30      | 30      | 14.4887 | 16.6553 | 17.0265 |
| 14.4805 | 14.6986 | 18.3997 | 21.7792 | 16.2015 | 15.1362 | 14.5491 |
| 12.5846 | 14.8306 | 17.44   | 30      | 20.75   | 17.5644 | 16.8822 |
| 14.5042 | 15.8116 | 15.2035 | 30      | 18.6819 | 15.2893 | 18.019  |
| 14.5161 | 13.9744 | 15.9998 | 18.4384 | 16.081  | 17.742  | 15.2566 |
| 14.1783 | 16.0348 | 17.3394 | 17.1527 | 18.6306 | 30      | 13.8989 |
| 13.3472 | 14.5954 | 16.0763 | 30      | 18.7326 | 22.9899 | 16.4348 |
| 13.5635 | 13.6752 | 17.0753 | 17.4764 | 14.3158 | 14.1448 | 14.3923 |
| 24.2458 | 30      | 30      | 30      | 30      | 30      | 30      |
| 12.434  | 12.3544 | 17.5259 | 30      | 14.9153 | 12.6914 | 30      |
| 13.2757 | 14.8994 | 17.5261 | 18.433  | 15.9912 | 15.2793 | 14.1446 |
| 16.1793 | 16.2758 | 19.7684 | 30      | 15.3603 | 16.0087 | 16.3424 |
| 12.7482 | 15.4284 | 12.2594 | 14.8202 | 14.7639 | 15.4168 | 13.0369 |
| 13.4086 | 15.125  | 19.0853 | 30      | 15.3508 | 15.4625 | 14.3299 |

|         |         |         |         |         |         |         |
|---------|---------|---------|---------|---------|---------|---------|
| 13.6631 | 15.5125 | 18.6596 | 30      | 15.5844 | 14.6386 | 17.6352 |
| 16.3385 | 16.7741 | 30      | 30      | 14.5464 | 16.846  | 30      |
| 30      | 30      | 30      | 30      | 14.5828 | 18.216  | 15.9667 |
| 12.9702 | 14.6987 | 30      | 30      | 14.673  | 18.1731 | 14.6382 |
| 14.0903 | 15.1225 | 30      | 30      | 15.1844 | 14.646  | 17.2435 |
| 16.1246 | 19.1576 | 30      | 30      | 16.5288 | 15.3318 | 13.7384 |
| 12.6465 | 15.6803 | 30      | 18.6632 | 30      | 15.9524 | 30      |
| 11.5123 | 12.1519 | 23.6231 | 30      | 15.193  | 12.736  | 15.1026 |
| 15.4448 | 15.5062 | 30      | 21.5774 | 16.767  | 15.3479 | 16.4343 |
| 14.1525 | 15.2526 | 17.2282 | 20.4217 | 16.0265 | 15.5227 | 15.3887 |



| Bmpr1a_A38 | Ccnd1_A50 | Ccnd1_A62 | Cdkn1a_A74 | Cdkn1a_A86 | Cdx1_A03 | Cdx1_A15 |
|------------|-----------|-----------|------------|------------|----------|----------|
| 30         | 30        | 30        | 15.292     | 19.0873    | 30       | 27.44    |
| 14.9894    | 30        | 30        | 30         | 30         | 23.9299  | 24.1311  |
| 16.0954    | 30        | 30        | 14.6684    | 17.8874    | 30       | 21.323   |
| 14.3889    | 30        | 30        | 16.6497    | 30         | 30       | 21.0401  |
| 15.875     | 30        | 30        | 16.583     | 16.701     | 30       | 25.2728  |
| 14.4189    | 30        | 30        | 17.2423    | 16.5208    | 30       | 30       |
| 15.3152    | 30        | 30        | 11.5152    | 14.1016    | 30       | 30       |
| 14.9698    | 30        | 30        | 14.1821    | 16.1043    | 30       | 30       |
| 22.9796    | 30        | 30        | 23.5531    | 17.0567    | 30       | 25.1939  |
| 30         | 30        | 30        | 14.8432    | 18.5978    | 30       | 23.3779  |
| 30         | 30        | 30        | 16.548     | 18.9648    | 23.738   | 23.9269  |
| 15.585     | 30        | 30        | 13.7653    | 15.6024    | 30       | 30       |
| 17.1169    | 30        | 15.1054   | 12.4814    | 14.0836    | 23.6322  | 22.5996  |
| 15.6855    | 30        | 30        | 13.831     | 16.204     | 30       | 24.6389  |
| 16.1838    | 30        | 30        | 16.4962    | 19.2513    | 30       | 22.3442  |
| 30         | 30        | 30        | 16.5151    | 17.3627    | 30       | 21.8924  |
| 15.0177    | 30        | 30        | 13.4053    | 15.6087    | 20.7524  | 21.4655  |
| 30         | 30        | 30        | 16.2386    | 17.5472    | 30       | 22.5681  |
| 13.2763    | 30        | 30        | 13.7026    | 17.02      | 30       | 21.5026  |
| 30         | 30        | 30        | 16.7579    | 17.6672    | 30       | 30       |
| 16.7483    | 30        | 21.1063   | 15.1235    | 17.8225    | 30       | 30       |
| 16.9879    | 30        | 30        | 13.7441    | 17.4632    | 30       | 22.9198  |
| 14.9853    | 30        | 15.6254   | 14.7473    | 30         | 30       | 21.1982  |
| 14.8959    | 30        | 30        | 16.8197    | 17.0725    | 30       | 21.8568  |
| 30         | 30        | 30        | 30         | 30         | 30       | 30       |
| 30         | 30        | 19.2893   | 15.273     | 16.5545    | 30       | 21.4372  |
| 14.381     | 30        | 30        | 19.1241    | 20.56      | 30       | 30       |
| 30         | 30        | 30        | 30         | 30         | 30       | 30       |
| 16.4074    | 30        | 30        | 15.7827    | 16.3284    | 30       | 22.7897  |
| 13.8513    | 30        | 30        | 30         | 30         | 30       | 20.3141  |
| 18.5794    | 30        | 30        | 17.037     | 17.0378    | 23.3191  | 21.1657  |
| 15.8505    | 30        | 30        | 14.7709    | 17.1137    | 22.8557  | 21.2499  |
| 15.2726    | 30        | 30        | 15.253     | 15.7188    | 30       | 20.3938  |
| 16.3697    | 30        | 18.8473   | 12.118     | 14.3534    | 30       | 18.6621  |
| 15.3853    | 30        | 30        | 13.4785    | 16.2417    | 19.2019  | 19.9464  |
| 30         | 30        | 30        | 15.1785    | 17.1237    | 30       | 23.0674  |
| 16.6044    | 30        | 30        | 12.9254    | 15.3886    | 30       | 23.5495  |
| 30         | 30        | 30        | 15.1925    | 16.3521    | 19.7791  | 30       |
| 14.0503    | 30        | 30        | 14.4433    | 17.1375    | 22.3709  | 24.8697  |
| 16.2877    | 30        | 30        | 22.7217    | 30         | 23.638   | 18.5158  |

|         |         |         |         |         |         |         |
|---------|---------|---------|---------|---------|---------|---------|
| 13.6659 | 30      | 30      | 11.5222 | 13.7256 | 22.3445 | 18.4972 |
| 30      | 30      | 30      | 13.6287 | 15.8951 | 30      | 20.6303 |
| 14.3673 | 30      | 30      | 30      | 30      | 30      | 20.5064 |
| 14.9174 | 30      | 30      | 13.6853 | 16.9053 | 30      | 30      |
| 25.7968 | 30      | 30      | 14.0509 | 16.5198 | 22.826  | 30      |
| 13.615  | 30      | 30      | 13.2994 | 16.6726 | 22.2057 | 26.3642 |
| 14.2576 | 30      | 30      | 13.2721 | 14.8102 | 21.6996 | 30      |
| 14.3353 | 30      | 22.2981 | 11.9059 | 14.3126 | 24.3768 | 20.885  |
| 15.9052 | 30      | 30      | 16.0463 | 15.9651 | 23.966  | 25.7211 |
| 30      | 30      | 30      | 30      | 17.6355 | 30      | 30      |
| 14.5077 | 30      | 30      | 13.9925 | 18.1901 | 24.4234 | 30      |
| 16.3874 | 30      | 30      | 13.4422 | 16.4266 | 30      | 25.2461 |
| 15.5795 | 30      | 30      | 13.8512 | 16.4935 | 30      | 22.4498 |
| 30      | 17.3724 | 15.8549 | 14.0342 | 16.117  | 30      | 23.0989 |
| 16.9524 | 30      | 30      | 13.4699 | 17.7169 | 30      | 23.9961 |
| 16.2153 | 30      | 21.2718 | 15.793  | 17.0476 | 30      | 23.6311 |
| 30      | 30      | 30      | 15.2419 | 16.0296 | 22.7689 | 30      |
| 14.9593 | 30      | 30      | 17.5295 | 19.2049 | 30      | 23.366  |
| 16.3803 | 30      | 30      | 12.6476 | 14.614  | 30      | 20.9178 |
| 14.8293 | 30      | 30      | 15.715  | 17.307  | 30      | 26.4804 |
| 15.497  | 30      | 30      | 15.6144 | 17.0745 | 30      | 30      |
| 16.7742 | 30      | 30      | 14.0131 | 16.153  | 30      | 24.6427 |
| 16.414  | 30      | 30      | 12.9404 | 15.5119 | 30      | 30      |
| 16.5769 | 30      | 30      | 14.4439 | 15.1675 | 21.4053 | 22.2378 |
| 15.6928 | 30      | 30      | 23.3965 | 30      | 30      | 30      |
| 21.5131 | 30      | 30      | 15.323  | 17.6829 | 30      | 20.6944 |
| 30      | 30      | 30      | 14.9947 | 16.9637 | 30      | 26.7741 |
| 18.6095 | 30      | 30      | 13.8016 | 15.5459 | 19.6618 | 21.3627 |
| 16.9299 | 30      | 30      | 14.3357 | 16.6207 | 30      | 22.4656 |
| 15.4348 | 30      | 30      | 14.0609 | 16.8808 | 30      | 30      |
| 17.1111 | 30      | 30      | 14.062  | 19.3543 | 30      | 26.572  |
| 18.8103 | 30      | 30      | 12.8786 | 14.5519 | 30      | 20.4194 |
| 14.9938 | 30      | 30      | 14.9452 | 16.5873 | 30      | 20.6242 |
| 15.6979 | 30      | 30      | 14.4722 | 15.9806 | 30      | 19.8446 |
| 15.0486 | 30      | 23.3637 | 14.999  | 16.7158 | 30      | 22.4831 |
| 30      | 30      | 30      | 30      | 30      | 30      | 30      |
| 14.4731 | 30      | 30      | 13.5553 | 15.8897 | 30      | 25.2928 |
| 14.7395 | 19.9235 | 16.4778 | 15.7818 | 30      | 30      | 20.491  |
| 15.4791 | 30      | 30      | 13.4593 | 15.4397 | 30      | 26.5451 |
| 12.9037 | 30      | 30      | 11.9391 | 13.4448 | 21.3233 | 18.7493 |
| 14.4595 | 30      | 30      | 13.6754 | 15.4119 | 30      | 22.8584 |

|         |         |         |         |         |         |         |
|---------|---------|---------|---------|---------|---------|---------|
| 30      | 30      | 30      | 14.9742 | 16.9174 | 30      | 21.5871 |
| 23.2806 | 30      | 17.5863 | 19.0601 | 17.6197 | 20.4194 | 30      |
| 16.0432 | 30      | 19.8301 | 17.0803 | 19.2352 | 30      | 30      |
| 16.1929 | 30      | 30      | 16.6822 | 17.7978 | 30      | 25.6733 |
| 17.2759 | 30      | 30      | 24.5033 | 17.7886 | 30      | 30      |
| 16.7687 | 23.1291 | 16.8166 | 16.128  | 17.1141 | 24.4368 | 21.9525 |
| 15.6482 | 30      | 30      | 13.7306 | 14.846  | 30      | 25.5062 |
| 12.9118 | 30      | 30      | 10.8781 | 13.9083 | 30      | 30      |
| 15.1879 | 30      | 30      | 14.7344 | 19.313  | 30      | 28.4564 |
| 22.2519 | 30      | 30      | 19.8996 | 18.6931 | 18.3318 | 30      |

| Chga_A27 | Chga_A39 | Cre_A22 | Cubn_A51 | Cubn_A63 | Dll4_A75 | Dll4_A87 |
|----------|----------|---------|----------|----------|----------|----------|
| 30       | 30       | 30      | 30       | 30       | 16.2066  | 30       |
| 30       | 30       | 30      | 30       | 30       | 30       | 23.2884  |
| 30       | 30       | 30      | 30       | 30       | 30       | 30       |
| 30       | 30       | 30      | 30       | 30       | 15.4797  | 30       |
| 30       | 30       | 30      | 30       | 30       | 16.9997  | 30       |
| 30       | 30       | 30      | 27.5967  | 30       | 30       | 30       |
| 30       | 30       | 30      | 30       | 30       | 15.1462  | 30       |
| 30       | 30       | 30      | 30       | 30       | 30       | 30       |
| 30       | 30       | 30      | 30       | 30       | 30       | 30       |
| 30       | 30       | 30      | 30       | 30       | 30       | 30       |
| 30       | 30       | 30      | 30       | 30       | 19.5125  | 30       |
| 30       | 30       | 30      | 30       | 30       | 15.0328  | 19.7456  |
| 30       | 30       | 30      | 30       | 30       | 17.2778  | 30       |
| 30       | 30       | 30      | 30       | 30       | 18.2124  | 16.9704  |
| 30       | 30       | 30      | 30       | 30       | 30       | 30       |
| 30       | 30       | 30      | 30       | 30       | 16.0135  | 30       |
| 30       | 30       | 30      | 30       | 30       | 30       | 30       |
| 30       | 30       | 30      | 30       | 30       | 16.7057  | 18.8601  |
| 30       | 30       | 30      | 30       | 30       | 15.7729  | 17.545   |
| 30       | 30       | 30      | 30       | 30       | 30       | 30       |
| 30       | 30       | 30      | 30       | 30       | 30       | 30       |
| 30       | 30       | 30      | 30       | 30       | 15.4075  | 30       |
| 30       | 30       | 30      | 30       | 30       | 30       | 30       |
| 30       | 30       | 30      | 30       | 30       | 30       | 30       |
| 30       | 30       | 30      | 30       | 30       | 30       | 30       |
| 30       | 30       | 30      | 30       | 30       | 30       | 30       |
| 30       | 30       | 30      | 30       | 30       | 30       | 30       |
| 30       | 30       | 30      | 30       | 30       | 30       | 30       |
| 30       | 30       | 30      | 30       | 30       | 30       | 30       |
| 30       | 30       | 30      | 30       | 30       | 16.6261  | 30       |
| 30       | 30       | 30      | 30       | 30       | 30       | 30       |
| 30       | 30       | 30      | 30       | 30       | 30       | 30       |
| 30       | 30       | 30      | 30       | 30       | 30       | 30       |
| 30       | 30       | 30      | 30       | 30       | 17.1844  | 17.6339  |
| 30       | 30       | 30      | 30       | 30       | 14.7352  | 16.2801  |
| 30       | 30       | 30      | 30       | 30       | 30       | 21.4881  |
| 30       | 30       | 30      | 30       | 30       | 19.9222  | 30       |
| 30       | 30       | 30      | 30       | 30       | 30       | 30       |
| 30       | 30       | 30      | 30       | 30       | 16.9762  | 20.2409  |
| 30       | 30       | 30      | 30       | 30       | 15.9679  | 21.1309  |
| 30       | 30       | 30      | 30       | 30       | 14.7405  | 16.5414  |
| 30       | 30       | 30      | 30       | 30       | 30       | 30       |
| 30       | 30       | 30      | 30       | 24.5293  | 16.5462  | 30       |

|    |    |    |    |         |         |         |
|----|----|----|----|---------|---------|---------|
| 30 | 30 | 30 | 30 | 30      | 17.7724 | 30      |
| 30 | 30 | 30 | 30 | 30      | 14.8695 | 17.6364 |
| 30 | 30 | 30 | 30 | 30      | 30      | 30      |
| 30 | 30 | 30 | 30 | 30      | 30      | 30      |
| 30 | 30 | 30 | 30 | 30      | 30      | 30      |
| 30 | 30 | 30 | 30 | 30      | 16.5647 | 30      |
| 30 | 30 | 30 | 30 | 30      | 30      | 30      |
| 30 | 30 | 30 | 30 | 24.5102 | 15.92   | 18.764  |
| 30 | 30 | 30 | 30 | 30      | 30      | 16.5194 |
| 30 | 30 | 30 | 30 | 30      | 30      | 30      |
| 30 | 30 | 30 | 30 | 30      | 14.5883 | 16.5831 |
| 30 | 30 | 30 | 30 | 30      | 30      | 18.2275 |
| 30 | 30 | 30 | 30 | 30      | 17.6996 | 30      |
| 30 | 30 | 30 | 30 | 30      | 22.4342 | 18.2774 |
| 30 | 30 | 30 | 30 | 30      | 30      | 17.2628 |
| 30 | 30 | 30 | 30 | 30      | 16.3006 | 19.6509 |
| 30 | 30 | 30 | 30 | 22.5745 | 15.6964 | 22.1441 |
| 30 | 30 | 30 | 30 | 30      | 18.3367 | 30      |
| 30 | 30 | 30 | 30 | 30      | 22.0972 | 30      |
| 30 | 30 | 30 | 30 | 30      | 30      | 30      |
| 30 | 30 | 30 | 30 | 30      | 30      | 30      |
| 30 | 30 | 30 | 30 | 30      | 17.2863 | 30      |
| 30 | 30 | 30 | 30 | 30      | 30      | 16.862  |
| 30 | 30 | 30 | 30 | 30      | 15.7922 | 30      |
| 30 | 30 | 30 | 30 | 30      | 15.5401 | 20.6119 |
| 30 | 30 | 30 | 30 | 30      | 17.7534 | 19.8954 |
| 30 | 30 | 30 | 30 | 30      | 18.4178 | 30      |
| 30 | 30 | 30 | 30 | 30      | 15.7096 | 17.5338 |
| 30 | 30 | 30 | 30 | 30      | 16.4466 | 30      |
| 30 | 30 | 30 | 30 | 30      | 16.3735 | 21.6128 |
| 30 | 30 | 30 | 30 | 30      | 15.2303 | 30      |
| 30 | 30 | 30 | 30 | 30      | 15.8234 | 18.4187 |
| 30 | 30 | 30 | 30 | 30      | 15.0023 | 23.2513 |
| 30 | 30 | 30 | 30 | 30      | 30      | 30      |
| 30 | 30 | 30 | 30 | 30      | 17.2832 | 30      |
| 30 | 30 | 30 | 30 | 30      | 30      | 30      |
| 30 | 30 | 30 | 30 | 30      | 23.5857 | 30      |
| 30 | 30 | 30 | 30 | 30      | 30      | 30      |
| 30 | 30 | 30 | 30 | 30      | 16.2447 | 23.2919 |
| 30 | 30 | 30 | 30 | 30      | 15.4293 | 30      |
| 30 | 30 | 30 | 30 | 30      | 18.3743 | 30      |

|    |    |      |    |         |         |    |
|----|----|------|----|---------|---------|----|
| 30 | 30 | 30   | 30 | 30      | 16.4668 | 30 |
| 30 | 30 | 30   | 30 | 30      | 30      | 30 |
| 30 | 30 | 30   | 30 | 30      | 30      | 30 |
| 30 | 30 | 30   | 30 | 30      | 23.6245 | 30 |
| 30 | 30 | 30   | 30 | 23.6849 | 30      | 30 |
| 30 | 30 | 30   | 30 | 30      | 30      | 30 |
| 30 | 30 | 30   | 30 | 30      | 30      | 30 |
| 30 | 30 | 30   | 30 | 30      | 14.4871 | 30 |
| 30 | 30 | 26.5 | 30 | 30      | 16.6665 | 30 |
| 30 | 30 | 30   | 30 | 25.2583 | 16.2708 | 30 |

| Dvl2_A04 | Dvl2_A16 | Efnb1_A28 | Efnb1_A40 | Epas1_A52 | Epas1_A64 | Ephb2_A76 |
|----------|----------|-----------|-----------|-----------|-----------|-----------|
| 30       | 30       | 30        | 30        | 30        | 30        | 23.1616   |
| 30       | 30       | 30        | 30        | 30        | 30        | 17.9645   |
| 30       | 30       | 30        | 30        | 30        | 30        | 17.9987   |
| 30       | 30       | 23.4426   | 30        | 17.2172   | 30        | 18.1629   |
| 30       | 30       | 30        | 30        | 30        | 30        | 30        |
| 30       | 30       | 30        | 23.092    | 30        | 30        | 30        |
| 30       | 30       | 19.5938   | 17.4104   | 17.0844   | 16.4038   | 30        |
| 30       | 30       | 19.379    | 30        | 16.5932   | 30        | 21.8165   |
| 30       | 16.0092  | 30        | 30        | 30        | 30        | 17.2801   |
| 30       | 30       | 30        | 22.7398   | 16.9307   | 30        | 17.7281   |
| 30       | 16.2533  | 30        | 30        | 16.3307   | 30        | 21.1004   |
| 30       | 30       | 30        | 19.6405   | 30        | 30        | 18.0999   |
| 30       | 30       | 16.5718   | 30        | 20.0512   | 30        | 15.7951   |
| 30       | 17.47    | 18.5819   | 30        | 17.6592   | 30        | 20.1314   |
| 21.2987  | 30       | 30        | 30        | 30        | 30        | 17.3562   |
| 30       | 30       | 30        | 30        | 15.0368   | 30        | 15.2174   |
| 15.9566  | 30       | 30        | 30        | 30        | 24.1637   | 26.0017   |
| 30       | 24.8212  | 17.0683   | 30        | 23.3006   | 30        | 19.0421   |
| 30       | 30       | 30        | 19.4696   | 30        | 30        | 23.1357   |
| 30       | 30       | 30        | 30        | 30        | 30        | 16.6594   |
| 30       | 30       | 30        | 30        | 30        | 30        | 16.3891   |
| 18.2273  | 30       | 20.3778   | 30        | 20.8124   | 30        | 16.2604   |
| 30       | 15.3365  | 30        | 30        | 30        | 23.3736   | 15.8191   |
| 30       | 30       | 30        | 30        | 30        | 30        | 16.8187   |
| 30       | 30       | 30        | 30        | 30        | 30        | 22.4908   |
| 30       | 30       | 30        | 19.5947   | 30        | 24.014    | 17.4234   |
| 30       | 30       | 30        | 30        | 30        | 30        | 15.9649   |
| 30       | 30       | 30        | 30        | 30        | 30        | 23.8062   |
| 16.2276  | 15.0696  | 30        | 30        | 30        | 30        | 16.5284   |
| 30       | 30       | 30        | 30        | 16.3511   | 17.6231   | 17.7124   |
| 30       | 30       | 30        | 30        | 30        | 30        | 15.7245   |
| 30       | 30       | 17.7679   | 18.7013   | 21.2916   | 30        | 20.0702   |
| 30       | 30       | 30        | 30        | 30        | 30        | 15.8785   |
| 30       | 22.8656  | 20.1774   | 18.3587   | 18.0844   | 16.9169   | 15.0041   |
| 30       | 30       | 30        | 30        | 30        | 16.7728   | 15.2357   |
| 30       | 30       | 30        | 17.9088   | 30        | 21.712    | 20.2394   |
| 30       | 30       | 30        | 21.2371   | 18.9286   | 30        | 16.684    |
| 17.4458  | 30       | 30        | 30        | 30        | 30        | 14.4398   |
| 30       | 30       | 23.483    | 18.7355   | 19.952    | 30        | 16.1684   |
| 30       | 30       | 30        | 17.8074   | 23.2317   | 30        | 20.8539   |

|         |         |         |         |         |         |         |
|---------|---------|---------|---------|---------|---------|---------|
| 16.7062 | 30      | 16.1024 | 21.1073 | 30      | 30      | 18.6525 |
| 30      | 30      | 30      | 30      | 15.866  | 30      | 30      |
| 30      | 30      | 30      | 30      | 20.6409 | 30      | 15.4603 |
| 30      | 30      | 30      | 30      | 30      | 30      | 19.3066 |
| 30      | 30      | 30      | 30      | 19.6464 | 30      | 15.0185 |
| 19.1288 | 30      | 30      | 20.5946 | 30      | 30      | 20.1933 |
| 15.9292 | 23.5484 | 30      | 30      | 30      | 30      | 18.3212 |
| 30      | 30      | 18.4644 | 20.3707 | 16.5525 | 30      | 18.6083 |
| 30      | 30      | 30      | 30      | 30      | 30      | 19.4247 |
| 16.7632 | 16.3185 | 16.7007 | 16.1712 | 30      | 30      | 18.7845 |
| 30      | 30      | 18.7498 | 22.9072 | 30      | 30      | 14.3933 |
| 30      | 30      | 30      | 30      | 30      | 30      | 14.8313 |
| 30      | 30      | 30      | 30      | 18.7759 | 30      | 18.1969 |
| 30      | 30      | 22.5055 | 30      | 19.6234 | 15.5955 | 18.4828 |
| 30      | 22.066  | 23.2798 | 22.1552 | 22.321  | 30      | 20.9725 |
| 21.983  | 30      | 30      | 15.1277 | 17.429  | 30      | 22.1675 |
| 30      | 24.3184 | 30      | 21.5127 | 30      | 30      | 16.4379 |
| 30      | 30      | 19.1201 | 18.9064 | 30      | 20.4286 | 16.3763 |
| 30      | 30      | 20.8252 | 30      | 16.4806 | 30      | 21.0228 |
| 30      | 30      | 30      | 30      | 18.7363 | 16.5219 | 15.1725 |
| 30      | 30      | 30      | 30      | 30      | 18.0197 | 16.4423 |
| 30      | 30      | 30      | 22.1386 | 30      | 30      | 15.6667 |
| 21.1452 | 30      | 30      | 30      | 30      | 30      | 18.6229 |
| 30      | 30      | 30      | 30      | 30      | 30      | 21.9834 |
| 30      | 30      | 30      | 30      | 30      | 30      | 21.6843 |
| 30      | 30      | 18.9107 | 21.5884 | 30      | 30      | 16.4145 |
| 16.8073 | 30      | 18.068  | 30      | 30      | 30      | 21.9757 |
| 30      | 30      | 30      | 18.777  | 30      | 30      | 17.2161 |
| 30      | 30      | 30      | 18.0982 | 30      | 30      | 15.9615 |
| 30      | 30      | 30      | 30      | 30      | 30      | 14.2447 |
| 30      | 20.0075 | 30      | 30      | 17.1146 | 30      | 17.1907 |
| 30      | 30      | 23.5003 | 30      | 30      | 17.8766 | 14.9904 |
| 17.7019 | 30      | 30      | 19.8228 | 30      | 22.8389 | 16.4305 |
| 18.1459 | 30      | 30      | 30      | 30      | 18.56   | 21.5806 |
| 30      | 30      | 30      | 30      | 17.2158 | 30      | 22.9543 |
| 30      | 30      | 30      | 30      | 30      | 30      | 17.6977 |
| 30      | 22.6505 | 23.6222 | 30      | 30      | 30      | 15.6076 |
| 30      | 30      | 22.5202 | 30      | 18.1544 | 30      | 16.6211 |
| 17.644  | 30      | 30      | 30      | 17.0835 | 23.1083 | 17.3081 |
| 30      | 30      | 16.4136 | 18.8474 | 30      | 23.4805 | 14.3095 |
| 30      | 20.6689 | 30      | 20.0948 | 30      | 30      | 16.6884 |



|    |         |         |         |         |         |         |
|----|---------|---------|---------|---------|---------|---------|
| 30 | 30      | 30      | 18.8302 | 30      | 30      | 22.5976 |
| 30 | 30      | 30      | 20.3576 | 19.418  | 30      | 19.2477 |
| 30 | 30      | 30      | 22.9535 | 16.3047 | 30      | 21.1147 |
| 30 | 30      | 30      | 30      | 19.5485 | 30      | 16.7015 |
| 30 | 30      | 30      | 30      | 17.9711 | 15.7485 | 24.0647 |
| 30 | 30      | 30      | 18.3185 | 18.7562 | 18.2569 | 16.5048 |
| 30 | 30      | 30      | 30      | 30      | 30      | 17.8943 |
| 30 | 16.2459 | 16.9194 | 20.2436 | 17.9856 | 24.4674 | 15.4927 |
| 30 | 30      | 16.653  | 17.3893 | 30      | 30      | 20.8694 |
| 30 | 30      | 19.2154 | 30      | 30      | 30      | 23.162  |

| Ephb2_A88 | Ereg_A05 | Ereg_A17 | Fut2_A29 | Fut2_A41 | Gapdh_A53 | Gapdh_A65 |
|-----------|----------|----------|----------|----------|-----------|-----------|
| 20.6571   | 30       | 30       | 30       | 30       | 12.4456   | 12.4021   |
| 30        | 30       | 30       | 30       | 17.0941  | 12.4683   | 12.3899   |
| 30        | 30       | 30       | 30       | 16.9935  | 11.5049   | 11.5421   |
| 22.2631   | 30       | 30       | 30       | 30       | 12.1983   | 12.2778   |
| 18.578    | 30       | 30       | 30       | 15.8267  | 13.4635   | 13.5026   |
| 19.798    | 30       | 30       | 30       | 30       | 11.9501   | 11.9667   |
| 16.8823   | 30       | 30       | 17.215   | 15.0503  | 11.7502   | 11.7273   |
| 18.7741   | 30       | 30       | 30       | 30       | 11.6198   | 11.5854   |
| 30        | 30       | 30       | 30       | 30       | 12.253    | 12.3361   |
| 16.7912   | 30       | 30       | 30       | 15.6488  | 12.3596   | 12.4017   |
| 16.9743   | 30       | 30       | 30       | 17.7015  | 12.237    | 12.3388   |
| 30        | 30       | 30       | 30       | 16.0102  | 11.1115   | 11.1507   |
| 30        | 30       | 30       | 30       | 30       | 11.8124   | 11.8564   |
| 30        | 30       | 30       | 30       | 17.4312  | 12.1081   | 12.1469   |
| 30        | 30       | 30       | 30       | 30       | 12.5629   | 12.6562   |
| 30        | 30       | 30       | 17.6337  | 18.1296  | 11.3719   | 11.3635   |
| 30        | 30       | 30       | 30       | 18.019   | 11.2739   | 11.3874   |
| 21.5315   | 30       | 30       | 30       | 30       | 13.0572   | 13.1049   |
| 16.11     | 30       | 30       | 30       | 16.1709  | 10.9957   | 10.9569   |
| 17.8358   | 30       | 30       | 30       | 30       | 12.8247   | 12.7675   |
| 30        | 30       | 30       | 22.5928  | 30       | 12.2358   | 12.3315   |
| 30        | 30       | 30       | 30       | 17.1642  | 11.9163   | 11.8222   |
| 17.7718   | 30       | 30       | 30       | 30       | 12.7305   | 12.7354   |
| 30        | 30       | 30       | 30       | 30       | 12.4821   | 12.4469   |
| 30        | 30       | 30       | 30       | 30       | 30        | 30        |
| 30        | 30       | 30       | 19.295   | 18.7585  | 12.6771   | 12.5809   |
| 18.7023   | 30       | 30       | 30       | 18.1017  | 11.9251   | 11.9335   |
| 30        | 30       | 30       | 30       | 30       | 30        | 30        |
| 30        | 30       | 30       | 30       | 17.2254  | 11.7495   | 11.6841   |
| 30        | 30       | 30       | 30       | 17.847   | 11.6205   | 11.4964   |
| 30        | 30       | 30       | 30       | 30       | 11.9455   | 11.8556   |
| 30        | 30       | 30       | 30       | 18.3221  | 11.4106   | 11.4701   |
| 30        | 30       | 30       | 30       | 30       | 12.1414   | 12.1567   |
| 16.3331   | 30       | 30       | 17.8918  | 17.2843  | 10.7797   | 10.7985   |
| 17.632    | 30       | 30       | 30       | 30       | 13.7743   | 13.8488   |
| 30        | 30       | 30       | 30       | 30       | 12.1147   | 12.0735   |
| 30        | 30       | 30       | 30       | 16.6695  | 11.3336   | 11.3342   |
| 17.511    | 30       | 30       | 30       | 30       | 12.3282   | 12.1846   |
| 30        | 30       | 30       | 30       | 30       | 11.2145   | 11.2393   |
| 22.2376   | 30       | 30       | 30       | 19.6659  | 11.2749   | 11.263    |

|         |         |    |         |         |         |         |
|---------|---------|----|---------|---------|---------|---------|
| 30      | 30      | 30 | 30      | 17.8379 | 10.5855 | 10.5113 |
| 30      | 30      | 30 | 30      | 15.1943 | 10.7997 | 10.7412 |
| 30      | 30      | 30 | 30      | 30      | 12.0351 | 12.0181 |
| 17.6851 | 30      | 30 | 30      | 16.1323 | 11.2183 | 11.2777 |
| 19.0246 | 30      | 30 | 30      | 30      | 10.6659 | 10.6504 |
| 30      | 30      | 30 | 30      | 17.1893 | 11.1098 | 11.2495 |
| 19.5314 | 30      | 30 | 30      | 19.7862 | 10.9115 | 10.9224 |
| 17.8777 | 30      | 30 | 19.2476 | 14.9957 | 11.7776 | 11.8784 |
| 30      | 30      | 30 | 30      | 18.466  | 11.5002 | 11.592  |
| 18.8824 | 30      | 30 | 30      | 15.5449 | 9.15201 | 9.40416 |
| 16.0022 | 30      | 30 | 30      | 21.1524 | 11.5076 | 11.572  |
| 21.2457 | 30      | 30 | 30      | 18.0783 | 11.3593 | 11.3747 |
| 17.1082 | 30      | 30 | 30      | 30      | 12.5325 | 12.5986 |
| 17.5496 | 30      | 30 | 30      | 16.5643 | 12.001  | 12.0092 |
| 30      | 30      | 30 | 30      | 17.7062 | 11.5312 | 11.6687 |
| 17.9759 | 30      | 30 | 18.0765 | 15.2534 | 11.4039 | 11.372  |
| 25.2181 | 30      | 30 | 30      | 22.1733 | 11.6704 | 11.7622 |
| 17.2371 | 30      | 30 | 30      | 22.6757 | 12.0943 | 12.0946 |
| 17.7192 | 24.2203 | 30 | 30      | 18.2607 | 11.5241 | 11.5646 |
| 30      | 30      | 30 | 30      | 30      | 13.2201 | 13.1601 |
| 19.5632 | 30      | 30 | 30      | 17.8152 | 12.0644 | 12.1207 |
| 18.6039 | 30      | 30 | 30      | 15.7783 | 11.2981 | 11.3683 |
| 30      | 30      | 30 | 30      | 19.3091 | 11.8555 | 11.6668 |
| 16.3203 | 30      | 30 | 30      | 17.8382 | 11.9294 | 11.8423 |
| 20.1177 | 30      | 30 | 30      | 30      | 12.1693 | 12.3211 |
| 18.4887 | 30      | 30 | 30      | 30      | 12.0898 | 12.0844 |
| 30      | 30      | 30 | 30      | 17.6053 | 11.2881 | 11.3116 |
| 30      | 30      | 30 | 30      | 19.7322 | 11.9283 | 11.9558 |
| 18.5672 | 30      | 30 | 30      | 17.5611 | 11.9428 | 11.9514 |
| 20.5617 | 30      | 30 | 30      | 30      | 12.574  | 12.4639 |
| 23.5298 | 30      | 30 | 30      | 30      | 12.1498 | 12.0629 |
| 18.2661 | 30      | 30 | 30      | 18.7911 | 11.4533 | 11.4636 |
| 30      | 30      | 30 | 30      | 16.223  | 12.064  | 11.9867 |
| 30      | 30      | 30 | 30      | 17.0461 | 12.168  | 12.2016 |
| 17.2196 | 30      | 30 | 30      | 16.398  | 11.6688 | 11.7523 |
| 30      | 30      | 30 | 30      | 30      | 30      | 30      |
| 23.2248 | 30      | 30 | 30      | 30      | 11.6478 | 11.5425 |
| 30      | 30      | 30 | 30      | 23.5036 | 12.2239 | 12.2084 |
| 30      | 30      | 30 | 30      | 30      | 12.4663 | 12.5332 |
| 14.0434 | 30      | 30 | 30      | 15.9071 | 9.98521 | 10.0651 |
| 16.7966 | 30      | 30 | 30      | 30      | 11.3067 | 11.3519 |

|         |    |    |    |         |         |         |
|---------|----|----|----|---------|---------|---------|
| 16.7511 | 30 | 30 | 30 | 30      | 11.837  | 11.9185 |
| 30      | 30 | 30 | 30 | 30      | 11.8887 | 11.9959 |
| 30      | 30 | 30 | 30 | 16.1709 | 11.7363 | 11.6173 |
| 30      | 30 | 30 | 30 | 15.7296 | 11.3564 | 11.3976 |
| 30      | 30 | 30 | 30 | 16.6307 | 10.4466 | 10.4474 |
| 18.7551 | 30 | 30 | 30 | 15.5267 | 10.1256 | 10.0801 |
| 30      | 30 | 30 | 30 | 16.8731 | 11.3851 | 11.4982 |
| 30      | 30 | 30 | 30 | 14.1354 | 11.0784 | 11.0796 |
| 30      | 30 | 30 | 30 | 21.2299 | 12.2334 | 12.1309 |
| 18.3092 | 30 | 30 | 30 | 30      | 13.2212 | 13.2537 |

| Gsk3b_A77 | Gsk3b_A89 | Gusb_A06 | Gusb_A18 | H6pd_A30 | H6pd_A42 | Hes1_A54 |
|-----------|-----------|----------|----------|----------|----------|----------|
| 16.9418   | 15.3552   | 30       | 15.8557  | 30       | 24.0661  | 30       |
| 30        | 16.6753   | 19.3339  | 30       | 30       | 20.8321  | 17.3632  |
| 30        | 15.3      | 15.7411  | 22.4192  | 30       | 30       | 17.8388  |
| 17.6054   | 16.0215   | 16.1847  | 30       | 30       | 30       | 30       |
| 30        | 14.3766   | 15.9752  | 18.913   | 17.7869  | 18.4714  | 30       |
| 18.2446   | 17.3136   | 17.1214  | 30       | 30       | 30       | 21.1786  |
| 14.4613   | 14.3142   | 16.5803  | 30       | 30       | 21.2364  | 18.1953  |
| 30        | 30        | 17.5725  | 16.8368  | 30       | 30       | 30       |
| 30        | 30        | 30       | 23.3723  | 18.9134  | 30       | 18.8729  |
| 15.7613   | 14.3228   | 15.6043  | 30       | 30       | 30       | 30       |
| 17.3548   | 14.7019   | 15.7337  | 30       | 30       | 24.4494  | 30       |
| 17.9028   | 17.7929   | 30       | 16.5795  | 30       | 30       | 22.9713  |
| 17.991    | 14.2793   | 14.6442  | 17.0872  | 30       | 30       | 17.1461  |
| 21.6595   | 15.9137   | 30       | 30       | 30       | 19.0538  | 30       |
| 30        | 16.8962   | 30       | 19.0312  | 30       | 30       | 30       |
| 14.6682   | 15.3069   | 30       | 16.4804  | 30       | 23.8753  | 18.2851  |
| 16.783    | 13.5335   | 19.6252  | 22.2573  | 30       | 23.358   | 30       |
| 30        | 17.1535   | 30       | 16.8579  | 30       | 30       | 30       |
| 30        | 30        | 30       | 30       | 30       | 30       | 30       |
| 30        | 14.722    | 30       | 18.5123  | 30       | 30       | 30       |
| 16.2148   | 15.1928   | 30       | 30       | 30       | 30       | 30       |
| 14.9769   | 30        | 15.2656  | 18.6586  | 30       | 22.0763  | 15.8964  |
| 17.6511   | 14.0104   | 17.9763  | 16.8118  | 30       | 18.5107  | 19.0329  |
| 16.4973   | 15.7551   | 16.6299  | 15.3406  | 30       | 30       | 30       |
| 30        | 30        | 30       | 30       | 30       | 23.0048  | 30       |
| 16.3347   | 15.0673   | 30       | 30       | 30       | 19.0437  | 16.726   |
| 16.3617   | 30        | 30       | 30       | 30       | 30       | 30       |
| 30        | 30        | 30       | 30       | 30       | 30       | 30       |
| 16.9939   | 13.9657   | 20.3766  | 30       | 30       | 30       | 30       |
| 18.2314   | 19.1605   | 16.4447  | 16.8178  | 30       | 21.1153  | 30       |
| 16.1568   | 16.6545   | 30       | 30       | 30       | 30       | 30       |
| 16.6098   | 13.7723   | 16.7612  | 20.102   | 21.2375  | 17.6216  | 19.59    |
| 17.3823   | 15.0394   | 18.5236  | 30       | 30       | 30       | 20.6439  |
| 16.9863   | 15.0307   | 15.7087  | 17.0217  | 30       | 20.9279  | 17.4688  |
| 17.3495   | 15.092    | 17.2649  | 30       | 30       | 30       | 16.727   |
| 17.0434   | 15.1458   | 30       | 30       | 30       | 30       | 30       |
| 16.0668   | 13.6674   | 30       | 30       | 30       | 30       | 17.7311  |
| 30        | 16.2152   | 20.3557  | 30       | 30       | 24.0006  | 30       |
| 18.1077   | 14.9377   | 14.9908  | 15.2884  | 16.9053  | 30       | 30       |
| 17.6632   | 14.6953   | 15.7418  | 15.3447  | 30       | 30       | 17.5838  |

|         |         |         |         |         |         |         |
|---------|---------|---------|---------|---------|---------|---------|
| 15.0326 | 13.4346 | 30      | 15.0297 | 30      | 30      | 30      |
| 16.882  | 15.6778 | 30      | 15.9396 | 30      | 30      | 30      |
| 30      | 15.1428 | 16.2791 | 17.2741 | 30      | 21.1637 | 30      |
| 30      | 15.7306 | 16.6588 | 30      | 30      | 30      | 30      |
| 14.9754 | 14.3473 | 14.8847 | 30      | 30      | 20.1606 | 15.4871 |
| 15.7015 | 13.31   | 15.1449 | 18.5457 | 30      | 24.9129 | 30      |
| 30      | 15.6708 | 18.7267 | 16.8557 | 30      | 22.0278 | 30      |
| 15.752  | 14.5969 | 16.8121 | 19.9396 | 30      | 30      | 16.5019 |
| 16.9794 | 14.6851 | 30      | 30      | 30      | 30      | 16.8306 |
| 15.4657 | 14.6268 | 30      | 17.8957 | 30      | 23.8001 | 30      |
| 15.8229 | 30      | 16.4637 | 16.5939 | 30      | 23.9108 | 30      |
| 16.7008 | 14.1954 | 30      | 22.1547 | 30      | 30      | 17.3201 |
| 16.5955 | 15.1754 | 15.737  | 19.9755 | 30      | 30      | 30      |
| 30      | 14.7428 | 30      | 17.4666 | 30      | 30      | 30      |
| 30      | 30      | 30      | 30      | 30      | 30      | 30      |
| 19.1055 | 13.8439 | 30      | 15.0575 | 30      | 20.1988 | 30      |
| 16.7525 | 30      | 16.9914 | 30      | 30      | 30      | 16.1692 |
| 20.2386 | 14.8778 | 30      | 16.7489 | 30      | 22.2791 | 21.7155 |
| 18.2674 | 14.9613 | 30      | 16.6772 | 30      | 19.071  | 18.8353 |
| 18.192  | 13.64   | 16.2409 | 30      | 30      | 30      | 30      |
| 30      | 16.7867 | 19.4445 | 22.1251 | 30      | 30      | 17.6695 |
| 17.8474 | 15.1571 | 30      | 20.1051 | 30      | 30      | 30      |
| 30      | 15.9378 | 15.7905 | 30      | 30      | 30      | 30      |
| 17.1555 | 14.4596 | 30      | 18.3908 | 30      | 22.9225 | 30      |
| 30      | 30      | 30      | 30      | 30      | 30      | 18.6149 |
| 18.364  | 15.5633 | 17.0035 | 30      | 30      | 30      | 30      |
| 17.0305 | 30      | 17.1375 | 16.1996 | 19.5634 | 30      | 30      |
| 30      | 16.7767 | 18.5694 | 30      | 30      | 21.88   | 30      |
| 17.2666 | 15.4724 | 17.3919 | 16.9316 | 30      | 25.8862 | 16.8371 |
| 17.7685 | 14.7273 | 30      | 30      | 22.3099 | 20.2024 | 30      |
| 16.1987 | 14.8283 | 30      | 16.954  | 30      | 24.1183 | 18.6567 |
| 30      | 15.4853 | 17.2331 | 30      | 23.2096 | 30      | 30      |
| 17.2133 | 14.9622 | 30      | 15.9627 | 30      | 20.3965 | 15.1907 |
| 16.2784 | 30      | 16.2438 | 30      | 30      | 25.8926 | 30      |
| 30      | 18.2459 | 30      | 30      | 30      | 30      | 30      |
| 30      | 30      | 30      | 30      | 30      | 30      | 30      |
| 23.2044 | 13.889  | 30      | 30      | 30      | 30      | 30      |
| 30      | 15.5439 | 30      | 30      | 30      | 30      | 19.3471 |
| 19.1835 | 15.5897 | 18.1783 | 20.2051 | 30      | 23.1501 | 30      |
| 16.1483 | 12.7404 | 21.3373 | 22.724  | 24.2823 | 19.9705 | 15.1747 |
| 17.0595 | 30      | 23.3276 | 16.1401 | 30      | 30      | 15.8256 |

|         |         |         |         |         |         |         |
|---------|---------|---------|---------|---------|---------|---------|
| 30      | 30      | 15.6209 | 23.51   | 30      | 30      | 30      |
| 30      | 15.4082 | 30      | 18.7714 | 30      | 24.0218 | 30      |
| 30      | 14.7217 | 19.6747 | 16.4115 | 30      | 18.2145 | 30      |
| 30      | 18.4837 | 16.2665 | 18.1995 | 30      | 25.9786 | 30      |
| 19.2756 | 15.8379 | 30      | 30      | 18.7855 | 18.3765 | 30      |
| 19.9371 | 14.4046 | 17.284  | 17.0432 | 23.3414 | 24.1536 | 30      |
| 20.9843 | 30      | 17.1901 | 30      | 30      | 30      | 30      |
| 17.5685 | 13.7962 | 16.1869 | 13.6828 | 30      | 17.4967 | 30      |
| 18.1551 | 16.238  | 30      | 17.8124 | 30      | 21.8087 | 30      |
| 23.1125 | 15.563  | 30      | 30      | 30      | 30      | 20.2311 |

| Hes1_A66 | Hes5_A78 | Hes5_A90 | Hif1a_A07 | Hif1a_A19 | Hopx_A31 | Hopx_A43 |
|----------|----------|----------|-----------|-----------|----------|----------|
| 30       | 30       | 30       | 30        | 30        | 17.8211  | 16.9958  |
| 16.0242  | 30       | 30       | 30        | 30        | 16.6385  | 16.7757  |
| 30       | 30       | 30       | 30        | 30        | 23.2386  | 24.1047  |
| 30       | 30       | 19.352   | 30        | 17.0041   | 16.7523  | 16.5617  |
| 30       | 30       | 30       | 14.4816   | 14.6228   | 19.7699  | 19.2651  |
| 22.8523  | 30       | 30       | 14.2252   | 16.9483   | 16.1917  | 16.3655  |
| 15.1942  | 22.1805  | 30       | 13.0085   | 13.7814   | 30       | 30       |
| 22.8346  | 30       | 30       | 14.1467   | 14.1194   | 15.3154  | 15.3656  |
| 30       | 30       | 30       | 30        | 14.7406   | 16.5169  | 16.3868  |
| 18.3905  | 30       | 30       | 14.0895   | 30        | 15.1157  | 15.1564  |
| 16.4548  | 30       | 30       | 30        | 15.1583   | 15.9443  | 15.7206  |
| 15.5284  | 30       | 23.8765  | 14.9013   | 14.6082   | 17.1926  | 16.7396  |
| 16.2734  | 30       | 30       | 15.6462   | 16.3291   | 18.2418  | 18.9567  |
| 30       | 30       | 30       | 30        | 19.7225   | 15.3539  | 15.2707  |
| 30       | 30       | 30       | 16.6521   | 16.7057   | 15.5873  | 15.7846  |
| 30       | 30       | 30       | 30        | 30        | 15.1631  | 15.224   |
| 30       | 30       | 30       | 11.6345   | 14.6868   | 15.2695  | 15.3272  |
| 30       | 18.7879  | 30       | 16.4403   | 16.7684   | 17.3854  | 16.8462  |
| 30       | 21.6282  | 19.8269  | 14.4442   | 15.6277   | 17.4947  | 17.7818  |
| 30       | 30       | 30       | 16.9678   | 30        | 30       | 30       |
| 17.3091  | 30       | 30       | 30        | 30        | 15.2751  | 15.1175  |
| 16.8767  | 30       | 30       | 15.2767   | 15.1258   | 30       | 30       |
| 17.0477  | 30       | 30       | 14.5525   | 14.1361   | 15.3081  | 15.4536  |
| 22.8766  | 30       | 30       | 15.6507   | 30        | 15.0828  | 14.7077  |
| 30       | 30       | 30       | 30        | 30        | 30       | 30       |
| 21.0645  | 19.5212  | 21.5009  | 15.8628   | 16.3664   | 17.0907  | 17.2583  |
| 30       | 30       | 30       | 14.8003   | 30        | 16.059   | 16.3807  |
| 30       | 30       | 30       | 30        | 30        | 30       | 30       |
| 16.9502  | 23.7446  | 30       | 13.7032   | 30        | 15.6686  | 15.6982  |
| 30       | 20.5878  | 20.6346  | 30        | 30        | 15.7931  | 15.6957  |
| 16.3378  | 30       | 30       | 16.3572   | 16.1261   | 17.1467  | 17.3342  |
| 30       | 30       | 23.3425  | 14.6951   | 30        | 14.9828  | 15.2063  |
| 17.0605  | 20.8546  | 30       | 14.7776   | 17.1293   | 17.0594  | 17.5254  |
| 15.973   | 19.5878  | 20.8178  | 14.7476   | 13.8166   | 15.4276  | 15.5768  |
| 17.3984  | 30       | 30       | 15.9329   | 15.9311   | 16.0228  | 15.8392  |
| 30       | 30       | 30       | 14.5575   | 13.8472   | 16.4209  | 16.4413  |
| 16.7606  | 20.0245  | 19.9483  | 14.363    | 15.3925   | 17.1982  | 17.2228  |
| 16.4866  | 30       | 24.4521  | 30        | 30        | 16.5789  | 16.4786  |
| 20.1567  | 30       | 30       | 14.3377   | 30        | 15.2907  | 15.2338  |
| 30       | 30       | 30       | 15.782    | 30        | 14.8013  | 14.6994  |



|         |         |         |         |         |         |         |
|---------|---------|---------|---------|---------|---------|---------|
| 30      | 30      | 30      | 13.5704 | 14.0304 | 17.4495 | 17.3572 |
| 30      | 20.6286 | 19.7277 | 15.096  | 14.2894 | 16.5497 | 16.4074 |
| 30      | 30      | 30      | 13.6263 | 15.9974 | 14.8322 | 14.6461 |
| 30      | 23.7295 | 30      | 15.4701 | 14.203  | 16.2507 | 16.3593 |
| 15.0491 | 23.8082 | 21.2248 | 13.5748 | 12.4215 | 15.6594 | 15.5754 |
| 30      | 30      | 30      | 13.9841 | 13.8366 | 15.0655 | 15.384  |
| 30      | 30      | 30      | 14.32   | 30      | 15.3283 | 15.1596 |
| 15.2324 | 30      | 24.4324 | 12.7558 | 14.8807 | 17.0621 | 17.2799 |
| 21.116  | 21.388  | 23.0576 | 14.7351 | 30      | 16.8517 | 16.8247 |
| 30      | 20.8729 | 23.3178 | 11.418  | 13.2302 | 30      | 30      |
| 30      | 30      | 30      | 13.4446 | 15.0126 | 18.889  | 18.7854 |
| 15.1365 | 30      | 30      | 14.1422 | 14.6381 | 30      | 30      |
| 30      | 20.8928 | 24.3565 | 30      | 30      | 30      | 30      |
| 30      | 30      | 30      | 13.2516 | 13.9361 | 14.9594 | 15.0673 |
| 30      | 21.9589 | 23.4981 | 15.381  | 15.2207 | 16.9649 | 17.0577 |
| 23.923  | 30      | 22.3649 | 14.1113 | 15.3154 | 30      | 30      |
| 15.3549 | 30      | 30      | 15.3695 | 30      | 14.425  | 14.5852 |
| 17.0473 | 18.6177 | 19.0696 | 30      | 20.5571 | 15.1265 | 15.3127 |
| 30      | 30      | 30      | 14.0918 | 17.8593 | 14.2857 | 14.1553 |
| 30      | 19.4554 | 30      | 14.9524 | 22.6066 | 15.9537 | 15.9799 |
| 20.7888 | 30      | 30      | 30      | 16.4948 | 23.025  | 30      |
| 30      | 23.9334 | 21.7638 | 14.1437 | 30      | 18.0049 | 17.7373 |
| 30      | 19.5148 | 21.6555 | 15.63   | 15.4179 | 16.1914 | 16.3818 |
| 30      | 30      | 30      | 30      | 16.167  | 19.529  | 18.5734 |
| 30      | 19.7671 | 21.8429 | 15.4425 | 30      | 30      | 21.2888 |
| 30      | 19.7219 | 23.1583 | 14.1063 | 16.2344 | 30      | 30      |
| 30      | 23.9522 | 19.8449 | 15.4105 | 30      | 16.9592 | 16.9255 |
| 30      | 30      | 30      | 14.5234 | 30      | 16.3264 | 16.0425 |
| 16.351  | 30      | 30      | 15.7613 | 16.3181 | 15.479  | 15.7502 |
| 16.5619 | 30      | 30      | 14.4896 | 14.8706 | 23.3311 | 23.1278 |
| 15.5621 | 30      | 20.8266 | 14.2925 | 16.6228 | 15.4985 | 15.6442 |
| 19.2545 | 30      | 30      | 15.7062 | 15.7879 | 15.9829 | 15.7052 |
| 14.0353 | 30      | 23.5597 | 14.9877 | 16.2848 | 16.5486 | 16.6098 |
| 30      | 30      | 30      | 14.8489 | 30      | 16.5202 | 16.5643 |
| 30      | 30      | 21.4223 | 14.3949 | 17.9503 | 17.788  | 17.7518 |
| 30      | 30      | 30      | 30      | 30      | 30      | 30      |
| 30      | 30      | 30      | 12.6356 | 14.4182 | 17.1071 | 16.9608 |
| 17.1883 | 20.6939 | 22.0928 | 30      | 16.3126 | 15.6245 | 15.8829 |
| 30      | 21.0694 | 19.6358 | 21.8821 | 30      | 30      | 30      |
| 15.583  | 19.5884 | 30      | 12.9141 | 14.3591 | 15.62   | 15.7137 |
| 14.985  | 18.313  | 22.7945 | 12.6925 | 14.7953 | 16.5613 | 16.7079 |

|         |         |         |         |         |         |         |
|---------|---------|---------|---------|---------|---------|---------|
| 17.886  | 20.1429 | 23.3403 | 30      | 14.522  | 15.8234 | 15.7029 |
| 30      | 30      | 30      | 14.3752 | 16.8916 | 15.0357 | 14.9798 |
| 30      | 30      | 20.4701 | 15.8526 | 30      | 17.2923 | 17.5734 |
| 30      | 20.3813 | 24.4075 | 14.0957 | 15.4731 | 17.1157 | 17.2089 |
| 30      | 18.429  | 19.5946 | 30      | 15.2586 | 30      | 30      |
| 30      | 18.4487 | 20.6222 | 13.5551 | 15.4355 | 30      | 30      |
| 30      | 21.8615 | 30      | 14.6237 | 17.4326 | 18.454  | 18.1709 |
| 15.702  | 21.9639 | 30      | 13.3562 | 15.0589 | 18.771  | 18.3848 |
| 30      | 19.5891 | 19.8501 | 14.2035 | 30      | 17.3125 | 17.0692 |
| 16.7675 | 30      | 30      | 21.1534 | 30      | 15.8811 | 15.8283 |

| Jag1_A55 | Jag1_A67 | Lgr5_A79 | Lgr5_A91 | Lrig1_A08 | Lrig1_A20 | Lyz2_A32 |
|----------|----------|----------|----------|-----------|-----------|----------|
| 30       | 30       | 30       | 30       | 30        | 30        | 11.9072  |
| 30       | 30       | 30       | 30       | 30        | 30        | 12.9967  |
| 22.2411  | 30       | 30       | 30       | 30        | 30        | 15.1789  |
| 22.3313  | 30       | 20.9695  | 16.0759  | 30        | 30        | 12.5914  |
| 26.4606  | 30       | 30       | 21.5546  | 17.9247   | 17.5875   | 16.5257  |
| 18.3369  | 30       | 30       | 30       | 30        | 18.1162   | 13.6005  |
| 19.2221  | 30       | 23.7481  | 30       | 17.5193   | 17.2752   | 17.439   |
| 17.7336  | 30       | 30       | 30       | 30        | 17.5582   | 13.8875  |
| 20.6015  | 30       | 30       | 30       | 30        | 30        | 12.8661  |
| 19.7459  | 30       | 30       | 30       | 21.1329   | 17.4774   | 11.6802  |
| 16.5519  | 17.1841  | 30       | 30       | 30        | 15.1913   | 12.926   |
| 21.1412  | 30       | 30       | 30       | 30        | 17.2397   | 17.2242  |
| 16.9129  | 15.8226  | 30       | 30       | 20.7268   | 15.9583   | 14.5571  |
| 30       | 30       | 30       | 30       | 15.6247   | 30        | 14.8969  |
| 19.143   | 30       | 30       | 30       | 30        | 30        | 13.299   |
| 20.9777  | 30       | 30       | 30       | 19.7069   | 17.8345   | 11.5439  |
| 20.6428  | 30       | 30       | 30       | 16.631    | 16.6525   | 15.0348  |
| 30       | 30       | 16.1048  | 21.4982  | 30        | 15.4948   | 12.9496  |
| 19.3408  | 30       | 14.9125  | 18.4078  | 18.1652   | 17.3628   | 15.2963  |
| 30       | 30       | 30       | 30       | 30        | 30        | 13.1082  |
| 30       | 30       | 16.2749  | 30       | 30        | 24.2588   | 13.2341  |
| 17.7008  | 23.1106  | 30       | 30       | 17.9643   | 16.8289   | 13.2696  |
| 18.3575  | 30       | 15.5764  | 30       | 15.3329   | 16.9002   | 11.6356  |
| 24.2693  | 30       | 30       | 30       | 16.4606   | 30        | 11.247   |
| 21.3506  | 30       | 30       | 30       | 30        | 30        | 18.8643  |
| 21.0986  | 30       | 30       | 20.8292  | 17.6508   | 16.7613   | 12.645   |
| 16.9817  | 30       | 30       | 30       | 30        | 30        | 12.8197  |
| 21.0375  | 30       | 30       | 30       | 30        | 30        | 18.0425  |
| 22.7483  | 30       | 15.7102  | 30       | 30        | 30        | 12.7372  |
| 23.5179  | 30       | 16.9068  | 30       | 30        | 30        | 13.6058  |
| 23.2814  | 30       | 30       | 30       | 16.7258   | 19.4467   | 12.8601  |
| 24.3754  | 21.32    | 14.4927  | 22.8405  | 30        | 16.609    | 13.9011  |
| 30       | 30       | 22.1592  | 30       | 17.5208   | 15.1643   | 14.1145  |
| 23.3282  | 23.5736  | 30       | 30       | 15.4358   | 16.9944   | 14.1822  |
| 20.9075  | 30       | 30       | 19.8297  | 18.7371   | 17.7318   | 15.5668  |
| 19.9383  | 18.2415  | 30       | 30       | 17.2136   | 16.4129   | 16.1688  |
| 18.376   | 30       | 30       | 19.1222  | 30        | 19.7884   | 13.4613  |
| 20.6963  | 30       | 30       | 30       | 18.3501   | 19.2443   | 13.5335  |
| 21.2613  | 23.8379  | 30       | 30       | 18.0177   | 17.1195   | 12.3621  |
| 19.2386  | 30       | 30       | 30       | 16.4047   | 19.3322   | 13.1908  |

|         |         |         |         |         |         |         |
|---------|---------|---------|---------|---------|---------|---------|
| 19.8784 | 30      | 30      | 30      | 18.9404 | 18.4995 | 13.5706 |
| 17.5752 | 30      | 30      | 30      | 17.4559 | 15.0465 | 12.6339 |
| 17.4041 | 18.4533 | 30      | 30      | 30      | 19.7116 | 12.0643 |
| 22.8385 | 30      | 30      | 30      | 17.2427 | 30      | 13.4969 |
| 18.2584 | 30      | 30      | 30      | 16.2238 | 14.8588 | 11.9369 |
| 20.8154 | 30      | 30      | 30      | 17.4359 | 15.9494 | 12.8112 |
| 20.5121 | 30      | 16.0143 | 30      | 30      | 15.8089 | 14.8931 |
| 20.6731 | 16.2297 | 30      | 30      | 30      | 16.5008 | 16.8733 |
| 19.3665 | 30      | 20.3739 | 30      | 18.9774 | 30      | 15.2312 |
| 30      | 30      | 30      | 30      | 30      | 30      | 16.7118 |
| 21.012  | 30      | 16.6424 | 23.8442 | 15.815  | 14.7561 | 13.854  |
| 22.1342 | 30      | 30      | 30      | 16.1483 | 15.4018 | 15.6832 |
| 20.2645 | 30      | 30      | 30      | 16.7405 | 30      | 16.7159 |
| 16.235  | 30      | 30      | 30      | 15.8732 | 18.286  | 14.8066 |
| 20.5022 | 30      | 23.5008 | 21.3813 | 19.1484 | 16.6346 | 14.5156 |
| 30      | 30      | 30      | 30      | 17.0022 | 18.072  | 14.5604 |
| 17.5219 | 30      | 17.1198 | 17.9912 | 30      | 16.3034 | 14.3276 |
| 17.1897 | 30      | 16.0158 | 30      | 17.8999 | 15.6615 | 13.7616 |
| 19.8104 | 30      | 30      | 30      | 21.8645 | 16.1764 | 12.8663 |
| 21.1598 | 30      | 30      | 30      | 30      | 16.4018 | 16.1572 |
| 18.7364 | 30      | 30      | 30      | 30      | 18.7401 | 14.1895 |
| 24.6573 | 30      | 30      | 30      | 16.0796 | 14.6317 | 14.5669 |
| 24.4629 | 30      | 30      | 30      | 17.772  | 19.3794 | 15.218  |
| 30      | 24.0221 | 30      | 30      | 14.3441 | 17.2508 | 13.804  |
| 24.2864 | 30      | 30      | 30      | 17.0641 | 14.0112 | 14.3198 |
| 20.02   | 24.1166 | 30      | 30      | 18.3351 | 16.7671 | 14.0506 |
| 17.1523 | 30      | 16.9395 | 17.7967 | 18.5335 | 16.0328 | 18.5764 |
| 21.6919 | 30      | 17.1589 | 30      | 15.9582 | 15.0538 | 15.6206 |
| 24.4277 | 16.704  | 16.4663 | 30      | 30      | 16.442  | 14.5846 |
| 19.976  | 30      | 30      | 30      | 18.1048 | 30      | 15.9243 |
| 17.699  | 24.1542 | 30      | 30      | 15.5835 | 16.545  | 13.235  |
| 18.682  | 30      | 15.3459 | 17.3156 | 16.6787 | 14.782  | 15.0819 |
| 21.497  | 20.7379 | 17.4371 | 19.1039 | 16.3778 | 16.7415 | 14.5762 |
| 21.6435 | 30      | 15.6605 | 30      | 21.2437 | 16.6781 | 15.7319 |
| 18.6464 | 30      | 30      | 30      | 19.3657 | 16.6528 | 14.6927 |
| 21.9    | 30      | 30      | 30      | 30      | 30      | 19.8222 |
| 22.9194 | 30      | 30      | 30      | 15.6655 | 14.802  | 13.9632 |
| 30      | 30      | 17.4752 | 18.3179 | 21.611  | 16.518  | 14.7761 |
| 24.6809 | 30      | 30      | 30      | 15.8241 | 21.4253 | 15.8063 |
| 20.3247 | 18.3154 | 13.7419 | 19.8659 | 15.4306 | 13.8556 | 15.3221 |
| 21.5519 | 20.9099 | 16.7571 | 30      | 16.6734 | 15.0571 | 14.4066 |

|         |         |    |         |         |         |         |
|---------|---------|----|---------|---------|---------|---------|
| 15.8083 | 30      | 30 | 20.4134 | 18.54   | 21.1609 | 12.2593 |
| 21.9239 | 16.4955 | 30 | 30      | 30      | 30      | 12.8522 |
| 22.6705 | 30      | 30 | 30      | 16.7347 | 16.4045 | 12.8493 |
| 25.5282 | 30      | 30 | 30      | 21.8104 | 16.1383 | 14.188  |
| 24.5537 | 15.9431 | 30 | 30      | 30      | 30      | 17.9323 |
| 18.6287 | 19.0307 | 30 | 30      | 19.0326 | 14.6314 | 17.0598 |
| 17.0499 | 17.4115 | 30 | 30      | 17.2886 | 22.9388 | 17.2302 |
| 30      | 30      | 30 | 30      | 15.8649 | 19.1016 | 14.6333 |
| 16.8218 | 30      | 30 | 30      | 17.0794 | 16.7787 | 14.0116 |
| 22.0447 | 30      | 30 | 23.4207 | 30      | 30      | 14.466  |

| Lyz2_A44 | Msi1_A56 | Msi1_A68 | Msi2_A80 | Msi2_A92 | Myb_A09 | Myb_A21 |
|----------|----------|----------|----------|----------|---------|---------|
| 11.0082  | 17.5751  | 16.2596  | 15.5898  | 19.4819  | 30      | 17.4615 |
| 12.1122  | 16.184   | 30       | 15.8637  | 18.5684  | 30      | 30      |
| 14.9989  | 19.6006  | 23.2112  | 30       | 30       | 30      | 20.1236 |
| 12.2747  | 30       | 30       | 30       | 30       | 30      | 18.0908 |
| 16.2192  | 19.2814  | 23.4457  | 16.807   | 18.9821  | 30      | 30      |
| 12.8677  | 17.3086  | 30       | 16.4882  | 30       | 30      | 18.3451 |
| 14.6474  | 30       | 30       | 20.2741  | 30       | 30      | 24.4298 |
| 12.8937  | 16.7325  | 30       | 15.922   | 17.4839  | 23.3088 | 17.2197 |
| 12.1597  | 30       | 30       | 17.499   | 18.4214  | 30      | 30      |
| 11.0006  | 30       | 30       | 15.9995  | 17.6413  | 30      | 30      |
| 12.1722  | 30       | 30       | 14.8631  | 30       | 30      | 30      |
| 20.0123  | 14.6893  | 18.6784  | 30       | 30       | 30      | 30      |
| 14.3994  | 18.0718  | 18.5068  | 15.8732  | 30       | 17.842  | 19.7516 |
| 14.2441  | 16.4342  | 21.7363  | 16.8178  | 18.469   | 17.8368 | 18.677  |
| 12.7408  | 17.469   | 30       | 16.992   | 30       | 30      | 30      |
| 11.3073  | 30       | 17.6144  | 15.6497  | 16.6194  | 16.3641 | 17.5449 |
| 13.559   | 14.5228  | 17.8408  | 14.1868  | 16.5756  | 30      | 30      |
| 12.1413  | 23.4017  | 19.0161  | 14.5772  | 17.2752  | 17.8591 | 19.432  |
| 14.167   | 30       | 16.7537  | 17.5124  | 19.3116  | 16.4107 | 16.981  |
| 12.4777  | 17.7019  | 30       | 15.6623  | 30       | 30      | 30      |
| 12.3224  | 16.1306  | 18.4749  | 30       | 18.4447  | 30      | 17.558  |
| 12.6272  | 16.6629  | 30       | 18.0203  | 16.088   | 18.0093 | 19.13   |
| 11.0206  | 15.0147  | 17.8857  | 15.7313  | 20.2275  | 15.4737 | 30      |
| 10.4996  | 14.1944  | 23.3234  | 15.2957  | 30       | 16.6885 | 19.8721 |
| 30       | 30       | 30       | 30       | 30       | 30      | 30      |
| 12.5449  | 16.3534  | 17.4938  | 17.2307  | 30       | 30      | 30      |
| 12.2667  | 17.8104  | 22.2044  | 30       | 30       | 30      | 18.5032 |
| 30       | 30       | 30       | 30       | 30       | 30      | 30      |
| 12.4698  | 16.0352  | 30       | 15.7616  | 18.8316  | 30      | 30      |
| 13.2293  | 30       | 30       | 30       | 30       | 30      | 30      |
| 12.5814  | 30       | 30       | 20.764   | 30       | 17.7167 | 30      |
| 13.1654  | 14.3595  | 17.8435  | 14.7536  | 18.5134  | 30      | 20.1957 |
| 12.7473  | 16.8903  | 22.4975  | 15.769   | 17.1943  | 30      | 18.2775 |
| 14.2316  | 16.3362  | 23.5439  | 23.377   | 30       | 18.5082 | 16.0934 |
| 14.5051  | 15.9023  | 19.7866  | 17.2548  | 23.9093  | 30      | 30      |
| 15.3265  | 30       | 30       | 30       | 23.8197  | 30      | 30      |
| 12.7531  | 14.7189  | 18.2876  | 16.0386  | 30       | 30      | 22.9586 |
| 13.0541  | 30       | 20.7302  | 14.9335  | 20.9911  | 21.8638 | 30      |
| 11.4737  | 15.8553  | 17.4767  | 16.5516  | 17.8094  | 15.978  | 19.3548 |
| 12.0561  | 16.3435  | 30       | 23.4781  | 16.373   | 17.067  | 17.3926 |

|         |         |         |         |         |         |         |
|---------|---------|---------|---------|---------|---------|---------|
| 12.6915 | 15.3183 | 17.3319 | 30      | 19.2767 | 21.7658 | 18.2624 |
| 11.4238 | 15.1334 | 19.1247 | 14.6865 | 23.609  | 16.3632 | 20.2007 |
| 11.3319 | 16.9735 | 23.456  | 17.355  | 17.3512 | 30      | 23.9214 |
| 13.1883 | 18.7902 | 30      | 15.4558 | 18.0118 | 15.4068 | 16.8371 |
| 11.1761 | 15.5876 | 18.1037 | 30      | 18.1716 | 30      | 30      |
| 12.4543 | 15.2506 | 23.2857 | 14.2724 | 30      | 22.2328 | 19.5446 |
| 15.8123 | 19.4821 | 30      | 30      | 30      | 16.9636 | 21.1258 |
| 15.617  | 14.6394 | 18.2142 | 15.884  | 30      | 30      | 30      |
| 13.8985 | 16.7169 | 30      | 30      | 22.0767 | 30      | 30      |
| 16.3792 | 30      | 30      | 15.475  | 19.3923 | 30      | 30      |
| 13.3347 | 17.4388 | 17.9001 | 15.6357 | 30      | 30      | 17.7941 |
| 14.5839 | 14.5481 | 19.4646 | 15.8687 | 30      | 19.4017 | 20.1617 |
| 14.91   | 16.7737 | 16.8674 | 17.0215 | 30      | 30      | 17.5384 |
| 14.1423 | 16.5951 | 30      | 16.2936 | 19.7924 | 30      | 30      |
| 14.157  | 14.5998 | 20.363  | 15.2263 | 16.3915 | 30      | 30      |
| 13.2325 | 30      | 30      | 18.2185 | 23.9396 | 30      | 30      |
| 13.49   | 13.8963 | 15.6364 | 15.0658 | 15.9755 | 30      | 30      |
| 12.6312 | 16.7042 | 18.1078 | 30      | 17.7752 | 17.5841 | 18.6406 |
| 11.9487 | 14.2262 | 19.8303 | 14.9098 | 21.9689 | 17.5666 | 30      |
| 15.469  | 15.1828 | 16.8346 | 16.1163 | 17.3592 | 30      | 24.3229 |
| 13.6654 | 14.271  | 19.0472 | 30      | 21.3122 | 30      | 18.1305 |
| 13.4061 | 17.5397 | 23.3279 | 14.495  | 16.6192 | 17.1743 | 20.7263 |
| 15.5265 | 14.8574 | 30      | 17.9314 | 30      | 30      | 30      |
| 13.5813 | 16.5499 | 30      | 20.8201 | 23.3907 | 30      | 30      |
| 15.4614 | 20.3947 | 30      | 17.0072 | 21.0059 | 30      | 30      |
| 13.2468 | 16.6328 | 21.6703 | 30      | 30      | 30      | 30      |
| 15.4388 | 30      | 30      | 16.2149 | 20.3073 | 30      | 30      |
| 14.0001 | 14.5068 | 23.3096 | 15.6206 | 19.3222 | 30      | 30      |
| 14.0664 | 15.1815 | 22.131  | 16.9696 | 22.4441 | 17.1724 | 18.6179 |
| 15.5559 | 17.0675 | 18.6665 | 19.638  | 22.4029 | 30      | 23.4345 |
| 12.6252 | 17.8    | 30      | 15.5474 | 23.785  | 30      | 30      |
| 13.9427 | 16.1262 | 16.5887 | 16.4201 | 16.4697 | 30      | 20.082  |
| 14.2825 | 14.7052 | 18.5962 | 14.9813 | 16.2943 | 30      | 30      |
| 13.7498 | 16.7299 | 30      | 15.2979 | 17.4977 | 30      | 30      |
| 13.8977 | 16.4403 | 22.459  | 15.8783 | 23.4548 | 14.7777 | 18.7537 |
| 30      | 30      | 30      | 30      | 30      | 30      | 30      |
| 14.0475 | 30      | 30      | 15.851  | 30      | 30      | 19.1507 |
| 14.3074 | 30      | 30      | 17.1799 | 17.8852 | 30      | 30      |
| 14.7368 | 30      | 30      | 18.2446 | 22.6163 | 30      | 30      |
| 12.9069 | 13.7041 | 15.8037 | 14.4009 | 15.0678 | 14.0154 | 14.0311 |
| 14.4453 | 14.7879 | 19.3156 | 17.4068 | 18.4169 | 15.294  | 17.7952 |

|         |         |         |         |         |         |         |
|---------|---------|---------|---------|---------|---------|---------|
| 11.6111 | 17.9251 | 23.4909 | 14.8807 | 20.144  | 30      | 30      |
| 12.3696 | 17.4719 | 24.0059 | 30      | 30      | 30      | 30      |
| 11.859  | 21.9471 | 30      | 15.0622 | 16.8337 | 30      | 30      |
| 12.5878 | 17.4121 | 30      | 15.2502 | 19.0277 | 30      | 22.4713 |
| 14.32   | 30      | 30      | 15.6429 | 18.5444 | 30      | 30      |
| 15.8651 | 30      | 30      | 30      | 19.1568 | 15.2052 | 15.0482 |
| 14.6888 | 20.9835 | 30      | 16.7299 | 30      | 30      | 21.0163 |
| 12.6667 | 13.8506 | 19.007  | 15.9851 | 30      | 30      | 19.2441 |
| 13.4121 | 30      | 30      | 16.7607 | 19.1303 | 30      | 30      |
| 13.0024 | 15.302  | 30      | 14.7583 | 19.0573 | 30      | 30      |



| <b>Myc_A33</b> | <b>Myc_A45</b> | <b>Notch1_A57</b> | <b>Notch1_A69</b> | <b>Numb_A81</b> | <b>Numb_A93</b> | <b>Olfm4_A10</b> |
|----------------|----------------|-------------------|-------------------|-----------------|-----------------|------------------|
| 19.5672        | 30             | 19.507            | 30                | 30              | 30              | 30               |
| 20.3062        | 30             | 22.3476           | 30                | 30              | 16.2245         | 30               |
| 21.479         | 20.4083        | 23.2425           | 30                | 15.1511         | 30              | 30               |
| 20.4748        | 30             | 20.5565           | 30                | 19.2899         | 30              | 30               |
| 30             | 30             | 22.037            | 30                | 30              | 30              | 30               |
| 30             | 30             | 22.3267           | 30                | 30              | 30              | 30               |
| 18.7973        | 17.6163        | 22.8099           | 30                | 14.5411         | 14.796          | 30               |
| 30             | 30             | 17.5849           | 30                | 18.1386         | 16.8437         | 16.729           |
| 30             | 30             | 18.6782           | 30                | 30              | 30              | 30               |
| 30             | 30             | 20.5043           | 30                | 16.8289         | 17.7471         | 30               |
| 30             | 30             | 17.8212           | 30                | 30              | 30              | 30               |
| 30             | 30             | 21.7972           | 30                | 30              | 17.0079         | 30               |
| 30             | 30             | 21.1942           | 30                | 15.8952         | 16.2219         | 30               |
| 30             | 30             | 23.4202           | 30                | 30              | 20.1773         | 30               |
| 30             | 30             | 19.6747           | 30                | 17.1244         | 16.7034         | 30               |
| 22.2789        | 15.9148        | 22.051            | 30                | 17.5016         | 15.6007         | 15.9291          |
| 15.0585        | 14.974         | 21.59             | 30                | 15.9573         | 30              | 16.0017          |
| 19.354         | 30             | 30                | 30                | 18.6683         | 30              | 30               |
| 30             | 30             | 23.158            | 30                | 15.6505         | 30              | 30               |
| 30             | 30             | 21.0282           | 30                | 30              | 30              | 30               |
| 30             | 17.0559        | 30                | 30                | 30              | 30              | 30               |
| 18.7087        | 30             | 22.3692           | 30                | 16.2742         | 30              | 30               |
| 30             | 16.3698        | 30                | 30                | 15.9683         | 15.186          | 30               |
| 30             | 30             | 20.4889           | 30                | 30              | 17.4018         | 30               |
| 30             | 30             | 15.5582           | 30                | 30              | 30              | 30               |
| 19.6627        | 21.1549        | 30                | 30                | 30              | 30              | 30               |
| 30             | 17.3801        | 22.9901           | 30                | 16.9301         | 17.3735         | 17.0155          |
| 30             | 30             | 21.7801           | 30                | 30              | 30              | 30               |
| 30             | 30             | 24.0073           | 30                | 16.3947         | 30              | 30               |
| 30             | 30             | 21.5949           | 30                | 15.8466         | 16.9579         | 16.369           |
| 30             | 30             | 30                | 30                | 21.2569         | 17.5231         | 30               |
| 30             | 30             | 24.3737           | 30                | 15.3811         | 19.7846         | 30               |
| 30             | 16.8151        | 17.8752           | 30                | 30              | 30              | 30               |
| 17.9751        | 17.925         | 17.531            | 30                | 30              | 16.4602         | 30               |
| 18.2623        | 30             | 24.4327           | 30                | 16.4656         | 30              | 30               |
| 18.483         | 30             | 25.1867           | 30                | 16.9467         | 30              | 30               |
| 23.1851        | 30             | 22.1163           | 30                | 16.8193         | 18.9            | 30               |
| 30             | 18.4964        | 21.301            | 30                | 16.8847         | 17.9652         | 30               |
| 16.7677        | 30             | 20.5458           | 30                | 19.1852         | 16.2222         | 16.9642          |
| 17.8361        | 17.4767        | 23.4724           | 30                | 30              | 30              | 30               |

|         |         |         |         |         |         |         |
|---------|---------|---------|---------|---------|---------|---------|
| 30      | 30      | 22.3802 | 30      | 30      | 30      | 30      |
| 21.4451 | 17.5195 | 20.9859 | 30      | 15.6263 | 16.6754 | 30      |
| 17.3933 | 21.7243 | 18.4473 | 30      | 30      | 17.1903 | 16.2146 |
| 20.5055 | 30      | 23.9389 | 30      | 30      | 16.3359 | 22.8658 |
| 18.046  | 30      | 20.2231 | 30      | 30      | 30      | 30      |
| 18.7629 | 30      | 23.1404 | 30      | 30      | 15.362  | 30      |
| 30      | 30      | 20.2107 | 30      | 19.0369 | 15.784  | 30      |
| 20.0712 | 30      | 20.22   | 30      | 30      | 17.3312 | 30      |
| 30      | 16.9885 | 30      | 30      | 30      | 30      | 30      |
| 30      | 17.3784 | 16.7056 | 30      | 16.8389 | 16.4698 | 30      |
| 30      | 18.1058 | 20.8068 | 30      | 15.3623 | 20.5064 | 30      |
| 19.6393 | 17.6209 | 22.123  | 30      | 14.3654 | 30      | 30      |
| 30      | 16.9172 | 30      | 30      | 20.2055 | 17.0757 | 19.416  |
| 30      | 16.5017 | 19.678  | 30      | 19.0403 | 30      | 30      |
| 21.3693 | 30      | 20.0849 | 30      | 14.5505 | 16.2657 | 15.7278 |
| 30      | 20.0595 | 19.1543 | 30      | 30      | 30      | 30      |
| 30      | 17.2432 | 20.9925 | 30      | 30      | 16.0052 | 30      |
| 21.2039 | 17.5524 | 20.4141 | 30      | 17.3663 | 18.2004 | 30      |
| 30      | 30      | 23.2593 | 30      | 16.1375 | 17.7499 | 30      |
| 30      | 30      | 30      | 30      | 30      | 30      | 30      |
| 30      | 30      | 30      | 30      | 23.4464 | 18.3621 | 16.8407 |
| 30      | 17.1661 | 24.2301 | 30      | 17.6714 | 14.6734 | 30      |
| 23.237  | 30      | 20.7064 | 30      | 20.6789 | 15.9343 | 16.0296 |
| 30      | 30      | 30      | 30      | 30      | 30      | 30      |
| 30      | 30      | 23.2053 | 30      | 16.2767 | 30      | 15.8185 |
| 17.8063 | 16.8438 | 24.0387 | 30      | 18.9488 | 16.7657 | 30      |
| 30      | 30      | 22.6587 | 30      | 30      | 30      | 30      |
| 30      | 30      | 22.2122 | 30      | 30      | 30      | 30      |
| 30      | 30      | 17.6253 | 30      | 30      | 23.2947 | 18.6795 |
| 30      | 30      | 21.6957 | 30      | 30      | 30      | 30      |
| 23.1963 | 30      | 21.2446 | 30      | 30      | 30      | 17.2861 |
| 30      | 30      | 22.7261 | 30      | 18.2383 | 16.2375 | 15.3653 |
| 22.183  | 30      | 21.8014 | 30      | 18.2919 | 16.501  | 30      |
| 30      | 30      | 22.5759 | 30      | 18.1166 | 17.4955 | 30      |
| 30      | 30      | 30      | 30      | 16.0076 | 18.842  | 30      |
| 30      | 30      | 30      | 30      | 30      | 30      | 30      |
| 30      | 30      | 20.8602 | 30      | 21.1541 | 17.3258 | 30      |
| 30      | 30      | 20.8642 | 30      | 30      | 30      | 30      |
| 30      | 30      | 17.1242 | 30      | 16.218  | 16.785  | 16.3377 |
| 15.8307 | 17.1282 | 15.3637 | 21.0632 | 15.4233 | 15.262  | 9.51771 |
| 17.9322 | 17.1439 | 22.6384 | 30      | 30      | 14.4604 | 30      |

|         |         |         |    |         |         |         |
|---------|---------|---------|----|---------|---------|---------|
| 30      | 30      | 30      | 30 | 30      | 17.3756 | 30      |
| 30      | 30      | 22.9874 | 30 | 30      | 30      | 23.8298 |
| 30      | 30      | 30      | 30 | 22.3008 | 21.0771 | 30      |
| 17.4845 | 30      | 22.0073 | 30 | 30      | 17.4106 | 30      |
| 30      | 30      | 22.0046 | 30 | 30      | 30      | 30      |
| 17.2943 | 16.8899 | 16.6622 | 30 | 15.3882 | 19.0101 | 30      |
| 30      | 30      | 30      | 30 | 30      | 16.606  | 30      |
| 30      | 24.5724 | 20.2242 | 30 | 16.7794 | 16.2886 | 30      |
| 30      | 30      | 22.7508 | 30 | 30      | 19.6707 | 16.7566 |
| 30      | 30      | 21.576  | 30 | 30      | 30      | 30      |

| Pcna_A34 | Pcna_A46 | Ppargc1b_A5 | Ppargc1b_A7 | Rhoa_A82 | Rhoa_A94 | Saa2_A11 |
|----------|----------|-------------|-------------|----------|----------|----------|
| 15.1968  | 30       | 30          | 30          | 12.4761  | 13.0931  | 30       |
| 15.0821  | 30       | 30          | 30          | 12.2428  | 13.7625  | 30       |
| 15.7715  | 16.3098  | 30          | 30          | 12.7678  | 14.0204  | 30       |
| 15.7396  | 30       | 30          | 30          | 13.1244  | 13.5658  | 30       |
| 19.0165  | 21.589   | 30          | 30          | 12.5317  | 12.8676  | 30       |
| 16.5193  | 16.5015  | 30          | 30          | 13.5939  | 13.6729  | 30       |
| 11.3645  | 15.3596  | 30          | 30          | 12.0131  | 12.2718  | 30       |
| 17.9679  | 15.3055  | 30          | 30          | 13.4147  | 12.833   | 30       |
| 20.3307  | 16.3     | 30          | 30          | 12.9817  | 15.0527  | 30       |
| 18.7197  | 30       | 30          | 30          | 12.6875  | 14.4474  | 30       |
| 16.2473  | 19.2804  | 30          | 30          | 13.1258  | 14.3605  | 30       |
| 15.5917  | 17.1869  | 30          | 30          | 13.148   | 12.8345  | 30       |
| 15.1579  | 15.7294  | 16.6665     | 30          | 13.3745  | 14.4735  | 30       |
| 15.3667  | 16.7375  | 30          | 30          | 12.8434  | 13.643   | 30       |
| 16.3166  | 21.4025  | 30          | 30          | 13.7202  | 14.1363  | 30       |
| 16.4767  | 16.2921  | 30          | 30          | 11.8445  | 12.9313  | 30       |
| 15.1093  | 14.5185  | 30          | 30          | 12.9521  | 13.8601  | 30       |
| 16.442   | 16.4613  | 30          | 15.1868     | 13.0905  | 13.4151  | 30       |
| 15.4729  | 16.3598  | 30          | 30          | 12.4932  | 12.2782  | 30       |
| 15.8866  | 30       | 17.4634     | 30          | 13.2798  | 13.047   | 30       |
| 15.9551  | 15.3723  | 30          | 30          | 12.4683  | 13.9979  | 30       |
| 16.0238  | 16.2604  | 30          | 30          | 13.2893  | 14.4404  | 30       |
| 17.0663  | 15.3259  | 30          | 30          | 12.089   | 13.2161  | 30       |
| 15.622   | 17.898   | 30          | 30          | 12.5996  | 12.9669  | 30       |
| 30       | 30       | 30          | 30          | 30       | 30       | 30       |
| 15.7049  | 17.5901  | 30          | 30          | 13.0145  | 13.5834  | 30       |
| 30       | 18.5463  | 30          | 30          | 13.3852  | 14.3146  | 30       |
| 30       | 30       | 30          | 30          | 30       | 30       | 30       |
| 13.8681  | 15.7796  | 30          | 30          | 13.0293  | 13.7565  | 30       |
| 14.9985  | 30       | 30          | 24.3488     | 13.2714  | 13.7444  | 30       |
| 23.1997  | 30       | 30          | 20.5128     | 13.1324  | 13.5813  | 30       |
| 13.4536  | 17.2265  | 30          | 30          | 12.6114  | 12.9319  | 30       |
| 18.7273  | 30       | 20.2427     | 30          | 12.9156  | 13.6083  | 30       |
| 13.6723  | 14.9058  | 30          | 16.6595     | 11.9216  | 12.3606  | 30       |
| 15.416   | 30       | 17.8912     | 19.2415     | 13.239   | 13.4734  | 23.9445  |
| 16.3784  | 16.8405  | 30          | 30          | 14.0178  | 14.1281  | 30       |
| 17.0498  | 16.4534  | 16.4057     | 30          | 13.1594  | 12.6105  | 30       |
| 17.7957  | 30       | 30          | 30          | 12.9747  | 13.4282  | 30       |
| 14.8522  | 15.3481  | 30          | 30          | 12.2931  | 13.1499  | 30       |
| 15.642   | 16.4361  | 30          | 30          | 12.9602  | 13.8224  | 30       |

|         |         |         |         |         |         |         |
|---------|---------|---------|---------|---------|---------|---------|
| 15.4468 | 30      | 30      | 30      | 11.4713 | 12.6288 | 30      |
| 13.6083 | 15.3425 | 30      | 30      | 11.8866 | 12.9752 | 24.5864 |
| 17.8733 | 30      | 30      | 30      | 12.6041 | 12.5456 | 30      |
| 17.7846 | 16.2155 | 30      | 30      | 13.6456 | 13.1445 | 30      |
| 14.0099 | 15.1434 | 30      | 30      | 12.0816 | 12.9841 | 30      |
| 15.5477 | 14.6224 | 30      | 30      | 11.796  | 12.893  | 30      |
| 14.9583 | 15.5036 | 30      | 30      | 12.3072 | 13.7807 | 30      |
| 15.0228 | 15.0939 | 30      | 30      | 12.21   | 13.1159 | 30      |
| 21.3124 | 15.0329 | 30      | 30      | 13.2156 | 14.5643 | 30      |
| 11.9814 | 12.5208 | 30      | 30      | 12.4495 | 12.209  | 30      |
| 30      | 18.6789 | 18.0859 | 23.2131 | 12.2799 | 13.0062 | 30      |
| 14.6578 | 15.3331 | 30      | 30      | 13.1469 | 12.7655 | 30      |
| 17.3495 | 17.5561 | 30      | 30      | 12.8244 | 14.1488 | 30      |
| 15.1947 | 16.1015 | 30      | 30      | 13.2704 | 13.4925 | 30      |
| 16.0962 | 18.0411 | 30      | 30      | 12.3037 | 13.7265 | 30      |
| 15.4763 | 19.1317 | 30      | 16.2894 | 12.3054 | 13.1536 | 30      |
| 14.3445 | 16.5303 | 30      | 30      | 12.9434 | 13.1058 | 30      |
| 16.3784 | 30      | 30      | 20.1296 | 12.6476 | 12.8989 | 30      |
| 12.6681 | 16.5046 | 30      | 30      | 12.7858 | 12.8983 | 30      |
| 17.6542 | 17.9907 | 30      | 30      | 13.9277 | 13.4297 | 30      |
| 14.9482 | 15.0167 | 30      | 30      | 13.1858 | 14.3979 | 30      |
| 16.2438 | 17.6849 | 30      | 30      | 12.8566 | 12.7934 | 30      |
| 19.6883 | 30      | 30      | 30      | 12.8244 | 13.7407 | 30      |
| 18.2495 | 30      | 30      | 30      | 12.594  | 12.4006 | 23.7192 |
| 14.236  | 15.601  | 30      | 30      | 13.6621 | 13.555  | 30      |
| 15.8583 | 15.6343 | 30      | 30      | 12.721  | 14.6006 | 30      |
| 18.7713 | 17.8792 | 30      | 30      | 13.1833 | 13.4484 | 30      |
| 16.2598 | 18.6634 | 23.3095 | 30      | 12.656  | 13.8617 | 30      |
| 15.7177 | 18.7365 | 30      | 30      | 13.59   | 13.4533 | 30      |
| 14.8293 | 17.3163 | 30      | 30      | 13.0572 | 13.8252 | 30      |
| 14.9449 | 15.5581 | 30      | 21.5402 | 13.9604 | 13.2468 | 30      |
| 14.7498 | 14.5538 | 30      | 30      | 13.4256 | 13.72   | 30      |
| 15.9015 | 15.6701 | 30      | 30      | 12.7818 | 13.8852 | 30      |
| 15.8729 | 15.6692 | 30      | 30      | 13.4522 | 13.6084 | 30      |
| 16.0843 | 18.2849 | 30      | 30      | 12.8664 | 12.4813 | 30      |
| 30      | 30      | 30      | 30      | 30      | 30      | 30      |
| 17.2925 | 16.2869 | 30      | 30      | 12.7313 | 13.4048 | 30      |
| 15.9013 | 18.3568 | 30      | 20.0777 | 12.5987 | 12.8925 | 30      |
| 16.4352 | 16.6289 | 21.4414 | 30      | 14.0081 | 14.0383 | 30      |
| 11.9608 | 12.8153 | 30      | 19.0563 | 11.8931 | 11.8588 | 30      |
| 16.0993 | 30      | 30      | 30      | 12.1371 | 12.8442 | 30      |

|         |         |         |         |         |         |         |
|---------|---------|---------|---------|---------|---------|---------|
| 13.1631 | 16.1965 | 30      | 30      | 12.7887 | 12.9309 | 30      |
| 15.4043 | 16.7236 | 30      | 15.7015 | 13.0911 | 13.6126 | 30      |
| 16.3539 | 21.6094 | 30      | 30      | 13.7136 | 13.5483 | 30      |
| 15.8907 | 14.8565 | 30      | 30      | 12.9616 | 13.08   | 30      |
| 14.7481 | 15.6164 | 30      | 30      | 14.5077 | 14.9158 | 30      |
| 14.4394 | 17.5926 | 16.6906 | 15.2843 | 13.1639 | 12.3222 | 30      |
| 14.2347 | 15.7305 | 30      | 30      | 12.9505 | 13.5894 | 24.3769 |
| 11.3593 | 16.1808 | 30      | 30      | 11.796  | 12.4321 | 30      |
| 13.4754 | 16.1468 | 30      | 30      | 12.9811 | 14.2404 | 30      |
| 16.0697 | 14.224  | 30      | 30      | 12.8938 | 13.9086 | 30      |

| Saa2_A23 | Sirt3_A35 | Sirt3_A47 | Sox9_A59 | Sox9_A71 | Tat_A83 | Tat_A95 |
|----------|-----------|-----------|----------|----------|---------|---------|
| 16.9774  | 30        | 30        | 15.294   | 30       | 30      | 30      |
| 30       | 30        | 30        | 16.9948  | 30       | 30      | 30      |
| 20.9108  | 30        | 30        | 13.9618  | 21.6865  | 30      | 30      |
| 16.7614  | 18.5514   | 30        | 14.8721  | 30       | 30      | 30      |
| 30       | 30        | 30        | 13.9128  | 30       | 30      | 30      |
| 18.3809  | 30        | 30        | 16.8512  | 30       | 30      | 30      |
| 15.3112  | 30        | 30        | 15.5441  | 30       | 30      | 30      |
| 19.3816  | 30        | 30        | 13.7896  | 23.1996  | 30      | 30      |
| 22.745   | 30        | 30        | 14.8685  | 30       | 30      | 30      |
| 16.6426  | 23.6277   | 30        | 16.0105  | 27.2762  | 30      | 30      |
| 17.5218  | 30        | 30        | 14.4817  | 30       | 30      | 30      |
| 16.1378  | 30        | 30        | 16.79    | 30       | 30      | 30      |
| 15.9354  | 30        | 30        | 15.3498  | 30       | 30      | 30      |
| 15.4528  | 20.9198   | 30        | 13.5566  | 30       | 30      | 30      |
| 17.5278  | 30        | 30        | 18.8613  | 30       | 30      | 30      |
| 16.427   | 22.8481   | 17.5925   | 15.0787  | 26.5924  | 30      | 30      |
| 16.0241  | 30        | 30        | 14.0449  | 25.092   | 30      | 30      |
| 17.1125  | 30        | 30        | 13.2955  | 25.6022  | 30      | 30      |
| 16.9711  | 30        | 30        | 15.7641  | 30       | 30      | 30      |
| 23.2318  | 30        | 30        | 15.6912  | 30       | 30      | 30      |
| 15.7628  | 30        | 30        | 15.0826  | 30       | 30      | 30      |
| 18.0255  | 30        | 30        | 14.3713  | 30       | 30      | 30      |
| 30       | 30        | 30        | 14.308   | 26.9477  | 30      | 30      |
| 16.9571  | 30        | 30        | 15.5341  | 30       | 30      | 30      |
| 30       | 30        | 30        | 30       | 30       | 30      | 30      |
| 17.4711  | 30        | 30        | 15.0566  | 30       | 30      | 30      |
| 15.662   | 30        | 30        | 16.3299  | 30       | 21.109  | 30      |
| 30       | 30        | 30        | 30       | 30       | 30      | 30      |
| 16.3134  | 18.8023   | 30        | 16.0759  | 30       | 30      | 30      |
| 16.375   | 23.7757   | 30        | 15.2951  | 30       | 30      | 30      |
| 20.4136  | 30        | 30        | 15.7076  | 30       | 30      | 30      |
| 18.892   | 30        | 30        | 14.5332  | 30       | 30      | 30      |
| 17.2769  | 30        | 30        | 12.8779  | 30       | 30      | 30      |
| 17.448   | 17.4074   | 17.4208   | 14.5085  | 30       | 30      | 30      |
| 30       | 30        | 30        | 16.1652  | 30       | 30      | 30      |
| 16.4592  | 30        | 30        | 13.2639  | 21.8966  | 30      | 30      |
| 15.7524  | 30        | 30        | 12.9393  | 30       | 30      | 30      |
| 17.3473  | 30        | 23.6924   | 13.5831  | 30       | 30      | 30      |
| 16.5307  | 30        | 30        | 14.4075  | 26.2053  | 30      | 30      |
| 19.7476  | 30        | 30        | 14.647   | 30       | 30      | 30      |

|         |         |         |         |         |         |    |
|---------|---------|---------|---------|---------|---------|----|
| 16.219  | 30      | 30      | 18.5096 | 30      | 30      | 30 |
| 15.5937 | 30      | 30      | 15.7202 | 30      | 30      | 30 |
| 16.7512 | 30      | 23.2085 | 14.2493 | 30      | 30      | 30 |
| 17.0909 | 30      | 30      | 15.4148 | 30      | 30      | 30 |
| 18.7174 | 17.2609 | 30      | 14.4279 | 28.4758 | 30      | 30 |
| 16.156  | 30      | 20.7436 | 14.3904 | 23.0261 | 30      | 30 |
| 17.7473 | 19.0025 | 30      | 13.3451 | 28.5772 | 30      | 30 |
| 16.0198 | 30      | 30      | 16.2814 | 30      | 30      | 30 |
| 17.9383 | 30      | 30      | 15.3533 | 30      | 30      | 30 |
| 15.454  | 21.2097 | 30      | 30      | 30      | 30      | 30 |
| 16.2881 | 30      | 30      | 13.8925 | 30      | 30      | 30 |
| 17.2772 | 30      | 30      | 13.8423 | 27.8776 | 30      | 30 |
| 16.6777 | 22.5914 | 30      | 17.1924 | 30      | 30      | 30 |
| 18.1168 | 30      | 30      | 13.3749 | 26.095  | 30      | 30 |
| 19.5592 | 30      | 30      | 19.4014 | 30      | 30      | 30 |
| 18.9127 | 30      | 30      | 16.5414 | 30      | 30      | 30 |
| 16.3862 | 30      | 30      | 14.0568 | 26.9136 | 30      | 30 |
| 18.5699 | 30      | 30      | 15.9439 | 30      | 30      | 30 |
| 17.6028 | 30      | 30      | 13.9928 | 30      | 30      | 30 |
| 16.7622 | 30      | 30      | 15.5568 | 22.894  | 30      | 30 |
| 30      | 30      | 30      | 14.5239 | 30      | 21.2961 | 30 |
| 16.33   | 30      | 30      | 13.5466 | 27.5995 | 30      | 30 |
| 18.5942 | 30      | 18.2042 | 17.3686 | 26.3902 | 30      | 30 |
| 16.5171 | 30      | 30      | 14.0285 | 22.8178 | 30      | 30 |
| 17.4174 | 30      | 16.3867 | 15.2028 | 30      | 30      | 30 |
| 15.915  | 30      | 30      | 14.2318 | 30      | 30      | 30 |
| 15.615  | 30      | 30      | 17.5357 | 30      | 30      | 30 |
| 16.9198 | 30      | 30      | 14.2697 | 30      | 30      | 30 |
| 18.3503 | 30      | 16.3821 | 15.497  | 30      | 30      | 30 |
| 16.4637 | 30      | 30      | 14.5251 | 30      | 30      | 30 |
| 16.4284 | 30      | 30      | 13.5952 | 20.8048 | 30      | 30 |
| 16.6739 | 30      | 30      | 14.6363 | 28.7987 | 30      | 30 |
| 19.0651 | 30      | 30      | 13.8119 | 23.7312 | 30      | 30 |
| 19.6492 | 30      | 30      | 15.0741 | 25.236  | 30      | 30 |
| 16.2222 | 30      | 30      | 12.9991 | 22.8158 | 30      | 30 |
| 30      | 30      | 30      | 30      | 30      | 30      | 30 |
| 19.0567 | 30      | 30      | 15.1464 | 30      | 30      | 30 |
| 17.5097 | 30      | 30      | 14.7317 | 30      | 30      | 30 |
| 17.8007 | 30      | 30      | 18.2462 | 24.2175 | 30      | 30 |
| 15.0643 | 20.7932 | 30      | 12.6455 | 30      | 30      | 30 |
| 20.9353 | 30      | 30      | 13.0317 | 27.7201 | 30      | 30 |



|         |         |    |         |         |    |    |
|---------|---------|----|---------|---------|----|----|
| 17.5879 | 30      | 30 | 14.5136 | 30      | 30 | 30 |
| 16.9417 | 30      | 30 | 16.1886 | 25.1126 | 30 | 30 |
| 15.1171 | 30      | 30 | 16.9631 | 30      | 30 | 30 |
| 16.451  | 30      | 30 | 14.9841 | 30      | 30 | 30 |
| 14.3625 | 24.0363 | 30 | 30      | 30      | 30 | 30 |
| 15.2586 | 30      | 30 | 18.1883 | 30      | 30 | 30 |
| 16.2099 | 30      | 30 | 13.6389 | 26.9681 | 30 | 30 |
| 18.4823 | 30      | 30 | 14.1805 | 25.5295 | 30 | 30 |
| 16.4899 | 30      | 30 | 16.2384 | 23.8149 | 30 | 30 |
| 30      | 30      | 30 | 15.6388 | 30      | 30 | 30 |

| Tcf4_A12 | Tcf7l2_A24 | Tert_A36 | Tert_A48 | Wnt3_A60 | Wnt3_A72 | Wnt6_A84 |
|----------|------------|----------|----------|----------|----------|----------|
| 18.2174  | 21.5198    | 30       | 30       | 19.8215  | 14.7116  | 30       |
| 20.5827  | 21.555     | 30       | 30       | 16.5254  | 24.0432  | 30       |
| 19.8929  | 18.3028    | 30       | 30       | 17.1522  | 17.5326  | 30       |
| 30       | 30         | 30       | 30       | 17.3505  | 16.7914  | 30       |
| 16.011   | 19.2466    | 30       | 30       | 18.2378  | 30       | 30       |
| 30       | 30         | 30       | 30       | 16.0466  | 14.616   | 30       |
| 14.8334  | 19.3532    | 30       | 30       | 14.5695  | 30       | 30       |
| 15.0153  | 21.6348    | 30       | 30       | 18.5561  | 16.0571  | 30       |
| 16.9142  | 30         | 30       | 30       | 18.4954  | 15.3469  | 30       |
| 18.9537  | 21.5733    | 30       | 30       | 22.8633  | 16.3613  | 30       |
| 15.4346  | 21.965     | 30       | 30       | 30       | 16.1983  | 30       |
| 15.0819  | 27.5496    | 30       | 30       | 21.3579  | 30       | 30       |
| 16.4121  | 21.4022    | 30       | 30       | 17.9328  | 15.4871  | 30       |
| 18.1385  | 22.1383    | 30       | 30       | 17.2495  | 16.3832  | 30       |
| 17.061   | 23.1936    | 30       | 30       | 19.4326  | 16.6545  | 30       |
| 16.456   | 17.822     | 30       | 30       | 14.7565  | 14.6953  | 30       |
| 19.4935  | 19.1209    | 30       | 30       | 15.5359  | 16.4203  | 30       |
| 18.471   | 18.4954    | 30       | 30       | 17.4872  | 16.8331  | 30       |
| 21.2005  | 19.1838    | 30       | 30       | 30       | 19.7689  | 30       |
| 14.4407  | 21.3656    | 30       | 30       | 19.4771  | 15.7559  | 30       |
| 14.8061  | 19.5741    | 30       | 30       | 16.39    | 15.9034  | 30       |
| 16.4504  | 18.5771    | 30       | 30       | 17.7749  | 14.2055  | 30       |
| 16.0159  | 30         | 30       | 30       | 16.7396  | 16.204   | 30       |
| 16.732   | 23.1662    | 30       | 30       | 17.5612  | 16.226   | 30       |
| 30       | 30         | 30       | 30       | 30       | 30       | 30       |
| 14.7953  | 30         | 30       | 30       | 16.588   | 16.9311  | 30       |
| 16.117   | 30         | 30       | 30       | 16.7742  | 16.4249  | 30       |
| 30       | 30         | 30       | 30       | 30       | 30       | 30       |
| 30       | 20.8113    | 30       | 30       | 15.1795  | 15.3199  | 30       |
| 30       | 19.0207    | 24.2055  | 30       | 16.1661  | 15.1486  | 30       |
| 16.4848  | 19.2177    | 30       | 30       | 16.4834  | 15.4298  | 30       |
| 14.655   | 20.1748    | 30       | 30       | 15.0269  | 16.3643  | 30       |
| 15.1252  | 19.262     | 30       | 30       | 16.8683  | 17.449   | 30       |
| 16.3446  | 18.3418    | 30       | 18.8631  | 18.8292  | 16.2751  | 30       |
| 15.7384  | 17.2226    | 30       | 30       | 30       | 14.6188  | 30       |
| 23.5031  | 21.3624    | 30       | 30       | 30       | 17.7105  | 30       |
| 15.7086  | 18.6658    | 30       | 30       | 16.6409  | 30       | 30       |
| 17.3487  | 22.5088    | 30       | 30       | 16.0421  | 16.6757  | 30       |
| 30       | 26.6575    | 30       | 30       | 17.2672  | 16.6121  | 30       |
| 20.1921  | 18.5248    | 30       | 30       | 15.194   | 14.9826  | 30       |

|         |         |         |    |         |         |    |
|---------|---------|---------|----|---------|---------|----|
| 15.2565 | 23.7629 | 17.6444 | 30 | 19.5009 | 23.0121 | 30 |
| 15.0373 | 19.9869 | 30      | 30 | 16.3082 | 19.5005 | 30 |
| 21.2282 | 30      | 30      | 30 | 15.1808 | 14.4752 | 30 |
| 16.2866 | 30      | 30      | 30 | 15.7445 | 14.8144 | 30 |
| 16.8257 | 19.6514 | 30      | 30 | 13.9105 | 15.0285 | 30 |
| 15.1712 | 23.2801 | 30      | 30 | 30      | 17.3706 | 30 |
| 30      | 17.3469 | 24.4507 | 30 | 17.0845 | 13.8518 | 30 |
| 14.6249 | 25.2417 | 30      | 30 | 19.0413 | 19.0103 | 30 |
| 30      | 30      | 30      | 30 | 16.0443 | 16.0506 | 30 |
| 30      | 30      | 30      | 30 | 30      | 30      | 30 |
| 17.1346 | 19.3736 | 30      | 30 | 17.5033 | 15.6317 | 30 |
| 17.0637 | 19.6484 | 30      | 30 | 17.4265 | 16.5625 | 30 |
| 17.7072 | 30      | 30      | 30 | 19.966  | 17.8817 | 30 |
| 17.2047 | 19.767  | 30      | 30 | 17.6311 | 16.4096 | 30 |
| 15.3439 | 30      | 30      | 30 | 18.4252 | 14.4273 | 30 |
| 23.4617 | 19.6955 | 30      | 30 | 17.1147 | 18.6632 | 30 |
| 15.7373 | 20.6564 | 30      | 30 | 14.8338 | 15.1914 | 30 |
| 15.8382 | 19.0398 | 30      | 30 | 16.8778 | 17.0148 | 30 |
| 30      | 20.4412 | 30      | 30 | 15.9334 | 14.8696 | 30 |
| 20.4856 | 20.8963 | 30      | 30 | 17.2798 | 21.323  | 30 |
| 15.7957 | 20.2417 | 30      | 30 | 17.482  | 16.0411 | 30 |
| 15.9735 | 22.1213 | 30      | 30 | 19.4861 | 18.7452 | 30 |
| 14.5751 | 22.013  | 30      | 30 | 18.1605 | 15.9363 | 30 |
| 13.9202 | 19.2669 | 30      | 30 | 18.2216 | 14.4544 | 30 |
| 15.5547 | 30      | 30      | 30 | 20.8337 | 15.1685 | 30 |
| 17.5996 | 23.7039 | 30      | 30 | 17.8212 | 20.8633 | 30 |
| 16.2738 | 30      | 30      | 30 | 17.2544 | 30      | 30 |
| 19.5244 | 18.7821 | 30      | 30 | 30      | 21.7747 | 30 |
| 30      | 30      | 30      | 30 | 30      | 15.3744 | 30 |
| 19.0382 | 27.3459 | 30      | 30 | 20.8378 | 17.6625 | 30 |
| 17.3939 | 20.7342 | 30      | 30 | 15.857  | 16.3214 | 30 |
| 18.4058 | 20.275  | 30      | 30 | 15.5386 | 19.8176 | 30 |
| 18.0622 | 23.457  | 30      | 30 | 20.5736 | 19.6363 | 30 |
| 16.737  | 21.7066 | 30      | 30 | 20.9839 | 16.3864 | 30 |
| 15.5883 | 19.7699 | 30      | 30 | 16.1693 | 16.4887 | 30 |
| 30      | 30      | 30      | 30 | 30      | 19.6285 | 30 |
| 21.481  | 22.366  | 30      | 30 | 16.2196 | 17.5664 | 30 |
| 17.1596 | 18.5846 | 30      | 30 | 18.6892 | 16.5954 | 30 |
| 16.423  | 18.9925 | 30      | 30 | 18.0325 | 16.1768 | 30 |
| 15.305  | 19.3242 | 30      | 30 | 15.2617 | 17.0972 | 30 |
| 17.1266 | 19.5131 | 30      | 30 | 18.6296 | 14.9058 | 30 |

|         |         |    |    |         |         |    |
|---------|---------|----|----|---------|---------|----|
| 30      | 30      | 30 | 30 | 16.6058 | 16.6825 | 30 |
| 16.8249 | 19.6271 | 30 | 30 | 18.4321 | 23.3288 | 30 |
| 18.9869 | 21.2494 | 30 | 30 | 15.1465 | 16.5669 | 30 |
| 16.6056 | 21.7181 | 30 | 30 | 16.3234 | 16.7852 | 30 |
| 30      | 30      | 30 | 30 | 30      | 30      | 30 |
| 30      | 20.8457 | 30 | 30 | 30      | 26.1327 | 30 |
| 30      | 21.7428 | 30 | 30 | 17.6346 | 16.853  | 30 |
| 16.0111 | 21.6324 | 30 | 30 | 30      | 22.1805 | 30 |
| 30      | 30      | 30 | 30 | 23.3069 | 16.4532 | 30 |
| 30      | 22.1639 | 30 | 30 | 19.2428 | 14.2228 | 30 |





30  
30  
30  
30  
30  
30  
30  
30  
30  
30

| sampleID | Group | Areg_A01 | Areg_A13 | Ascl2_A25 | Ascl2_A37 | Atoh1_A49 |
|----------|-------|----------|----------|-----------|-----------|-----------|
| S05      | Bmi1  | 30       | 19.8039  | 30        | 30        | 30        |
| S06      | Bmi1  | 30       | 30       | 30        | 30        | 18.9808   |
| S07      | Bmi1  | 30       | 19.3406  | 23.7588   | 30        | 17.2153   |
| S08      | Bmi1  | 30       | 30       | 30        | 30        | 17.9814   |
| S17      | Bmi1  | 30       | 25.8205  | 30        | 30        | 17.1235   |
| S18      | Bmi1  | 30       | 30       | 19.0584   | 30        | 16.3413   |
| S19      | Bmi1  | 30       | 18.1333  | 30        | 30        | 16.8351   |
| S20      | Bmi1  | 30       | 30       | 12.8574   | 14.8321   | 13.7034   |
| S29      | Bmi1  | 30       | 30       | 30        | 30        | 17.0049   |
| S30      | Bmi1  | 30       | 19.4761  | 30        | 30        | 30        |
| S31      | Bmi1  | 30       | 19.6194  | 15.962    | 15.8291   | 14.2171   |
| S41      | Bmi1  | 30       | 30       | 30        | 30        | 30        |
| S42      | Bmi1  | 30       | 30       | 30        | 30        | 16.1874   |
| S43      | Bmi1  | 30       | 30       | 20.7084   | 30        | 27.2628   |
| S44      | Bmi1  | 30       | 30       | 30        | 30        | 17.3887   |
| S53      | Bmi1  | 30       | 30       | 30        | 30        | 14.4741   |
| S54      | Bmi1  | 30       | 30       | 30        | 30        | 30        |
| S55      | Bmi1  | 30       | 17.4983  | 30        | 30        | 26.2152   |
| S56      | Bmi1  | 30       | 30       | 30        | 30        | 18.2399   |
| S65      | Bmi1  | 30       | 30       | 30        | 30        | 16.7668   |
| S66      | Bmi1  | 30       | 30       | 30        | 30        | 30        |
| S67      | Bmi1  | 30       | 30       | 30        | 30        | 17.4676   |
| S68      | Bmi1  | 30       | 30       | 14.4082   | 15.9926   | 18.2503   |
| S77      | Bmi1  | 30       | 17.8538  | 30        | 30        | 24.6275   |
| S78      | Bmi1  | 30       | 30       | 30        | 30        | 21.8922   |
| S79      | Bmi1  | 30       | 30       | 30        | 30        | 30        |
| S80      | Bmi1  | 30       | 19.4297  | 30        | 30        | 16.8526   |
| S89      | Bmi1  | 30       | 30       | 30        | 30        | 30        |
| S90      | Bmi1  | 26.825   | 30       | 30        | 30        | 19.5124   |
| S91      | Bmi1  | 30       | 30       | 30        | 30        | 21.862    |
| S92      | Bmi1  | 30       | 30       | 30        | 30        | 30        |
| S05      | Bmi1  | 30       | 30       | 30        | 30        | 17.5687   |
| S06      | Bmi1  | 30       | 30       | 30        | 30        | 16.8992   |
| S07      | Bmi1  | 30       | 30       | 30        | 30        | 16.4225   |
| S08      | Bmi1  | 30       | 30       | 30        | 30        | 27.1477   |
| S17      | Bmi1  | 30       | 30       | 30        | 30        | 21.824    |
| S18      | Bmi1  | 30       | 30       | 30        | 30        | 24.6437   |
| S19      | Bmi1  | 30       | 25.5774  | 30        | 30        | 30        |
| S20      | Bmi1  | 30       | 30       | 30        | 30        | 17.997    |
| S29      | Bmi1  | 30       | 30       | 30        | 22.4093   | 16.2527   |



|     |      |    |         |         |         |         |
|-----|------|----|---------|---------|---------|---------|
| S30 | Bmi1 | 30 | 30      | 15.2461 | 16.0808 | 17.3136 |
| S31 | Bmi1 | 30 | 30      | 30      | 30      | 18.2137 |
| S32 | Bmi1 | 30 | 30      | 26.8851 | 30      | 17.252  |
| S41 | Bmi1 | 30 | 30      | 30      | 30      | 16.9316 |
| S42 | Bmi1 | 30 | 30      | 30      | 30      | 30      |
| S43 | Bmi1 | 30 | 30      | 30      | 30      | 18.1879 |
| S44 | Bmi1 | 30 | 30      | 30      | 30      | 20.1338 |
| S53 | Bmi1 | 30 | 17.9101 | 24.7792 | 30      | 17.5386 |
| S54 | Bmi1 | 30 | 30      | 30      | 30      | 13.3466 |
| S55 | Bmi1 | 30 | 30      | 30      | 30      | 16.3963 |
| S56 | Bmi1 | 30 | 26.0561 | 30      | 30      | 17.4306 |
| S65 | Bmi1 | 30 | 30      | 30      | 30      | 19.2176 |
| S66 | Bmi1 | 30 | 30      | 30      | 30      | 17.6189 |
| S67 | Bmi1 | 30 | 19.4604 | 30      | 30      | 17.5382 |
| S68 | Bmi1 | 30 | 17.1714 | 30      | 30      | 13.9701 |
| S77 | Bmi1 | 30 | 30      | 17.7209 | 30      | 14.6713 |
| S78 | Bmi1 | 30 | 30      | 30      | 30      | 23.0212 |
| S79 | Bmi1 | 30 | 30      | 30      | 30      | 18.7296 |
| S80 | Bmi1 | 30 | 30      | 30      | 30      | 30      |
| S90 | Bmi1 | 30 | 30      | 30      | 30      | 18.2541 |
| S91 | Bmi1 | 30 | 30      | 18.582  | 23.4691 | 20.4843 |
| S92 | Bmi1 | 30 | 30      | 30      | 30      | 21.7287 |
| S01 | Bmi1 | 30 | 20.1219 | 25.2229 | 30      | 26.9549 |
| S02 | Bmi1 | 30 | 30      | 30      | 30      | 14.223  |
| S03 | Bmi1 | 30 | 30      | 30      | 30      | 27.0105 |
| S04 | Bmi1 | 30 | 30      | 30      | 30      | 16.7012 |
| S13 | Bmi1 | 30 | 23.7306 | 30      | 30      | 17.346  |
| S14 | Bmi1 | 30 | 30      | 30      | 30      | 17.3034 |
| S15 | Bmi1 | 30 | 22.8191 | 14.9338 | 17.2751 | 17.1414 |
| S16 | Bmi1 | 30 | 30      | 28.4099 | 30      | 18.1987 |
| S25 | Bmi1 | 30 | 30      | 30      | 30      | 16.9306 |
| S26 | Bmi1 | 30 | 30      | 15.2088 | 15.8234 | 18.7728 |
| S27 | Bmi1 | 30 | 17.9449 | 30      | 30      | 16.8489 |
| S37 | Bmi1 | 30 | 30      | 30      | 30      | 14.9592 |
| S38 | Bmi1 | 30 | 30      | 25.4904 | 30      | 18.2146 |
| S39 | Bmi1 | 30 | 30      | 30      | 30      | 17.3057 |
| S40 | Bmi1 | 30 | 30      | 13.8372 | 15.5894 | 17.7174 |
| S49 | Bmi1 | 30 | 30      | 30      | 30      | 16.4258 |
| S50 | Bmi1 | 30 | 30      | 16.3702 | 30      | 18.7257 |
| S51 | Bmi1 | 30 | 30      | 30      | 30      | 17.3347 |
| S52 | Bmi1 | 30 | 17.9963 | 30      | 30      | 16.3703 |

|     |      |    |         |         |         |         |
|-----|------|----|---------|---------|---------|---------|
| S61 | Bmi1 | 30 | 30      | 14.5784 | 16.1589 | 25.0071 |
| S62 | Bmi1 | 30 | 30      | 30      | 30      | 22.8083 |
| S63 | Bmi1 | 30 | 30      | 30      | 30      | 16.4075 |
| S64 | Bmi1 | 30 | 30      | 30      | 30      | 22.3954 |
| S73 | Bmi1 | 30 | 27.5242 | 15.4413 | 30      | 21.6617 |
| S74 | Bmi1 | 30 | 27.3638 | 30      | 30      | 21.1291 |
| S75 | Bmi1 | 30 | 26.5204 | 30      | 30      | 22.9005 |
| S76 | Bmi1 | 30 | 30      | 19.6394 | 30      | 19.2762 |
| S85 | Bmi1 | 30 | 25.9205 | 30      | 30      | 30      |
| S86 | Bmi1 | 30 | 30      | 30      | 30      | 17.3464 |
| S87 | Bmi1 | 30 | 19.7892 | 30      | 30      | 17.7781 |
| S88 | Bmi1 | 30 | 30      | 22.4434 | 30      | 16.4063 |

| <b>Atoh1_A61</b> | <b>Axin2_A73</b> | <b>Axin2_A85</b> | <b>Bmi1_A02</b> | <b>Bmi1_A14</b> | <b>Bmpr1a_A26</b> | <b>Bmpr1a_A38</b> |
|------------------|------------------|------------------|-----------------|-----------------|-------------------|-------------------|
| 21.9806          | 17.8491          | 30               | 18.7023         | 25.1726         | 18.2826           | 18.9653           |
| 30               | 14.6082          | 18.3228          | 18.9187         | 21.6927         | 18.1618           | 17.5383           |
| 18.518           | 16.7657          | 17.2291          | 17.3413         | 16.941          | 30                | 17.2339           |
| 17.9351          | 17.8248          | 19.0777          | 22.4043         | 18.5121         | 20.0981           | 17.431            |
| 17.5013          | 17.9497          | 21.6541          | 17.9036         | 20.8962         | 18.1974           | 17.8174           |
| 17.363           | 15.5522          | 20.6283          | 17.2192         | 17.1778         | 17.2004           | 17.3211           |
| 17.0361          | 30               | 30               | 18.071          | 15.6162         | 15.8673           | 16.0003           |
| 13.9443          | 11.201           | 13.4452          | 15.0644         | 14.6381         | 12.4171           | 13.6112           |
| 16.2304          | 16.3725          | 20.3429          | 17.2444         | 17.1932         | 30                | 16.5547           |
| 16.8978          | 17.8562          | 17.8106          | 17.3262         | 17.6983         | 16.936            | 16.2515           |
| 13.7016          | 12.6528          | 15.0055          | 16.5277         | 15.6293         | 16.0811           | 16.2118           |
| 30               | 14.8141          | 18.1962          | 22.4958         | 18.5956         | 30                | 19.1148           |
| 15.9804          | 17.1069          | 18.4154          | 16.6375         | 17.8569         | 18.6179           | 18.8845           |
| 30               | 18.1105          | 21.2552          | 17.6792         | 16.4372         | 14.2718           | 14.6898           |
| 16.7635          | 15.5091          | 18.0483          | 16.3244         | 17.827          | 16.7903           | 16.6333           |
| 14.6718          | 16.2573          | 19.5752          | 15.8641         | 19.7611         | 14.7517           | 15.1598           |
| 30               | 30               | 30               | 16.795          | 19.1609         | 30                | 30                |
| 30               | 15.0133          | 18.1892          | 16.838          | 17.6966         | 15.7152           | 15.0773           |
| 30               | 18.156           | 21.4992          | 21.8385         | 16.3437         | 16.4476           | 16.5439           |
| 16.5293          | 16.105           | 23.6253          | 16.9755         | 17.1585         | 30                | 16.7925           |
| 30               | 30               | 30               | 16.3843         | 16.0447         | 30                | 15.5849           |
| 17.0265          | 30               | 30               | 24.9715         | 17.8081         | 16.8443           | 21.5224           |
| 21.3391          | 12.7993          | 15.3701          | 15.9157         | 15.4644         | 14.6606           | 15.7782           |
| 24.4705          | 16.6362          | 20.205           | 16.6614         | 17.8223         | 17.0886           | 15.8726           |
| 19.165           | 16.2628          | 17.8789          | 16.3129         | 15.7871         | 15.3698           | 15.9484           |
| 30               | 16.3387          | 30               | 30              | 18.1802         | 18.443            | 17.4128           |
| 17.1807          | 16.8146          | 18.9701          | 19.3519         | 16.8309         | 30                | 30                |
| 30               | 30               | 30               | 30              | 30              | 25.2527           | 30                |
| 19.3088          | 19.6326          | 21.5491          | 30              | 30              | 30                | 20.1735           |
| 23.6631          | 24.3148          | 30               | 30              | 30              | 30                | 30                |
| 30               | 23.5218          | 30               | 24.0732         | 25.9688         | 24.7463           | 25.2752           |
| 17.8412          | 15.1745          | 30               | 16.8546         | 16.6373         | 14.671            | 15.033            |
| 19.3163          | 17.1241          | 19.9715          | 19.1836         | 30              | 18.5113           | 30                |
| 17.2241          | 15.0509          | 18.9272          | 15.9141         | 16.0763         | 14.3209           | 14.6923           |
| 30               | 16.6146          | 18.6858          | 19.0889         | 18.2129         | 16.6634           | 15.3804           |
| 30               | 17.5878          | 21.1307          | 16.4109         | 18.3634         | 19.8548           | 20.479            |
| 30               | 30               | 30               | 16.6811         | 16.9195         | 17.4947           | 19.5779           |
| 30               | 30               | 30               | 21.1861         | 21.3116         | 16.93             | 15.0961           |
| 18.1944          | 15.7443          | 20.1991          | 16.3896         | 16.9267         | 17.6165           | 17.58             |
| 16.1527          | 17.8889          | 30               | 17.5372         | 24.2579         | 17.474            | 30                |

|         |         |         |         |         |         |         |
|---------|---------|---------|---------|---------|---------|---------|
| 15.3986 | 12.8397 | 15.5266 | 15.0449 | 14.8974 | 14.0709 | 15.3125 |
| 17.8755 | 15.0182 | 17.0292 | 17.3247 | 18.3637 | 14.2588 | 14.4031 |
| 17.8398 | 16.1147 | 17.817  | 18.1119 | 21.7372 | 17.3114 | 16.9009 |
| 26.2567 | 30      | 30      | 17.6112 | 23.9599 | 16.8293 | 17.5419 |
| 30      | 15.6275 | 17.9595 | 18.5465 | 20.2272 | 23.7884 | 17.1159 |
| 16.8598 | 16.9154 | 18.6079 | 17.6331 | 17.5415 | 16.5388 | 16.8035 |
| 30      | 16.3626 | 18.0681 | 15.1569 | 13.7762 | 13.9473 | 14.134  |
| 17.4711 | 16.9729 | 21.165  | 30      | 15.9587 | 18.5133 | 16.6708 |
| 13.4249 | 15.4605 | 17.6339 | 17.7444 | 30      | 14.9241 | 14.0242 |
| 17.3331 | 15.6343 | 16.9277 | 18.6471 | 30      | 15.5137 | 30      |
| 16.3673 | 15.1639 | 18.5666 | 16.7032 | 17.2848 | 17.2227 | 30      |
| 18.6722 | 17.9505 | 19.1546 | 17.5466 | 16.8278 | 30      | 30      |
| 30      | 16.7993 | 19.5553 | 24.6645 | 23.7138 | 16.9371 | 16.318  |
| 18.2843 | 14.1948 | 15.6464 | 19.7876 | 18.3437 | 14.1131 | 14.6474 |
| 12.4193 | 18.2316 | 30      | 30      | 18.5463 | 17.4959 | 16.2891 |
| 13.5635 | 12.5706 | 14.9911 | 16.5752 | 17.6883 | 15.3359 | 16.956  |
| 30      | 17.6246 | 18.454  | 17.7449 | 17.2776 | 18.1164 | 16.3582 |
| 30      | 30      | 30      | 30      | 22.3398 | 16.7106 | 18.688  |
| 30      | 30      | 30      | 30      | 30      | 30      | 18.5982 |
| 20.1038 | 30      | 30      | 30      | 18.3779 | 17.4814 | 20.6735 |
| 24.258  | 24.4698 | 26.3445 | 26.5434 | 30      | 30      | 30      |
| 23.1485 | 30      | 27.7208 | 30      | 30      | 26.2782 | 26.3255 |
| 30      | 30      | 30      | 20.2762 | 17.3714 | 19.4252 | 18.1064 |
| 12.9317 | 15.6578 | 19.0646 | 15.704  | 16.5946 | 18.3856 | 16.5737 |
| 30      | 17.243  | 30      | 30      | 19.0943 | 16.0373 | 17.6423 |
| 16.3335 | 30      | 30      | 16.7951 | 15.9709 | 18.4001 | 30      |
| 16.425  | 18.0687 | 30      | 17.2754 | 16.823  | 17.4282 | 18.5651 |
| 17.1322 | 18.0376 | 30      | 17.0575 | 16.5758 | 30      | 18.6025 |
| 17.5998 | 11.3876 | 12.9087 | 13.4429 | 13.592  | 12.3419 | 12.7539 |
| 17.0481 | 30      | 30      | 17.0118 | 15.7997 | 30      | 18.2943 |
| 16.4985 | 14.8194 | 16.2513 | 17.6354 | 17.7027 | 17.4085 | 15.3709 |
| 21.0837 | 11.88   | 13.265  | 16.5363 | 14.5536 | 14.5724 | 14.3577 |
| 15.9788 | 26.0424 | 30      | 16.2479 | 16.0532 | 30      | 17.2755 |
| 13.8581 | 16.7021 | 18.1244 | 16.2889 | 16.5377 | 17.4986 | 18.6149 |
| 18.0496 | 14.5713 | 16.8416 | 17.8344 | 16.6468 | 14.8508 | 14.5873 |
| 17.6409 | 30      | 17.7913 | 18.8362 | 15.8411 | 28.2937 | 30      |
| 26.1846 | 11.7151 | 12.8871 | 14.9821 | 14.1406 | 13.8471 | 14.9453 |
| 16.538  | 30      | 30      | 17.458  | 15.0866 | 17.2429 | 17.7094 |
| 19.4756 | 13.656  | 14.7045 | 16.3205 | 15.8193 | 15.1205 | 15.576  |
| 30      | 18.2999 | 30      | 17.8253 | 17.7255 | 18.0494 | 18.4441 |
| 16.621  | 16.5346 | 30      | 17.1793 | 16.5654 | 16.5205 | 18.2318 |

|         |         |         |         |         |         |         |
|---------|---------|---------|---------|---------|---------|---------|
| 25.7827 | 12.7787 | 14.2015 | 16.6351 | 15.064  | 13.9731 | 15.0171 |
| 19.059  | 17.5735 | 17.198  | 17.4705 | 16.2589 | 30      | 16.5522 |
| 17.6927 | 17.8193 | 20.9417 | 17.4277 | 15.1415 | 16.1643 | 16.3341 |
| 25.7282 | 18.2843 | 30      | 17.6015 | 17.0453 | 17.8093 | 16.8424 |
| 19.4677 | 12.9368 | 14.7806 | 17.4984 | 14.5641 | 15.0997 | 14.8287 |
| 20.2426 | 30      | 30      | 30      | 18.5939 | 16.1488 | 16.7755 |
| 30      | 30      | 30      | 19.1078 | 17.3949 | 30      | 16.5986 |
| 21.6659 | 30      | 30      | 16.093  | 16.491  | 16.5892 | 16.7839 |
| 23.426  | 24.095  | 30      | 15.6291 | 18.1738 | 16.3729 | 15.0086 |
| 18.4275 | 30      | 30      | 30      | 30      | 30      | 30      |
| 16.7693 | 30      | 19.318  | 19.3879 | 15.4075 | 18.2571 | 18.7638 |
| 17.0489 | 30      | 30      | 16.1495 | 16.1593 | 15.8519 | 15.8846 |

| Ccnd1_A50 | Ccnd1_A62 | Cdkn1a_A74 | Cdkn1a_A86 | Cdx1_A03 | Cdx1_A15 | Chga_A27 |
|-----------|-----------|------------|------------|----------|----------|----------|
| 30        | 28.419    | 15.4984    | 17.4198    | 20.943   | 21.8718  | 30       |
| 30        | 30        | 17.843     | 18.4265    | 20.6125  | 20.9716  | 30       |
| 30        | 24.7207   | 14.9564    | 16.0172    | 20.4851  | 30       | 18.5862  |
| 30        | 30        | 15.3164    | 15.5534    | 23.8956  | 18.7143  | 30       |
| 30        | 27.0413   | 15.8392    | 16.789     | 23.4754  | 30       | 18.7257  |
| 30        | 28.4887   | 15.5716    | 16.769     | 20.5615  | 19.1885  | 30       |
| 30        | 24.1481   | 15.2221    | 14.8457    | 18.423   | 17.1818  | 30       |
| 13.7791   | 11.1912   | 15.5836    | 15.6366    | 15.3388  | 13.7383  | 18.6065  |
| 30        | 30        | 17.3524    | 17.3915    | 20.0507  | 18.3542  | 30       |
| 19.0076   | 17.3881   | 16.7645    | 19.5812    | 20.9007  | 17.4349  | 18.6781  |
| 17.3225   | 16.0684   | 16.8989    | 17.6618    | 17.6819  | 16.7672  | 30       |
| 30        | 17.9226   | 15.1691    | 15.8353    | 30       | 20.443   | 30       |
| 30        | 23.1329   | 16.8892    | 16.1867    | 23.0607  | 30       | 19.1343  |
| 30        | 30        | 13.7996    | 14.3417    | 19.1948  | 16.15    | 30       |
| 30        | 24.309    | 14.8993    | 15.5727    | 20.8287  | 19.512   | 15.327   |
| 30        | 30        | 30         | 30         | 19.0649  | 17.4122  | 30       |
| 30        | 18.5465   | 17.0937    | 17.3375    | 20.2439  | 20.8559  | 30       |
| 30        | 17.0315   | 14.0924    | 14.0751    | 22.9603  | 17.9084  | 16.9564  |
| 30        | 30        | 17.7532    | 16.4728    | 24.2573  | 18.2986  | 30       |
| 30        | 22.3959   | 15.3416    | 16.3641    | 20.8811  | 18.3699  | 17.5075  |
| 30        | 30        | 16.8789    | 15.6377    | 20.2769  | 18.6146  | 15.6784  |
| 30        | 18.4732   | 15.5744    | 16.1698    | 20.1557  | 19.206   | 18.342   |
| 16.4012   | 14.6317   | 30         | 30         | 18.1496  | 17.2972  | 17.756   |
| 30        | 30        | 14.7041    | 14.3675    | 20.2378  | 17.9758  | 30       |
| 30        | 30        | 15.2947    | 15.071     | 19.3149  | 17.9838  | 30       |
| 30        | 26.346    | 15.8865    | 16.2716    | 24.3753  | 19.6751  | 30       |
| 30        | 30        | 16.6478    | 16.976     | 30       | 30       | 30       |
| 24.5399   | 30        | 18.4167    | 15.9925    | 30       | 21.1874  | 25.3488  |
| 30        | 30        | 17.6566    | 17.3358    | 25.2225  | 20.9375  | 30       |
| 30        | 30        | 20.5434    | 17.715     | 30       | 23.0878  | 30       |
| 25.0828   | 17.3993   | 19.6217    | 14.8805    | 30       | 22.8887  | 23.491   |
| 30        | 17.6215   | 15.2835    | 14.8056    | 20.7104  | 18.3658  | 30       |
| 30        | 30        | 15.0118    | 15.5692    | 24.0535  | 24.9458  | 18.8499  |
| 30        | 30        | 14.7585    | 14.6648    | 20.5425  | 17.6062  | 30       |
| 20.0621   | 17.1353   | 15.3701    | 15.3976    | 21.4419  | 19.9     | 30       |
| 30        | 30        | 16.4854    | 17.8588    | 20.9501  | 24.9146  | 30       |
| 30        | 24.3408   | 15.7034    | 16.7297    | 21.3038  | 19.1191  | 30       |
| 30        | 30        | 14.7133    | 19.228     | 23.075   | 19.0818  | 30       |
| 23.1537   | 16.9013   | 14.474     | 17.6629    | 22.6586  | 28.014   | 30       |
| 30        | 30        | 16.4274    | 17.6408    | 21.3779  | 21.3514  | 17.5966  |

|         |         |         |         |         |         |         |
|---------|---------|---------|---------|---------|---------|---------|
| 16.3913 | 13.7184 | 30      | 19.0255 | 18.1095 | 16.7392 | 30      |
| 30      | 23.6741 | 14.9579 | 15.13   | 19.0518 | 17.1474 | 30      |
| 19.6998 | 17.2977 | 14.4582 | 15.319  | 22.8657 | 21.3061 | 30      |
| 30      | 30      | 16.5537 | 16.3467 | 22.1277 | 24.7862 | 30      |
| 30      | 30      | 14.6614 | 15.8335 | 21.8857 | 22.3878 | 30      |
| 30      | 30      | 15.7282 | 18.1869 | 21.6633 | 18.3209 | 30      |
| 22.5608 | 17.2271 | 14.0226 | 14.4755 | 19.0162 | 16.0647 | 30      |
| 30      | 30      | 14.3385 | 14.91   | 20.2285 | 17.9755 | 30      |
| 16.7411 | 13.0357 | 16.9592 | 17.4834 | 18.4477 | 16.7479 | 30      |
| 30      | 30      | 15.6527 | 17.2335 | 21.1908 | 19.5896 | 30      |
| 20.227  | 30      | 16.6417 | 17.7752 | 22.604  | 18.7316 | 30      |
| 30      | 30      | 16.1487 | 16.9692 | 24.121  | 20.2968 | 30      |
| 18.4839 | 15.7911 | 15.6899 | 16.3361 | 23.617  | 22.8031 | 30      |
| 30      | 25.7842 | 13.9473 | 14.6341 | 20.0624 | 18.0538 | 30      |
| 30      | 30      | 14.303  | 15.1384 | 19.1186 | 19.7198 | 30      |
| 19.3621 | 15.2868 | 16.9834 | 16.7097 | 19.8434 | 17.4774 | 30      |
| 30      | 23.3758 | 16.228  | 15.5848 | 22.2104 | 20.1294 | 30      |
| 30      | 25.0217 | 15.86   | 16.4516 | 21.773  | 21.4789 | 30      |
| 30      | 30      | 19.7934 | 19.8185 | 30      | 30      | 30      |
| 30      | 30      | 16.2165 | 15.3143 | 22.8778 | 27.8413 | 30      |
| 30      | 16.8619 | 30      | 23.2145 | 30      | 24.2325 | 30      |
| 30      | 21.3969 | 22.4793 | 19.4342 | 30      | 26.2667 | 30      |
| 30      | 30      | 13.5013 | 13.9122 | 20.9802 | 22.5075 | 30      |
| 30      | 22.7946 | 14.4065 | 14.925  | 18.1914 | 20.1257 | 30      |
| 30      | 28.8823 | 14.0264 | 14.9702 | 22.0337 | 21.9683 | 30      |
| 19.4636 | 27.4759 | 15.7263 | 16.78   | 22.4279 | 30      | 30      |
| 19.9626 | 30      | 15.0205 | 17.2581 | 20.0188 | 22.6339 | 30      |
| 30      | 22.5868 | 30      | 27.1797 | 30      | 23.7671 | 30      |
| 14.6114 | 12.0073 | 22.6495 | 30      | 15.2708 | 15.9043 | 30      |
| 30      | 24.9358 | 16.3883 | 16.8487 | 22.834  | 21.0198 | 30      |
| 30      | 21.7014 | 13.7021 | 15.6678 | 19.5589 | 23.4431 | 30      |
| 15.5888 | 12.7478 | 18.1374 | 20.9443 | 16.8846 | 17.6212 | 30      |
| 30      | 25.6582 | 15.953  | 16.8016 | 23.3435 | 23.9278 | 30      |
| 30      | 16.3231 | 16.9831 | 16.9119 | 19.638  | 19.4085 | 30      |
| 17.628  | 16.162  | 15.676  | 16.0447 | 17.453  | 17.5338 | 30      |
| 30      | 30      | 30      | 27.6412 | 30      | 30      | 30      |
| 14.6522 | 12.0068 | 19.124  | 24.808  | 16.6418 | 16.8073 | 30      |
| 30      | 30      | 17.418  | 17.0772 | 22.725  | 21.5203 | 30      |
| 19.3129 | 16.6809 | 30      | 20.9682 | 17.369  | 18.3806 | 30      |
| 30      | 17.9661 | 15.5182 | 17.026  | 21.2068 | 23.1965 | 30      |
| 30      | 24.0483 | 16.1829 | 19.0094 | 25.4062 | 23.2228 | 15.5032 |

|         |         |         |         |         |         |         |
|---------|---------|---------|---------|---------|---------|---------|
| 16.4857 | 13.3474 | 30      | 30      | 17.6123 | 19.0467 | 30      |
| 30      | 24.8857 | 15.4134 | 16.1901 | 17.9284 | 19.0889 | 7.48831 |
| 30      | 24.2023 | 14.567  | 16.0934 | 18.3847 | 19.0925 | 26.4565 |
| 30      | 30      | 17.4418 | 18.4332 | 21.4697 | 30      | 30      |
| 16.7611 | 14.2472 | 17.6917 | 17.1687 | 16.8279 | 18.8002 | 30      |
| 30      | 27.7222 | 16.2221 | 16.466  | 21.2357 | 30      | 18.8513 |
| 30      | 30      | 17.2062 | 30      | 24.8942 | 22.223  | 30      |
| 30      | 19.0985 | 13.9614 | 14.66   | 18.0967 | 19.9068 | 30      |
| 30      | 30      | 13.1849 | 13.8894 | 19.5882 | 24.1312 | 7.38562 |
| 30      | 30      | 27.7574 | 19.8689 | 30      | 30      | 30      |
| 30      | 28.0943 | 16.8093 | 17.0903 | 19.821  | 24.6555 | 30      |
| 30      | 23.6307 | 14.1407 | 14.8459 | 21.318  | 22.2287 | 30      |



| Chga_A39 | Cubn_A51 | Cubn_A63 | DII4_A75 | DII4_A87 | Dvl2_A04 | Dvl2_A16 |
|----------|----------|----------|----------|----------|----------|----------|
| 18.0647  | 14.4539  | 12.3677  | 30       | 18.873   | 19.2824  | 30       |
| 30       | 13.9393  | 12.8679  | 18.8796  | 16.9073  | 30       | 30       |
| 30       | 14.9743  | 14.8498  | 30       | 30       | 30       | 30       |
| 30       | 16.9225  | 18.4715  | 30       | 30       | 21.8675  | 30       |
| 30       | 13.6785  | 11.6812  | 30       | 30       | 24.0842  | 16.9745  |
| 30       | 15.2546  | 14.7329  | 30       | 30       | 17.4606  | 18.164   |
| 30       | 17.0371  | 16.4083  | 17.8387  | 18.0229  | 19.1032  | 17.0079  |
| 17.1593  | 30       | 18.2899  | 14.4545  | 14.3471  | 16.2207  | 15.8481  |
| 30       | 15.6873  | 16.5879  | 18.5881  | 30       | 30       | 30       |
| 18.022   | 18.406   | 30       | 30       | 30       | 30       | 20.6775  |
| 30       | 30       | 30       | 17.2826  | 16.3008  | 17.1438  | 18.7838  |
| 19.0463  | 14.5054  | 14.5412  | 30       | 18.1598  | 18.5747  | 30       |
| 30       | 30       | 16.1091  | 30       | 30       | 17.3338  | 21.7713  |
| 30       | 17.4193  | 30       | 18.7591  | 18.4415  | 20.2252  | 16.9468  |
| 30       | 14.613   | 15.0191  | 30       | 30       | 22.0378  | 18.4063  |
| 30       | 30       | 30       | 17.5649  | 16.3674  | 18.7718  | 30       |
| 30       | 15.0158  | 13.9772  | 30       | 30       | 30       | 30       |
| 30       | 12.2738  | 12.8442  | 17.5269  | 16.3743  | 30       | 30       |
| 30       | 15.3866  | 13.4591  | 19.0312  | 19.1658  | 21.5375  | 16.7951  |
| 30       | 14.4092  | 13.0956  | 17.7724  | 19.9377  | 30       | 30       |
| 30       | 13.8462  | 13.5855  | 18.091   | 18.1273  | 30       | 24.2291  |
| 30       | 14.5834  | 14.9938  | 17.9093  | 19.9484  | 19.1066  | 16.7416  |
| 17.5185  | 18.5297  | 30       | 17.5972  | 19.1204  | 19.9686  | 23.112   |
| 30       | 13.8731  | 13.4051  | 30       | 16.7874  | 30       | 18.6343  |
| 30       | 13.8223  | 13.3454  | 18.0956  | 30       | 30       | 30       |
| 24.4395  | 14.5663  | 13.7042  | 30       | 30       | 23.5561  | 30       |
| 30       | 19.9582  | 30       | 30       | 30       | 30       | 23.421   |
| 30       | 18.4967  | 19.8573  | 20.0652  | 30       | 30       | 30       |
| 30       | 16.506   | 18.0535  | 30       | 20.3138  | 30       | 30       |
| 30       | 18.2092  | 17.5374  | 30       | 25.216   | 24.8396  | 25.8523  |
| 30       | 14.9144  | 16.2958  | 18.9247  | 24.2638  | 24.2207  | 17.9102  |
| 30       | 18.6506  | 18.5656  | 18.7865  | 19.1251  | 17.3763  | 17.4254  |
| 30       | 16.846   | 15.8794  | 30       | 30       | 18.0072  | 30       |
| 30       | 13.0083  | 12.5117  | 30       | 24.6992  | 20.6559  | 18.0788  |
| 19.3932  | 16.3667  | 18.4464  | 18.7273  | 30       | 30       | 16.3771  |
| 30       | 30       | 30       | 17.6314  | 17.9698  | 18.8084  | 23.6749  |
| 30       | 12.924   | 12.8954  | 30       | 19.0549  | 30       | 30       |
| 30       | 14.5645  | 13.2329  | 30       | 30       | 17.7979  | 16.9016  |
| 30       | 15.104   | 17.1412  | 30       | 30       | 17.6288  | 30       |
| 30       | 14.7998  | 15.6639  | 30       | 18.5928  | 30       | 17.8468  |

|         |         |         |         |         |         |         |
|---------|---------|---------|---------|---------|---------|---------|
| 30      | 30      | 18.4537 | 30      | 30      | 18.718  | 30      |
| 30      | 11.3051 | 11.5382 | 16.3679 | 16.7386 | 30      | 17.1192 |
| 30      | 13.4336 | 12.7505 | 16.5195 | 18.0827 | 30      | 30      |
| 17.6446 | 18.7551 | 18.5074 | 30      | 30      | 30      | 17.5541 |
| 30      | 14.6728 | 15.0018 | 30      | 30      | 21.3733 | 30      |
| 30      | 14.2009 | 12.4368 | 30      | 18.4243 | 17.6085 | 22.8734 |
| 30      | 12.7032 | 11.4889 | 17.5907 | 16.9438 | 17.72   | 17.6754 |
| 30      | 14.9137 | 15.3984 | 18.92   | 30      | 19.2248 | 18.3308 |
| 30      | 18.7371 | 30      | 18.9713 | 19.1779 | 19.6046 | 16.1602 |
| 30      | 16.0756 | 14.183  | 30      | 25.3337 | 30      | 17.9949 |
| 30      | 15.2784 | 14.9479 | 30      | 30      | 18.5908 | 17.9091 |
| 30      | 14.9715 | 14.2317 | 17.9946 | 30      | 16.9879 | 16.0699 |
| 30      | 30      | 16.3071 | 18.859  | 19.0315 | 18.5522 | 23.6196 |
| 30      | 13.7632 | 14.6848 | 30      | 30      | 21.5432 | 17.7034 |
| 30      | 30      | 30      | 17.9837 | 17.3124 | 30      | 17.6758 |
| 30      | 18.6747 | 30      | 30      | 19.4314 | 30      | 17.4103 |
| 30      | 15.2037 | 13.9512 | 17.9487 | 17.8787 | 18.6696 | 18.8847 |
| 30      | 30      | 17.6469 | 30      | 30      | 21.6838 | 17.5621 |
| 30      | 30      | 30      | 30      | 30      | 30      | 30      |
| 30      | 14.3981 | 13.9722 | 19.2768 | 30      | 24.5993 | 30      |
| 30      | 30      | 30      | 19.825  | 30      | 30      | 18.5571 |
| 30      | 21.4523 | 22.5569 | 21.7822 | 26.4352 | 30      | 30      |
| 30      | 30      | 30      | 18.4442 | 30      | 30      | 30      |
| 30      | 30      | 30      | 30      | 16.0767 | 15.7656 | 15.9364 |
| 30      | 30      | 13.0689 | 13.0162 | 30      | 30      | 20.8167 |
| 30      | 30      | 30      | 30      | 18.457  | 30      | 30      |
| 30      | 17.6758 | 15.4693 | 14.6821 | 16.4302 | 17.9552 | 30      |
| 22.336  | 30      | 18.7974 | 25.2228 | 30      | 30      | 16.9702 |
| 30      | 15.2473 | 30      | 26.0862 | 17.5591 | 17.4263 | 16.7397 |
| 30      | 18.69   | 30      | 30      | 17.8981 | 19.1168 | 17.2801 |
| 30      | 30      | 14.929  | 12.9152 | 18.1547 | 20.0694 | 22.5896 |
| 30      | 16.5269 | 26.8088 | 26.7319 | 17.942  | 20.9749 | 16.1644 |
| 30      | 17.6231 | 30      | 28.2053 | 18.6142 | 18.1867 | 18.689  |
| 30      | 19.3603 | 30      | 30      | 16.6924 | 17.1658 | 18.7242 |
| 30      | 23.1615 | 30      | 30      | 30      | 30      | 17.6877 |
| 30      | 17.4088 | 30      | 30      | 30      | 30      | 17.4035 |
| 19.7409 | 16.4477 | 30      | 30      | 17.4472 | 18.2876 | 18.7375 |
| 30      | 30      | 17.778  | 30      | 30      | 19.3867 | 16.4397 |
| 30      | 18.2346 | 30      | 30      | 30      | 30      | 30      |
| 30      | 24.1608 | 30      | 30      | 30      | 30      | 30      |
| 30      | 17.7793 | 18.7531 | 18.4491 | 30      | 30      | 17.4016 |

|         |         |         |         |         |         |         |
|---------|---------|---------|---------|---------|---------|---------|
| 30      | 19.2607 | 30      | 30      | 30      | 30      | 18.0366 |
| 8.17044 | 30      | 30      | 30      | 30      | 16.9863 | 16.8889 |
| 30      | 30      | 17.7477 | 30      | 24.1437 | 30      | 20.7274 |
| 30      | 26.9807 | 18.5216 | 15.2782 | 17.7398 | 30      | 30      |
| 30      | 18.3466 | 30      | 30      | 30      | 30      | 16.3002 |
| 30      | 30      | 15.9171 | 16.9816 | 18.2264 | 17.6008 | 30      |
| 30      | 22.0281 | 30      | 30      | 30      | 30      | 30      |
| 30      | 30      | 30      | 23.301  | 30      | 30      | 18.4054 |
| 7.26587 | 30      | 18.9495 | 30      | 15.406  | 15.1981 | 30      |
| 30      | 30      | 30      | 30      | 30      | 30      | 30      |
| 30      | 17.7787 | 30      | 30      | 17.5383 | 19.4943 | 19.6412 |
| 30      | 18.5884 | 15.3335 | 18.6778 | 18.7306 | 30      | 17.0816 |

| Efnb1_A28 | Efnb1_A40 | Epas1_A52 | Epas1_A64 | Ephb2_A76 | Ephb2_A88 | Ereg_A05 |
|-----------|-----------|-----------|-----------|-----------|-----------|----------|
| 18.2305   | 19.9465   | 17.9761   | 17.2567   | 16.8485   | 30        | 30       |
| 16.4037   | 18.1462   | 16.3532   | 16.4395   | 17.5991   | 19.6077   | 30       |
| 17.8908   | 17.563    | 15.5078   | 17.6948   | 16.0988   | 30        | 30       |
| 16.6009   | 18.4385   | 16.4311   | 17.7938   | 22.8905   | 30        | 30       |
| 16.6164   | 16.551    | 16.959    | 18.6211   | 22.8211   | 30        | 30       |
| 30        | 18.7631   | 17.8013   | 30        | 15.6236   | 30        | 30       |
| 13.986    | 14.5539   | 19.0986   | 19.0273   | 25.7859   | 30        | 30       |
| 12.6805   | 13.964    | 17.1118   | 16.8542   | 12.0385   | 13.7316   | 30       |
| 15.6457   | 17.5705   | 16.1992   | 15.6204   | 21.6201   | 30        | 30       |
| 16.7452   | 17.4897   | 30        | 30        | 19.739    | 30        | 30       |
| 16.8193   | 16.6562   | 17.9722   | 30        | 15.4491   | 17.2744   | 30       |
| 16.82     | 30        | 17.4099   | 30        | 24.0146   | 30        | 30       |
| 17.1737   | 16.6189   | 18.9195   | 30        | 20.1397   | 30        | 30       |
| 15.4758   | 17.3667   | 14.8586   | 13.7543   | 14.6713   | 30        | 30       |
| 15.4543   | 17.013    | 16.9847   | 16.7487   | 21.6461   | 30        | 30       |
| 30        | 17.641    | 16.8309   | 18.9348   | 14.8942   | 18.0284   | 30       |
| 15.7274   | 15.9205   | 18.4806   | 19.9369   | 15.8613   | 30        | 30       |
| 14.3165   | 14.6545   | 18.0647   | 15.6081   | 14.1681   | 30        | 17.8214  |
| 15.3408   | 16.6501   | 18.8469   | 18.7246   | 15.6259   | 30        | 30       |
| 16.6116   | 16.2217   | 17.7058   | 18.7004   | 18.2377   | 30        | 30       |
| 14.6826   | 15.6241   | 18.1499   | 18.898    | 16.4268   | 30        | 30       |
| 30        | 30        | 17.2068   | 22.7674   | 13.6789   | 30        | 30       |
| 15.2576   | 15.5799   | 17.3825   | 16.5787   | 13.1201   | 15.2408   | 30       |
| 14.5985   | 15.3283   | 15.4941   | 15.2398   | 21.3324   | 30        | 30       |
| 13.8095   | 14.9978   | 14.8961   | 15.6679   | 14.806    | 30        | 30       |
| 16.636    | 18.3173   | 17.8122   | 30        | 15.8554   | 30        | 30       |
| 15.6674   | 14.9728   | 18.1674   | 18.8256   | 30        | 20.0382   | 30       |
| 16.3803   | 30        | 16.5751   | 21.2562   | 18.0247   | 30        | 30       |
| 17.966    | 23.639    | 30        | 18.2576   | 17.0601   | 30        | 30       |
| 18.8219   | 22.0508   | 30        | 22.908    | 14.5873   | 30        | 30       |
| 15.2512   | 20.3965   | 16.6766   | 21.7823   | 14.9475   | 30        | 30       |
| 14.2992   | 15.1085   | 14.5651   | 14.1321   | 16.9354   | 21.3116   | 30       |
| 16.0259   | 16.426    | 19.3654   | 17.9931   | 16.9019   | 18.8926   | 30       |
| 15.1625   | 16.5858   | 14.8215   | 15.0794   | 15.508    | 19.1145   | 30       |
| 15.9056   | 16.3937   | 16.4174   | 17.2688   | 16.578    | 30        | 30       |
| 18.3251   | 30        | 16.7014   | 18.1191   | 15.5707   | 25.1816   | 30       |
| 15.1633   | 17.4024   | 16.0496   | 17.7099   | 17.006    | 20.0481   | 30       |
| 15.6492   | 15.8782   | 17.3327   | 30        | 15.4955   | 30        | 30       |
| 16.8596   | 17.5466   | 17.3015   | 16.8827   | 15.4331   | 30        | 30       |
| 21.344    | 17.3507   | 18.0641   | 17.6596   | 15.4359   | 30        | 30       |

|         |         |         |         |         |         |         |
|---------|---------|---------|---------|---------|---------|---------|
| 16.786  | 16.9387 | 20.0043 | 18.6661 | 13.056  | 15.7212 | 30      |
| 13.8736 | 15.3249 | 15.0235 | 14.9515 | 16.1363 | 28.2174 | 30      |
| 16.4119 | 30      | 30      | 17.6618 | 15.2944 | 30      | 30      |
| 17.2697 | 18.3942 | 18.4067 | 30      | 13.7902 | 30      | 30      |
| 15.9546 | 15.6353 | 17.5214 | 19.9733 | 15.6894 | 30      | 30      |
| 16.6108 | 17.8244 | 16.6659 | 18.5455 | 16.0418 | 30      | 30      |
| 13.4134 | 15.4829 | 16.3275 | 15.2788 | 16.7156 | 18.5579 | 30      |
| 15.7964 | 16.7861 | 30      | 30      | 17.3576 | 30      | 17.1804 |
| 16.8071 | 15.1821 | 16.0756 | 16.685  | 14.314  | 18.2152 | 30      |
| 16.4458 | 18.9368 | 17.4512 | 30      | 15.8217 | 30      | 30      |
| 17.0289 | 15.9713 | 16.4024 | 18.2636 | 16.2621 | 19.8818 | 30      |
| 15.6383 | 18.8692 | 17.5863 | 17.2282 | 14.7641 | 30      | 30      |
| 15.1199 | 19.2137 | 30      | 30      | 17.2489 | 30      | 30      |
| 14.9958 | 15.9247 | 16.3141 | 16.0031 | 15.117  | 30      | 30      |
| 15.5835 | 15.7894 | 17.0424 | 17.3856 | 14.3175 | 19.967  | 30      |
| 17.1856 | 17.1785 | 17.7769 | 19.051  | 15.5899 | 17.9594 | 30      |
| 16.6023 | 17.3932 | 18.5722 | 17.5208 | 16.2595 | 30      | 30      |
| 18.2324 | 18.5878 | 19.3758 | 18.8169 | 30      | 30      | 30      |
| 16.643  | 19.9656 | 30      | 30      | 17.3566 | 30      | 30      |
| 15.1648 | 17.5849 | 20.2513 | 30      | 14.9106 | 30      | 30      |
| 18.3536 | 26.1378 | 30      | 30      | 18.249  | 17.6645 | 30      |
| 20.6377 | 30      | 17.6865 | 25.0495 | 27.5906 | 30      | 30      |
| 30      | 15.3321 | 14.9894 | 18.0591 | 16.8608 | 24.8437 | 30      |
| 16.9501 | 18.567  | 17.3787 | 21.6956 | 19.5657 | 17.2002 | 19.2439 |
| 25.682  | 17.4838 | 15.8692 | 15.8936 | 15.3821 | 17.8161 | 30      |
| 16.5944 | 30      | 16.7507 | 18.3874 | 17.8411 | 16.5397 | 30      |
| 17.7452 | 16.6782 | 15.1155 | 16.7978 | 16.6485 | 23.3648 | 21.0117 |
| 16.792  | 18.3807 | 30      | 30      | 30      | 16.2633 | 18.7785 |
| 16.5309 | 14.021  | 15.2833 | 19.352  | 18.9154 | 12.7746 | 14.6277 |
| 18.42   | 17.3241 | 16.1752 | 19.6397 | 30      | 17.1554 | 27.3479 |
| 17.0635 | 15.8305 | 14.9873 | 16.5368 | 17.6397 | 28.4293 | 30      |
| 16.9798 | 15.1405 | 15.6783 | 18.45   | 17.3112 | 14.2408 | 15.8924 |
| 20.8228 | 16.4749 | 15.2943 | 18.8483 | 20.4953 | 16.3539 | 30      |
| 18.8471 | 16.0674 | 16.6534 | 17.8292 | 25.6173 | 17.3897 | 18.893  |
| 17.7455 | 14.211  | 14.9169 | 15.9425 | 16.156  | 13.2663 | 20.6588 |
| 18.7038 | 18.402  | 23.0621 | 30      | 30      | 14.9651 | 30      |
| 16.4229 | 15.0264 | 15.5183 | 17.7022 | 30      | 12.5966 | 15.5411 |
| 15.5096 | 15.8427 | 15.6851 | 17.8757 | 18.0707 | 23.8061 | 30      |
| 16.9078 | 16.7107 | 17.8203 | 16.9654 | 18.0978 | 15.728  | 17.3012 |
| 30      | 16.3843 | 16.5079 | 30      | 18.6273 | 25.0153 | 30      |
| 15.9991 | 17.1086 | 15.769  | 18.3765 | 22.7694 | 18.3429 | 30      |

|         |         |         |         |         |         |         |
|---------|---------|---------|---------|---------|---------|---------|
| 18.5129 | 15.2467 | 16.2954 | 18.4665 | 17.6828 | 14.7142 | 16.6519 |
| 30      | 14.9766 | 15.6159 | 30      | 30      | 19.2089 | 30      |
| 17.2419 | 15.558  | 14.8212 | 16.9812 | 16.7607 | 16.6199 | 30      |
| 30      | 17.8343 | 17.317  | 18.0668 | 17.5304 | 19.0796 | 20.7076 |
| 17.4545 | 15.4543 | 16.8117 | 30      | 30      | 14.6458 | 17.9714 |
| 18.6106 | 16.5242 | 17.3375 | 17.2473 | 30      | 18.1807 | 20.4682 |
| 18.432  | 19.3317 | 18.8362 | 19.3551 | 30      | 23.0796 | 30      |
| 15.7852 | 15.4409 | 15.2957 | 17.8696 | 30      | 14.7779 | 17.7965 |
| 17.0363 | 16.6691 | 15.601  | 30      | 27.5891 | 26.2742 | 30      |
| 30      | 30      | 30      | 30      | 30      | 19.9314 | 30      |
| 17.8081 | 18.4297 | 16.8959 | 16.7352 | 17.177  | 20.3209 | 30      |
| 16.0279 | 14.6506 | 14.9373 | 17.0815 | 17.4606 | 18.1481 | 30      |

| Ereg_A17 | Fut2_A29 | Fut2_A41 | Gapdh_A53 | Gapdh_A65 | Gsk3b_A77 | Gsk3b_A89 |
|----------|----------|----------|-----------|-----------|-----------|-----------|
| 30       | 30       | 30       | 11.1998   | 11.1514   | 17.1767   | 18.0409   |
| 30       | 30       | 30       | 10.7662   | 10.775    | 16.1103   | 16.7996   |
| 30       | 30       | 30       | 10.7225   | 10.7336   | 15.9823   | 17.1765   |
| 30       | 30       | 17.4314  | 10.5561   | 10.6418   | 18.6186   | 19.0185   |
| 30       | 30       | 19.2872  | 10.7734   | 10.7611   | 18.3403   | 30        |
| 30       | 30       | 17.3318  | 11.8267   | 11.8067   | 30        | 17.9936   |
| 30       | 30       | 19.2872  | 9.01425   | 8.95993   | 15.7181   | 15.1328   |
| 30       | 30       | 30       | 8.3401    | 8.2624    | 13.6101   | 13.3753   |
| 30       | 30       | 17.1605  | 10.7543   | 10.3625   | 18.0646   | 16.5167   |
| 30       | 30       | 18.3024  | 11.8821   | 11.8058   | 17.3078   | 19.9404   |
| 30       | 30       | 24.534   | 11.2834   | 11.256    | 14.8027   | 19.1986   |
| 30       | 30       | 16.9161  | 11.6634   | 11.5535   | 18.2761   | 18.913    |
| 30       | 30       | 17.1215  | 10.9418   | 10.9528   | 30        | 16.7225   |
| 30       | 30       | 30       | 8.55331   | 8.54529   | 16.7888   | 15.5618   |
| 30       | 18.7818  | 16.8715  | 10.5851   | 10.5535   | 14.2233   | 17.2856   |
| 30       | 30       | 30       | 12.4092   | 13.0322   | 16.4129   | 15.9435   |
| 30       | 30       | 18.9527  | 12.0186   | 12.2593   | 18.565    | 16.8468   |
| 30       | 30       | 20.3503  | 9.4919    | 9.82128   | 15.642    | 16.1602   |
| 30       | 30       | 18.3454  | 10.9314   | 11.1326   | 30        | 17.1949   |
| 30       | 30       | 30       | 11.1923   | 11.3713   | 30        | 16.6544   |
| 30       | 30       | 23.925   | 10.3454   | 10.4619   | 16.774    | 17.6879   |
| 30       | 30       | 21.9904  | 10.2058   | 10.5273   | 19.1677   | 16.4275   |
| 30       | 30       | 18.8684  | 10.3548   | 10.5326   | 14.6784   | 14.3323   |
| 30       | 30       | 26.4652  | 8.64743   | 8.75629   | 14.7954   | 15.1816   |
| 30       | 30       | 20.031   | 8.32517   | 8.59404   | 15.6236   | 14.7607   |
| 30       | 30       | 17.9923  | 12.3308   | 12.3106   | 17.4269   | 17.1601   |
| 30       | 30       | 30       | 11.9553   | 12.096    | 16.9089   | 17.3839   |
| 30       | 30       | 20.3762  | 10.7853   | 10.7981   | 18.5144   | 18.7982   |
| 30       | 30       | 17.6928  | 12.396    | 12.479    | 18.6885   | 17.3598   |
| 30       | 30       | 21.6271  | 12.7137   | 12.7658   | 15.4961   | 18.9348   |
| 30       | 30       | 25.1937  | 10.9855   | 11.1982   | 17.5522   | 17.5627   |
| 30       | 30       | 24.0628  | 8.59199   | 8.5366    | 15.5395   | 15.3249   |
| 30       | 30       | 18.1694  | 11.1646   | 11.1197   | 17.2652   | 16.1749   |
| 30       | 18.5781  | 30       | 8.53594   | 8.48      | 14.0635   | 15.1223   |
| 30       | 30       | 19.0252  | 9.89617   | 9.88193   | 18.2184   | 16.2093   |
| 30       | 30       | 19.3123  | 11.5932   | 11.585    | 17.3508   | 16.206    |
| 30       | 30       | 17.8358  | 10.3683   | 10.3902   | 17.2035   | 17.2391   |
| 30       | 30       | 17.0187  | 10.9326   | 10.9346   | 15.6524   | 16.08     |
| 30       | 30       | 15.5553  | 11.1135   | 11.0455   | 14.9979   | 16.1378   |
| 30       | 30       | 17.6459  | 10.9466   | 10.938    | 30        | 17.5328   |

|         |         |         |         |         |         |         |
|---------|---------|---------|---------|---------|---------|---------|
| 30      | 30      | 18.6743 | 9.68715 | 9.64297 | 15.0409 | 15.3259 |
| 30      | 30      | 18.4157 | 8.41247 | 8.39522 | 15.3654 | 14.9855 |
| 30      | 30      | 30      | 11.2736 | 11.2274 | 17.568  | 15.8811 |
| 30      | 30      | 23.1741 | 10.4124 | 10.3309 | 16.2034 | 19.4653 |
| 30      | 30      | 17.7832 | 10.4722 | 10.4029 | 17.3989 | 16.1359 |
| 30      | 30      | 20.342  | 9.86204 | 9.79035 | 30      | 30      |
| 30      | 30      | 17.3923 | 8.93376 | 8.90064 | 14.6057 | 14.5271 |
| 17.7075 | 30      | 18.2532 | 10.0216 | 10.166  | 16.3309 | 16.5709 |
| 30      | 30      | 16.4024 | 10.3616 | 10.5912 | 14.7505 | 16.2776 |
| 30      | 30      | 25.1693 | 11.2289 | 11.3382 | 19.3783 | 17.513  |
| 30      | 30      | 18.1436 | 11.3592 | 11.4437 | 17.5135 | 17.7385 |
| 30      | 30      | 21.1674 | 11.1096 | 11.2195 | 16.9982 | 16.6639 |
| 30      | 30      | 18.0311 | 11.0732 | 11.187  | 16.5805 | 30      |
| 30      | 30      | 17.9689 | 9.22757 | 9.3857  | 15.0182 | 15.1004 |
| 30      | 30      | 30      | 11.4146 | 11.5347 | 18.1669 | 16.4806 |
| 30      | 30      | 19.3397 | 11.3865 | 11.4316 | 17.3034 | 17.1076 |
| 30      | 30      | 17.5209 | 10.3332 | 10.4065 | 18.5541 | 15.9689 |
| 30      | 30      | 30      | 11.2445 | 11.2362 | 17.3795 | 18.6743 |
| 30      | 30      | 30      | 13.2725 | 13.3088 | 30      | 30      |
| 30      | 30      | 17.4892 | 11.6986 | 11.693  | 17.7203 | 17.7654 |
| 30      | 30      | 30      | 13.2128 | 13.25   | 21.2457 | 22.5254 |
| 30      | 30      | 24.5457 | 13.8487 | 13.9053 | 20.7845 | 22.167  |
| 30      | 30      | 30      | 18.3627 | 10.5984 | 10.6043 | 16.4649 |
| 30      | 30      | 30      | 18.3602 | 11.9861 | 11.9628 | 15.9503 |
| 30      | 30      | 30      | 17.8577 | 10.3951 | 10.3919 | 15.0273 |
| 30      | 30      | 30      | 16.1679 | 11.0543 | 11.0401 | 26.61   |
| 30      | 30      | 30      | 16.4417 | 10.5194 | 10.5071 | 16.1612 |
| 30      | 30      | 30      | 18.5173 | 12.0221 | 11.9509 | 16.8491 |
| 30      | 30      | 30      | 16.44   | 8.89469 | 8.89095 | 13.3488 |
| 30      | 30      | 30      | 16.7653 | 11.307  | 11.2913 | 30      |
| 30      | 30      | 30      | 26.8203 | 10.5838 | 10.5361 | 15.7969 |
| 30      | 28.3806 | 30      | 21.767  | 10.3634 | 10.3521 | 14.2128 |
| 26.9781 | 28.5323 | 30      | 18.2204 | 10.6676 | 10.6492 | 18.1315 |
| 30      | 30      | 30      | 30      | 12.4634 | 12.4534 | 17.1915 |
| 30      | 30      | 30      | 30      | 10.0305 | 9.99766 | 15.5918 |
| 30      | 30      | 30      | 16.7347 | 11.9882 | 11.9582 | 16.8421 |
| 30      | 30      | 30      | 20.5135 | 10.1416 | 10.1332 | 14.1361 |
| 30      | 30      | 30      | 16.2871 | 10.6624 | 10.7969 | 18.7945 |
| 30      | 30      | 30      | 16.3823 | 11.2315 | 11.3663 | 15.7114 |
| 30      | 30      | 30      | 30      | 10.8908 | 11.0402 | 15.1256 |
| 30      | 30      | 30      | 30      | 11.2587 | 11.4666 | 30      |



|         |    |         |         |         |         |         |
|---------|----|---------|---------|---------|---------|---------|
| 30      | 30 | 30      | 19.6934 | 10.7389 | 10.8814 | 14.9791 |
| 30      | 30 | 30      | 19.1804 | 11.6188 | 11.718  | 22.8227 |
| 30      | 30 | 30      | 17.2606 | 9.82061 | 9.9736  | 16.3136 |
| 30      | 30 | 30      | 30      | 11.0664 | 11.2504 | 30      |
| 30      | 30 | 30      | 17.5214 | 10.9278 | 11.0095 | 14.1366 |
| 30      | 30 | 30      | 19.0051 | 10.9833 | 11.097  | 15.8097 |
| 30      | 30 | 30      | 30      | 12.1351 | 12.2378 | 17.4624 |
| 30      | 30 | 15.1535 | 14.4539 | 10.1565 | 10.3074 | 16.9893 |
| 30      | 30 | 30      | 30      | 12.1417 | 12.2533 | 30      |
| 26.7587 | 30 | 30      | 17.2232 | 13.5186 | 13.6274 | 30      |
| 30      | 30 | 30      | 17.0175 | 10.9173 | 11.0237 | 18.8799 |
| 30      | 30 | 30      | 16.6562 | 11.0424 | 11.1441 | 16.0369 |

| Gusb_A06 | Gusb_A18 | H6pd_A30 | H6pd_A42 | Hes1_A54 | Hes1_A66 | Hes5_A78 |
|----------|----------|----------|----------|----------|----------|----------|
| 30       | 30       | 19.8453  | 19.3508  | 16.3026  | 18.6206  | 30       |
| 17.4645  | 20.1455  | 30       | 30       | 30       | 23.3985  | 23.3898  |
| 30       | 17.6799  | 20.1344  | 19.3541  | 30       | 19.604   | 26.61    |
| 30       | 17.2366  | 21.6495  | 17.6274  | 30       | 30       | 30       |
| 19.039   | 17.5607  | 30       | 22.607   | 30       | 30       | 30       |
| 30       | 30       | 19.5679  | 22.7811  | 18.7571  | 18.2938  | 30       |
| 30       | 17.2158  | 19.5206  | 16.15    | 17.784   | 18.29    | 30       |
| 13.9558  | 13.1356  | 18.1569  | 16.5068  | 14.4706  | 12.3847  | 21.8944  |
| 30       | 18.1994  | 30       | 30       | 17.9828  | 17.0474  | 20.7146  |
| 30       | 30       | 30       | 21.2804  | 30       | 18.4957  | 21.9702  |
| 18.2205  | 16.3988  | 30       | 21.3977  | 17.7954  | 18.898   | 30       |
| 30       | 30       | 30       | 21.3047  | 30       | 30       | 30       |
| 30       | 17.6107  | 30       | 20.4054  | 20.7501  | 21.6794  | 21.2569  |
| 30       | 16.9414  | 18.5077  | 18.6699  | 18.7579  | 15.8626  | 22.7157  |
| 30       | 30       | 20.9146  | 18.4547  | 17.5014  | 17.8021  | 20.7095  |
| 19.171   | 16.4269  | 30       | 19.287   | 18.5     | 18.5937  | 23.0689  |
| 30       | 30       | 30       | 19.1918  | 18.4097  | 20.1931  | 25.8346  |
| 18.9275  | 18.5939  | 19.3997  | 18.3616  | 19.0622  | 30       | 25.9222  |
| 30       | 16.3183  | 30       | 21.78    | 30       | 30       | 20.6938  |
| 30       | 17.1101  | 19.1796  | 30       | 30       | 30       | 30       |
| 30       | 30       | 30       | 30       | 30       | 18.0959  | 20.4372  |
| 30       | 30       | 18.2852  | 17.6073  | 18.8643  | 18.6525  | 30       |
| 15.8794  | 15.38    | 20.3571  | 20.2159  | 14.9545  | 13.3362  | 30       |
| 30       | 22.1302  | 17.3359  | 17.4771  | 18.1024  | 17.2377  | 30       |
| 30       | 30       | 23.9593  | 19.5481  | 30       | 30       | 30       |
| 30       | 30       | 30       | 20.5505  | 19.3344  | 30       | 30       |
| 30       | 18.6392  | 30       | 30       | 21.2011  | 17.5896  | 20.1061  |
| 19.5345  | 30       | 30       | 27.2533  | 23.8671  | 30       | 30       |
| 19.5734  | 30       | 30       | 19.3362  | 21.4242  | 19.2754  | 30       |
| 30       | 30       | 30       | 30       | 24.1134  | 30       | 21.7278  |
| 17.2864  | 18.291   | 18.3191  | 21.9123  | 30       | 30       | 21.5963  |
| 30       | 17.2587  | 18.4247  | 18.1711  | 18.8554  | 16.3209  | 27.6938  |
| 30       | 18.2828  | 18.404   | 30       | 30       | 19.9748  | 20.1731  |
| 30       | 30       | 18.2782  | 16.1682  | 19.8445  | 16.5718  | 30       |
| 19.1772  | 17.6789  | 17.8511  | 18.7055  | 19.9849  | 17.4535  | 30       |
| 30       | 30       | 30       | 17.8028  | 30       | 30       | 30       |
| 30       | 24.0556  | 30       | 22.2581  | 19.9635  | 18.8909  | 21.3449  |
| 30       | 18.5041  | 19.5848  | 19.1317  | 30       | 22.6071  | 24.9571  |
| 30       | 30       | 30       | 26.46    | 19.7466  | 19.0901  | 30       |
| 30       | 30       | 20.0213  | 22.4598  | 30       | 19.7755  | 30       |

|         |         |         |         |         |         |         |
|---------|---------|---------|---------|---------|---------|---------|
| 15.9801 | 15.2135 | 19.7081 | 17.7837 | 17.0461 | 14.8304 | 30      |
| 30      | 30      | 18.5898 | 17.2791 | 18.5827 | 16.1533 | 30      |
| 26.533  | 20.6657 | 18.9192 | 17.4916 | 17.6053 | 20.7214 | 30      |
| 19.3652 | 30      | 30      | 26.4021 | 30      | 19.2715 | 30      |
| 18.2734 | 19.0903 | 30      | 30      | 30      | 19.8412 | 21.6826 |
| 30      | 18.0737 | 30      | 18.5832 | 20.2285 | 16.6078 | 30      |
| 19.2127 | 16.8818 | 18.2929 | 17.6772 | 30      | 22.9604 | 23.8893 |
| 30      | 30      | 18.9105 | 30      | 23.7047 | 18.5291 | 30      |
| 17.6715 | 16.1826 | 18.0006 | 18.1063 | 17.8611 | 15.9932 | 22.4789 |
| 30      | 30      | 18.4923 | 30      | 20.6457 | 18.5155 | 21.7618 |
| 17.9302 | 25.3081 | 30      | 30      | 30      | 30      | 30      |
| 30      | 17.009  | 17.3688 | 18.277  | 30      | 19.7631 | 30      |
| 30      | 18.9579 | 30      | 19.4609 | 30      | 30      | 21.5968 |
| 30      | 17.3136 | 30      | 30      | 20.3792 | 17.7357 | 20.663  |
| 30      | 25.2573 | 30      | 27.1139 | 17.5705 | 19.0065 | 20.839  |
| 17.7605 | 17.4829 | 30      | 30      | 18.4609 | 30      | 22.8163 |
| 30      | 20.1207 | 30      | 19.6214 | 30      | 30      | 21.5151 |
| 30      | 19.2587 | 18.464  | 18.5045 | 19.3903 | 24.2594 | 30      |
| 30      | 30      | 30      | 26.2927 | 30      | 30      | 30      |
| 30      | 30      | 30      | 19.5538 | 30      | 30      | 30      |
| 17.3321 | 18.8698 | 26.4059 | 30      | 25.127  | 30      | 25.8548 |
| 20.5111 | 20.52   | 23.4289 | 23.8788 | 30      | 30      | 26.8845 |
| 17.7828 | 21.4481 | 30      | 30      | 17.7191 | 21.2741 | 18.9407 |
| 17.058  | 19.2335 | 17.1183 | 23.624  | 17.5089 | 18.1999 | 17.4748 |
| 15.6024 | 30      | 21.8346 | 19.1729 | 27.6331 | 30      | 30      |
| 17.1667 | 30      | 18.9823 | 30      | 18.3276 | 30      | 17.9067 |
| 16.0569 | 30      | 18.6791 | 30      | 17.8453 | 18.2247 | 17.1918 |
| 15.7805 | 19.3629 | 16.9354 | 20.0893 | 17.8195 | 17.9677 | 30      |
| 12.4885 | 15.8895 | 14.1985 | 19.2743 | 16.8068 | 13.4307 | 12.1142 |
| 16.1054 | 30      | 17.5185 | 30      | 19.1418 | 30      | 21.462  |
| 16.6119 | 30      | 30      | 30      | 17.7684 | 18.6302 | 16.6565 |
| 14.4148 | 17.1676 | 16.251  | 30      | 19.3493 | 16.551  | 15.5584 |
| 17.5184 | 19.3316 | 17.736  | 30      | 18.0163 | 19.1274 | 30      |
| 18.725  | 18.1239 | 19.911  | 18.6498 | 17.1273 | 17.9679 | 17.3245 |
| 14.5713 | 19.0594 | 18.6856 | 18.6436 | 16.2658 | 16.1033 | 14.8115 |
| 18.3661 | 18.0621 | 18.9012 | 20.7268 | 18.6154 | 26.4203 | 30      |
| 13.4219 | 16.8092 | 15.8323 | 18.1984 | 17.022  | 15.8972 | 14.3843 |
| 15.7225 | 30      | 16.2796 | 23.2686 | 19.6536 | 30      | 21.3412 |
| 16.2215 | 18.9807 | 16.4782 | 19.6042 | 17.9873 | 16.8639 | 15.4657 |
| 14.7785 | 30      | 17.6053 | 30      | 17.0819 | 18.373  | 23.4444 |
| 16.3833 | 25.1708 | 17.18   | 19.8171 | 19.1097 | 30      | 30      |

|         |         |         |         |         |         |         |
|---------|---------|---------|---------|---------|---------|---------|
| 14.0183 | 16.2444 | 16.0312 | 22.8433 | 20.0281 | 15.406  | 14.1801 |
| 17.8071 | 30      | 18.2209 | 19.8306 | 16.0482 | 30      | 30      |
| 16.7194 | 19.1991 | 16.9658 | 20.0291 | 16.7207 | 19.6913 | 20.4875 |
| 18.6307 | 26.6056 | 19.458  | 20.3154 | 18.1413 | 17.0348 | 17.0126 |
| 14.7992 | 30      | 18.4751 | 30      | 20.0107 | 13.6457 | 12.2032 |
| 16.6218 | 30      | 17.4897 | 30      | 18.3936 | 30      | 30      |
| 17.3109 | 26.3034 | 30      | 30      | 17.5753 | 18.9927 | 18.3034 |
| 16.6763 | 30      | 18.4451 | 21.5076 | 18.0229 | 30      | 30      |
| 30      | 18.1778 | 30      | 30      | 20.3999 | 16.9959 | 15.2009 |
| 30      | 30      | 30      | 30      | 22.1398 | 30      | 30      |
| 17.6687 | 30      | 17.7135 | 30      | 20.8529 | 30      | 20.1537 |
| 16.3421 | 19.0318 | 16.9595 | 30      | 18.2012 | 30      | 21.645  |

| Hes5_A90 | Hif1a_A07 | Hif1a_A19 | Hopx_A31 | Hopx_A43 | Jag1_A55 | Jag1_A67 |
|----------|-----------|-----------|----------|----------|----------|----------|
| 30       | 30        | 30        | 16.0433  | 15.8399  | 21.9632  | 30       |
| 20.7037  | 30        | 30        | 18.0434  | 17.7079  | 24.0718  | 30       |
| 25.4087  | 18.3036   | 17.4061   | 26.4962  | 26.0832  | 27.3188  | 30       |
| 30       | 18.2765   | 16.5669   | 17.7136  | 17.6771  | 19.8966  | 18.1507  |
| 19.8635  | 30        | 30        | 16.5129  | 16.4516  | 22.4731  | 30       |
| 30       | 16.6509   | 17.3628   | 30       | 30       | 22.5793  | 18.102   |
| 30       | 16.1338   | 16.1139   | 17.1461  | 17.2622  | 21.6304  | 17.6748  |
| 27.8542  | 13.4952   | 12.964    | 11.1048  | 11.0877  | 16.6498  | 15.0641  |
| 22.0427  | 30        | 30        | 18.2729  | 17.9361  | 19.3837  | 30       |
| 30       | 30        | 17.4789   | 16.8385  | 16.5899  | 23.3087  | 30       |
| 30       | 17.1496   | 15.232    | 13.6453  | 13.5936  | 17.9668  | 17.581   |
| 30       | 18.691    | 30        | 30       | 30       | 21.6451  | 30       |
| 21.5035  | 17.789    | 30        | 30       | 30       | 24.1584  | 30       |
| 21.579   | 15.4454   | 14.1553   | 19.0233  | 18.8848  | 19.7767  | 18.7754  |
| 21.6211  | 17.0668   | 16.7472   | 30       | 30       | 20.3812  | 30       |
| 21.8031  | 16.3283   | 18.2416   | 14.0063  | 13.8162  | 20.3416  | 30       |
| 26.4303  | 30        | 30        | 17.6598  | 17.71    | 23.6468  | 30       |
| 23.1613  | 15.1556   | 15.3248   | 16.4376  | 16.3929  | 17.6042  | 17.9995  |
| 21.4002  | 17.138    | 30        | 21.7682  | 21.7684  | 22.1186  | 30       |
| 20.8058  | 30        | 17.4217   | 18.7335  | 18.8075  | 23.0374  | 30       |
| 22.0316  | 18.1332   | 15.3954   | 25.4652  | 30       | 21.2884  | 30       |
| 30       | 17.0008   | 30        | 16.1952  | 16.3127  | 24.4183  | 30       |
| 30       | 17.1702   | 16.1119   | 12.6427  | 12.5894  | 21.1123  | 17.2099  |
| 30       | 15.2159   | 14.0785   | 16.1817  | 16.2434  | 22.3203  | 18.2828  |
| 30       | 14.2677   | 13.6098   | 14.4762  | 14.6745  | 17.1114  | 15.0235  |
| 26.2655  | 30        | 30        | 18.9505  | 19.3429  | 20.9678  | 30       |
| 20.9905  | 17.3883   | 30        | 26.9086  | 30       | 24.1957  | 30       |
| 24.0648  | 30        | 30        | 17.1512  | 17.3095  | 22.1264  | 30       |
| 30       | 17.6411   | 30        | 18.7961  | 18.8775  | 20.5735  | 18.2549  |
| 24.8402  | 30        | 30        | 18.6295  | 18.6602  | 23.9777  | 30       |
| 26.84    | 21.2436   | 25.0511   | 17.7264  | 17.6784  | 21.783   | 30       |
| 22.2572  | 16.3709   | 16.0189   | 15.3192  | 15.3001  | 22.4961  | 30       |
| 23.5675  | 30        | 18.0652   | 18.4466  | 18.4496  | 20.2316  | 30       |
| 30       | 14.5907   | 13.7927   | 14.4898  | 14.5895  | 20.4847  | 30       |
| 30       | 17.9987   | 17.8014   | 15.4912  | 15.4888  | 19.4997  | 19.0944  |
| 30       | 18.3619   | 17.7757   | 18.2195  | 18.0586  | 19.9093  | 30       |
| 24.8009  | 17.5753   | 30        | 18.2696  | 18.2401  | 18.4615  | 22.1907  |
| 30       | 30        | 30        | 30       | 30       | 20.4059  | 30       |
| 30       | 20.298    | 17.6462   | 30       | 30       | 18.8383  | 30       |
| 30       | 30        | 30        | 18.1757  | 18.1047  | 19.7629  | 30       |

|         |         |         |         |         |         |         |
|---------|---------|---------|---------|---------|---------|---------|
| 30      | 14.5876 | 14.8841 | 12.8013 | 12.7476 | 16.8545 | 15.965  |
| 30      | 16.1999 | 15.6454 | 15.0085 | 14.9443 | 17.4192 | 16.5807 |
| 30      | 18.3958 | 30      | 16.2362 | 16.1888 | 22.1959 | 30      |
| 24.9039 | 16.52   | 16.9357 | 30      | 30      | 22.349  | 24.8166 |
| 23.4349 | 17.6294 | 30      | 17.1651 | 17.1384 | 22.6994 | 30      |
| 30      | 16.0752 | 17.5553 | 17.4406 | 17.5647 | 18.3738 | 30      |
| 23.1701 | 15.1493 | 13.9069 | 15.7292 | 15.7422 | 18.391  | 17.135  |
| 21.8168 | 17.2547 | 15.4345 | 16.1815 | 16.3023 | 24.7049 | 30      |
| 24.6583 | 14.4032 | 15.6577 | 13.6768 | 13.8542 | 24.4264 | 30      |
| 21.561  | 17.991  | 30      | 18.9173 | 18.8663 | 17.8729 | 30      |
| 24.6791 | 30      | 30      | 16.6957 | 16.835  | 20.3209 | 24.5368 |
| 22.0048 | 17.5405 | 17.7288 | 16.941  | 17.251  | 24.0141 | 18.5254 |
| 22.0107 | 30      | 16.5404 | 17.3239 | 17.3233 | 22.9263 | 18.6223 |
| 23.5291 | 15.8173 | 17.4249 | 16.774  | 16.9842 | 18.5126 | 30      |
| 23.7731 | 30      | 20.4809 | 17.1821 | 17.2818 | 22.2644 | 30      |
| 30      | 18.3354 | 17.7013 | 13.036  | 13.1586 | 17.9434 | 30      |
| 21.7087 | 18.5997 | 19.7341 | 21.9407 | 22.2203 | 21.6866 | 17.4606 |
| 22.4822 | 16.6327 | 30      | 18.9408 | 18.8579 | 21.6385 | 30      |
| 30      | 30      | 30      | 18.0533 | 18.1435 | 30      | 30      |
| 21.9538 | 16.1906 | 18.5155 | 26.1523 | 27.3906 | 23.8886 | 30      |
| 30      | 26.5485 | 30      | 17.9753 | 18.1654 | 25.2381 | 30      |
| 27.8808 | 30      | 30      | 20.1317 | 20.311  | 23.7356 | 30      |
| 20.9791 | 22.5308 | 17.506  | 15.207  | 19.5361 | 19.2485 | 23.772  |
| 30      | 30      | 17.8659 | 17.2315 | 13.7124 | 13.6326 | 25.2353 |
| 30      | 30      | 15.687  | 16.2588 | 16.9711 | 16.9483 | 22.0996 |
| 20.013  | 21.9632 | 30      | 30      | 19.4845 | 19.3424 | 22.4794 |
| 21.7998 | 20.4111 | 19.2225 | 16.647  | 17.2995 | 17.2151 | 23.8055 |
| 30      | 30      | 30      | 30      | 16.2327 | 16.2828 | 21.7803 |
| 21.8853 | 23.1784 | 14.4276 | 13.5356 | 12.2408 | 12.1461 | 17.7856 |
| 20.833  | 30      | 17.671  | 30      | 17.1769 | 17.118  | 22.6577 |
| 21.048  | 30      | 30      | 17.935  | 17.3888 | 17.3421 | 18.8583 |
| 30      | 30      | 15.0433 | 15.4133 | 13.2548 | 13.1714 | 17.1859 |
| 20.7378 | 21.23   | 16.2059 | 16.2983 | 30      | 30      | 21.2691 |
| 30      | 30      | 18.2961 | 30      | 14.3639 | 14.3173 | 22.7943 |
| 30      | 30      | 17.2786 | 16.1964 | 17.7701 | 17.6542 | 16.869  |
| 24.8183 | 30      | 16.7977 | 17.8434 | 15.4496 | 15.341  | 22.4766 |
| 23.103  | 21.9233 | 16.3222 | 15.632  | 12.94   | 12.8534 | 19.0509 |
| 22.0393 | 22.1362 | 18.2355 | 17.763  | 30      | 30      | 20.4052 |
| 30      | 30      | 16.6031 | 15.366  | 13.9524 | 13.8948 | 19.7482 |
| 30      | 30      | 17.607  | 17.4468 | 19.469  | 19.5631 | 19.8337 |
| 21.6573 | 21.5545 | 15.9959 | 16.4332 | 30      | 30      | 24.5838 |

|         |         |         |         |         |         |         |
|---------|---------|---------|---------|---------|---------|---------|
| 30      | 30      | 15.7039 | 14.931  | 13.7176 | 13.7223 | 23.8501 |
| 23.1146 | 23.688  | 30      | 17.4144 | 12.473  | 12.5118 | 25.2778 |
| 21.7077 | 22.2901 | 17.7987 | 16.6294 | 19.0294 | 19.3931 | 16.5957 |
| 27.7411 | 30      | 17.318  | 30      | 19.0928 | 19.0379 | 22.9098 |
| 30      | 30      | 14.9662 | 13.9975 | 14.282  | 14.2478 | 17.1225 |
| 28.2973 | 30      | 18.0478 | 15.9884 | 16.0476 | 16.0049 | 19.5139 |
| 30      | 30      | 15.9368 | 30      | 30      | 27.2811 | 26.2035 |
| 30      | 21.254  | 15.0255 | 13.7122 | 13.9137 | 13.8687 | 21.97   |
| 30      | 30      | 13.4829 | 15.7417 | 13.7777 | 13.7278 | 17.202  |
| 22.5986 | 20.8614 | 30      | 30      | 30      | 30      | 24.9037 |
| 21.5949 | 30      | 30      | 16.8931 | 18.9786 | 19.0735 | 21.2528 |
| 23.8826 | 22.0272 | 17.1794 | 17.56   | 30      | 30      | 24.5591 |

| Lgr5_A79 | Lgr5_A91 | Lrig1_A08 | Lrig1_A20 | Lyz2_A32 | Lyz2_A44 | Msi1_A56 |
|----------|----------|-----------|-----------|----------|----------|----------|
| 30       | 30       | 30        | 30        | 22.4392  | 20.8554  | 30       |
| 27.4457  | 30       | 18.4085   | 30        | 23.9115  | 19.2985  | 30       |
| 30       | 30       | 30        | 30        | 21.0828  | 21.6813  | 30       |
| 30       | 30       | 18.9155   | 22.197    | 22.6736  | 17.7907  | 30       |
| 30       | 30       | 30        | 25.6387   | 22.2548  | 18.9904  | 30       |
| 27.3978  | 30       | 30        | 21.7516   | 19.8535  | 21.0245  | 30       |
| 30       | 30       | 19.2631   | 23.0258   | 22.5093  | 17.7099  | 30       |
| 14.6822  | 15.5653  | 13.3716   | 12.6736   | 20.9725  | 16.1348  | 12.7425  |
| 30       | 17.9348  | 30        | 30        | 21.9037  | 17.4584  | 30       |
| 30       | 30       | 30        | 19.8691   | 22.4201  | 30       | 30       |
| 13.4205  | 14.3658  | 15.1911   | 14.5541   | 13.6101  | 12.0969  | 14.6684  |
| 30       | 30       | 30        | 30        | 23.1022  | 17.4281  | 30       |
| 30       | 30       | 30        | 30        | 22.3215  | 24.5315  | 19.6489  |
| 30       | 30       | 17.5263   | 18.4855   | 22.4154  | 30       | 30       |
| 30       | 30       | 30        | 30        | 23.2413  | 18.9966  | 30       |
| 30       | 19.1648  | 15.7202   | 16.7297   | 12.1853  | 11.2639  | 16.5839  |
| 30       | 30       | 30        | 30        | 22.7103  | 17.2342  | 30       |
| 30       | 30       | 30        | 30        | 21.3956  | 18.3508  | 30       |
| 30       | 30       | 19.6545   | 30        | 22.8024  | 17.6775  | 30       |
| 30       | 30       | 30        | 30        | 19.8926  | 17.9424  | 30       |
| 30       | 30       | 30        | 30        | 23.3844  | 18.2276  | 30       |
| 17.2952  | 20.2429  | 30        | 26.8048   | 21.3248  | 21.0952  | 30       |
| 14.4336  | 16.2464  | 13.5456   | 14.4778   | 21.2635  | 17.3073  | 14.033   |
| 30       | 30       | 18.9331   | 17.4465   | 23.4233  | 19.0183  | 30       |
| 30       | 30       | 30        | 30        | 22.1092  | 30       | 30       |
| 30       | 30       | 30        | 30        | 24.0431  | 18.161   | 30       |
| 30       | 30       | 30        | 18.4338   | 21.7154  | 26.6746  | 30       |
| 30       | 30       | 30        | 22.2137   | 30       | 18.6608  | 30       |
| 30       | 30       | 30        | 30        | 24.9124  | 18.9132  | 30       |
| 30       | 30       | 30        | 30        | 27.2905  | 19.2117  | 30       |
| 30       | 27.8182  | 30        | 22.3683   | 25.8673  | 30       | 30       |
| 30       | 30       | 30        | 18.6567   | 23.0342  | 17.6716  | 30       |
| 30       | 30       | 30        | 30        | 20.9525  | 18.9404  | 30       |
| 30       | 30       | 30        | 30        | 21.8402  | 25.0624  | 30       |
| 30       | 30       | 17.6812   | 30        | 22.1815  | 22.7546  | 30       |
| 30       | 30       | 30        | 18.6321   | 20.7165  | 21.4014  | 30       |
| 30       | 30       | 22.2834   | 30        | 21.0838  | 18.465   | 30       |
| 30       | 30       | 17.3622   | 24.7656   | 21.7696  | 17.8221  | 30       |
| 26.5516  | 30       | 30        | 30        | 19.6179  | 18.32    | 30       |
| 30       | 30       | 19.3618   | 30        | 22.4169  | 17.9382  | 30       |



|         |         |         |         |         |         |         |
|---------|---------|---------|---------|---------|---------|---------|
| 17.2927 | 18.8103 | 16.3163 | 15.0399 | 23.2597 | 17.9315 | 14.8005 |
| 30      | 30      | 17.3099 | 18.0926 | 20.5252 | 17.4281 | 30      |
| 30      | 30      | 30      | 30      | 21.381  | 21.0473 | 30      |
| 30      | 30      | 18.4678 | 30      | 20.4221 | 20.9116 | 30      |
| 30      | 30      | 30      | 22.1579 | 22.9354 | 18.3271 | 30      |
| 27.5222 | 30      | 30      | 17.3273 | 21.7198 | 25.4844 | 30      |
| 16.2896 | 30      | 17.6717 | 18.2372 | 20.6743 | 18.0751 | 30      |
| 30      | 30      | 30      | 30      | 21.3338 | 19.0041 | 30      |
| 30      | 30      | 18.4404 | 16.9058 | 19.3916 | 17.1023 | 30      |
| 30      | 30      | 30      | 30      | 20.6911 | 18.7103 | 30      |
| 30      | 30      | 30      | 30      | 21.5662 | 18.2043 | 30      |
| 30      | 30      | 30      | 18.1858 | 19.9247 | 17.6824 | 30      |
| 30      | 30      | 30      | 24.3163 | 21.9072 | 19.1263 | 30      |
| 30      | 30      | 30      | 26.9793 | 19.9528 | 18.2941 | 30      |
| 30      | 30      | 18.346  | 30      | 20.9905 | 18.1913 | 30      |
| 14.2483 | 14.2419 | 14.745  | 14.6638 | 12.6692 | 11.8925 | 14.4644 |
| 30      | 30      | 30      | 30      | 20.5613 | 17.8952 | 30      |
| 30      | 30      | 30      | 30      | 22.794  | 18.7389 | 30      |
| 30      | 30      | 30      | 30      | 23.1602 | 30      | 30      |
| 30      | 30      | 30      | 30      | 24.1087 | 22.4166 | 30      |
| 20.6057 | 18.4427 | 30      | 22.8099 | 30      | 19.27   | 17.6319 |
| 30      | 30      | 30      | 30      | 25.9054 | 25.8201 | 30      |
| 30      | 30      | 30      | 30      | 30      | 21.8913 | 18.8503 |
| 18.5508 | 30      | 30      | 15.156  | 15.9072 | 13.6684 | 13.3315 |
| 30      | 30      | 30      | 30      | 30      | 21.5525 | 19.784  |
| 30      | 30      | 30      | 26.4612 | 30      | 22.5069 | 16.9151 |
| 30      | 30      | 30      | 30      | 23.9613 | 20.3805 | 16.7654 |
| 30      | 30      | 30      | 30      | 22.1347 | 20.1342 | 18.0406 |
| 15.9217 | 15.9188 | 16.6294 | 12.908  | 11.9401 | 20.7798 | 16.9747 |
| 30      | 30      | 30      | 28.3374 | 30      | 20.6069 | 16.3993 |
| 30      | 30      | 30      | 30      | 30      | 22.0401 | 25.2787 |
| 16.9383 | 14.0171 | 14.6052 | 12.925  | 13.0029 | 21.0285 | 16.5739 |
| 30      | 30      | 30      | 30      | 30      | 20.277  | 17.126  |
| 30      | 30      | 18.843  | 16.5885 | 17.4451 | 10.0051 | 10.2142 |
| 15.2962 | 30      | 30      | 15.3259 | 16.1094 | 20.0263 | 22.6281 |
| 30      | 30      | 30      | 30      | 28.4867 | 20.3566 | 18.3215 |
| 30      | 15.0493 | 16.4732 | 12.3829 | 12.5116 | 19.4037 | 17.9674 |
| 30      | 30      | 30      | 30      | 30      | 22.1364 | 18.0984 |
| 30      | 14.6465 | 15.3353 | 15.187  | 14.6035 | 20.3639 | 21.4799 |
| 16.3911 | 30      | 30      | 30      | 30      | 20.6173 | 19.442  |
| 30      | 30      | 30      | 30      | 30      | 20.3533 | 16.4844 |

|         |         |         |         |         |         |         |
|---------|---------|---------|---------|---------|---------|---------|
| 18.7974 | 16.2141 | 17.3373 | 14.6824 | 13.843  | 21.7541 | 17.8215 |
| 30      | 30      | 30      | 30      | 30      | 20.6784 | 19.0216 |
| 18.7233 | 30      | 30      | 30      | 30      | 21.0229 | 17.5687 |
| 30      | 30      | 30      | 30      | 30      | 19.5918 | 18.3891 |
| 30      | 17.2689 | 16.462  | 15.0707 | 15.3259 | 17.9996 | 18.2833 |
| 27.2091 | 30      | 30      | 30      | 30      | 20.6733 | 21.8244 |
| 30      | 30      | 30      | 30      | 30      | 20.3992 | 17.5482 |
| 30      | 30      | 18.8013 | 30      | 17.1879 | 19.9877 | 17.6615 |
| 18.0908 | 30      | 30      | 18.4404 | 18.5678 | 20.8606 | 22.0052 |
| 28.1844 | 30      | 30      | 30      | 30      | 20.3432 | 17.33   |
| 30      | 30      | 30      | 18.5056 | 30      | 21.2394 | 17.8681 |
| 30      | 30      | 30      | 28.0053 | 30      | 22.4359 | 16.9625 |

| Msi1_A68 | Msi2_A80 | Msi2_A92 | Myb_A09 | Myb_A21 | Myc_A33 | Myc_A45 |
|----------|----------|----------|---------|---------|---------|---------|
| 30       | 30       | 30       | 30      | 30      | 17.2695 | 18.9062 |
| 30       | 30       | 18.0186  | 30      | 30      | 20.2546 | 17.8638 |
| 30       | 30       | 17.6542  | 30      | 30      | 30      | 30      |
| 30       | 17.4925  | 19.3969  | 17.1364 | 16.5284 | 30      | 30      |
| 30       | 30       | 23.2058  | 30      | 30      | 17.0546 | 19.0548 |
| 30       | 30       | 26.9105  | 30      | 19.0211 | 30      | 30      |
| 30       | 16.2217  | 21.8446  | 30      | 30      | 30      | 30      |
| 15.0446  | 12.977   | 15.5561  | 10.2534 | 10.5366 | 10.253  | 10.6443 |
| 30       | 18.2443  | 27.0993  | 30      | 30      | 30      | 30      |
| 30       | 30       | 17.6312  | 16.7396 | 16.9943 | 30      | 18.8351 |
| 15.2704  | 15.1848  | 16.7932  | 14.6243 | 14.4629 | 17.5413 | 18.3266 |
| 30       | 30       | 30       | 30      | 30      | 30      | 30      |
| 18.4319  | 30       | 17.6744  | 30      | 30      | 30      | 30      |
| 30       | 18.4333  | 23.1359  | 30      | 23.5398 | 30      | 30      |
| 30       | 30       | 25.757   | 30      | 30      | 30      | 30      |
| 17.3096  | 16.294   | 20.932   | 30      | 25.3776 | 18.1906 | 18.1652 |
| 30       | 30       | 30       | 30      | 30      | 30      | 30      |
| 30       | 18.1247  | 18.5873  | 30      | 30      | 30      | 18.6254 |
| 30       | 30       | 26.7912  | 30      | 30      | 30      | 30      |
| 30       | 30       | 30       | 30      | 30      | 30      | 30      |
| 30       | 30       | 25.0306  | 30      | 30      | 17.6719 | 30      |
| 30       | 19.0586  | 20.9485  | 17.1747 | 16.3598 | 16.3203 | 16.0662 |
| 16.8772  | 14.7994  | 16.0265  | 12.6379 | 12.9851 | 11.7468 | 12.535  |
| 30       | 16.4109  | 18.0001  | 30      | 23.0303 | 30      | 30      |
| 30       | 16.6088  | 16.8589  | 30      | 30      | 30      | 30      |
| 30       | 16.834   | 23.2505  | 30      | 30      | 30      | 30      |
| 30       | 30       | 26.8444  | 30      | 23.335  | 30      | 30      |
| 30       | 30       | 20.4286  | 30      | 30      | 30      | 30      |
| 30       | 30       | 23.2305  | 30      | 30      | 30      | 30      |
| 30       | 18.1032  | 20.0277  | 30      | 30      | 30      | 30      |
| 27.159   | 20.5424  | 21.5959  | 30      | 30      | 30      | 30      |
| 30       | 17.1069  | 22.1469  | 30      | 27.9093 | 30      | 30      |
| 30       | 30       | 20.9202  | 30      | 30      | 30      | 30      |
| 30       | 18.3015  | 22.0473  | 30      | 24.0434 | 30      | 30      |
| 30       | 18.5268  | 24.1632  | 30      | 28.3198 | 30      | 17.6772 |
| 30       | 30       | 17.4738  | 17.4072 | 30      | 30      | 30      |
| 30       | 30       | 30       | 17.1517 | 17.7704 | 30      | 30      |
| 30       | 18.8799  | 18.6348  | 16.7539 | 18.4016 | 30      | 30      |
| 30       | 17.2715  | 23.5444  | 30      | 30      | 30      | 30      |
| 20.3518  | 30       | 30       | 30      | 23.4996 | 30      | 30      |

|         |         |         |         |         |         |         |
|---------|---------|---------|---------|---------|---------|---------|
| 15.7476 | 16.3319 | 17.9517 | 13.0052 | 13.3298 | 12.0356 | 12.4535 |
| 30      | 18.2019 | 18.6778 | 30      | 30      | 26.348  | 25.3127 |
| 30      | 30      | 25.2676 | 30      | 30      | 30      | 30      |
| 30      | 18.1772 | 20.0458 | 25.1278 | 30      | 19.0072 | 30      |
| 30      | 30      | 18.8446 | 30      | 30      | 30      | 30      |
| 30      | 30      | 30      | 30      | 30      | 30      | 30      |
| 30      | 17.8467 | 19.9184 | 16.3704 | 17.0361 | 30      | 30      |
| 30      | 30      | 22.291  | 30      | 27.5724 | 30      | 30      |
| 30      | 16.4396 | 17.7089 | 13.4357 | 13.2826 | 14.2983 | 15.3254 |
| 30      | 26.5433 | 21.0884 | 18.0511 | 16.6887 | 30      | 30      |
| 30      | 30      | 27.0623 | 30      | 30      | 30      | 30      |
| 30      | 30      | 30      | 19.4883 | 23.4129 | 16.9586 | 30      |
| 30      | 30      | 23.5882 | 16.7356 | 30      | 30      | 30      |
| 30      | 30      | 19.9783 | 30      | 30      | 30      | 17.1093 |
| 30      | 30      | 26.0217 | 30      | 30      | 17.7487 | 30      |
| 16.0494 | 15.2053 | 16.7681 | 15.9625 | 16.3735 | 13.9673 | 14.7922 |
| 30      | 18.5404 | 24.2376 | 30      | 30      | 30      | 30      |
| 30      | 30      | 24.1835 | 30      | 30      | 19.4781 | 17.7693 |
| 30      | 30      | 30      | 30      | 27.4857 | 30      | 30      |
| 30      | 30      | 30      | 18.2629 | 30      | 30      | 30      |
| 18.954  | 18.9216 | 22.357  | 19.5412 | 17.6808 | 24.6141 | 19.9527 |
| 30      | 30      | 30      | 23.5187 | 22.3895 | 24.3227 | 30      |
| 30      | 30      | 30      | 25.1714 | 30      | 30      | 30      |
| 17.1329 | 18.239  | 15.7156 | 17.6375 | 17.0255 | 16.7378 | 17.4168 |
| 30      | 30      | 18.4951 | 17.8399 | 30      | 30      | 30      |
| 30      | 30      | 30      | 26.3054 | 30      | 30      | 30      |
| 30      | 30      | 18.5498 | 27.1266 | 30      | 30      | 30      |
| 30      | 30      | 18.6155 | 18.7904 | 30      | 18.5063 | 30      |
| 12.7938 | 14.363  | 12.8433 | 13.9325 | 11.0328 | 11.1685 | 11.9065 |
| 26.8121 | 26.859  | 30      | 24.656  | 30      | 19.4952 | 30      |
| 30      | 30      | 18.5455 | 17.2995 | 30      | 30      | 30      |
| 12.5655 | 15.3108 | 14.9522 | 16.3292 | 12.4359 | 12.3493 | 12.9973 |
| 30      | 30      | 30      | 17.8306 | 30      | 26.869  | 30      |
| 16.2071 | 17.0121 | 16.0244 | 16.6542 | 16.6018 | 16.9242 | 16.1023 |
| 30      | 30      | 17.5452 | 18.3731 | 18.1814 | 18.6248 | 15.3906 |
| 30      | 30      | 18.5279 | 18.8315 | 30      | 27.8633 | 18.323  |
| 13.2708 | 15.7059 | 13.7716 | 14.8938 | 12.1162 | 11.6941 | 12.4331 |
| 30      | 22.8734 | 17.5522 | 18.0119 | 30      | 30      | 30      |
| 14.0351 | 15.8807 | 16.2661 | 17.7011 | 14.1355 | 13.3829 | 13.4858 |
| 30      | 30      | 30      | 30      | 30      | 30      | 30      |
| 30      | 30      | 30      | 27.3997 | 30      | 24.621  | 26.4366 |

|         |         |         |         |         |         |         |
|---------|---------|---------|---------|---------|---------|---------|
| 14.4177 | 17.3182 | 15.1596 | 17.5209 | 13.0585 | 12.8106 | 13.4283 |
| 16.8004 | 17.79   | 15.9405 | 17.7275 | 30      | 18.1136 | 30      |
| 30      | 30      | 30      | 30      | 30      | 22.9238 | 30      |
| 30      | 30      | 28.3182 | 21.0063 | 30      | 27.6988 | 30      |
| 16.2803 | 30      | 14.9695 | 16.4385 | 13.6594 | 13.4657 | 13.9166 |
| 30      | 30      | 30      | 18.8295 | 30      | 30      | 30      |
| 30      | 30      | 30      | 30      | 30      | 24.198  | 30      |
| 15.2124 | 19.2211 | 14.8768 | 14.5694 | 15.3426 | 18.2234 | 20.2132 |
| 18.3748 | 19.4604 | 18.7027 | 19.5897 | 30      | 30      | 30      |
| 30      | 30      | 30      | 23.9799 | 30      | 30      | 30      |
| 30      | 30      | 30      | 17.7325 | 30      | 27.7436 | 30      |
| 30      | 30      | 30      | 30      | 30      | 30      | 30      |

| Notch1_A57 | Notch1_A69 | Numb_A81 | Numb_A93 | Olfm4_A10 | Olfm4_A22 | Pcna_A34 |
|------------|------------|----------|----------|-----------|-----------|----------|
| 21.5249    | 30         | 19.3088  | 15.565   | 30        | 30        | 17.8662  |
| 19.4786    | 30         | 18.3525  | 15.7116  | 17.4817   | 30        | 18.2046  |
| 18.9935    | 30         | 23.0796  | 16.6131  | 18.2425   | 30        | 16.6344  |
| 20.0171    | 19.5132    | 19.0709  | 15.9926  | 30        | 23.7819   | 16.5353  |
| 22.7714    | 30         | 19.2595  | 16.846   | 23.3246   | 24.6605   | 16.7742  |
| 18.5422    | 30         | 19.0116  | 30       | 16.9289   | 30        | 17.0283  |
| 21.9545    | 17.4498    | 16.0181  | 14.3833  | 16.6627   | 19.6379   | 14.2824  |
| 12.8112    | 13.0771    | 15.6265  | 13.5525  | 7.55306   | 15.5866   | 10.6384  |
| 18.1489    | 30         | 19.0249  | 15.385   | 17.8049   | 22.7211   | 16.2983  |
| 18.9691    | 30         | 20.4639  | 18.5661  | 18.646    | 18.9978   | 17.1364  |
| 14.6571    | 16.0059    | 18.6345  | 16.3291  | 8.67769   | 30        | 15.7762  |
| 21.2701    | 30         | 18.8487  | 16.7296  | 17.0482   | 23.2103   | 16.4333  |
| 19.1996    | 30         | 30       | 17.3075  | 17.4811   | 17.8088   | 17.1401  |
| 16.2308    | 30         | 15.3052  | 14.3675  | 18.4425   | 30        | 15.7162  |
| 17.4344    | 30         | 18.7621  | 15.6648  | 16.6774   | 30        | 16.4392  |
| 16.5005    | 30         | 23.0451  | 18.7434  | 18.0304   | 17.5676   | 16.6822  |
| 16.6199    | 30         | 30       | 15.4805  | 18.151    | 19.3915   | 15.9633  |
| 15.5958    | 30         | 15.9118  | 13.7401  | 17.4056   | 17.5678   | 16.1907  |
| 17.4598    | 30         | 19.2255  | 15.9916  | 30        | 30        | 18.046   |
| 22.8565    | 30         | 17.7361  | 16.5224  | 30        | 30        | 18.1824  |
| 16.1899    | 18.1362    | 18.8233  | 15.6533  | 30        | 30        | 13.1504  |
| 14.2023    | 18.1986    | 19.6554  | 16.223   | 18.4273   | 30        | 17.0029  |
| 14.3721    | 16.7639    | 17.0124  | 15.7265  | 8.87117   | 17.905    | 13.9966  |
| 24.3754    | 30         | 17.9002  | 14.1974  | 18.5448   | 30        | 16.0017  |
| 16.0191    | 30         | 15.5209  | 14.2268  | 16.6794   | 23.1699   | 16.1624  |
| 18.0362    | 30         | 20.1944  | 15.8279  | 30        | 22.1168   | 16.9952  |
| 18.2311    | 30         | 19.3087  | 16.6904  | 17.4824   | 30        | 16.3672  |
| 18.0783    | 30         | 17.187   | 15.9436  | 30        | 21.7303   | 20.4128  |
| 17.7563    | 30         | 17.2815  | 15.5658  | 18.3756   | 30        | 18.19    |
| 16.4585    | 30         | 18.5871  | 17.5925  | 30        | 23.1091   | 20.1423  |
| 16.6385    | 30         | 16.5906  | 14.2321  | 22.9043   | 30        | 19.6461  |
| 17.4557    | 30         | 16.8065  | 15.5696  | 16.4649   | 18.7991   | 17.7304  |
| 18.9182    | 30         | 18.6662  | 30       | 18.0201   | 30        | 18.4904  |
| 17.1247    | 30         | 15.441   | 14.3206  | 16.6854   | 16.6764   | 14.9939  |
| 20.2964    | 30         | 16.8905  | 15.9326  | 16.7105   | 23.0714   | 16.3066  |
| 15.7688    | 30         | 16.4811  | 16.9286  | 15.7731   | 18.6289   | 17.7259  |
| 17.0357    | 30         | 17.2643  | 15.0223  | 17.3552   | 18.7672   | 16.3632  |
| 18.3867    | 30         | 16.6804  | 16.6033  | 30        | 30        | 17.3049  |
| 17.5165    | 30         | 17.8596  | 16.4601  | 16.708    | 17.894    | 16.5399  |
| 16.5438    | 30         | 18.865   | 15.0068  | 17.3451   | 30        | 16.2977  |

|         |         |         |         |         |         |         |
|---------|---------|---------|---------|---------|---------|---------|
| 15.886  | 18.5803 | 17.2581 | 15.4182 | 9.55081 | 18.6883 | 14.2286 |
| 16.4584 | 30      | 15.5209 | 14.0969 | 23.0519 | 30      | 14.6955 |
| 16.7248 | 30      | 17.4225 | 15.2753 | 18.6452 | 30      | 16.2238 |
| 15.5375 | 30      | 18.7039 | 16.9829 | 15.872  | 18.6878 | 17.107  |
| 15.3635 | 30      | 18.4208 | 16.0184 | 17.195  | 30      | 23.4429 |
| 21.4705 | 30      | 30      | 16.8289 | 30      | 19.3858 | 17.1345 |
| 19.9708 | 30      | 14.7172 | 13.1152 | 30      | 18.4135 | 16.5321 |
| 17.9679 | 30      | 18.0741 | 16.4177 | 16.134  | 30      | 16.6336 |
| 16.0808 | 30      | 16.9761 | 15.5196 | 15.2171 | 22.9214 | 13.4921 |
| 17.1475 | 30      | 17.3966 | 15.7445 | 17.1295 | 30      | 15.5814 |
| 16.7188 | 30      | 22.6884 | 16.803  | 17.2655 | 30      | 16.9999 |
| 16.123  | 30      | 18.3206 | 16.5677 | 15.2703 | 18.2085 | 16.1721 |
| 17.3666 | 30      | 19.0457 | 16.5519 | 17.7523 | 30      | 18.0073 |
| 15.8591 | 30      | 14.8265 | 13.5824 | 15.3728 | 30      | 16.4844 |
| 16.6707 | 30      | 30      | 18.3173 | 18.4663 | 30      | 17.3887 |
| 16.3954 | 16.5018 | 17.946  | 15.648  | 9.76246 | 17.7171 | 16.5156 |
| 16.5502 | 30      | 18.859  | 16.1158 | 19.6219 | 30      | 18.6082 |
| 19.7206 | 30      | 20.9564 | 15.496  | 17.649  | 19.3499 | 18.9211 |
| 17.9498 | 30      | 30      | 17.3181 | 30      | 30      | 18.6036 |
| 16.9177 | 30      | 16.6155 | 15.1774 | 17.5627 | 30      | 30      |
| 20.4236 | 30      | 20.7604 | 20.0646 | 18.4955 | 30      | 19.7529 |
| 21.406  | 30      | 20.879  | 17.8416 | 25.2473 | 30      | 23.9462 |
| 30      | 23.3292 | 30      | 18.7687 | 17.8604 | 18.9272 | 19.0828 |
| 16.7795 | 20.8889 | 30      | 16.2964 | 17.1821 | 18.897  | 16.0233 |
| 30      | 20.1211 | 30      | 17.6765 | 15.0972 | 30      | 16.0746 |
| 30      | 16.8589 | 30      | 16.0115 | 15.7299 | 30      | 13.1931 |
| 30      | 17.3078 | 16.9612 | 16.4486 | 15.0679 | 18.8147 | 16.4776 |
| 30      | 15.1953 | 17.0423 | 30      | 16.7671 | 16.1919 | 18.792  |
| 12.8144 | 13.9171 | 13.6187 | 15.3993 | 15.3323 | 8.50005 | 11.709  |
| 30      | 16.5693 | 30      | 20.2475 | 16.861  | 24.4015 | 18.0374 |
| 30      | 18.823  | 30      | 16.8195 | 15.4918 | 17.6256 | 16.0479 |
| 13.2778 | 14.8607 | 15.0741 | 17.1099 | 15.7422 | 8.7415  | 12.6667 |
| 30      | 16.1169 | 30      | 17.5762 | 15.8906 | 18.6245 | 15.3028 |
| 18.3517 | 20.2996 | 30      | 30      | 30      | 30      | 17.2708 |
| 16.7931 | 13.8489 | 16.5193 | 16.13   | 15.0466 | 30      | 15.054  |
| 30      | 14.7567 | 16.5658 | 18.8076 | 16.9544 | 30      | 16.7124 |
| 12.9979 | 14.0243 | 13.872  | 15.7939 | 15.3411 | 9.36639 | 12.0382 |
| 30      | 17.876  | 30      | 16.9166 | 17.4257 | 18.5354 | 16.1808 |
| 13.974  | 15.0563 | 15.9589 | 19.1242 | 19.2875 | 9.50976 | 15.0275 |
| 30      | 18.9362 | 30      | 15.5937 | 15.5555 | 18.3155 | 17.2341 |
| 30      | 16.9514 | 30      | 16.8048 | 15.5607 | 30      | 15.7012 |

|         |         |         |         |         |         |         |
|---------|---------|---------|---------|---------|---------|---------|
| 14.2768 | 16.5629 | 15.1592 | 16.9595 | 16.6321 | 9.76345 | 13.1037 |
| 30      | 19.895  | 30      | 17.3159 | 19.4574 | 30      | 17.6976 |
| 30      | 16.5253 | 30      | 17.4793 | 16.3878 | 18.6471 | 16.3917 |
| 30      | 17.3191 | 30      | 16.2294 | 15.5999 | 17.8053 | 20.9606 |
| 14.1673 | 14.748  | 15.2115 | 19.9812 | 17.2973 | 9.67541 | 15.3659 |
| 30      | 17.5175 | 30      | 15.3851 | 16.3662 | 21.5158 | 15.3008 |
| 30      | 20.5661 | 30      | 16.8249 | 18.634  | 30      | 16.0701 |
| 30      | 16.5439 | 30      | 17.1858 | 15.4689 | 18.517  | 15.6423 |
| 30      | 26.2078 | 30      | 30      | 17.1749 | 30      | 24.5154 |
| 30      | 18.7809 | 30      | 30      | 30      | 30      | 16.449  |
| 30      | 17.9662 | 30      | 17.8019 | 16.2288 | 30      | 16.0849 |
| 30      | 17.0361 | 30      | 16.3894 | 15.5614 | 19.2794 | 16.4095 |



| Pcna_A46 | Ppargc1b_A5 | Ppargc1b_A7 | Rhoa_A82 | Rhoa_A94 | Saa2_A11 | Saa2_A23 |
|----------|-------------|-------------|----------|----------|----------|----------|
| 15.1562  | 30          | 15.8179     | 13.847   | 15.8781  | 18.4321  | 16.9487  |
| 16.4588  | 30          | 16.7379     | 13.9771  | 14.574   | 20.5393  | 20.153   |
| 17.7139  | 18.5618     | 15.5262     | 13.1855  | 13.4324  | 30       | 17.046   |
| 15.0073  | 30          | 16.0157     | 13.5213  | 14.3584  | 30       | 19.6364  |
| 15.3172  | 30          | 16.9373     | 13.0384  | 15.0847  | 23.3939  | 19.9555  |
| 15.818   | 30          | 17.0523     | 14.5954  | 15.1644  | 25.3124  | 18.5028  |
| 14.2952  | 18.133      | 14.2058     | 12.6115  | 14.1392  | 21.0537  | 17.2082  |
| 9.20599  | 13.603      | 12.0441     | 9.87461  | 11.5703  | 30       | 18.5515  |
| 15.034   | 15.0657     | 13.7192     | 12.8151  | 14.4958  | 20.2782  | 19.0436  |
| 17.9135  | 30          | 17.8114     | 15.1427  | 15.8805  | 23.5433  | 18.6534  |
| 13.9804  | 18.1424     | 16.7699     | 12.5243  | 13.6246  | 19.8938  | 17.0113  |
| 16.2815  | 30          | 30          | 13.6127  | 14.8137  | 21.032   | 20.3538  |
| 16.9214  | 30          | 30          | 13.6978  | 15.4633  | 21.8166  | 17.6803  |
| 14.5263  | 16.1664     | 13.9094     | 11.8527  | 13.6624  | 24.4062  | 17.5832  |
| 15.5378  | 18.3862     | 17.9811     | 13.5663  | 13.9139  | 18.8874  | 16.0731  |
| 17.3375  | 30          | 30          | 14.3856  | 14.186   | 30       | 19.2333  |
| 16.3328  | 30          | 16.1224     | 14.4723  | 16.2004  | 19.6385  | 16.9938  |
| 16.6592  | 15.741      | 14.3178     | 12.0047  | 13.5625  | 30       | 30       |
| 17.2635  | 17.8181     | 14.7824     | 15.4958  | 15.1475  | 20.1161  | 16.9069  |
| 15.9684  | 16.7488     | 16.07       | 12.9388  | 13.8079  | 22.1514  | 21.5727  |
| 16.1183  | 30          | 16.8035     | 13.3246  | 16.3954  | 30       | 26.0202  |
| 16.3779  | 15.2126     | 14.6225     | 13.8134  | 13.8929  | 30       | 30       |
| 12.478   | 14.4552     | 13.9666     | 11.8257  | 13.4445  | 30       | 30       |
| 15.1521  | 17.7559     | 16.1556     | 12.0516  | 13.4416  | 30       | 30       |
| 14.4857  | 30          | 14.3722     | 11.5061  | 12.9801  | 24.93    | 21.496   |
| 16.7073  | 17.3167     | 15.7907     | 14.0592  | 14.5996  | 23.596   | 18.9912  |
| 15.2739  | 30          | 30          | 14.3737  | 14.3094  | 30       | 17.0802  |
| 21.0006  | 17.5501     | 18.1286     | 14.5709  | 14.9895  | 30       | 19.4598  |
| 17.5653  | 30          | 17.9932     | 14.0966  | 15.1568  | 30       | 19.5506  |
| 20.453   | 30          | 21.333      | 16.3459  | 17.5485  | 24.8672  | 17.3465  |
| 20.3773  | 30          | 30          | 13.1014  | 14.1102  | 30       | 18.7732  |
| 15.6552  | 16.3209     | 14.3552     | 12.5595  | 14.5949  | 25.5002  | 18.7145  |
| 15.323   | 30          | 15.7765     | 13.8873  | 14.2973  | 23.5211  | 17.4866  |
| 13.6778  | 15.4413     | 13.8249     | 12.1297  | 13.6435  | 19.7686  | 17.8653  |
| 15.3563  | 16.143      | 15.2256     | 13.1407  | 13.5524  | 30       | 17.7017  |
| 16.5864  | 16.9522     | 16.0361     | 13.8222  | 14.9043  | 24.402   | 18.305   |
| 14.7445  | 16.8898     | 30          | 13.6144  | 14.3685  | 18.7922  | 17.0257  |
| 16.4297  | 30          | 16.8637     | 13.3007  | 14.5436  | 21.3958  | 17.6272  |
| 16.1996  | 30          | 30          | 13.8245  | 14.9671  | 16.6684  | 17.0642  |
| 15.6407  | 17.1373     | 16.903      | 13.2147  | 14.2209  | 24.9827  | 19.1956  |

|         |         |         |         |         |         |         |
|---------|---------|---------|---------|---------|---------|---------|
| 13.0879 | 15.3732 | 13.2256 | 11.2919 | 12.7095 | 20.8838 | 16.8466 |
| 13.8993 | 19.1399 | 19.016  | 11.5216 | 13.3786 | 25.0294 | 24.1301 |
| 15.464  | 30      | 18.0439 | 13.5949 | 13.9523 | 19.0618 | 18.6406 |
| 16.7613 | 30      | 30      | 12.9104 | 14.0913 | 19.5123 | 17.0905 |
| 16.1045 | 16.8778 | 14.3009 | 13.3812 | 15.1444 | 21.3537 | 17.878  |
| 15.1411 | 30      | 18.1052 | 12.7759 | 14.73   | 20.3316 | 16.4578 |
| 14.4107 | 16.8065 | 14.1736 | 11.5708 | 13.7385 | 30      | 23.6918 |
| 16.1396 | 19.5566 | 15.8934 | 13.7935 | 15.9979 | 22.3889 | 18.75   |
| 12.6267 | 16.3711 | 15.1542 | 12.1011 | 13.285  | 20.756  | 17.6737 |
| 16.4998 | 30      | 16.6775 | 13.9949 | 14.3692 | 30      | 21.1587 |
| 16.3035 | 18.2468 | 16.2948 | 13.95   | 15.0994 | 22.6016 | 16.4632 |
| 15.221  | 19.3687 | 15.9436 | 13.6169 | 14.2455 | 21.3701 | 16.1503 |
| 16.3812 | 30      | 15.0518 | 14.0427 | 15.6448 | 20.5207 | 16.761  |
| 14.6295 | 30      | 27.194  | 12.0305 | 13.519  | 22.5022 | 17.224  |
| 16.917  | 30      | 17.1614 | 13.5473 | 14.4674 | 18.8367 | 18.9667 |
| 16.0591 | 30      | 17.941  | 12.4056 | 13.8957 | 20.9933 | 15.7551 |
| 15.6539 | 16.9639 | 17.425  | 13.06   | 14.3616 | 21.3825 | 18.0217 |
| 15.4167 | 30      | 30      | 13.9554 | 15.3276 | 23.0518 | 17.1524 |
| 16.7927 | 30      | 30      | 18.3883 | 18.6603 | 19.6673 | 23.699  |
| 17.2587 | 30      | 18.2156 | 13.9036 | 15.0136 | 30      | 18.2126 |
| 21.2942 | 17.2372 | 22.0148 | 15.8099 | 15.8301 | 30      | 21.2431 |
| 23.4274 | 30      | 22.1839 | 17.5492 | 18.3165 | 30      | 24.0746 |
| 16.1957 | 25.425  | 30      | 12.5271 | 13.9843 | 21.0522 | 19.6523 |
| 15.2748 | 26.1414 | 18.301  | 12.0687 | 13.2613 | 23.3265 | 16.5982 |
| 15.2628 | 17.6628 | 15.2878 | 12.3142 | 13.5705 | 22.4899 | 18.6166 |
| 19.0705 | 17.1922 | 16.5015 | 14.7077 | 15.6375 | 20.929  | 16.0225 |
| 15.8729 | 16.6108 | 15.8471 | 13.815  | 14.7542 | 19.5666 | 15.5579 |
| 16.1836 | 30      | 30      | 15.3332 | 15.1763 | 18.0428 | 17.8607 |
| 11.0826 | 14.3987 | 12.8488 | 11.1265 | 11.9706 | 23.7112 | 16.4466 |
| 14.7965 | 18.589  | 16.6014 | 14.7197 | 15.2502 | 17.7377 | 16.0539 |
| 15.3415 | 30      | 25.0635 | 13.2171 | 13.6039 | 30      | 17.448  |
| 12.0311 | 16.8571 | 13.4729 | 12.1163 | 12.9287 | 30      | 18.2226 |
| 15.6832 | 24.7765 | 16.3446 | 14.236  | 15.4945 | 18.5736 | 15.9323 |
| 16.5475 | 30      | 17.0355 | 12.5249 | 13.8119 | 30      | 18.1584 |
| 14.1321 | 14.5006 | 12.587  | 12.1246 | 13.5476 | 20.0748 | 16.5279 |
| 16.0026 | 30      | 30      | 13.6393 | 14.7754 | 19.3059 | 17.1412 |
| 11.6716 | 15.4357 | 13.7555 | 12.0756 | 13.0189 | 21.3844 | 18.7555 |
| 14.8347 | 26.6703 | 17.6458 | 14.6337 | 14.566  | 16.865  | 15.9244 |
| 13.736  | 18.5835 | 17.2127 | 13.608  | 14.08   | 18.4899 | 17.2073 |
| 17.1356 | 18.4053 | 15.2044 | 13.603  | 15.1298 | 24.8361 | 16.6954 |
| 16.1934 | 30      | 16.5376 | 13.9923 | 14.8487 | 19.3253 | 16.9348 |

|         |         |         |         |         |         |         |
|---------|---------|---------|---------|---------|---------|---------|
| 12.5923 | 15.9467 | 14.8373 | 13.1387 | 14.1018 | 23.2233 | 24.7902 |
| 16.341  | 23.7984 | 30      | 13.9894 | 14.715  | 22.9746 | 21.283  |
| 15.2778 | 16.1569 | 15.0801 | 12.8948 | 13.7105 | 18.0662 | 17.1114 |
| 16.2397 | 16.7783 | 18.0901 | 14.4472 | 14.784  | 20.3938 | 18.956  |
| 14.7386 | 30      | 30      | 12.7567 | 13.8456 | 17.7841 | 17.0523 |
| 15.4345 | 27.9842 | 18.1123 | 13.4888 | 13.774  | 30      | 18.3724 |
| 16.832  | 30      | 17.4827 | 14.3196 | 16.1978 | 19.3094 | 18.4766 |
| 14.5401 | 18.2865 | 16.5151 | 12.9744 | 13.1314 | 24.6159 | 19.9912 |
| 24.8523 | 25.3934 | 30      | 13.8    | 14.4019 | 23.8668 | 23.4266 |
| 16.7208 | 30      | 30      | 18.5878 | 20.0127 | 19.1292 | 16.4038 |
| 15.8071 | 18.772  | 16.867  | 14.106  | 14.6439 | 18.1488 | 16.6617 |
| 15.0968 | 18.5899 | 30      | 13.3998 | 14.4129 | 19.4812 | 17.3711 |

| Sirt3_A35 | Sirt3_A47 | Sox9_A59 | Sox9_A71 | Tat_A83 | Tat_A95 | Tcf4_A12 |
|-----------|-----------|----------|----------|---------|---------|----------|
| 18.16     | 30        | 30       | 30       | 30      | 30      | 17.3659  |
| 18.9815   | 18.1207   | 30       | 30       | 30      | 30      | 30       |
| 30        | 16.7519   | 30       | 30       | 30      | 30      | 16.98    |
| 18.8869   | 16.2974   | 30       | 30       | 30      | 30      | 15.7566  |
| 19.13     | 18.2534   | 30       | 30       | 30      | 30      | 18.6845  |
| 30        | 30        | 30       | 30       | 30      | 30      | 17.6722  |
| 17.7294   | 20.5375   | 30       | 30       | 30      | 30      | 15.5413  |
| 15.374    | 15.4255   | 11.547   | 20.9177  | 30      | 30      | 14.0738  |
| 18.8662   | 17.9593   | 30       | 30       | 30      | 30      | 17.9583  |
| 21.517    | 30        | 30       | 30       | 30      | 30      | 17.638   |
| 17.846    | 19.8435   | 12.0147  | 19.9506  | 30      | 30      | 16.5776  |
| 19.177    | 18.384    | 16.0399  | 27.0168  | 30      | 30      | 19.1802  |
| 19.6314   | 30        | 30       | 30       | 30      | 30      | 17.3627  |
| 17.7521   | 19.9719   | 30       | 30       | 30      | 30      | 15.3043  |
| 30        | 30        | 30       | 30       | 30      | 30      | 15.6766  |
| 17.7932   | 18.171    | 15.6886  | 24.0601  | 30      | 30      | 17.0677  |
| 18.8014   | 18.4305   | 30       | 30       | 30      | 30      | 17.4424  |
| 18.5665   | 18.2279   | 18.8025  | 30       | 30      | 30      | 15.7651  |
| 22.5768   | 30        | 30       | 30       | 30      | 30      | 16.0328  |
| 17.392    | 17.2607   | 30       | 30       | 30      | 30      | 16.1252  |
| 23.3036   | 19.0464   | 30       | 30       | 30      | 30      | 15.4589  |
| 18.5302   | 17.9761   | 18.8017  | 30       | 30      | 30      | 18.416   |
| 17.7068   | 19.0812   | 14.2173  | 23.4274  | 30      | 30      | 15.6253  |
| 15.84     | 15.4905   | 30       | 30       | 30      | 30      | 16.513   |
| 17.4855   | 16.8428   | 30       | 24.6385  | 30      | 30      | 15.4115  |
| 30        | 30        | 30       | 30       | 30      | 30      | 16.2929  |
| 18.9983   | 30        | 30       | 30       | 30      | 30      | 15.4753  |
| 30        | 19.9411   | 30       | 30       | 30      | 30      | 22.1859  |
| 30        | 30        | 30       | 30       | 30      | 30      | 16.0033  |
| 26.415    | 30        | 30       | 30       | 30      | 30      | 30       |
| 25.8646   | 20.376    | 21.3178  | 30       | 30      | 30      | 20.3385  |
| 16.7036   | 15.7999   | 30       | 30       | 30      | 30      | 15.5147  |
| 30        | 18.1853   | 18.1639  | 30       | 30      | 30      | 18.4222  |
| 16.244    | 16.3759   | 30       | 27.9331  | 30      | 30      | 15.1986  |
| 17.1367   | 22.1223   | 30       | 30       | 30      | 30      | 15.7521  |
| 30        | 18.4524   | 30       | 30       | 30      | 30      | 17.2641  |
| 16.8982   | 17.1978   | 30       | 30       | 30      | 30      | 17.9011  |
| 30        | 18.4747   | 17.9457  | 30       | 30      | 30      | 16.9141  |
| 25.162    | 18.4587   | 30       | 30       | 30      | 30      | 14.9673  |
| 17.6499   | 17.5835   | 17.9241  | 30       | 30      | 30      | 16.2557  |

|         |         |         |         |         |    |         |
|---------|---------|---------|---------|---------|----|---------|
| 18.2193 | 17.749  | 13.6976 | 25.637  | 30      | 30 | 16.2682 |
| 17.661  | 16.6576 | 30      | 30      | 30      | 30 | 17.7621 |
| 30      | 30      | 30      | 30      | 27.1762 | 30 | 16.3474 |
| 17.2932 | 17.6287 | 18.7984 | 30      | 30      | 30 | 17.7348 |
| 19.9949 | 17.4033 | 30      | 30      | 30      | 30 | 30      |
| 24.3142 | 18.2201 | 30      | 30      | 30      | 30 | 17.3235 |
| 16.169  | 15.3525 | 18.7618 | 30      | 30      | 30 | 14.6227 |
| 18.574  | 17.6556 | 30      | 30      | 30      | 30 | 17.0714 |
| 30      | 16.8483 | 15.3281 | 25.0391 | 30      | 30 | 14.544  |
| 19.3939 | 18.3366 | 18.9556 | 30      | 30      | 30 | 30      |
| 18.8549 | 16.9835 | 30      | 30      | 30      | 30 | 16.2644 |
| 30      | 18.3728 | 17.2364 | 30      | 30      | 30 | 17.5195 |
| 17.1306 | 16.6485 | 30      | 30      | 18.5864 | 30 | 20.5423 |
| 19.495  | 17.2961 | 18.6938 | 30      | 30      | 30 | 14.4928 |
| 30      | 30      | 16.8804 | 30      | 30      | 30 | 14.9965 |
| 19.5189 | 18.5074 | 14.1596 | 22.9932 | 30      | 30 | 14.6324 |
| 19.2093 | 17.121  | 30      | 30      | 30      | 30 | 16.6003 |
| 18.7541 | 18.5402 | 30      | 30      | 30      | 30 | 17.1909 |
| 30      | 30      | 30      | 30      | 30      | 30 | 30      |
| 30      | 30      | 30      | 30      | 30      | 30 | 16.0713 |
| 30      | 24.4332 | 19.1765 | 30      | 30      | 30 | 26.6466 |
| 30      | 27.4224 | 30      | 30      | 30      | 30 | 23.1256 |
| 30      | 30      | 30      | 30      | 30      | 30 | 15.3934 |
| 22.8661 | 22.9761 | 13.9505 | 21.2397 | 30      | 30 | 14.7921 |
| 20.6937 | 18.3299 | 30      | 22.8733 | 30      | 30 | 16.4554 |
| 30      | 17.0124 | 30      | 28.6812 | 30      | 30 | 16.4216 |
| 30      | 18.5944 | 18.8507 | 30      | 30      | 30 | 14.6233 |
| 30      | 30      | 30      | 30      | 30      | 30 | 30      |
| 16.8149 | 16.6134 | 12.8928 | 22.3919 | 27.8445 | 30 | 14.0203 |
| 19.2325 | 17.6376 | 19.0105 | 30      | 30      | 30 | 18.7077 |
| 30      | 17.9614 | 30      | 30      | 25.9164 | 30 | 15.9896 |
| 17.0573 | 16.9201 | 13.0558 | 24.1862 | 30      | 30 | 16.2721 |
| 26.8877 | 18.4161 | 30      | 30      | 28.1272 | 30 | 16.2494 |
| 18.1672 | 17.8576 | 13.1119 | 22.4459 | 30      | 30 | 15.5207 |
| 22.6772 | 19.1759 | 16.7569 | 30      | 30      | 30 | 16.5816 |
| 30      | 30      | 30      | 30      | 23.6987 | 30 | 30      |
| 16.7978 | 16.4141 | 14.0509 | 24.1539 | 30      | 30 | 15.7918 |
| 30      | 30      | 30      | 30      | 30      | 30 | 17.114  |
| 18.7766 | 17.3004 | 15.1826 | 23.9247 | 30      | 30 | 15.6497 |
| 17.7955 | 27.4612 | 30      | 30      | 24.3516 | 30 | 25.2191 |
| 20.8562 | 30      | 30      | 30      | 27.9872 | 30 | 15.2916 |

|         |         |         |         |         |    |         |
|---------|---------|---------|---------|---------|----|---------|
| 17.1334 | 17.8427 | 13.1252 | 22.3574 | 27.4557 | 30 | 16.8896 |
| 30      | 28.6039 | 18.1128 | 24.2853 | 25.5204 | 30 | 30      |
| 16.8898 | 16.3363 | 30      | 30      | 30      | 30 | 15.5917 |
| 30      | 18.1406 | 30      | 30      | 30      | 30 | 16.217  |
| 30      | 17.2166 | 15.6565 | 25.1943 | 26.8669 | 30 | 30      |
| 17.4401 | 16.7279 | 30      | 30      | 30      | 30 | 16.3923 |
| 21.0616 | 30      | 30      | 30      | 30      | 30 | 30      |
| 21.085  | 18.3529 | 12.6526 | 21.6018 | 30      | 30 | 15.0738 |
| 18.9207 | 18.3988 | 17.8629 | 30      | 30      | 30 | 17.4946 |
| 21.5841 | 30      | 30      | 27.9355 | 30      | 30 | 30      |
| 30      | 17.3831 | 30      | 30      | 30      | 30 | 14.9801 |
| 30      | 30      | 30      | 30      | 30      | 30 | 14.5315 |

| Tcf7l2_A24 | Tert_A36 | Tert_A48 | Wnt3_A60 | Wnt3_A72 | Wnt6_A84 | Wnt6_A96 |
|------------|----------|----------|----------|----------|----------|----------|
| 22.1156    | 30       | 30       | 30       | 24.8178  | 30       | 30       |
| 30         | 30       | 30       | 30       | 30       | 30       | 26.8949  |
| 17.5743    | 30       | 30       | 30       | 30       | 21.0233  | 24.0503  |
| 17.6747    | 30       | 30       | 30       | 21.7899  | 20.6664  | 22.9735  |
| 20.5753    | 30       | 30       | 30       | 30       | 18.9312  | 20.3358  |
| 21.658     | 30       | 30       | 30       | 30       | 30       | 24.7841  |
| 19.966     | 26.0487  | 30       | 30       | 30       | 21.4394  | 20.7627  |
| 17.2026    | 16.6173  | 17.9421  | 30       | 30       | 30       | 24.5017  |
| 19.2869    | 30       | 30       | 26.6945  | 22.6401  | 30       | 30       |
| 21.2789    | 30       | 30       | 30       | 30       | 30       | 30       |
| 18.2858    | 16.2319  | 19.0053  | 15.9564  | 17.5959  | 30       | 30       |
| 18.7128    | 30       | 30       | 30       | 30       | 30       | 30       |
| 18.5707    | 30       | 30       | 30       | 30       | 30       | 24.5317  |
| 19.9125    | 30       | 30       | 30       | 19.311   | 20.2421  | 21.7623  |
| 21.0729    | 30       | 30       | 30       | 30       | 30       | 30       |
| 18.7129    | 30       | 30       | 14.7774  | 14.8756  | 30       | 30       |
| 30         | 30       | 30       | 30       | 18.9455  | 30       | 22.5479  |
| 18.6433    | 30       | 30       | 30       | 21.2832  | 30       | 30       |
| 18.897     | 30       | 30       | 30       | 30       | 30       | 30       |
| 18.2136    | 30       | 30       | 30       | 30       | 20.5858  | 30       |
| 19.2814    | 30       | 30       | 30       | 30       | 22.3503  | 30       |
| 19.1686    | 30       | 30       | 17.1375  | 17.6643  | 30       | 30       |
| 17.9141    | 17.6346  | 18.3029  | 30       | 30       | 30       | 30       |
| 18.6371    | 30       | 30       | 30       | 26.8227  | 19.0635  | 22.7959  |
| 18.6367    | 30       | 30       | 30       | 19.2609  | 30       | 26.3893  |
| 18.9644    | 30       | 30       | 30       | 30       | 30       | 30       |
| 18.9258    | 30       | 30       | 30       | 24.0193  | 30       | 25.0098  |
| 24.6014    | 30       | 30       | 30       | 30       | 30       | 30       |
| 21.4466    | 30       | 30       | 30       | 30       | 30       | 30       |
| 25.9697    | 30       | 30       | 30       | 26.0434  | 30       | 30       |
| 25.6664    | 30       | 30       | 30       | 30       | 30       | 30       |
| 18.9429    | 30       | 30       | 30       | 24.1451  | 30       | 26.4742  |
| 21.3869    | 30       | 30       | 30       | 22.1696  | 30       | 30       |
| 18.1747    | 30       | 30       | 30       | 30       | 30       | 30       |
| 18.1999    | 30       | 30       | 30       | 30       | 20.4299  | 21.9013  |
| 21.9231    | 30       | 30       | 30       | 30       | 30       | 30       |
| 19.0388    | 30       | 30       | 30       | 30       | 30       | 30       |
| 20.067     | 30       | 30       | 30       | 25.7237  | 30       | 30       |
| 18.2092    | 30       | 30       | 30       | 25.7974  | 30       | 30       |
| 19.1023    | 30       | 30       | 28.2251  | 18.5751  | 20.8792  | 26.0012  |

|         |         |         |         |         |         |         |
|---------|---------|---------|---------|---------|---------|---------|
| 19.9373 | 30      | 30      | 30      | 30      | 30      | 30      |
| 20.5145 | 30      | 30      | 30      | 30      | 20.5561 | 27.8373 |
| 19.3017 | 30      | 30      | 30      | 27.9999 | 19.1788 | 28.2987 |
| 19.2382 | 30      | 30      | 30      | 18.6887 | 30      | 30      |
| 22.0501 | 30      | 30      | 30      | 30      | 30      | 30      |
| 24.019  | 30      | 30      | 30      | 30      | 30      | 24.943  |
| 18.0729 | 30      | 30      | 30      | 30      | 30      | 30      |
| 20.4452 | 30      | 30      | 30      | 25.2023 | 30      | 30      |
| 17.4227 | 30      | 30      | 17.7899 | 30      | 30      | 25.3715 |
| 20.0474 | 30      | 30      | 30      | 20.0235 | 30      | 30      |
| 19.3587 | 30      | 30      | 30      | 30      | 30      | 30      |
| 30      | 30      | 30      | 30      | 30      | 30      | 25.1022 |
| 19.6706 | 30      | 30      | 30      | 30      | 30      | 30      |
| 18.5453 | 30      | 30      | 30      | 30      | 20.6048 | 25.0403 |
| 17.2543 | 30      | 30      | 30      | 18.6968 | 30      | 30      |
| 19.3633 | 30      | 30      | 13.4439 | 14.6326 | 30      | 24.3495 |
| 19.4513 | 30      | 30      | 30      | 30      | 30      | 30      |
| 22.0212 | 30      | 30      | 30      | 30      | 30      | 22.3739 |
| 30      | 30      | 30      | 30      | 24.1633 | 30      | 30      |
| 25.5568 | 30      | 30      | 30      | 30      | 30      | 30      |
| 30      | 30      | 30      | 30      | 30      | 30      | 30      |
| 30      | 30      | 30      | 30      | 30      | 30      | 30      |
| 19.0164 | 30      | 30      | 30      | 30      | 30      | 30      |
| 18.2998 | 30      | 30      | 13.0548 | 14.3618 | 30      | 25.7199 |
| 20.2567 | 30      | 30      | 30      | 30      | 30      | 30      |
| 19.0662 | 30      | 30      | 30      | 25.1314 | 30      | 24.245  |
| 20.3888 | 24.7146 | 30      | 30      | 30      | 30      | 30      |
| 30      | 24.0191 | 28.4085 | 30      | 30      | 30      | 30      |
| 17.071  | 23.6784 | 30      | 30      | 30      | 30      | 22.7397 |
| 19.2188 | 23.7588 | 30      | 30      | 27.2577 | 30      | 23.6706 |
| 17.136  | 30      | 30      | 28.2812 | 30      | 21.1749 | 23.1962 |
| 19.3434 | 30      | 19.3977 | 30      | 30      | 30      | 26.5824 |
| 18.7582 | 30      | 30      | 26.8408 | 30      | 21.9747 | 24.6293 |
| 18.8723 | 30      | 30      | 13.4852 | 15.6492 | 30      | 30      |
| 18.7838 | 16.8816 | 19.4937 | 30      | 22.9453 | 20.7605 | 22.4808 |
| 30      | 25.6173 | 30      | 30      | 30      | 30      | 24.3375 |
| 19.2668 | 18.249  | 30      | 30      | 27.7755 | 30      | 25.6889 |
| 20.4749 | 23.5157 | 30      | 30      | 30      | 30      | 22.9032 |
| 19.9103 | 30      | 30      | 30      | 24.5156 | 30      | 30      |
| 19.81   | 30      | 30      | 28.4546 | 30      | 20.2074 | 30      |
| 19.3749 | 30      | 30      | 25.7104 | 30      | 30      | 30      |



|         |         |         |         |         |         |         |
|---------|---------|---------|---------|---------|---------|---------|
| 23.0616 | 30      | 30      | 30      | 30      | 30      | 25.7389 |
| 30      | 30      | 30      | 17.7488 | 30      | 30      | 22.9282 |
| 17.7237 | 26.2941 | 28.2658 | 30      | 30      | 30      | 30      |
| 19.5636 | 30      | 30      | 30      | 30      | 30      | 30      |
| 21.9827 | 18.935  | 30      | 27.6738 | 30      | 30      | 30      |
| 19.3346 | 30      | 30      | 30      | 30      | 30      | 27.0922 |
| 22.1804 | 24.5302 | 30      | 30      | 30      | 30      | 30      |
| 18.0611 | 30      | 30      | 26.7379 | 26.8146 | 30      | 30      |
| 21.9801 | 30      | 30      | 30      | 30      | 30      | 30      |
| 30      | 30      | 30      | 30      | 25.168  | 30      | 30      |
| 20.741  | 30      | 30      | 30      | 22.0645 | 21.4832 | 25.9654 |
| 17.6102 | 26.1663 | 30      | 30      | 30      | 30      | 30      |

| sampleID | Group | Areg_A01 | Areg_A13 | Ascl2_A25 | Ascl2_A37 | Atoh1_A49 |
|----------|-------|----------|----------|-----------|-----------|-----------|
| S09      | Lgr5  | 30       | 30       | 18.957    | 30        | 30        |
| S10      | Lgr5  | 30       | 30       | 15.0865   | 30        | 18.556    |
| S11      | Lgr5  | 30       | 30       | 15.9102   | 17.302    | 18.7122   |
| S12      | Lgr5  | 30       | 30       | 13.8043   | 15.2774   | 24.8121   |
| S21      | Lgr5  | 30       | 30       | 15.3758   | 17.6526   | 26.0887   |
| S22      | Lgr5  | 30       | 30       | 13.8888   | 14.1429   | 13.195    |
| S23      | Lgr5  | 30       | 30       | 12.7713   | 14.3285   | 18.1081   |
| S24      | Lgr5  | 30       | 30       | 30        | 30        | 30        |
| S33      | Lgr5  | 30       | 27.219   | 16.1916   | 19.103    | 22.7134   |
| S34      | Lgr5  | 30       | 30       | 13.7526   | 18.5272   | 30        |
| S35      | Lgr5  | 30       | 30       | 12.4015   | 12.9394   | 24.515    |
| S36      | Lgr5  | 30       | 30       | 16.5837   | 30        | 18.1394   |
| S45      | Lgr5  | 30       | 30       | 16.1833   | 16.5899   | 30        |
| S46      | Lgr5  | 30       | 30       | 14.6126   | 16.015    | 17.1337   |
| S47      | Lgr5  | 30       | 30       | 14.3778   | 16.8787   | 17.704    |
| S48      | Lgr5  | 30       | 30       | 17.1716   | 30        | 18.0544   |
| S57      | Lgr5  | 30       | 19.2448  | 16.0531   | 19.2354   | 30        |
| S58      | Lgr5  | 30       | 30       | 14.3931   | 14.9212   | 18.4509   |
| S59      | Lgr5  | 30       | 30       | 13.8554   | 14.6674   | 18.1149   |
| S60      | Lgr5  | 30       | 30       | 15.2777   | 16.5841   | 18.5621   |
| S69      | Lgr5  | 30       | 17.1787  | 14.7771   | 15.1345   | 30        |
| S70      | Lgr5  | 30       | 30       | 16.1648   | 18.7657   | 30        |
| S71      | Lgr5  | 30       | 30       | 30        | 30        | 17.4886   |
| S72      | Lgr5  | 30       | 30       | 14.739    | 17.6964   | 16.1457   |
| S81      | Lgr5  | 30       | 30       | 16.8165   | 30        | 30        |
| S82      | Lgr5  | 30       | 30       | 14.1832   | 30        | 30        |
| S83      | Lgr5  | 30       | 30       | 15.1654   | 30        | 17.9787   |
| S84      | Lgr5  | 30       | 30       | 15.2112   | 19.9331   | 30        |
| S93      | Lgr5  | 30       | 30       | 30        | 30        | 17.9278   |
| S94      | Lgr5  | 30       | 30       | 16.0087   | 30        | 30        |
| S95      | Lgr5  | 30       | 30       | 13.322    | 14.849    | 19.1346   |
| S09      | Lgr5  | 30       | 30       | 15.0694   | 15.9837   | 23.6315   |
| S10      | Lgr5  | 30       | 30       | 30        | 30        | 18.849    |
| S11      | Lgr5  | 30       | 30       | 16.3194   | 30        | 30        |
| S12      | Lgr5  | 30       | 30       | 14.4275   | 15.4719   | 30        |
| S21      | Lgr5  | 30       | 27.2851  | 16.7551   | 16.9193   | 21.2112   |
| S22      | Lgr5  | 30       | 30       | 14.184    | 14.7205   | 19.4884   |
| S23      | Lgr5  | 30       | 30       | 13.5218   | 15.5494   | 19.2231   |
| S24      | Lgr5  | 30       | 18.4395  | 30        | 30        | 17.2724   |
| S33      | Lgr5  | 30       | 30       | 15.5237   | 16.0552   | 18.1682   |

|     |      |         |         |         |         |         |
|-----|------|---------|---------|---------|---------|---------|
| S34 | Lgr5 | 30      | 27.2125 | 17.4914 | 17.7782 | 17.6351 |
| S35 | Lgr5 | 30      | 30      | 30      | 30      | 18.4775 |
| S36 | Lgr5 | 30      | 30      | 30      | 30      | 17.1516 |
| S45 | Lgr5 | 30      | 30      | 14.6936 | 17.0107 | 17.7528 |
| S46 | Lgr5 | 30      | 30      | 30      | 30      | 19.3572 |
| S47 | Lgr5 | 30      | 26.2458 | 16.0596 | 16.4473 | 30      |
| S48 | Lgr5 | 28.4332 | 20.2223 | 17.8643 | 19.023  | 30      |
| S57 | Lgr5 | 30      | 30      | 15.7259 | 30      | 17.8656 |
| S58 | Lgr5 | 30      | 30      | 30      | 30      | 30      |
| S59 | Lgr5 | 30      | 30      | 30      | 30      | 14.2473 |
| S60 | Lgr5 | 30      | 24.7382 | 15.7119 | 30      | 19.4891 |
| S69 | Lgr5 | 30      | 30      | 13.7117 | 14.6573 | 16.5468 |
| S70 | Lgr5 | 30      | 30      | 14.3306 | 15.9048 | 26.2622 |
| S71 | Lgr5 | 30      | 30      | 14.762  | 15.2912 | 30      |
| S72 | Lgr5 | 30      | 30      | 30      | 30      | 15.4123 |
| S81 | Lgr5 | 30      | 30      | 13.5806 | 15.0435 | 17.6277 |
| S82 | Lgr5 | 30      | 30      | 14.5322 | 18.2083 | 17.0015 |
| S83 | Lgr5 | 30      | 30      | 30      | 30      | 21.5096 |
| S93 | Lgr5 | 30      | 30      | 30      | 30      | 14.1006 |
| S94 | Lgr5 | 30      | 30      | 18.4218 | 30      | 18.8966 |
| S95 | Lgr5 | 30      | 30      | 14.8878 | 30      | 18.6246 |
| S09 | Lgr5 | 30      | 30      | 14.9883 | 17.1004 | 17.5286 |

| Atoh1_A61 | Axin2_A73 | Axin2_A85 | Bmi1_A02 | Bmi1_A14 | Bmpr1a_A26 | Bmpr1a_A38 |
|-----------|-----------|-----------|----------|----------|------------|------------|
| 30        | 13.2566   | 16.3814   | 15.4587  | 16.3376  | 15.5658    | 16.3309    |
| 20.7735   | 11.6071   | 14.5132   | 16.0412  | 15.7601  | 14.3761    | 15.3222    |
| 18.5708   | 12.9237   | 16.4775   | 15.3909  | 16.8055  | 15.9932    | 16.6093    |
| 18.1202   | 12.5304   | 16.5133   | 13.7344  | 14.1332  | 13.3747    | 14.4623    |
| 21.024    | 11.2578   | 13.669    | 16.7713  | 15.2915  | 14.1687    | 14.328     |
| 13.3389   | 12.166    | 14.5321   | 14.9572  | 14.3907  | 13.8304    | 15.1616    |
| 18.9004   | 11.7443   | 14.481    | 15.024   | 14.668   | 15.2806    | 14.8025    |
| 30        | 21.1181   | 30        | 30       | 30       | 18.3884    | 17.9678    |
| 22.9537   | 12.8791   | 15.6684   | 14.9257  | 16.0463  | 14.5469    | 15.7526    |
| 26.8895   | 12.2967   | 15.2176   | 15.158   | 14.2087  | 13.9854    | 14.6968    |
| 30        | 10.6049   | 12.7501   | 15.4763  | 14.1894  | 13.6599    | 14.6091    |
| 16.4897   | 12.046    | 15.1662   | 16.8182  | 15.0259  | 15.5441    | 16.6557    |
| 30        | 12.632    | 15.6289   | 14.5454  | 15.4416  | 15.5055    | 15.7314    |
| 17.5552   | 12.7367   | 15.4568   | 16.7024  | 15.4939  | 15.2243    | 15.7805    |
| 30        | 12.0092   | 14.9145   | 12.8127  | 13.0204  | 12.9337    | 13.9892    |
| 19.201    | 14.6908   | 17.1327   | 21.5352  | 23.9601  | 16.1501    | 16.0628    |
| 30        | 12.1428   | 14.2017   | 17.1004  | 17.0794  | 15.1615    | 15.1438    |
| 30        | 11.9035   | 13.848    | 13.2751  | 13.5325  | 12.4396    | 13.4479    |
| 17.7485   | 12.0043   | 14.1546   | 16.3405  | 15.2629  | 13.4257    | 14.1418    |
| 18.3385   | 13.0568   | 15.5892   | 14.0548  | 14.2639  | 13.3862    | 13.9533    |
| 30        | 13.9685   | 16.1301   | 30       | 30       | 16.3921    | 18.5733    |
| 30        | 12.6368   | 14.8702   | 14.1946  | 15.3192  | 14.6217    | 15.9573    |
| 18.438    | 17.0871   | 20.3374   | 30       | 15.1893  | 30         | 18.6778    |
| 18.1649   | 15.3804   | 17.7186   | 21.8666  | 17.7797  | 15.9421    | 17.1639    |
| 30        | 12.9905   | 15.2807   | 16.0014  | 14.8767  | 15.5596    | 15.8773    |
| 30        | 12.6811   | 14.8342   | 16.0795  | 15.324   | 15.0979    | 16.3926    |
| 20.8335   | 13.1734   | 15.2589   | 17.9076  | 15.7815  | 16.4893    | 19.4173    |
| 30        | 19.6439   | 30        | 20.3561  | 21.8412  | 22.3973    | 25.3777    |
| 18.2945   | 17.1167   | 25.1985   | 20.5776  | 30       | 14.0938    | 14.2213    |
| 30        | 12.7642   | 15.9902   | 16.4665  | 17.6583  | 15.3645    | 17.0326    |
| 18.4846   | 13.7337   | 18.1364   | 14.3815  | 16.8854  | 18.0884    | 18.3998    |
| 24.1557   | 12.4933   | 15.4385   | 15.7057  | 16.1517  | 14.4603    | 15.4101    |
| 18.596    | 14.6591   | 18.3879   | 15.7052  | 16.6452  | 15.1707    | 16.2545    |
| 17.4848   | 12.9158   | 16.7444   | 15.1305  | 16.6846  | 16.8251    | 18.0359    |
| 30        | 12.3636   | 15.7712   | 14.2834  | 13.9818  | 13.846     | 15.1668    |
| 26.103    | 11.5104   | 13.84     | 15.7444  | 15.1218  | 13.3912    | 14.3147    |
| 19.8508   | 11.1173   | 13.2877   | 15.5118  | 14.6771  | 14.9312    | 15.4783    |
| 22.725    | 11.3407   | 13.7722   | 14.3774  | 14.161   | 13.3918    | 14.3025    |
| 17.2395   | 13.4375   | 16.6089   | 15.3783  | 14.9957  | 13.8055    | 14.7635    |
| 18.1567   | 12.3126   | 14.5045   | 15.3336  | 15.2037  | 14.7011    | 15.3943    |

|         |         |         |         |         |         |         |
|---------|---------|---------|---------|---------|---------|---------|
| 18.0501 | 13.265  | 15.4248 | 14.7731 | 14.8761 | 15.3845 | 15.1368 |
| 25.1158 | 14.1438 | 16.5245 | 15.1184 | 14.7464 | 13.0391 | 13.5396 |
| 16.7631 | 12.2664 | 15.4519 | 18.0722 | 16.7196 | 15.8768 | 16.1107 |
| 19.0025 | 12.7142 | 15.153  | 18.9459 | 17.0367 | 16.3934 | 16.8397 |
| 30      | 30      | 30      | 17.2917 | 16.6062 | 13.9597 | 14.2998 |
| 30      | 12.5271 | 15.0914 | 15.0202 | 17.7573 | 14.505  | 15.1361 |
| 30      | 12.1942 | 14.2185 | 14.9711 | 13.986  | 14.3961 | 15.1982 |
| 17.1719 | 13.0082 | 15.2958 | 16.6448 | 17.5209 | 15.4102 | 17.5783 |
| 30      | 15.1067 | 17.001  | 16.0215 | 16.1296 | 14.707  | 15.0993 |
| 13.913  | 16.8286 | 19.3676 | 15.6682 | 16.0314 | 14.4723 | 14.6084 |
| 20.456  | 12.6952 | 14.6059 | 15.4386 | 14.2931 | 13.4424 | 14.0058 |
| 16.8827 | 11.452  | 13.3409 | 14.6471 | 14.2263 | 13.397  | 14.1622 |
| 30      | 12.2824 | 14.3467 | 14.6059 | 14.0131 | 13.4533 | 14.266  |
| 30      | 13.5488 | 15.9001 | 15.6437 | 14.9182 | 14.8765 | 15.4474 |
| 14.8283 | 17.0493 | 18.4627 | 15.9943 | 14.9183 | 16.1184 | 18.6978 |
| 17.7086 | 11.3329 | 13.8955 | 14.9048 | 14.8208 | 13.9867 | 15.0874 |
| 17.7492 | 11.9167 | 14.7521 | 15.1262 | 14.5739 | 14.0194 | 15.2258 |
| 17.7744 | 14.9909 | 18.2492 | 15.2291 | 14.1734 | 13.682  | 13.9208 |
| 14.39   | 16.8362 | 19.6361 | 16.4738 | 17.8639 | 16.7179 | 16.1461 |
| 20.663  | 13.0837 | 16.0916 | 16.0382 | 16.7885 | 14.8432 | 15.8349 |
| 30      | 12.9398 | 16.6227 | 21.9141 | 18.4522 | 15.934  | 16.1592 |
| 17.8267 | 11.8129 | 13.8042 | 14.8204 | 14.5193 | 14.6709 | 15.4161 |

| Ccnd1_A50 | Ccnd1_A62 | Cdkn1a_A74 | Cdkn1a_A86 | Cdx1_A03 | Cdx1_A15 | Chga_A27 |
|-----------|-----------|------------|------------|----------|----------|----------|
| 17.5141   | 13.6997   | 18.9082    | 30         | 19.5842  | 17.4822  | 30       |
| 16.4533   | 13.3363   | 30         | 30         | 18.7095  | 16.8644  | 30       |
| 15.9446   | 12.9893   | 30         | 30         | 18.8679  | 16.1426  | 30       |
| 15.1279   | 14.0505   | 16.9256    | 14.9972    | 17.0705  | 14.5845  | 30       |
| 16.201    | 13.3189   | 30         | 30         | 17.2923  | 15.4661  | 30       |
| 13.8439   | 11.4943   | 30         | 20.2059    | 16.5911  | 14.9346  | 30       |
| 15.8293   | 13.443    | 15.437     | 14.7324    | 18.9238  | 16.1388  | 30       |
| 30        | 30        | 16.4022    | 16.1761    | 20.27    | 16.9977  | 30       |
| 15.6433   | 12.1141   | 24.7745    | 18.1539    | 17.5661  | 15.755   | 30       |
| 17.6962   | 14.9672   | 30         | 30         | 17.6906  | 15.5172  | 17.8716  |
| 15.7105   | 12.6428   | 30         | 30         | 16.8823  | 15.0066  | 18.8186  |
| 14.5535   | 11.6817   | 21.1857    | 17.6992    | 16.5095  | 14.3683  | 30       |
| 18.9128   | 15.4967   | 17.066     | 17.1841    | 17.3093  | 14.9253  | 30       |
| 15.2067   | 13.2259   | 30         | 30         | 19.6175  | 17.014   | 30       |
| 14.8811   | 11.9835   | 15.1234    | 14.7622    | 15.5676  | 13.3409  | 30       |
| 17.7625   | 15.6883   | 18.9845    | 30         | 19.7374  | 17.8125  | 30       |
| 18.1956   | 17.158    | 23.7304    | 20.13      | 19.0371  | 16.3049  | 18.6066  |
| 15.4616   | 12.8525   | 18.1076    | 18.4874    | 16.4946  | 15.0221  | 30       |
| 16.7246   | 13.7135   | 19.8949    | 17.784     | 18.1152  | 15.8219  | 30       |
| 15.0317   | 13.5962   | 30         | 21.5164    | 16.7316  | 14.5296  | 30       |
| 16.4464   | 15.9186   | 30         | 30         | 18.4424  | 19.7387  | 30       |
| 18.3016   | 14.699    | 30         | 30         | 19.0521  | 17.8641  | 30       |
| 30        | 30        | 15.6417    | 15.8797    | 18.7847  | 16.473   | 30       |
| 30        | 25.0393   | 15.7704    | 15.9726    | 19.3797  | 17.1235  | 30       |
| 16.8399   | 14.3986   | 30         | 30         | 21.5293  | 21.2039  | 30       |
| 19.0883   | 14.8785   | 18.2849    | 19.6748    | 19.1219  | 17.0097  | 30       |
| 18.1865   | 14.5392   | 30         | 20.7131    | 18.8318  | 17.4527  | 30       |
| 21.32     | 15.2664   | 23.7523    | 20.7182    | 24.7119  | 20.5781  | 30       |
| 30        | 18.5121   | 14.319     | 15.1845    | 21.9388  | 20.5386  | 13.6688  |
| 15.2653   | 13.4359   | 30         | 30         | 20.1251  | 18.716   | 30       |
| 16.666    | 13.5599   | 20.8146    | 19.5468    | 21.0623  | 17.7585  | 30       |
| 18.0922   | 15.5344   | 22.173     | 18.0018    | 19.5778  | 18.0862  | 30       |
| 30        | 30        | 20.6702    | 17.7756    | 21.1282  | 20.8752  | 14.3499  |
| 16.9707   | 13.3127   | 30         | 21.7696    | 20.7574  | 17.6017  | 30       |
| 16.6218   | 14.3801   | 30         | 30         | 19.0389  | 16.5339  | 30       |
| 15.3578   | 12.5484   | 18.4375    | 30         | 16.7621  | 15.2984  | 30       |
| 16.6101   | 14.5404   | 20.0737    | 19.8907    | 17.775   | 15.2369  | 30       |
| 15.3646   | 12.4948   | 17.1429    | 20.1614    | 16.61    | 14.9947  | 30       |
| 19.124    | 15.0972   | 30         | 30         | 18.2074  | 16.1663  | 30       |
| 17.0749   | 14.3549   | 30         | 30         | 20.0356  | 17.2312  | 30       |

|         |         |         |         |         |         |         |
|---------|---------|---------|---------|---------|---------|---------|
| 18.3871 | 15.3988 | 18.9748 | 20.4866 | 18.8438 | 16.4776 | 30      |
| 13.8058 | 11.3244 | 17.8698 | 18.6642 | 17.008  | 14.6789 | 30      |
| 16.9573 | 13.2504 | 19.1568 | 17.1996 | 19.2226 | 16.2261 | 30      |
| 17.8146 | 14.6261 | 17.3406 | 17.2115 | 19.8379 | 17.0554 | 30      |
| 18.363  | 16.3862 | 16.3977 | 15.7666 | 18.7172 | 16.2845 | 30      |
| 17.4062 | 14.3814 | 17.8231 | 30      | 18.4738 | 16.7662 | 19.22   |
| 17.0979 | 14.5955 | 17.7046 | 17.3413 | 17.3218 | 16.154  | 30      |
| 19.403  | 17.302  | 30      | 23.6042 | 19.5967 | 17.3782 | 30      |
| 16.1779 | 14.1413 | 17.886  | 18.7936 | 18.2893 | 15.8754 | 30      |
| 16.8876 | 14.1348 | 18.4126 | 17.3259 | 16.7322 | 14.9777 | 30      |
| 18.5425 | 15.5357 | 30      | 30      | 18.7811 | 16.7154 | 30      |
| 17.7463 | 14.8695 | 30      | 20.2634 | 18.3685 | 16.2866 | 30      |
| 15.5741 | 13.169  | 16.0742 | 16.1001 | 16.7233 | 15.5205 | 30      |
| 15.9244 | 14.1208 | 18.1472 | 20.3799 | 18.3848 | 17.0526 | 30      |
| 30      | 18.224  | 16.6761 | 16.7464 | 19.88   | 18.4785 | 30      |
| 14.9369 | 12.4632 | 17.4029 | 18.8143 | 18.2782 | 15.9905 | 30      |
| 15.2454 | 13.0163 | 27.0052 | 18.3691 | 17.5129 | 15.347  | 19.0861 |
| 14.7419 | 12.0292 | 17.6508 | 17.9544 | 17.2665 | 15.7597 | 19.1478 |
| 18.8532 | 15.5665 | 17.5649 | 15.9502 | 20.3973 | 17.6689 | 30      |
| 18.066  | 16.2063 | 19.8932 | 19.31   | 20.0688 | 18.5793 | 30      |
| 18.6404 | 15.6859 | 18.6067 | 19.3364 | 19.089  | 18.017  | 30      |
| 18.2236 | 13.7611 | 18.6384 | 30      | 19.1606 | 18.8045 | 30      |

| Chga_A39 | Cubn_A51 | Cubn_A63 | DII4_A75 | DII4_A87 | Dvl2_A04 | Dvl2_A16 |
|----------|----------|----------|----------|----------|----------|----------|
| 30       | 30       | 30       | 16.2901  | 17.0106  | 30       | 18.115   |
| 30       | 30       | 30       | 30       | 30       | 18.8018  | 18.5731  |
| 30       | 30       | 30       | 30       | 30       | 17.4774  | 30       |
| 30       | 30       | 30       | 17.5574  | 20.7726  | 18.72    | 16.3983  |
| 30       | 30       | 30       | 30       | 30       | 17.5354  | 30       |
| 30       | 30       | 30       | 15.313   | 17.1968  | 20.9792  | 16.5624  |
| 30       | 30       | 30       | 18.8671  | 18.6447  | 19.4326  | 19.1833  |
| 30       | 30       | 30       | 30       | 30       | 19.0067  | 17.1375  |
| 30       | 30       | 30       | 30       | 30       | 17.5995  | 17.4783  |
| 19.2358  | 30       | 30       | 30       | 30       | 18.9336  | 16.7527  |
| 30       | 30       | 30       | 20.2229  | 30       | 30       | 17.9291  |
| 30       | 30       | 26.2295  | 30       | 30       | 19.6112  | 17.6809  |
| 30       | 30       | 23.0238  | 18.9876  | 30       | 30       | 17.3938  |
| 30       | 30       | 30       | 18.9706  | 30       | 20.5158  | 30       |
| 30       | 30       | 30       | 19.1479  | 18.5433  | 23.3254  | 19.1112  |
| 30       | 30       | 30       | 30       | 30       | 18.7823  | 25.0296  |
| 30       | 30       | 30       | 30       | 30       | 30       | 16.9981  |
| 30       | 18.4748  | 30       | 19.3208  | 17.7399  | 18.4113  | 16.4592  |
| 30       | 30       | 23.9876  | 30       | 30       | 19.3793  | 18.5708  |
| 30       | 30       | 30       | 30       | 30       | 18.5793  | 18.2748  |
| 30       | 30       | 18.6742  | 30       | 30       | 30       | 30       |
| 30       | 30       | 30       | 30       | 30       | 18.6317  | 26.6875  |
| 30       | 30       | 30       | 30       | 30       | 17.6683  | 30       |
| 30       | 30       | 30       | 17.3834  | 16.6442  | 18.434   | 16.3957  |
| 30       | 30       | 30       | 30       | 30       | 19.4228  | 17.655   |
| 30       | 30       | 30       | 20.2191  | 30       | 18.2252  | 18.6844  |
| 30       | 17.9271  | 30       | 30       | 30       | 18.4082  | 17.7549  |
| 30       | 30       | 25.734   | 19.5605  | 21.377   | 22.7396  | 18.4783  |
| 14.4852  | 30       | 30       | 30       | 19.0666  | 18.8054  | 30       |
| 30       | 30       | 30       | 30       | 30       | 17.7791  | 23.0492  |
| 30       | 30       | 30       | 20.6735  | 30       | 18.0676  | 18.2944  |
| 30       | 27.4871  | 30       | 17.3244  | 30       | 16.5347  | 17.0679  |
| 14.287   | 30       | 30       | 16.9257  | 17.9019  | 19.7387  | 30       |
| 30       | 30       | 30       | 30       | 30       | 30       | 17.4971  |
| 30       | 18.6485  | 30       | 18.9831  | 30       | 19.0124  | 30       |
| 30       | 30       | 30       | 17.9963  | 18.9488  | 16.2687  | 16.6635  |
| 30       | 30       | 30       | 30       | 30       | 30       | 20.0228  |
| 30       | 30       | 30       | 17.8702  | 17.2957  | 16.1567  | 16.7209  |
| 30       | 30       | 30       | 30       | 30       | 18.1745  | 17.8797  |
| 19.3046  | 30       | 30       | 30       | 30       | 18.1553  | 20.4149  |



|         |         |         |         |         |         |         |
|---------|---------|---------|---------|---------|---------|---------|
| 30      | 30      | 30      | 18.8355 | 30      | 18.5784 | 17.8513 |
| 30      | 30      | 30      | 30      | 30      | 19.3734 | 16.8587 |
| 30      | 30      | 23.6898 | 30      | 30      | 18.4046 | 16.223  |
| 30      | 18.3719 | 30      | 30      | 30      | 21.9854 | 30      |
| 30      | 30      | 30      | 18.8996 | 30      | 23.1648 | 30      |
| 30      | 30      | 25.1204 | 30      | 30      | 17.9722 | 17.6901 |
| 30      | 30      | 30      | 17.774  | 18.0515 | 19.3195 | 17.279  |
| 30      | 30      | 30      | 30      | 30      | 17.6383 | 16.8643 |
| 18.5753 | 30      | 30      | 30      | 30      | 18.5353 | 16.9602 |
| 30      | 30      | 30      | 19.1295 | 16.8461 | 16.8753 | 19.6598 |
| 30      | 30      | 30      | 30      | 30      | 30      | 16.9387 |
| 30      | 30      | 30      | 30      | 30      | 20.5439 | 21.094  |
| 30      | 30      | 30      | 16.9554 | 18.1612 | 16.248  | 15.9509 |
| 30      | 18.4273 | 30      | 30      | 30      | 30      | 25.5322 |
| 30      | 30      | 30      | 16.3658 | 17.2041 | 16.9885 | 18.4659 |
| 30      | 26.8883 | 30      | 17.3728 | 19.1447 | 17.0497 | 15.9629 |
| 30      | 30      | 30      | 17.9697 | 23.0166 | 17.494  | 16.0373 |
| 30      | 30      | 30      | 19.1092 | 19.3151 | 18.6669 | 20.1322 |
| 30      | 30      | 25.588  | 17.2579 | 16.5017 | 30      | 24.9637 |
| 30      | 30      | 30      | 30      | 19.9109 | 18.2012 | 18.3302 |
| 30      | 30      | 30      | 17.7845 | 16.9191 | 17.782  | 20.7914 |
| 18.9614 | 13.0932 | 30      | 30      | 30      | 18.155  | 18.6922 |

| Efnb1_A28 | Efnb1_A40 | Epas1_A52 | Epas1_A64 | Ephb2_A76 | Ephb2_A88 | Ereg_A05 |
|-----------|-----------|-----------|-----------|-----------|-----------|----------|
| 17.6504   | 16.7038   | 19.1497   | 30        | 14.6651   | 16.344    | 30       |
| 15.802    | 16.985    | 17.8718   | 16.6791   | 14.7346   | 15.9078   | 30       |
| 15.2366   | 16.9897   | 15.8971   | 16.8224   | 12.9607   | 14.3284   | 30       |
| 14.0567   | 14.7413   | 16.2583   | 17.0975   | 13.4677   | 14.3244   | 30       |
| 15.0306   | 17.5679   | 17.1924   | 16.3451   | 13.3003   | 15.5492   | 30       |
| 14.2068   | 14.6205   | 17.9921   | 16.8675   | 13.825    | 14.6837   | 30       |
| 17.4473   | 18.0739   | 30        | 30        | 13.6838   | 14.8312   | 30       |
| 16.1121   | 17.7605   | 18.8384   | 30        | 16.8716   | 16.7381   | 30       |
| 17.1098   | 30        | 17.3218   | 17.5838   | 14.4021   | 15.1865   | 30       |
| 16.8997   | 17.7624   | 19.1766   | 15.499    | 14.9166   | 16.0573   | 30       |
| 13.8219   | 15.4364   | 15.3563   | 15.305    | 12.9712   | 14.2974   | 30       |
| 14.4631   | 15.6887   | 16.1108   | 16.6616   | 13.8514   | 16.2564   | 30       |
| 15.2867   | 17.1708   | 16.3342   | 16.2866   | 14.7757   | 16.1729   | 30       |
| 18.2967   | 18.8176   | 17.3203   | 16.1687   | 15.6989   | 16.9506   | 30       |
| 13.487    | 14.3324   | 14.9037   | 14.5506   | 12.7501   | 14.0463   | 30       |
| 16.345    | 30        | 30        | 30        | 14.9108   | 16.7214   | 30       |
| 15.4419   | 18.4311   | 30        | 30        | 14.5772   | 16.9734   | 30       |
| 13.4893   | 15.1699   | 15.9866   | 16.3144   | 12.856    | 14.7406   | 30       |
| 15.2436   | 15.6376   | 17.8462   | 19.281    | 13.1363   | 15.8422   | 30       |
| 14.4517   | 16.745    | 15.871    | 15.5411   | 13.5698   | 15.2287   | 30       |
| 16.5269   | 30        | 21.0869   | 30        | 16.2344   | 18.4304   | 30       |
| 14.5845   | 18.0878   | 19.1877   | 17.8045   | 13.9814   | 16.4026   | 30       |
| 15.2525   | 17.3847   | 30        | 30        | 14.6395   | 17.0242   | 30       |
| 30        | 19.4691   | 30        | 18.8692   | 12.7238   | 15.2407   | 30       |
| 18.9648   | 18.3938   | 18.7577   | 19.0059   | 15.707    | 16.3689   | 30       |
| 14.0082   | 15.6717   | 19.2489   | 30        | 12.284    | 17.79     | 30       |
| 16.7526   | 16.4645   | 30        | 30        | 13.6723   | 16.9272   | 30       |
| 18.4866   | 22.4851   | 18.6034   | 21.4277   | 14.374    | 16.6089   | 30       |
| 30        | 16.8273   | 30        | 30        | 12.4972   | 16.5291   | 30       |
| 15.8086   | 16.6039   | 19.0153   | 18.1889   | 13.3506   | 15.886    | 30       |
| 15.0201   | 15.0228   | 17.7342   | 19.0712   | 13.9659   | 14.7742   | 30       |
| 15.9668   | 16.7894   | 30        | 30        | 14.0143   | 15.6854   | 30       |
| 30        | 30        | 30        | 30        | 15.3621   | 16.5969   | 30       |
| 15.9621   | 17.8027   | 18.5737   | 18.6529   | 15.6495   | 15.9817   | 30       |
| 14.4522   | 15.3879   | 18.8444   | 16.679    | 14.5037   | 15.3867   | 30       |
| 13.9162   | 15.311    | 19.1868   | 23.9685   | 14.1119   | 15.6362   | 30       |
| 15.0065   | 16.3762   | 17.0903   | 16.2336   | 14.3407   | 15.8621   | 30       |
| 13.6173   | 16.2931   | 15.3966   | 14.3215   | 12.259    | 14.3185   | 30       |
| 14.7109   | 16.0612   | 14.7819   | 15.2137   | 14.1347   | 15.4159   | 25.7265  |
| 16.922    | 17.2569   | 17.8221   | 16.2094   | 15.0944   | 15.5181   | 30       |

|         |         |         |         |         |         |         |
|---------|---------|---------|---------|---------|---------|---------|
| 14.7664 | 18.4795 | 17.1176 | 16.8942 | 15.3827 | 17.3454 | 30      |
| 13.5809 | 14.853  | 15.6575 | 15.1877 | 13.0943 | 14.6376 | 30      |
| 15.2522 | 17.5451 | 30      | 30      | 15.555  | 16.7881 | 30      |
| 23.7884 | 18.3109 | 17.255  | 16.4435 | 14.5991 | 19.1771 | 30      |
| 13.984  | 15.5394 | 14.1535 | 13.7788 | 14.9513 | 17.3887 | 30      |
| 16.3875 | 15.7463 | 15.5756 | 16.2765 | 15.2294 | 17.231  | 30      |
| 14.2879 | 15.6278 | 15.8026 | 16.0433 | 14.4895 | 16.1355 | 30      |
| 15.9139 | 16.7084 | 30      | 19.0782 | 15.3863 | 16.0545 | 30      |
| 14.4024 | 15.4041 | 17.58   | 18.8794 | 15.5923 | 16.9462 | 18.2637 |
| 14.0042 | 14.8815 | 17.0571 | 18.695  | 14.3071 | 16.7378 | 30      |
| 16.1398 | 17.3062 | 17.4924 | 17.183  | 15.0335 | 15.449  | 30      |
| 13.9252 | 15.9646 | 30      | 30      | 13.3536 | 14.9938 | 30      |
| 15.8464 | 15.5057 | 30      | 18.8693 | 13.097  | 14.5458 | 30      |
| 15.0028 | 16.0017 | 17.5763 | 20.1851 | 14.623  | 16.5554 | 30      |
| 30      | 30      | 19.2313 | 30      | 17.0281 | 20.6642 | 30      |
| 15.9912 | 15.6639 | 17.7954 | 30      | 13.2996 | 14.9038 | 17.3563 |
| 30      | 16.3006 | 16.3756 | 16.0713 | 13.2157 | 15.4303 | 30      |
| 13.7977 | 15.0257 | 15.4361 | 15.5119 | 14.3802 | 15.8633 | 30      |
| 15.2473 | 15.2138 | 16.4732 | 16.8779 | 16.6656 | 17.8907 | 30      |
| 30      | 16.8178 | 19.8486 | 17.9013 | 15.5441 | 16.8841 | 30      |
| 18.1231 | 18.2607 | 19.0422 | 17.5438 | 16.4338 | 15.9562 | 30      |
| 16.9175 | 16.2299 | 16.8244 | 30      | 30      | 15.7209 | 16.1574 |

| Ereg_A17 | Fut2_A29 | Fut2_A41 | Gapdh_A53 | Gapdh_A65 | Gsk3b_A77 | Gsk3b_A89 |
|----------|----------|----------|-----------|-----------|-----------|-----------|
| 30       | 30       | 23.4668  | 10.7966   | 10.7294   | 14.8823   | 14.8382   |
| 30       | 30       | 23.1334  | 10.6289   | 10.5799   | 14.6883   | 14.8718   |
| 30       | 30       | 30       | 9.73646   | 9.62594   | 14.5719   | 15.4158   |
| 30       | 15.6394  | 14.5391  | 8.45393   | 8.42886   | 13.3292   | 13.2978   |
| 30       | 30       | 17.4964  | 10.229    | 10.2455   | 13.941    | 14.0712   |
| 30       | 16.7163  | 15.3258  | 9.65897   | 9.80081   | 14.6669   | 15.4578   |
| 30       | 30       | 17.2821  | 9.55516   | 9.57825   | 14.7886   | 14.67     |
| 30       | 13.2832  | 13.9177  | 11.8583   | 11.8981   | 16.2177   | 16.2725   |
| 30       | 30       | 23.1573  | 10.5377   | 10.5174   | 15.4315   | 15.6401   |
| 30       | 30       | 19.8207  | 10.4501   | 10.3495   | 15.3227   | 15.3251   |
| 30       | 30       | 21.9478  | 8.55945   | 8.5024    | 12.9846   | 12.9642   |
| 30       | 30       | 17.8009  | 9.09327   | 8.99269   | 14.6919   | 13.9696   |
| 30       | 16.9831  | 16.2876  | 10.5123   | 10.6273   | 14.4015   | 14.3983   |
| 30       | 30       | 24.592   | 10.3965   | 10.5302   | 14.3207   | 14.994    |
| 30       | 14.0937  | 14.7251  | 7.92122   | 7.88638   | 12.821    | 13.2431   |
| 30       | 30       | 16.7318  | 11.9888   | 11.9599   | 30        | 18.9125   |
| 30       | 30       | 25.1404  | 10.6715   | 10.9142   | 15.4592   | 15.6424   |
| 30       | 30       | 30       | 8.85131   | 8.96016   | 14.0979   | 13.4004   |
| 30       | 30       | 17.8506  | 9.92162   | 10.8149   | 14.2679   | 14.3823   |
| 30       | 30       | 16.4127  | 9.37199   | 9.65371   | 14.2743   | 14.3704   |
| 30       | 30       | 30       | 11.354    | 11.5514   | 16.0434   | 16.4237   |
| 30       | 30       | 30       | 10.594    | 10.6657   | 14.789    | 14.6768   |
| 30       | 14.8028  | 14.7029  | 12.5736   | 12.754    | 17.411    | 23.114    |
| 30       | 15.8089  | 15.5492  | 12.1012   | 12.291    | 14.4653   | 14.6593   |
| 30       | 30       | 24.3692  | 11.0973   | 11.1895   | 14.7324   | 15.1512   |
| 30       | 30       | 30       | 11.277    | 11.3246   | 17.3033   | 15.4155   |
| 30       | 30       | 17.6531  | 11.6632   | 11.7187   | 15.9807   | 15.3734   |
| 30       | 30       | 30       | 12.0208   | 11.9809   | 18.745    | 18.5838   |
| 30       | 14.7408  | 14.5871  | 12.7529   | 12.7635   | 16.2408   | 16.3262   |
| 30       | 30       | 21.5367  | 10.6216   | 10.8323   | 14.6652   | 14.9816   |
| 30       | 30       | 18.0453  | 10.3216   | 10.5001   | 14.7746   | 14.9521   |
| 30       | 30       | 16.9122  | 10.3489   | 10.3033   | 14.6305   | 13.7113   |
| 30       | 30       | 19.0987  | 12.8591   | 12.7851   | 15.9731   | 14.9814   |
| 30       | 30       | 30       | 11.6105   | 11.6033   | 16.5294   | 15.4601   |
| 30       | 30       | 24.0922  | 10.7056   | 10.6405   | 15.4577   | 14.8999   |
| 30       | 30       | 17.9528  | 9.60374   | 9.59597   | 14.1485   | 14.0828   |
| 30       | 30       | 17.7024  | 10.4312   | 10.4075   | 14.8071   | 14.1669   |
| 17.9453  | 30       | 16.7557  | 8.74169   | 8.67451   | 13.482    | 13.3274   |
| 30       | 30       | 17.5116  | 9.57876   | 9.50717   | 14.4031   | 14.968    |
| 30       | 30       | 18.181   | 10.9896   | 11.004    | 15.2293   | 15.5043   |

|         |         |         |         |         |         |         |
|---------|---------|---------|---------|---------|---------|---------|
| 30      | 30      | 22.1569 | 10.0421 | 9.92938 | 16.5855 | 15.7496 |
| 30      | 30      | 19.5998 | 8.69547 | 8.60645 | 13.6771 | 13.4578 |
| 30      | 30      | 17.4899 | 10.5823 | 10.4893 | 14.5114 | 14.5099 |
| 30      | 30      | 26.4049 | 11.0841 | 10.9813 | 16.7855 | 17.7324 |
| 30      | 30      | 17.8164 | 9.74694 | 9.72459 | 14.1625 | 14.2829 |
| 30      | 30      | 30      | 10.7899 | 10.6722 | 14.4809 | 14.1613 |
| 30      | 30      | 18.3404 | 9.72826 | 9.61955 | 13.9045 | 13.7957 |
| 30      | 30      | 17.6697 | 11.4899 | 11.7907 | 16.4117 | 15.3661 |
| 19.6822 | 30      | 16.8684 | 10.2797 | 10.4435 | 15.19   | 15.3997 |
| 30      | 30      | 16.9158 | 10.0167 | 10.1598 | 15.0542 | 14.3913 |
| 30      | 30      | 20.15   | 10.5747 | 10.8496 | 14.7332 | 14.7866 |
| 30      | 30      | 16.9587 | 10.0127 | 10.0673 | 13.9993 | 13.4022 |
| 30      | 14.0646 | 14.3677 | 10.239  | 10.3327 | 14.4463 | 14.3165 |
| 30      | 30      | 21.2898 | 10.7972 | 10.9548 | 15.6604 | 14.5649 |
| 30      | 30      | 30      | 11.7479 | 12.1265 | 16.2492 | 15.8084 |
| 22.3603 | 30      | 16.6895 | 10.104  | 10.2367 | 14.5333 | 13.6986 |
| 30      | 30      | 17.0963 | 9.56547 | 9.60876 | 15.514  | 14.1602 |
| 30      | 30      | 18.4954 | 9.04943 | 9.08884 | 14.6182 | 14.8052 |
| 18.1945 | 30      | 16.7285 | 10.1695 | 10.1226 | 15.5552 | 15.9456 |
| 30      | 30      | 17.1611 | 11.93   | 11.9175 | 16.3328 | 15.7331 |
| 30      | 30      | 18.5614 | 11.3708 | 11.42   | 16.6239 | 17.1006 |
| 30      | 30      | 30      | 18.4022 | 10.7211 | 10.716  | 14.314  |

| Gusb_A06 | Gusb_A18 | H6pd_A30 | H6pd_A42 | Hes1_A54 | Hes1_A66 | Hes5_A78 |
|----------|----------|----------|----------|----------|----------|----------|
| 25.0679  | 17.2456  | 30       | 30       | 17.6868  | 15.8154  | 30       |
| 15.787   | 15.4322  | 17.4363  | 16.6602  | 16.1614  | 13.344   | 21.6189  |
| 16.8696  | 16.2712  | 16.4362  | 16.2362  | 14.9986  | 13.8389  | 20.8825  |
| 15.2286  | 14.5314  | 18.1822  | 19.3087  | 14.5971  | 12.2269  | 20.8569  |
| 17.9317  | 15.9863  | 18.0123  | 17.0645  | 14.9418  | 13.1816  | 23.3755  |
| 16.5127  | 15.2748  | 17.0191  | 16.1098  | 16.3689  | 14.7904  | 24.9753  |
| 18.4663  | 15.6713  | 30       | 20.1782  | 14.2012  | 12.1673  | 30       |
| 19.0475  | 15.897   | 30       | 30       | 30       | 30       | 30       |
| 16.5924  | 15.3065  | 18.1152  | 18.7228  | 15.0149  | 13.7738  | 20.108   |
| 17.6766  | 15.6489  | 20.2959  | 19.4065  | 16.4114  | 15.2185  | 21.0571  |
| 14.9461  | 13.5563  | 18.574   | 16.5962  | 16.1626  | 13.7386  | 23.8947  |
| 18.978   | 16.7342  | 20.2329  | 17.6478  | 15.9952  | 14.3987  | 30       |
| 18.1949  | 16.7665  | 30       | 19.9431  | 16.4935  | 14.4229  | 30       |
| 18.7802  | 17.1242  | 23.516   | 18.924   | 17.8028  | 16.887   | 21.9776  |
| 15.22    | 14.3315  | 18.6906  | 16.562   | 13.9561  | 12.2481  | 23.0668  |
| 30       | 16.0151  | 30       | 25.5671  | 15.4614  | 15.1259  | 30       |
| 15.3988  | 15.6944  | 30       | 22.8619  | 15.9092  | 14.5751  | 30       |
| 15.1995  | 14.1227  | 17.135   | 16.7719  | 13.5589  | 11.9582  | 30       |
| 16.531   | 14.734   | 17.9819  | 16.5798  | 15.365   | 14.1713  | 30       |
| 15.2785  | 13.656   | 17.0993  | 19.0791  | 15.1718  | 13.8459  | 25.3099  |
| 18.8975  | 16.5989  | 19.2261  | 18.442   | 16.9574  | 14.6871  | 30       |
| 16.3328  | 17.9212  | 30       | 19.1756  | 18.1398  | 15.8045  | 30       |
| 30       | 16.5875  | 30       | 30       | 19.6769  | 17.8545  | 30       |
| 30       | 17.6432  | 30       | 17.8134  | 30       | 30       | 30       |
| 17.3776  | 18.0662  | 19.4198  | 18.7478  | 17.7009  | 15.2451  | 30       |
| 16.6572  | 15.777   | 19.3414  | 20.3026  | 19.972   | 16.6753  | 30       |
| 19.1768  | 18.9142  | 18.2275  | 17.1026  | 17.286   | 16.0262  | 21.7722  |
| 18.6499  | 18.3013  | 20.3384  | 22.9563  | 22.4303  | 20.8963  | 30       |
| 30       | 21.2585  | 30       | 17.6485  | 30       | 30       | 20.2305  |
| 16.3216  | 15.5001  | 19.8173  | 18.1125  | 18.0137  | 15.5328  | 30       |
| 15.8917  | 14.7024  | 16.3097  | 18.364   | 16.1083  | 13.8112  | 30       |
| 19.3618  | 16.0517  | 18.6165  | 19.3708  | 20.7911  | 16.0966  | 21.1848  |
| 18.1085  | 16.2395  | 30       | 30       | 30       | 27.7883  | 30       |
| 16.5971  | 16.6072  | 30       | 24.2713  | 16.7753  | 13.6467  | 30       |
| 16.348   | 18.21    | 22.0799  | 20.5345  | 16.0873  | 14.4144  | 30       |
| 15.2722  | 14.3407  | 19.2592  | 19.3611  | 14.6968  | 12.4834  | 21.6962  |
| 18.0606  | 15.247   | 19.4492  | 18.1236  | 14.8408  | 13.7847  | 25.142   |
| 14.8142  | 13.583   | 20.4809  | 18.1147  | 14.5674  | 12.364   | 21.8029  |
| 17.1234  | 15.8913  | 30       | 30       | 17.4498  | 14.6165  | 21.7714  |
| 16.6503  | 15.7865  | 20.6954  | 17.7979  | 16.7738  | 14.1319  | 30       |

|         |         |         |         |         |         |         |
|---------|---------|---------|---------|---------|---------|---------|
| 17.2084 | 15.2048 | 17.4883 | 19.0619 | 18.0304 | 15.2477 | 30      |
| 15.3926 | 14.7242 | 19.1334 | 18.7503 | 15.6745 | 13.3754 | 30      |
| 30      | 19.1747 | 22.9906 | 19.2008 | 17.5771 | 13.9422 | 21.4523 |
| 16.8302 | 15.2169 | 30      | 22.3405 | 15.8514 | 13.6348 | 30      |
| 18.5706 | 16.3356 | 30      | 21.5092 | 15.4704 | 13.1431 | 30      |
| 30      | 16.368  | 30      | 20.352  | 16.2583 | 13.8056 | 30      |
| 16.2991 | 15.8783 | 19.8554 | 17.2967 | 15.5362 | 12.388  | 30      |
| 30      | 18.2476 | 30      | 22.0067 | 15.9057 | 14.4037 | 30      |
| 18.9415 | 15.7911 | 18.9397 | 17.6015 | 19.9145 | 17.1928 | 30      |
| 16.0546 | 15.0136 | 17.7026 | 17.1461 | 19.541  | 18.1249 | 25.7275 |
| 15.8588 | 15.5133 | 19.0801 | 16.2274 | 18.5312 | 20.7566 | 20.529  |
| 19.2885 | 16.7563 | 30      | 30      | 14.1171 | 12.6263 | 20.6846 |
| 15.7588 | 14.9938 | 18.2328 | 17.4004 | 17.0676 | 14.6486 | 20.8575 |
| 19.3383 | 17.0567 | 30      | 22.0402 | 15.8008 | 14.8929 | 30      |
| 16.9605 | 18.4903 | 30      | 27.1115 | 22.995  | 18.7789 | 21.2244 |
| 16.6909 | 15.3299 | 30      | 19.2846 | 15.6282 | 13.7469 | 22.3705 |
| 15.5112 | 14.1102 | 20.3246 | 17.5997 | 15.0439 | 13.3055 | 21.9455 |
| 16.2112 | 15.6069 | 17.2368 | 17.0946 | 15.5717 | 13.6674 | 30      |
| 16.7667 | 15.9947 | 18.5985 | 19.2794 | 18.5515 | 18.3296 | 30      |
| 17.7917 | 16.7151 | 30      | 30      | 17.0711 | 15.1141 | 21.5477 |
| 16.587  | 15.8343 | 19.578  | 23.4462 | 17.9626 | 16.1263 | 23.0032 |
| 14.5776 | 18.3039 | 16.3976 | 19.2493 | 17.9758 | 24.0879 | 18.0503 |

| Hes5_A90 | Hif1a_A07 | Hif1a_A19 | Hopx_A31 | Hopx_A43 | Jag1_A55 | Jag1_A67 |
|----------|-----------|-----------|----------|----------|----------|----------|
| 24.6564  | 15.2546   | 15.2637   | 14.3388  | 14.48    | 20.9812  | 30       |
| 30       | 16.4392   | 15.2419   | 13.1272  | 13.1459  | 21.4932  | 19.9327  |
| 24.8578  | 15.1553   | 15.4637   | 13.8953  | 13.7595  | 23.6371  | 30       |
| 22.3207  | 14.2012   | 14.2298   | 10.9239  | 10.863   | 18.1526  | 17.0375  |
| 22.0657  | 14.3545   | 13.9528   | 12.9834  | 12.9393  | 18.8726  | 16.0295  |
| 27.7018  | 18.8912   | 16.6677   | 12.1962  | 12.1197  | 18.2958  | 15.5086  |
| 30       | 15.4311   | 13.4205   | 13.2566  | 13.192   | 24.4154  | 30       |
| 30       | 15.2725   | 17.5748   | 14.2962  | 13.9506  | 23.3689  | 30       |
| 30       | 16.4483   | 15.1751   | 13.6612  | 13.592   | 18.3698  | 17.3991  |
| 23.009   | 15.6946   | 16.868    | 13.2251  | 13.0334  | 21.8791  | 30       |
| 30       | 15.1365   | 14.0388   | 12.4949  | 12.4477  | 21.0752  | 17.8908  |
| 23.9815  | 16.6187   | 14.4463   | 12.4522  | 12.4422  | 18.127   | 15.9875  |
| 30       | 15.2739   | 15.0993   | 13.389   | 13.2177  | 17.5757  | 16.8088  |
| 23.73    | 14.9834   | 15.0116   | 14.1068  | 13.4287  | 24.3973  | 30       |
| 22.8759  | 13.9687   | 13.3498   | 11.3024  | 10.9603  | 15.4969  | 15.1244  |
| 30       | 17.4552   | 17.5714   | 15.0401  | 14.8511  | 21.4474  | 30       |
| 30       | 18.378    | 16.5198   | 13.7704  | 13.5443  | 23.3846  | 30       |
| 30       | 13.7442   | 14.1215   | 12.3295  | 12.3441  | 16.5135  | 15.5733  |
| 30       | 17.2091   | 15.6471   | 12.3008  | 12.6827  | 17.4522  | 19.2422  |
| 21.537   | 14.9352   | 13.8426   | 12.8994  | 12.8814  | 21.2421  | 17.168   |
| 30       | 16.4575   | 15.1596   | 13.402   | 13.4662  | 21.4189  | 18.4639  |
| 30       | 16.2914   | 15.6355   | 13.6182  | 13.735   | 21.1202  | 30       |
| 30       | 18.1811   | 13.8872   | 13.4927  | 13.5382  | 19.0043  | 30       |
| 30       | 14.9325   | 14.8821   | 12.2802  | 12.1903  | 18.9635  | 30       |
| 30       | 16.3341   | 16.4423   | 13.8731  | 14.5143  | 18.7853  | 16.624   |
| 30       | 16.4025   | 14.9172   | 13.6141  | 13.499   | 18.7476  | 21.3768  |
| 22.4818  | 16.0419   | 15.5023   | 13.6149  | 13.6066  | 19.8118  | 30       |
| 30       | 22.2334   | 25.2373   | 15.22    | 15.2515  | 22.9104  | 30       |
| 30       | 15.5314   | 15.3658   | 14.0491  | 14.0582  | 21.1309  | 30       |
| 30       | 16.5394   | 16.574    | 13.9801  | 14.0215  | 18.5313  | 16.7684  |
| 26.1602  | 17.0347   | 20.1316   | 12.5357  | 12.5102  | 23.4398  | 21.0088  |
| 23.0256  | 30        | 17.8836   | 14.0247  | 13.9852  | 19.8531  | 30       |
| 22.005   | 16.3487   | 19.0186   | 12.6776  | 12.5948  | 22.3145  | 30       |
| 23.9868  | 16.7415   | 17.0733   | 13.3356  | 13.3318  | 20.2987  | 18.6421  |
| 30       | 16.4285   | 17.7302   | 13.9909  | 13.898   | 19.6379  | 17.3401  |
| 25.8123  | 14.3053   | 14.0789   | 13.4331  | 13.4407  | 20.5548  | 16.7129  |
| 30       | 14.1283   | 13.0911   | 12.828   | 12.9163  | 17.7307  | 16.5757  |
| 25.5885  | 13.2072   | 12.9604   | 11.9304  | 11.9018  | 19.2371  | 16.4085  |
| 30       | 14.6522   | 13.807    | 14.5853  | 14.5253  | 17.6741  | 16.9026  |
| 30       | 16.035    | 15.1839   | 13.718   | 13.7233  | 24.1051  | 30       |



|         |         |         |         |         |         |         |
|---------|---------|---------|---------|---------|---------|---------|
| 26.1425 | 24.8696 | 17.1491 | 13.6291 | 13.4919 | 21.0018 | 30      |
| 30      | 15.4973 | 14.6862 | 13.417  | 12.8379 | 19.2075 | 16.9389 |
| 22.4301 | 15.994  | 15.0363 | 15.1062 | 14.9579 | 18.9375 | 17.3248 |
| 30      | 16.6796 | 16.2579 | 15.4238 | 15.5047 | 17.0256 | 16.1098 |
| 30      | 15.6661 | 16.8364 | 16.3652 | 16.1447 | 19.5524 | 30      |
| 30      | 17.0456 | 18.0004 | 12.9904 | 13.0337 | 27.2456 | 30      |
| 30      | 14.6619 | 13.8212 | 13.3066 | 13.3556 | 16.2612 | 15.1484 |
| 30      | 15.145  | 14.7692 | 14.3336 | 14.4797 | 23.6857 | 30      |
| 30      | 17.5418 | 16.579  | 13.8906 | 14.0495 | 18.9828 | 17.6575 |
| 27.9534 | 15.1306 | 14.9188 | 13.978  | 14.0434 | 22.9467 | 18.5945 |
| 21.5382 | 16.1866 | 16.4409 | 14.2016 | 14.3371 | 19.4698 | 18.4358 |
| 22.0019 | 15.9689 | 15.5435 | 12.517  | 12.5553 | 17.5685 | 16.8146 |
| 21.8635 | 14.4893 | 14.5267 | 12.0041 | 12.0973 | 19.2767 | 18.275  |
| 30      | 15.1514 | 14.3398 | 14.2931 | 14.3257 | 24.9148 | 18.5594 |
| 30      | 19.3454 | 30      | 13.5068 | 13.5773 | 18.6254 | 30      |
| 20.6114 | 16.7567 | 15.7123 | 12.6613 | 12.7389 | 17.3669 | 16.3335 |
| 23.1201 | 15.2797 | 14.5085 | 12.866  | 12.9259 | 18.6302 | 16.1769 |
| 30      | 12.8494 | 12.1793 | 16.0526 | 16.025  | 16.8896 | 16.159  |
| 24.8451 | 18.1503 | 17.0787 | 14.9817 | 15.1813 | 19.3983 | 21.7832 |
| 21.2403 | 16.878  | 17.795  | 14.9174 | 14.9484 | 17.7432 | 17.0393 |
| 23.0786 | 16.2411 | 15.6176 | 14.1557 | 14.1659 | 18.4757 | 17.1913 |
| 30      | 30      | 15.5082 | 14.9413 | 13.4032 | 13.2675 | 21.5141 |

| Lgr5_A79 | Lgr5_A91 | Lrig1_A08 | Lrig1_A20 | Lyz2_A32 | Lyz2_A44 | Msi1_A56 |
|----------|----------|-----------|-----------|----------|----------|----------|
| 16.766   | 30       | 14.2415   | 14.7081   | 24.1368  | 19.2341  | 15.9665  |
| 12.7177  | 14.5623  | 14.1932   | 14.6686   | 23.9148  | 17.9841  | 14.1092  |
| 14.9338  | 16.4227  | 15.2414   | 14.363    | 26.835   | 30       | 16.1024  |
| 14.8797  | 16.3901  | 13.7187   | 13.795    | 24.6268  | 18.2427  | 15.0815  |
| 11.587   | 12.6699  | 12.8729   | 12.9409   | 22.229   | 20.6319  | 13.1377  |
| 17.308   | 30       | 13.9017   | 13.6688   | 23.8235  | 18.1992  | 17.0098  |
| 13.3299  | 14.3813  | 13.6937   | 13.2294   | 24.4264  | 30       | 13.5989  |
| 30       | 17.9195  | 30        | 30        | 21.8235  | 18.7697  | 30       |
| 17.0735  | 17.6497  | 15.3241   | 15.7836   | 22.6509  | 18.6458  | 14.9713  |
| 15.7024  | 16.0838  | 14.4983   | 14.8445   | 22.6623  | 18.7061  | 15.0391  |
| 13.9402  | 16.2306  | 12.9596   | 13.3061   | 21.7354  | 17.7515  | 13.0872  |
| 15.4681  | 18.0236  | 13.4422   | 13.874    | 23.0867  | 17.2296  | 14.9772  |
| 30       | 30       | 15.8121   | 15.4563   | 21.5602  | 30       | 16.5343  |
| 14.5648  | 30       | 15.2979   | 15.321    | 23.3518  | 18.3497  | 14.8634  |
| 15.0075  | 16.9592  | 13.8747   | 12.7011   | 22.6624  | 23.1426  | 14.2648  |
| 14.3645  | 15.4497  | 14.8516   | 16.6564   | 21.7879  | 18.5669  | 16.1875  |
| 15.553   | 18.4725  | 14.5615   | 15.0398   | 21.5893  | 18.5626  | 14.4147  |
| 16.9011  | 18.6058  | 13.4153   | 12.7736   | 20.9891  | 16.8785  | 13.4655  |
| 24.0653  | 19.1926  | 14.0066   | 13.8005   | 22.2909  | 18.7304  | 16.5875  |
| 16.244   | 19.386   | 14.1696   | 13.5087   | 22.1606  | 18.0668  | 16.0537  |
| 14.1899  | 15.5926  | 15.9882   | 16.15     | 20.1415  | 30       | 13.9778  |
| 13.417   | 15.5828  | 14.3788   | 14.9941   | 19.8659  | 18.7022  | 13.9605  |
| 14.7878  | 16.3901  | 30        | 18.2114   | 22.845   | 18.2324  | 15.6982  |
| 30       | 30       | 16.0396   | 17.3438   | 23.6868  | 18.6194  | 14.7049  |
| 14.1632  | 15.7311  | 14.3888   | 14.67     | 23.003   | 30       | 17.6086  |
| 14.2626  | 16.2308  | 13.8596   | 13.9509   | 22.7841  | 30       | 16.3842  |
| 12.3565  | 14.8646  | 14.411    | 14.7132   | 21.2918  | 20.3751  | 15.6845  |
| 17.3593  | 17.468   | 24.148    | 19.2908   | 25.3493  | 21.0471  | 15.3226  |
| 30       | 30       | 17.7886   | 17.62     | 25.3493  | 19.2726  | 16.1916  |
| 11.9997  | 13.5734  | 13.7444   | 14.5583   | 24.4302  | 30       | 16.2115  |
| 14.0398  | 16.0114  | 17.3801   | 14.8304   | 26.6148  | 22.9506  | 13.4609  |
| 13.6024  | 15.0606  | 14.4671   | 14.1671   | 24.0182  | 16.8334  | 15.2154  |
| 17.2803  | 18.0724  | 18.7808   | 17.5651   | 21.4545  | 24.5983  | 13.8473  |
| 13.9196  | 16.6143  | 15.5812   | 15.4784   | 23.9645  | 21.3995  | 13.954   |
| 16.0915  | 30       | 14.1309   | 13.817    | 23.6784  | 17.5743  | 14.5175  |
| 17.3825  | 17.4333  | 14.5716   | 15.7951   | 19.5573  | 18.8837  | 18.0956  |
| 12.3351  | 13.86    | 14.4229   | 14.0458   | 22.6079  | 18.0043  | 13.5998  |
| 16.7264  | 18.0783  | 13.7608   | 13.0012   | 22.206   | 19.0268  | 14.4297  |
| 30       | 20.2448  | 14.7336   | 14.3269   | 23.3975  | 17.1892  | 30       |
| 12.7697  | 14.0164  | 14.8481   | 15.8349   | 22.2048  | 17.4992  | 14.1299  |

|         |         |         |         |         |         |         |
|---------|---------|---------|---------|---------|---------|---------|
| 16.6587 | 30      | 14.6494 | 13.5483 | 22.4359 | 19.4941 | 15.7514 |
| 26.3881 | 30      | 14.2532 | 14.9177 | 22.513  | 18.048  | 30      |
| 17.7488 | 30      | 16.607  | 14.7472 | 22.2485 | 21.1034 | 14.3    |
| 13.3655 | 14.7983 | 15.1625 | 15.0686 | 22.1788 | 18.2035 | 15.0656 |
| 30      | 30      | 14.9442 | 15.0003 | 21.0471 | 17.134  | 17.3061 |
| 15.0023 | 30      | 16.7328 | 16.3658 | 22.0803 | 19.2494 | 14.9075 |
| 15.1497 | 16.3287 | 14.3387 | 14.3018 | 23.6714 | 21.181  | 13.104  |
| 14.0373 | 16.0993 | 14.0826 | 14.0537 | 20.5528 | 17.6656 | 14.2794 |
| 25.5656 | 30      | 14.9025 | 14.8473 | 20.8089 | 17.7675 | 16.1099 |
| 30      | 30      | 15.0708 | 15.4389 | 20.5353 | 19.6989 | 17.6964 |
| 15.2073 | 16.3452 | 14.8109 | 14.6637 | 21.9351 | 21.515  | 14.4978 |
| 13.3494 | 16.1449 | 14.1708 | 13.9332 | 23.8899 | 18.2077 | 13.0292 |
| 13.5319 | 14.9973 | 13.2884 | 12.7736 | 19.8465 | 17.88   | 14.3865 |
| 12.9899 | 14.3236 | 15.4677 | 13.553  | 21.7463 | 19.6818 | 16.3705 |
| 15.6458 | 15.5067 | 15.9338 | 13.549  | 12.0957 | 11.1428 | 30      |
| 14.082  | 14.3812 | 12.615  | 12.8632 | 21.3206 | 17.1941 | 14.8872 |
| 18.051  | 16.3314 | 14.012  | 14.1955 | 22.7264 | 18.0211 | 14.6843 |
| 30      | 30      | 14.8608 | 14.4579 | 23.9399 | 19.6299 | 18.5461 |
| 24.8588 | 30      | 18.6276 | 18.7684 | 24.4988 | 17.1362 | 30      |
| 14.9644 | 16.7272 | 14.817  | 16.6311 | 22.0246 | 30      | 15.1703 |
| 16.8276 | 18.3634 | 14.908  | 14.8472 | 22.6596 | 18.2989 | 14.9085 |
| 18.4251 | 13.1633 | 14.0715 | 13.9132 | 12.8282 | 20.6378 | 18.9468 |

| <b>Msi1_A68</b> | <b>Msi2_A80</b> | <b>Msi2_A92</b> | <b>Myb_A09</b> | <b>Myb_A21</b> | <b>Myc_A33</b> | <b>Myc_A45</b> |
|-----------------|-----------------|-----------------|----------------|----------------|----------------|----------------|
| 16.9654         | 15.2299         | 17.0938         | 13.4962        | 14.3097        | 13.7186        | 13.7174        |
| 15.3778         | 13.9214         | 15.6749         | 13.5149        | 13.6484        | 12.2047        | 12.5283        |
| 17.6933         | 13.9407         | 14.6997         | 11.5605        | 11.9007        | 14.9786        | 15.2241        |
| 16.7668         | 13.2036         | 13.9757         | 11.3654        | 11.9327        | 11.2129        | 11.5867        |
| 14.8696         | 16.4914         | 17.7001         | 12.7922        | 13.5455        | 16.1621        | 15.159         |
| 26.9153         | 14.779          | 15.852          | 12.2768        | 12.3012        | 12.3289        | 12.8295        |
| 15.7192         | 14.2066         | 15.346          | 11.6771        | 11.6561        | 13.0822        | 13.2975        |
| 19.0441         | 16.0982         | 16.1714         | 14.8731        | 16.2368        | 30             | 19.1256        |
| 17.2569         | 15.6291         | 17.8633         | 13.2518        | 13.5734        | 14.0795        | 14.1085        |
| 14.7382         | 15.2738         | 17.4392         | 12.7942        | 12.8693        | 15.0307        | 15.7483        |
| 16.434          | 13.7609         | 14.7845         | 11.5232        | 11.8861        | 12.0067        | 12.5268        |
| 16.3741         | 15.2496         | 16.4279         | 11.5312        | 11.977         | 12.5358        | 12.944         |
| 30              | 13.2649         | 14.0737         | 12.5316        | 12.9853        | 12.4762        | 12.9371        |
| 17.9791         | 14.3453         | 16.8563         | 13.4085        | 13.8189        | 12.0906        | 12.2462        |
| 17.2234         | 13.2255         | 14.6266         | 10.7612        | 11.2764        | 11.8527        | 12.1414        |
| 18.9848         | 19.2762         | 16.9455         | 16.2136        | 15.9382        | 13.6834        | 14.8027        |
| 17.5422         | 15.9973         | 18.4884         | 14.4373        | 14.1598        | 15.0885        | 15.7637        |
| 14.9363         | 13.5147         | 15.2759         | 11.0333        | 11.184         | 11.8597        | 12.2992        |
| 19.5671         | 15.5501         | 17.0025         | 11.4329        | 11.714         | 12.558         | 12.8103        |
| 19.0557         | 14.4862         | 15.81           | 12.0372        | 12.439         | 12.7585        | 13.599         |
| 15.6487         | 16.6808         | 19.7574         | 15.1926        | 15.5433        | 13.9873        | 13.926         |
| 16.9499         | 16.164          | 17.1959         | 13.9953        | 13.4315        | 14.7619        | 14.1094        |
| 17.9067         | 16.1279         | 14.3273         | 15.059         | 15.6777        | 15.3827        | 30             |
| 16.9029         | 14.3074         | 14.8266         | 12.8096        | 13.4326        | 16.6224        | 30             |
| 19.4378         | 17.3118         | 17.253          | 15.2058        | 15.484         | 13.1907        | 14.1238        |
| 16.4319         | 15.3805         | 17.3186         | 14.6001        | 14.9281        | 14.0252        | 14.7503        |
| 16.7697         | 15.9181         | 17.4777         | 15.0763        | 16.3726        | 14.8007        | 14.9641        |
| 15.9259         | 18.6679         | 19.0914         | 16.3545        | 15.5217        | 18.7433        | 16.2395        |
| 17.4357         | 16.3079         | 16.4922         | 30             | 24.0127        | 16.3445        | 16.234         |
| 17.3513         | 16.2696         | 17.6366         | 12.8124        | 14.2057        | 15.1059        | 14.8288        |
| 16.0029         | 15.7478         | 16.569          | 12.9149        | 13.2555        | 14.6914        | 13.9165        |
| 17.4322         | 16.0448         | 17.7697         | 13.5094        | 13.893         | 14.1078        | 14.7469        |
| 17.0367         | 13.9057         | 15.3209         | 30             | 27.7777        | 16.6306        | 16.7776        |
| 15.9216         | 15.3195         | 17.0776         | 13.8712        | 14.0115        | 13.6001        | 13.331         |
| 17.2684         | 15.5957         | 17.0907         | 13.5594        | 13.8386        | 12.8387        | 13.3626        |
| 30              | 14.809          | 17.257          | 11.6793        | 12.1841        | 13.2939        | 13.4305        |
| 16.5208         | 14.2401         | 15.195          | 13.0949        | 13.304         | 13.6054        | 14.3046        |
| 17.2481         | 13.9015         | 15.5677         | 10.8877        | 11.3434        | 12.646         | 12.8446        |
| 30              | 14.703          | 16.279          | 12.5851        | 12.9295        | 14.3665        | 15.7718        |
| 16.31           | 14.9337         | 16.3239         | 12.9944        | 12.8604        | 15.2008        | 16.7713        |

|         |         |         |         |         |         |         |
|---------|---------|---------|---------|---------|---------|---------|
| 17.9744 | 14.8365 | 16.0945 | 13.6637 | 14.2169 | 14.2393 | 14.7566 |
| 30      | 13.9428 | 15.9792 | 12.0032 | 12.1249 | 12.7278 | 13.3902 |
| 17.8288 | 14.8347 | 16.3894 | 12.8115 | 13.434  | 15.0542 | 15.0173 |
| 15.9994 | 16.0802 | 16.9405 | 14.1134 | 13.883  | 12.7266 | 13.5121 |
| 30      | 14.4063 | 16.5942 | 14.6789 | 14.6959 | 15.8132 | 18.015  |
| 16.4936 | 16.7271 | 17.0777 | 12.8403 | 12.8405 | 14.8969 | 14.0545 |
| 15.3573 | 14.4698 | 15.6566 | 12.4708 | 12.8158 | 15.4797 | 15.0239 |
| 18.065  | 16.0254 | 18.4258 | 13.8635 | 13.5177 | 16.8005 | 16.657  |
| 25.2109 | 14.9161 | 16.2679 | 12.6642 | 12.9222 | 12.4873 | 13.5032 |
| 22.635  | 16.0026 | 16.642  | 13.6088 | 13.894  | 14.1286 | 14.6482 |
| 18.3298 | 15.4172 | 17.5061 | 12.5085 | 12.7969 | 12.7822 | 13.8139 |
| 16.7183 | 15.4019 | 16.3769 | 11.6484 | 11.8282 | 13.6391 | 13.5822 |
| 16.0655 | 13.8315 | 14.5801 | 12.1891 | 12.0625 | 13.4476 | 13.9283 |
| 30      | 15.1135 | 15.6266 | 13.3521 | 13.4983 | 15.1385 | 14.6646 |
| 30      | 15.1973 | 17.2257 | 17.9819 | 18.9515 | 15.434  | 14.8979 |
| 19.2287 | 14.6418 | 16.5432 | 12.3156 | 12.8419 | 12.705  | 13.3942 |
| 19.2046 | 14.6223 | 15.9345 | 11.9557 | 11.9166 | 12.7068 | 13.0583 |
| 30      | 15.5682 | 17.4966 | 11.813  | 12.2396 | 13.811  | 14.0762 |
| 30      | 17.9997 | 17.7579 | 15.7585 | 16.2616 | 17.5011 | 30      |
| 17.0584 | 17.785  | 19.5125 | 13.376  | 14.1026 | 15.9575 | 16.937  |
| 17.8534 | 15.3077 | 16.4853 | 13.5358 | 13.8284 | 12.1143 | 12.7417 |
| 13.8322 | 16.1651 | 15.4498 | 16.2894 | 13.4449 | 13.3389 | 12.4254 |

| Notch1_A57 | Notch1_A69 | Numb_A81 | Numb_A93 | Olfm4_A10 | Olfm4_A22 | Pcna_A34 |
|------------|------------|----------|----------|-----------|-----------|----------|
| 15.2176    | 15.4388    | 18.6512  | 15.038   | 9.6191    | 18.674    | 14.3157  |
| 15.3922    | 15.0092    | 17.1996  | 15.1938  | 8.23569   | 13.166    | 13.6614  |
| 14.6389    | 17.3275    | 15.9339  | 14.2872  | 9.24069   | 30        | 11.6581  |
| 14.2543    | 15.1067    | 16.4486  | 14.906   | 10.0267   | 20.3527   | 11.353   |
| 13.9667    | 14.0474    | 19.88    | 15.7466  | 7.15418   | 11.6557   | 16.0387  |
| 15.2478    | 15.3669    | 18.5457  | 16.7328  | 11.6337   | 16.4135   | 11.8669  |
| 16.3894    | 18.2496    | 18.6476  | 15.8027  | 7.28213   | 13.4692   | 13.0853  |
| 21.5775    | 30         | 22.3351  | 17.4282  | 18.3995   | 16.9526   | 16.2383  |
| 14.7217    | 15.6101    | 17.7937  | 15.5144  | 9.324     | 14.3515   | 12.8622  |
| 14.5316    | 14.6774    | 17.4921  | 16.3246  | 9.57129   | 13.6796   | 12.7082  |
| 14.5567    | 14.22      | 16.1652  | 14.2617  | 6.73217   | 13.5648   | 11.7777  |
| 15.3531    | 17.389     | 16.6636  | 18.2238  | 9.66427   | 13.1705   | 12.6888  |
| 15.7283    | 18.1739    | 18.5088  | 15.4903  | 12.8595   | 17.5435   | 15.9999  |
| 17.6362    | 16.2315    | 17.0233  | 15.351   | 9.92497   | 16.1336   | 13.7803  |
| 15.9717    | 15.5014    | 15.7993  | 14.6285  | 11.2879   | 14.9106   | 11.5947  |
| 15.971     | 15.9254    | 30       | 30       | 8.49069   | 18.3088   | 16.9152  |
| 14.5303    | 15.352     | 21.4253  | 15.9896  | 8.0099    | 16.2931   | 16.3377  |
| 14.4061    | 14.564     | 16.2452  | 14.7955  | 7.73463   | 16.249    | 10.6826  |
| 14.2269    | 14.0848    | 18.4757  | 15.8998  | 8.35191   | 14.7525   | 12.5011  |
| 15.7523    | 15.2818    | 17.8308  | 15.3433  | 10.5486   | 17.6436   | 14.4015  |
| 18.0153    | 18.2618    | 20.4799  | 18.0457  | 10.0787   | 13.3188   | 15.7731  |
| 16.3114    | 15.1472    | 20.2418  | 17.5458  | 8.89358   | 14.6956   | 14.0601  |
| 19.496     | 19.6249    | 19.6772  | 15.9967  | 15.3328   | 14.5271   | 16.486   |
| 14.0358    | 15.033     | 18.4576  | 17.4734  | 18.106    | 16.4798   | 16.3807  |
| 15.067     | 14.9377    | 16.208   | 17.6398  | 9.55583   | 14.3955   | 15.78    |
| 13.7746    | 15.4954    | 20.7229  | 16.411   | 8.9926    | 13.0551   | 14.8252  |
| 14.4985    | 15.829     | 19.6713  | 17.1439  | 9.12827   | 13.6719   | 17.6334  |
| 15.2725    | 24.181     | 23.449   | 18.1743  | 14.8276   | 18.4839   | 16.898   |
| 15.5549    | 30         | 18.5528  | 30       | 16.9798   | 30        | 30       |
| 14.0386    | 16.2441    | 18.0037  | 15.3691  | 8.71101   | 12.9696   | 13.8395  |
| 14.73      | 18.3464    | 18.842   | 15.4756  | 8.87653   | 13.5249   | 13.638   |
| 15.0484    | 16.4557    | 17.9098  | 17.2619  | 9.49041   | 14.3387   | 12.9436  |
| 16.3233    | 19.5078    | 19.583   | 17.8506  | 30        | 18.1304   | 17.1804  |
| 15.4935    | 16.8023    | 19.1226  | 16.3266  | 9.49816   | 15.2158   | 13.5848  |
| 14.867     | 15.2646    | 17.3915  | 15.6326  | 8.97719   | 14.0847   | 15.3248  |
| 17.1302    | 16.6899    | 16.2219  | 15.0917  | 9.32463   | 17.8051   | 14.705   |
| 14.3025    | 14.2158    | 17.1859  | 14.9162  | 7.78897   | 12.4567   | 15.3945  |
| 14.3782    | 14.6063    | 16.2118  | 13.977   | 8.19767   | 17.1364   | 11.2988  |
| 16.0263    | 18.6169    | 15.9603  | 14.6295  | 15.6313   | 23.0188   | 15.8653  |
| 17.3352    | 18.3665    | 17.462   | 16.9433  | 8.60304   | 14.9725   | 15.7689  |

|         |         |         |         |         |         |         |
|---------|---------|---------|---------|---------|---------|---------|
| 15.1735 | 14.5415 | 21.6412 | 18.2092 | 9.74137 | 18.6803 | 12.2693 |
| 15.6706 | 15.6926 | 17.0082 | 16.1685 | 12.6748 | 18.249  | 13.8608 |
| 15.2509 | 15.0595 | 16.9672 | 15.6704 | 9.29801 | 16.6837 | 14.9874 |
| 16.2427 | 17.43   | 17.9146 | 17.5519 | 9.68402 | 14.5332 | 15.1389 |
| 15.7023 | 16.5687 | 15.9694 | 14.2309 | 16.5759 | 19.0367 | 15.1942 |
| 15.3762 | 15.5571 | 19.215  | 14.9965 | 9.78901 | 15.4343 | 15.1201 |
| 16.6918 | 15.8353 | 19.6861 | 18.1893 | 9.7193  | 14.4269 | 15.5937 |
| 15.0072 | 15.6484 | 19.8969 | 16.9967 | 8.37158 | 14.7197 | 15.2025 |
| 17.8853 | 18.6996 | 18.7849 | 16.0252 | 12.4413 | 30      | 11.9061 |
| 16.7373 | 17.0818 | 16.6996 | 15.2177 | 10.8532 | 30      | 11.6933 |
| 16.2296 | 15.6306 | 18.1522 | 19.1333 | 9.20324 | 15.0397 | 12.2643 |
| 14.8641 | 16.2039 | 16.4364 | 15.3768 | 7.44791 | 11.6947 | 13.0738 |
| 14.6229 | 14.7371 | 18.6189 | 15.8731 | 8.69678 | 13.9366 | 13.7676 |
| 16.0904 | 16.9921 | 18.1481 | 16.9238 | 8.54468 | 13.4631 | 13.2798 |
| 16.3467 | 30      | 20.7727 | 17.7008 | 16.3322 | 16.7302 | 15.677  |
| 14.4227 | 15.7727 | 17.3248 | 15.5021 | 7.74809 | 14.2469 | 13.009  |
| 15.1193 | 15.9546 | 16.944  | 15.6299 | 11.0068 | 18.1175 | 11.1507 |
| 17.3557 | 16.9675 | 16.6757 | 14.4928 | 16.2708 | 30      | 14.6068 |
| 22.6833 | 30      | 18.5978 | 15.9505 | 18.1395 | 30      | 15.2768 |
| 17.7253 | 15.9811 | 30      | 18.5926 | 9.92305 | 15.8142 | 15.6949 |
| 17.2299 | 17.5771 | 23.7052 | 18.7148 | 11.5319 | 18.6492 | 15.5561 |
| 12.5303 | 15.5475 | 15.7909 | 16.9203 | 16.8701 | 8.88509 | 14.3189 |

| Pcna_A46 | Ppargc1b_A5 | Ppargc1b_A7 | Rhoa_A82 | Rhoa_A94 | Saa2_A11 | Saa2_A23 |
|----------|-------------|-------------|----------|----------|----------|----------|
| 12.4696  | 15.3052     | 14.0226     | 12.6424  | 14.9059  | 22.7274  | 18.2754  |
| 12.1869  | 16.3885     | 19.4867     | 12.1608  | 13.4779  | 30       | 19.3223  |
| 10.5277  | 15.3145     | 13.8764     | 11.52    | 12.7606  | 30       | 17.2976  |
| 9.72205  | 14.8594     | 13.1374     | 9.6601   | 11.4638  | 30       | 15.7139  |
| 14.0804  | 14.7669     | 14.7462     | 11.9098  | 13.5051  | 19.1318  | 17.3312  |
| 10.4827  | 18.0932     | 14.4111     | 11.8922  | 13.8032  | 20.1301  | 17.9208  |
| 10.6423  | 16.0902     | 15.5615     | 10.767   | 13.1938  | 22.7823  | 18.8155  |
| 17.8073  | 30          | 18.2572     | 13.0433  | 13.9983  | 30       | 30       |
| 10.8923  | 16.9486     | 14.674      | 12.1755  | 13.5393  | 22.3876  | 17.2917  |
| 11.4929  | 17.906      | 18.0214     | 11.8619  | 13.6204  | 30       | 21.303   |
| 9.91511  | 15.2254     | 13.1907     | 10.002   | 12.0213  | 23.6848  | 17.176   |
| 10.8001  | 17.2071     | 14.7585     | 10.7233  | 12.9208  | 22.8244  | 17.7614  |
| 14.1564  | 30          | 15.3968     | 11.8725  | 13.1093  | 30       | 19.4566  |
| 11.3099  | 16.6164     | 14.1007     | 11.2474  | 13.9753  | 23.2363  | 18.754   |
| 9.78022  | 14.2092     | 12.2523     | 9.48178  | 11.4862  | 19.7386  | 16.648   |
| 14.1103  | 30          | 17.6901     | 13.802   | 15.2824  | 23.7025  | 19.9835  |
| 14.5389  | 16.0417     | 14.215      | 12.4332  | 14.9866  | 18.8833  | 16.7839  |
| 9.2316   | 14.1331     | 12.4001     | 10.6178  | 12.3019  | 30       | 17.0748  |
| 11.227   | 15.527      | 14.9806     | 12.2023  | 13.8339  | 19.4404  | 17.228   |
| 13.6625  | 15.1616     | 13.2576     | 11.6208  | 13.2402  | 30       | 20.7381  |
| 14.01    | 30          | 16.3855     | 13.3747  | 15.2651  | 30       | 30       |
| 11.7142  | 16.2737     | 14.6057     | 12.0351  | 14.6407  | 18.6354  | 17.7356  |
| 16.5445  | 30          | 18.0227     | 14.0032  | 15.6111  | 20.8868  | 17.3613  |
| 15.7696  | 30          | 30          | 13.4096  | 14.8082  | 20.0161  | 16.7231  |
| 14.5211  | 18.7007     | 15.3836     | 13.3738  | 15.8178  | 21.0435  | 18.7362  |
| 13.1396  | 18.3922     | 15.2527     | 12.7398  | 14.4654  | 30       | 19.3171  |
| 15.0295  | 18.3322     | 14.9844     | 13.139   | 15.2732  | 19.9419  | 17.1262  |
| 17.4256  | 18.955      | 19.1691     | 14.2875  | 14.9297  | 30       | 19.7386  |
| 16.6311  | 30          | 30          | 13.1255  | 14.1432  | 30       | 16.2325  |
| 11.5128  | 15.752      | 15.2614     | 13.2333  | 14.9126  | 30       | 22.2745  |
| 13.0383  | 14.8645     | 14.3298     | 11.8726  | 12.8682  | 22.4983  | 18.823   |
| 11.8011  | 15.5002     | 13.1249     | 12.0339  | 13.665   | 30       | 16.4117  |
| 14.7342  | 30          | 30          | 13.2647  | 15.1716  | 30       | 30       |
| 12.5727  | 18.7106     | 15.3163     | 13.0713  | 14.477   | 30       | 26.5346  |
| 14.5637  | 17.5562     | 14.09       | 12.2034  | 13.4941  | 23.2599  | 17.4572  |
| 14.1357  | 13.9979     | 13.2639     | 11.1387  | 13.1552  | 18.4948  | 17.4594  |
| 13.8012  | 15.9122     | 15.5913     | 11.5079  | 13.4341  | 19.0894  | 17.4075  |
| 9.68521  | 13.7486     | 12.068      | 10.1659  | 12.1007  | 20.6637  | 18.1974  |
| 14.0731  | 14.3487     | 12.7002     | 11.1233  | 12.6827  | 30       | 18.8427  |
| 15.7197  | 15.8788     | 14.0436     | 12.1154  | 14.0472  | 30       | 30       |



|         |         |         |         |         |         |         |
|---------|---------|---------|---------|---------|---------|---------|
| 10.7981 | 16.9954 | 14.7664 | 11.8202 | 13.5927 | 19.917  | 18.0739 |
| 12.2621 | 14.3421 | 12.6266 | 10.0469 | 12.0629 | 19.9361 | 17.1773 |
| 13.2782 | 16.5661 | 15.0289 | 12.2048 | 14.2253 | 20.4865 | 17.556  |
| 13.6955 | 17.3344 | 14.1942 | 12.9665 | 14.5761 | 23.4169 | 16.9735 |
| 13.5508 | 15.0411 | 12.8981 | 11.6795 | 13.4611 | 30      | 30      |
| 13.7927 | 15.2364 | 13.6782 | 12.5259 | 14.8104 | 30      | 30      |
| 13.7962 | 16.0732 | 13.9506 | 11.5247 | 13.7238 | 23.2953 | 21.0562 |
| 14.6647 | 17.0504 | 15.4323 | 14.2228 | 16.0616 | 19.7496 | 16.6526 |
| 11.3178 | 16.2549 | 13.8248 | 12.6773 | 14.0633 | 18.0059 | 17.3317 |
| 10.6209 | 16.4122 | 14.1918 | 11.5775 | 12.9426 | 21.2554 | 16.7071 |
| 11.3385 | 17.069  | 14.8931 | 13.4821 | 14.401  | 30      | 19.424  |
| 11.7292 | 15.7437 | 14.1607 | 11.0588 | 13.4323 | 22.4651 | 18.3505 |
| 13.1976 | 16.7241 | 14.3702 | 11.9978 | 13.3593 | 18.7328 | 16.605  |
| 12.0733 | 16.929  | 16.6742 | 12.845  | 13.8264 | 30      | 20.6145 |
| 13.474  | 30      | 30      | 12.3402 | 14.2091 | 30      | 27.3716 |
| 11.8499 | 16.8448 | 15.488  | 11.7788 | 13.1799 | 20.3232 | 15.7024 |
| 10.3897 | 14.7885 | 13.6285 | 11.8284 | 12.8987 | 21.6594 | 16.2358 |
| 13.1008 | 14.4167 | 12.366  | 10.4944 | 12.5051 | 19.978  | 17.6281 |
| 14.2933 | 16.6183 | 15.056  | 11.9822 | 13.1193 | 21.2428 | 16.7822 |
| 13.8797 | 30      | 17.3282 | 13.9485 | 14.8335 | 30      | 30      |
| 14.38   | 16.1542 | 15.0507 | 14.1713 | 14.9129 | 25.5936 | 20.9349 |
| 13.5374 | 16.6305 | 16.303  | 12.1606 | 14.1705 | 30      | 30      |

| Sirt3_A35 | Sirt3_A47 | Sox9_A59 | Sox9_A71 | Tat_A83 | Tat_A95 | Tcf4_A12 |
|-----------|-----------|----------|----------|---------|---------|----------|
| 19.1006   | 17.3403   | 14.3247  | 24.9901  | 30      | 30      | 17.1718  |
| 19.6493   | 18.5129   | 12.4238  | 21.5184  | 30      | 30      | 14.8529  |
| 30        | 30        | 14.1598  | 23.8004  | 30      | 30      | 16.121   |
| 17.3753   | 15.983    | 11.2416  | 20.7033  | 30      | 30      | 14.748   |
| 17.0541   | 17.3965   | 12.8613  | 21.9854  | 30      | 30      | 15.7953  |
| 17.332    | 16.7119   | 14.0751  | 23.5024  | 30      | 30      | 15.4158  |
| 17.9467   | 17.2419   | 12.4039  | 22.1204  | 30      | 30      | 15.9849  |
| 30        | 16.8295   | 12.9796  | 22.1394  | 30      | 30      | 17.1106  |
| 30        | 30        | 14.6474  | 24.3204  | 30      | 30      | 17.8718  |
| 23.3018   | 30        | 13.8453  | 24.195   | 30      | 30      | 18.2157  |
| 18.7549   | 16.6369   | 11.4754  | 21.1746  | 30      | 30      | 14.9676  |
| 17.4831   | 18.4585   | 12.1889  | 21.8053  | 30      | 30      | 16.3074  |
| 17.6824   | 17.5166   | 12.9717  | 21.6962  | 30      | 30      | 15.6488  |
| 18.4371   | 30        | 14.7694  | 21.8659  | 30      | 30      | 17.9729  |
| 17.5928   | 17.376    | 12.2053  | 21.6774  | 30      | 30      | 14.4231  |
| 30        | 17.8083   | 14.6691  | 23.8253  | 30      | 30      | 17.1073  |
| 17.0932   | 21.3394   | 14.6467  | 22.9139  | 30      | 30      | 15.3186  |
| 17.2105   | 18.6004   | 13.3581  | 24.2372  | 30      | 30      | 13.5016  |
| 30        | 23.5979   | 13.1419  | 22.1022  | 30      | 30      | 16.3119  |
| 17.2182   | 17.7574   | 14.0416  | 23.6381  | 30      | 30      | 15.3588  |
| 24.2663   | 18.355    | 13.868   | 23.8642  | 30      | 30      | 17.5392  |
| 18.9251   | 18.9511   | 14.9053  | 27.7776  | 30      | 30      | 17.8885  |
| 17.8921   | 30        | 12.0985  | 20.4578  | 30      | 30      | 16.9145  |
| 18.6966   | 18.202    | 12.589   | 22.2928  | 30      | 30      | 17.2602  |
| 30        | 18.6985   | 15.9632  | 24.1347  | 30      | 30      | 16.5761  |
| 18.3959   | 19.4174   | 13.4347  | 23.2937  | 30      | 30      | 16.3402  |
| 30        | 30        | 14.7985  | 25.1162  | 30      | 30      | 16.8035  |
| 25.91     | 20.4422   | 16.9692  | 30       | 30      | 30      | 23.5667  |
| 17.9101   | 17.7798   | 30       | 30       | 30      | 30      | 30       |
| 20.315    | 21.4899   | 14.4649  | 23.6215  | 30      | 30      | 16.3977  |
| 21.3053   | 17.1564   | 14.428   | 24.6682  | 30      | 30      | 18.3299  |
| 30        | 17.6446   | 14.6134  | 27.4305  | 30      | 30      | 16.6947  |
| 30        | 19.0823   | 14.7024  | 27.8452  | 30      | 30      | 17.8184  |
| 30        | 17.9148   | 13.792   | 23.3739  | 30      | 30      | 16.8173  |
| 19.9548   | 17.6202   | 13.7222  | 23.7435  | 30      | 30      | 17.9748  |
| 16.4928   | 18.4113   | 14.0492  | 24.0859  | 30      | 30      | 14.2575  |
| 30        | 18.418    | 11.925   | 21.7393  | 30      | 30      | 15.5015  |
| 17.7485   | 16.5603   | 12.0734  | 21.8525  | 30      | 30      | 15.0244  |
| 17.6      | 15.8657   | 14.2785  | 25.3699  | 30      | 30      | 15.554   |
| 30        | 17.4627   | 13.4528  | 23.1352  | 30      | 30      | 16.234   |

|         |         |         |         |        |    |         |
|---------|---------|---------|---------|--------|----|---------|
| 19.1859 | 21.4022 | 14.9159 | 28.4803 | 30     | 30 | 15.8078 |
| 16.7296 | 16.9732 | 13.7646 | 20.9038 | 30     | 30 | 15.1768 |
| 30      | 18.2888 | 14.8529 | 23.6261 | 30     | 30 | 17.7974 |
| 17.7071 | 17.8177 | 14.3054 | 24.4295 | 30     | 30 | 17.0643 |
| 16.6828 | 17.7512 | 14.7749 | 23.5967 | 30     | 30 | 16.6345 |
| 20.3062 | 19.5185 | 13.9213 | 23.7167 | 30     | 30 | 16.7855 |
| 17.4773 | 17.5569 | 13.7515 | 23.3706 | 30     | 30 | 16.4023 |
| 18.6161 | 19.2435 | 13.6954 | 25.3092 | 30     | 30 | 17.3111 |
| 18.0608 | 18.3651 | 14.4813 | 23.3765 | 30     | 30 | 15.8868 |
| 15.9514 | 15.5782 | 14.9994 | 24.1451 | 30     | 30 | 16.078  |
| 19.3136 | 19.0405 | 14.1655 | 22.8591 | 30     | 30 | 15.8092 |
| 30      | 30      | 12.7918 | 23.5391 | 30     | 30 | 15.5489 |
| 17.1588 | 16.5011 | 12.7413 | 22.9627 | 30     | 30 | 14.499  |
| 30      | 30      | 14.1121 | 23.625  | 30     | 30 | 14.9557 |
| 24.1883 | 30      | 14.4998 | 24.7588 | 30     | 30 | 14.2428 |
| 21.532  | 17.8032 | 13.229  | 22.6707 | 30     | 30 | 15.8386 |
| 15.786  | 16.798  | 14.8588 | 24.4076 | 30     | 30 | 15.5837 |
| 16.7845 | 19.1087 | 14.4968 | 24.4199 | 30     | 30 | 14.1249 |
| 19.9506 | 17.9302 | 16.2941 | 30      | 26.078 | 30 | 15.6117 |
| 30      | 30      | 14.8529 | 24.7319 | 30     | 30 | 30      |
| 22.9987 | 18.9545 | 14.9948 | 23.8492 | 30     | 30 | 18.1047 |
| 19.0867 | 18.3463 | 12.9996 | 24.7278 | 30     | 30 | 16.3543 |

| Tcf7l2_A24 | Tert_A36 | Tert_A48 | Wnt3_A60 | Wnt3_A72 | Wnt6_A84 | Wnt6_A96 |
|------------|----------|----------|----------|----------|----------|----------|
| 25.312     | 30       | 30       | 30       | 21.4849  | 30       | 24.4848  |
| 19.2431    | 30       | 30       | 17.5196  | 18.8334  | 30       | 27.7374  |
| 20.0131    | 18.7205  | 20.8949  | 30       | 30       | 30       | 30       |
| 19.4178    | 18.6701  | 18.1238  | 30       | 30       | 20.6664  | 30       |
| 22.0941    | 30       | 30       | 17.1312  | 17.3837  | 30       | 27.1279  |
| 17.7138    | 30       | 30       | 15.4986  | 18.3057  | 30       | 25.3756  |
| 18.9695    | 30       | 30       | 30       | 30       | 30       | 30       |
| 21.1224    | 30       | 30       | 30       | 30       | 30       | 30       |
| 21.3235    | 19.4836  | 30       | 30       | 30       | 30       | 30       |
| 21.336     | 30       | 30       | 30       | 30       | 30       | 30       |
| 17.7277    | 18.2871  | 30       | 30       | 30       | 30       | 25.9125  |
| 21.6897    | 18.5405  | 30       | 30       | 30       | 30       | 30       |
| 19.6738    | 30       | 30       | 30       | 30       | 21.3415  | 21.5568  |
| 26.4592    | 30       | 30       | 30       | 30       | 30       | 30       |
| 17.4803    | 18.6774  | 30       | 30       | 30       | 21.2716  | 24.9041  |
| 19.2992    | 30       | 30       | 30       | 22.4124  | 30       | 30       |
| 20.3529    | 30       | 30       | 30       | 30       | 30       | 25.7745  |
| 16.949     | 18.4355  | 18.7438  | 30       | 30       | 30       | 24.8011  |
| 21.4175    | 16.3573  | 18.5179  | 30       | 26.1443  | 30       | 30       |
| 18.0908    | 30       | 30       | 30       | 25.4563  | 30       | 23.5546  |
| 23.7182    | 30       | 30       | 30       | 30       | 30       | 30       |
| 21.6037    | 30       | 30       | 30       | 18.754   | 30       | 27.7209  |
| 23.1251    | 30       | 30       | 30       | 23.2925  | 30       | 25.26    |
| 19.8973    | 30       | 18.8544  | 16.5772  | 19.489   | 30       | 30       |
| 20.7708    | 17.1051  | 19.7202  | 30       | 30       | 30       | 30       |
| 19.4673    | 21.8083  | 30       | 30       | 18.8557  | 30       | 30       |
| 23.2414    | 16.4319  | 19.0321  | 17.8014  | 18.5677  | 30       | 25.962   |
| 30         | 30       | 30       | 30       | 22.0392  | 30       | 30       |
| 30         | 30       | 30       | 16.12    | 16.2667  | 30       | 30       |
| 19.6463    | 30       | 30       | 30       | 30       | 30       | 30       |
| 22.7725    | 19.3069  | 30       | 30       | 30       | 30       | 30       |
| 23.6669    | 26.7276  | 30       | 17.7105  | 25.008   | 30       | 25.4277  |
| 20.6391    | 30       | 30       | 14.2543  | 15.9413  | 30       | 30       |
| 22.9404    | 30       | 30       | 30       | 30       | 30       | 30       |
| 22.7219    | 18.6867  | 30       | 30       | 30       | 30       | 30       |
| 18.1802    | 30       | 30       | 30       | 30       | 30       | 30       |
| 19.7202    | 18.5348  | 30       | 30       | 30       | 30       | 30       |
| 19.3012    | 18.7223  | 19.2278  | 30       | 30       | 30       | 30       |
| 19.0847    | 30       | 30       | 30       | 30       | 30       | 30       |
| 21.7439    | 30       | 30       | 30       | 30       | 30       | 30       |

|         |         |         |         |         |         |         |
|---------|---------|---------|---------|---------|---------|---------|
| 18.464  | 26.1273 | 30      | 30      | 30      | 30      | 30      |
| 19.074  | 30      | 21.6987 | 30      | 22.6527 | 30      | 24.802  |
| 22.4796 | 30      | 30      | 30      | 25.3795 | 21.3518 | 20.9373 |
| 22.4665 | 30      | 30      | 30      | 30      | 30      | 30      |
| 19.5788 | 18.5038 | 17.9155 | 30      | 30      | 30      | 30      |
| 21.0633 | 30      | 30      | 30      | 30      | 30      | 30      |
| 21.0928 | 18.5582 | 18.6724 | 30      | 30      | 30      | 30      |
| 21.1489 | 30      | 30      | 30      | 27.4868 | 30      | 30      |
| 20.5511 | 30      | 30      | 30      | 18.8286 | 30      | 26.9279 |
| 20.0235 | 30      | 18.4407 | 21.2916 | 18.08   | 30      | 23.3938 |
| 18.5957 | 18.3387 | 20.5749 | 30      | 30      | 30      | 30      |
| 18.9642 | 15.9426 | 17.9115 | 17.8266 | 23.0777 | 30      | 30      |
| 19.3145 | 17.1187 | 19.7182 | 30      | 30      | 30      | 30      |
| 19.7176 | 17.1197 | 30      | 30      | 30      | 30      | 30      |
| 17.9292 | 30      | 30      | 12.5546 | 13.6697 | 30      | 30      |
| 22.6931 | 18.3628 | 19.9751 | 30      | 26.112  | 30      | 26.7763 |
| 19.1661 | 30      | 30      | 30      | 30      | 30      | 24.0725 |
| 18.8649 | 17.7385 | 19.3903 | 30      | 30      | 30      | 28.6273 |
| 20.9953 | 27.2457 | 30      | 30      | 30      | 30      | 30      |
| 20.2564 | 30      | 30      | 18.0565 | 19.7582 | 30      | 27.9184 |
| 21.6446 | 30      | 30      | 30      | 18.9288 | 30      | 27.286  |
| 21.0158 | 30      | 30      | 30      | 30      | 30      | 26.1155 |

| sampleID | Group      | Areg_A01 | Areg_A13 | Ascl2_A25 | Ascl2_A37 | Atoh1_A49 |
|----------|------------|----------|----------|-----------|-----------|-----------|
| S10      | Lgr5-CreER | 30       | 27.6174  | 16.2635   | 30        | 17.0024   |
| S11      | Lgr5-CreER | 30       | 30       | 14.162    | 14.2138   | 27.6955   |
| S12      | Lgr5-CreER | 30       | 30       | 14.4347   | 16.1906   | 19.0003   |
| S21      | Lgr5-CreER | 30       | 27.7218  | 14.2629   | 14.6713   | 17.6581   |
| S22      | Lgr5-CreER | 30       | 30       | 14.3204   | 15.9904   | 17.9765   |
| S23      | Lgr5-CreER | 30       | 30       | 15.5141   | 26.5983   | 16.8986   |
| S24      | Lgr5-CreER | 30       | 30       | 14.0727   | 14.0054   | 30        |
| S33      | Lgr5-CreER | 30       | 30       | 14.2826   | 15.2748   | 27.4479   |
| S34      | Lgr5-CreER | 30       | 30       | 15.382    | 17.6198   | 14.7247   |
| S35      | Lgr5-CreER | 30       | 30       | 16.5456   | 19.121    | 18.07     |
| S36      | Lgr5-CreER | 30       | 30       | 14.4859   | 18.9437   | 18.0436   |
| S45      | Lgr5-CreER | 30       | 30       | 23.2659   | 30        | 22.9103   |
| S46      | Lgr5-CreER | 30       | 30       | 13.5377   | 14.2797   | 18.7725   |
| S47      | Lgr5-CreER | 30       | 30       | 14.0714   | 14.4689   | 30        |
| S48      | Lgr5-CreER | 30       | 30       | 18.4059   | 30        | 21.3365   |
| S57      | Lgr5-CreER | 30       | 30       | 15.0116   | 17.946    | 17.6562   |
| S58      | Lgr5-CreER | 30       | 30       | 12.2268   | 14.9297   | 16.7603   |
| S59      | Lgr5-CreER | 30       | 30       | 14.6979   | 16.0564   | 30        |
| S60      | Lgr5-CreER | 30       | 18.7564  | 13.2863   | 15.4195   | 17.3623   |
| S69      | Lgr5-CreER | 30       | 30       | 14.6605   | 15.12     | 30        |
| S70      | Lgr5-CreER | 30       | 30       | 14.7505   | 30        | 18.9083   |
| S71      | Lgr5-CreER | 30       | 30       | 14.238    | 14.4375   | 17.6928   |
| S72      | Lgr5-CreER | 30       | 30       | 13.8784   | 14.5529   | 17.1916   |
| S81      | Lgr5-CreER | 30       | 30       | 12.8012   | 14.268    | 15.8099   |
| S82      | Lgr5-CreER | 30       | 30       | 15.9307   | 30        | 30        |
| S83      | Lgr5-CreER | 30       | 30       | 15.9543   | 16.4016   | 19.4673   |
| S84      | Lgr5-CreER | 30       | 30       | 16.927    | 18.7781   | 22.4872   |
| S93      | Lgr5-CreER | 30       | 30       | 14.6568   | 16.4157   | 30        |
| S94      | Lgr5-CreER | 30       | 30       | 14.7692   | 16.2505   | 18.4755   |
| S95      | Lgr5-CreER | 30       | 24.8523  | 15.3486   | 17.7081   | 20.0556   |
| S96      | Lgr5-CreER | 30       | 30       | 16.2857   | 18.146    | 18.705    |

| Atoh1_A61 | Axin2_A73 | Axin2_A85 | Bmi1_A02 | Bmi1_A14 | Bmpr1a_A26 | Bmpr1a_A38 |
|-----------|-----------|-----------|----------|----------|------------|------------|
| 19.6194   | 13.5863   | 16.0509   | 14.2578  | 13.3998  | 16.64      | 16.1505    |
| 30        | 11.9576   | 13.6128   | 14.5002  | 14.4066  | 16.2815    | 15.7644    |
| 21.5508   | 11.5944   | 12.9077   | 15.2041  | 15.3683  | 15.0253    | 14.5739    |
| 17.9465   | 11.7044   | 13.1553   | 15.5235  | 14.23    | 14.1405    | 15.0958    |
| 17.6399   | 11.4843   | 12.6357   | 15.0946  | 13.705   | 13.9244    | 14.6853    |
| 24.1602   | 13.2185   | 14.3714   | 16.7927  | 16.2049  | 14.4907    | 15.9128    |
| 30        | 10.9915   | 12.8763   | 15.4378  | 15.3052  | 13.6509    | 14.9731    |
| 30        | 12.9052   | 14.2636   | 16.4015  | 14.8661  | 14.8543    | 15.6792    |
| 15.2932   | 12.9774   | 14.3529   | 15.8422  | 16.1525  | 15.3324    | 15.3697    |
| 19.3028   | 11.9375   | 13.4382   | 16.0848  | 15.9537  | 15.3655    | 15.4453    |
| 16.4031   | 12.9115   | 14.8259   | 22.8196  | 16.1659  | 14.8637    | 15.9611    |
| 18.4538   | 14.121    | 15.1445   | 18.1476  | 16.1425  | 15.4194    | 14.4364    |
| 21.9532   | 11.2626   | 12.5507   | 14.8637  | 14.9756  | 13.7962    | 14.536     |
| 30        | 12.2325   | 13.3363   | 17.9018  | 18.253   | 15.3849    | 15.6673    |
| 19.743    | 12.7222   | 13.8059   | 13.1207  | 13.3474  | 13.1842    | 13.8526    |
| 21.0609   | 12.576    | 14.4784   | 17.8662  | 15.6527  | 14.8541    | 15.3431    |
| 18.1328   | 10.3736   | 11.5136   | 13.8877  | 12.7062  | 12.6743    | 12.4451    |
| 30        | 12.8374   | 14.0049   | 17.1348  | 14.841   | 15.0576    | 15.7575    |
| 16.2241   | 11.4796   | 13.1114   | 13.7349  | 13.6599  | 13.2107    | 13.4036    |
| 30        | 12.1958   | 13.2463   | 30       | 23.8516  | 13.7078    | 14.4117    |
| 30        | 12.5252   | 14.0061   | 17.6366  | 16.7952  | 15.3224    | 16.4982    |
| 17.9494   | 12.723    | 13.9373   | 19.8479  | 16.0533  | 14.4782    | 14.7619    |
| 23.9828   | 11.4685   | 13.4134   | 14.9348  | 14.3636  | 14.7023    | 14.3905    |
| 15.1388   | 10.8913   | 12.2498   | 14.7276  | 13.3618  | 12.3668    | 13.3114    |
| 20.3675   | 13.8072   | 14.6445   | 16.8396  | 14.7754  | 14.6303    | 14.9163    |
| 17.6885   | 12.9386   | 14.4641   | 15.1968  | 17.1106  | 15.3244    | 15.5854    |
| 19.04     | 13.143    | 14.7956   | 18.0026  | 16.8297  | 16.1077    | 16.1337    |
| 25.9911   | 12.0836   | 14.6695   | 16.2044  | 18.9938  | 14.5075    | 14.4097    |
| 19.1281   | 13.447    | 15.2109   | 15.0425  | 15.3039  | 16.2637    | 15.5735    |
| 23.0168   | 12.2765   | 14.2319   | 16.4711  | 15.5688  | 14.3923    | 15.7915    |
| 23.1341   | 12.5708   | 14.3692   | 16.1719  | 15.3246  | 14.0588    | 14.8207    |

| Ccnd1_A50 | Ccnd1_A62 | Cdkn1a_A74 | Cdkn1a_A86 | Cdx1_A03 | Cdx1_A15 | Chga_A27 |
|-----------|-----------|------------|------------|----------|----------|----------|
| 19.2246   | 16.8735   | 13.6049    | 14.173     | 17.4175  | 17.0431  | 30       |
| 15.1914   | 12.6681   | 17.5343    | 20.8818    | 17.6092  | 18.71    | 30       |
| 16.6945   | 13.6532   | 18.7972    | 24.8527    | 17.445   | 17.7552  | 30       |
| 17.6529   | 15.5848   | 18.785     | 20.3206    | 17.1325  | 17.4993  | 19.0295  |
| 17.8534   | 15.196    | 30         | 19.3618    | 17.0753  | 18.069   | 30       |
| 17.3143   | 14.5832   | 17.0976    | 26.5237    | 17.1223  | 18.8167  | 30       |
| 15.2457   | 12.4274   | 24.7155    | 18.6071    | 16.8018  | 17.0113  | 30       |
| 17.6719   | 15.003    | 17.7612    | 30         | 17.6189  | 17.6744  | 30       |
| 16.8086   | 15.2064   | 16.1961    | 16.3269    | 17.0057  | 17.6735  | 30       |
| 17.7212   | 15.77     | 18.6863    | 30         | 18.053   | 18.5427  | 30       |
| 16.2131   | 14.2897   | 30         | 30         | 18.0836  | 18.0891  | 30       |
| 16.6684   | 14.4304   | 16.8383    | 19.1884    | 17.2055  | 17.6858  | 30       |
| 16.3044   | 13.9244   | 19.9866    | 18.5453    | 16.6995  | 16.7219  | 30       |
| 16.9499   | 13.3438   | 26.0714    | 24.7241    | 20.2581  | 19.3301  | 19.5773  |
| 13.5736   | 11.064    | 16.5421    | 17.8632    | 15.0905  | 15.0316  | 30       |
| 15.987    | 14.5284   | 18.0306    | 21.9607    | 17.0694  | 19.0418  | 30       |
| 15.0311   | 12.1884   | 17.2385    | 18.4062    | 15.0812  | 15.5312  | 30       |
| 16.1241   | 14.204    | 16.9386    | 26.8736    | 17.5508  | 18.2566  | 30       |
| 15.8114   | 14.3486   | 13.8424    | 13.9899    | 16.4367  | 17.0827  | 18.7171  |
| 19.0407   | 16.4857   | 19.0422    | 30         | 16.9812  | 18.6245  | 30       |
| 17.1598   | 14.2604   | 30         | 30         | 17.717   | 18.4755  | 30       |
| 17.3282   | 15.9276   | 21.557     | 20.2586    | 17.8205  | 19.093   | 30       |
| 17.0004   | 13.6259   | 18.9927    | 30         | 17.188   | 18.3409  | 30       |
| 14.2189   | 12.124    | 18.676     | 19.9454    | 15.6869  | 16.3623  | 30       |
| 17.9257   | 14.297    | 30         | 30         | 17.9245  | 18.5482  | 30       |
| 15.7722   | 13.8151   | 19.4805    | 18.6825    | 18.28    | 20.572   | 30       |
| 18.3966   | 18.235    | 30         | 30         | 17.9925  | 19.1936  | 30       |
| 17.2857   | 14.4005   | 19.0056    | 20.4552    | 19.6494  | 19.3853  | 30       |
| 15.9253   | 13.645    | 16.7       | 17.3736    | 19.8144  | 21.9641  | 18.8419  |
| 16.3418   | 14.553    | 26.0947    | 19.8194    | 19.6845  | 22.4819  | 30       |
| 18.1809   | 16.0088   | 30         | 30         | 18.9794  | 19.8704  | 30       |



| Chga_A39 | Cubn_A51 | Cubn_A63 | Dll4_A75 | Dll4_A87 | Dvl2_A04 | Dvl2_A16 |
|----------|----------|----------|----------|----------|----------|----------|
| 30       | 14.1051  | 30       | 30       | 30       | 30       | 18.8331  |
| 30       | 13.331   | 30       | 30       | 17.7391  | 30       | 30       |
| 30       | 13.7908  | 30       | 30       | 30       | 24.0266  | 16.9999  |
| 30       | 15.5206  | 30       | 30       | 25.2489  | 30       | 18.4124  |
| 30       | 14.4923  | 30       | 30       | 18.5673  | 18.5816  | 16.576   |
| 30       | 13.8086  | 30       | 30       | 30       | 30       | 18.7685  |
| 30       | 13.1203  | 30       | 30       | 30       | 30       | 18.6817  |
| 30       | 12.8628  | 30       | 30       | 17.5539  | 19.1353  | 30       |
| 30       | 13.8591  | 30       | 30       | 17.6562  | 16.4631  | 17.6084  |
| 30       | 15.2137  | 30       | 30       | 30       | 30       | 30       |
| 30       | 17.0029  | 30       | 28.3596  | 30       | 30       | 30       |
| 18.9463  | 13.4226  | 18.4816  | 24.5104  | 30       | 30       | 23.1891  |
| 30       | 12.641   | 30       | 23.459   | 30       | 30       | 30       |
| 30       | 14.2559  | 30       | 23.8787  | 30       | 30       | 18.7511  |
| 18.6559  | 16.1332  | 30       | 30       | 18.903   | 17.5713  | 17.7545  |
| 30       | 15.3421  | 30       | 30       | 30       | 30       | 18.4121  |
| 26.4678  | 10.9943  | 30       | 30       | 17.6714  | 17.0465  | 14.9613  |
| 30       | 14.67    | 30       | 30       | 30       | 19.6218  | 15.9112  |
| 19.0411  | 12.7069  | 17.7045  | 30       | 18.8959  | 19.2173  | 16.3655  |
| 30       | 15.8475  | 30       | 30       | 30       | 30       | 30       |
| 30       | 13.6411  | 30       | 30       | 30       | 30       | 20.6423  |
| 30       | 14.6364  | 30       | 30       | 17.869   | 18.9869  | 16.6744  |
| 19.1927  | 12.4434  | 30       | 30       | 30       | 30       | 15.1207  |
| 30       | 13.1985  | 18.7228  | 30       | 17.1459  | 16.3747  | 17.0669  |
| 30       | 17.4103  | 30       | 30       | 30       | 30       | 17.4298  |
| 30       | 14.3619  | 30       | 30       | 30       | 30       | 15.9351  |
| 30       | 13.9865  | 30       | 30       | 30       | 30       | 18.7984  |
| 30       | 14.2106  | 30       | 30       | 30       | 30       | 17.2246  |
| 30       | 14.0673  | 30       | 30       | 30       | 30       | 18.6437  |
| 30       | 13.2934  | 30       | 30       | 30       | 30       | 18.6855  |
| 30       | 30       | 30       | 30       | 30       | 30       | 18.633   |

| Efnb1_A28 | Efnb1_A40 | Epas1_A52 | Epas1_A64 | Ephb2_A76 | Ephb2_A88 | Ereg_A05 |
|-----------|-----------|-----------|-----------|-----------|-----------|----------|
| 23.8596   | 14.5094   | 15.9193   | 17.9032   | 17.2724   | 13.5612   | 16.347   |
| 30        | 24.6228   | 17.6532   | 30        | 19.1501   | 13.8144   | 15.8039  |
| 17.9152   | 16.3407   | 16.4199   | 17.6084   | 16.9648   | 13.6631   | 15.8415  |
| 16.3405   | 14.7555   | 17.0266   | 30        | 30        | 14.7233   | 16.3184  |
| 14.7789   | 15.1426   | 15.7876   | 30        | 25.5287   | 14.7793   | 16.2885  |
| 18.7114   | 15.5555   | 16.4056   | 30        | 30        | 14.8139   | 17.5191  |
| 30        | 15.1236   | 16.038    | 20.4821   | 16.6136   | 14.0721   | 16.5894  |
| 17.917    | 17.598    | 17.0065   | 30        | 30        | 14.6678   | 16.771   |
| 18.5859   | 30        | 17.6999   | 16.367    | 16.9376   | 16.3143   | 17.7274  |
| 30        | 30        | 28.4843   | 30        | 30        | 14.915    | 16.9213  |
| 18.5848   | 14.6196   | 16.9724   | 17.3993   | 18.7567   | 13.786    | 16.1096  |
| 30        | 15.0761   | 15.9497   | 30        | 30        | 16.1889   | 17.3123  |
| 18.7186   | 15.2202   | 16.5439   | 30        | 30        | 13.6208   | 15.7329  |
| 17.0358   | 15.8134   | 16.8473   | 19.3122   | 30        | 15.4607   | 17.1733  |
| 16.275    | 14.1026   | 14.3236   | 30        | 17.8558   | 13.2597   | 15.3482  |
| 16.7683   | 15.1867   | 16.9978   | 30        | 30        | 15.1645   | 17.2116  |
| 15.0602   | 12.9875   | 13.8965   | 14.5683   | 14.8665   | 12.8342   | 14.4208  |
| 30        | 14.4609   | 18.6861   | 30        | 30        | 15.2066   | 16.6707  |
| 16.8907   | 13.9917   | 14.5857   | 15.9541   | 15.4057   | 13.1861   | 15.8722  |
| 30        | 17.248    | 16.6818   | 18.1141   | 17.8462   | 13.799    | 15.9708  |
| 30        | 16.1971   | 16.0316   | 30        | 30        | 14.0821   | 18.1199  |
| 16.4402   | 17.0866   | 18.5463   | 17.5723   | 16.3907   | 14.0974   | 16.5626  |
| 16.1638   | 17.1002   | 17.1549   | 18.3156   | 17.3068   | 13.1284   | 16.5308  |
| 16.4978   | 13.8128   | 14.5348   | 16.6286   | 17.3567   | 12.9334   | 14.9191  |
| 18.5847   | 16.7685   | 16.9591   | 30        | 17.5987   | 14.0477   | 16.6199  |
| 16.5091   | 16.0547   | 17.2198   | 30        | 30        | 12.8782   | 16.1522  |
| 30        | 15.5996   | 16.8156   | 19.0464   | 18.0505   | 13.0034   | 16.9577  |
| 17.3152   | 14.353    | 15.9185   | 17.5249   | 19.4605   | 13.8173   | 16.6448  |
| 17.3829   | 17.2754   | 18.2011   | 18.5468   | 17.6128   | 13.4593   | 16.3911  |
| 18.5565   | 17.3311   | 18.4441   | 30        | 30        | 12.8406   | 16.7483  |
| 16.6486   | 15.8481   | 16.0809   | 16.6056   | 16.1294   | 13.2943   | 16.2751  |

| Ereg_A17 | Fut2_A29 | Fut2_A41 | Gapdh_A53 | Gapdh_A65 | Gsk3b_A77 | Gsk3b_A89 |
|----------|----------|----------|-----------|-----------|-----------|-----------|
| 30       | 30       | 13.7389  | 13.0354   | 9.62008   | 9.62302   | 14.5532   |
| 30       | 30       | 18.0216  | 17.4916   | 10.8001   | 10.7989   | 14.7997   |
| 30       | 30       | 30       | 30        | 10.3816   | 10.3728   | 15.5034   |
| 30       | 30       | 30       | 17.0734   | 10.3301   | 10.3791   | 13.5531   |
| 30       | 30       | 30       | 21.0962   | 10.1426   | 10.1766   | 14.0693   |
| 30       | 30       | 30       | 30        | 11.0654   | 11.086    | 16.5515   |
| 30       | 30       | 30       | 20.1212   | 10.8023   | 10.7808   | 14.8027   |
| 30       | 30       | 30       | 18.1748   | 10.387    | 10.3951   | 16.7209   |
| 30       | 30       | 30       | 26.55     | 11.342    | 11.3406   | 14.3341   |
| 30       | 30       | 30       | 17.1351   | 11.3078   | 11.3022   | 14.0828   |
| 30       | 30       | 30       | 20.2697   | 10.4498   | 10.4168   | 14.6283   |
| 30       | 30       | 30       | 30        | 11.3139   | 11.3196   | 14.4337   |
| 30       | 30       | 30       | 17.5131   | 10.2539   | 10.2461   | 13.3387   |
| 26.4662  | 30       | 30       | 25.6933   | 11.3549   | 11.3347   | 17.0765   |
| 30       | 30       | 30       | 18.74     | 9.46111   | 9.42132   | 13.4665   |
| 30       | 28.7081  | 30       | 17.9392   | 11.8659   | 12.0118   | 15.0845   |
| 30       | 30       | 30       | 17.9651   | 8.98492   | 9.16098   | 12.8329   |
| 30       | 30       | 30       | 30        | 11.7344   | 11.8596   | 16.0187   |
| 22.0341  | 30       | 30       | 16.6292   | 8.4831    | 8.63712   | 13.8329   |
| 30       | 30       | 30       | 30        | 11.3574   | 11.5356   | 14.6013   |
| 30       | 30       | 30       | 18.7845   | 12.4634   | 12.6258   | 16.0598   |
| 30       | 30       | 30       | 30        | 10.7718   | 10.9005   | 15.7142   |
| 30       | 30       | 30       | 17.3696   | 9.97488   | 10.2641   | 14.0466   |
| 30       | 28.8698  | 30       | 17.735    | 9.10876   | 9.1992    | 12.7783   |
| 30       | 30       | 30       | 30        | 10.7818   | 10.8853   | 15.0323   |
| 30       | 30       | 30       | 30        | 10.6593   | 10.7572   | 15.7142   |
| 30       | 30       | 30       | 17.9727   | 11.9266   | 12.0757   | 15.7814   |
| 30       | 30       | 30       | 19.2392   | 10.9315   | 11.0536   | 15.1085   |
| 30       | 30       | 30       | 30        | 12.115    | 12.2946   | 15.4874   |
| 30       | 30       | 30       | 30        | 10.4026   | 10.5605   | 17.4024   |
| 30       | 30       | 30       | 19.7664   | 10.2589   | 10.3433   | 14.9879   |

| Gusb_A06 | Gusb_A18 | H6pd_A30 | H6pd_A42 | Hes1_A54 | Hes1_A66 | Hes5_A78 |
|----------|----------|----------|----------|----------|----------|----------|
| 13.9391  | 17.2669  | 15.4947  | 17.6197  | 15.7752  | 19.6794  | 16.4217  |
| 15.1013  | 16.3032  | 16.5169  | 18.7552  | 19.7975  | 15.5511  | 14.2392  |
| 14.0587  | 17.5609  | 15.6253  | 19.9095  | 18.7294  | 14.2066  | 12.689   |
| 13.2587  | 16.2371  | 13.6665  | 30       | 18.7444  | 16.2665  | 14.7256  |
| 14.3035  | 19.1694  | 15.3621  | 22.1845  | 18.899   | 14.3799  | 13.2148  |
| 16.5341  | 17.5559  | 17.8618  | 17.982   | 17.151   | 14.3569  | 12.7519  |
| 15.1983  | 15.8787  | 14.8694  | 26.2072  | 18.9606  | 15.2451  | 13.3346  |
| 15.1981  | 16.5989  | 15.3241  | 20.2172  | 17.146   | 14.6252  | 13.3212  |
| 14.6088  | 16.4213  | 17.7396  | 21.178   | 17.8351  | 17.142   | 15.846   |
| 14.5242  | 30       | 16.6836  | 18.1009  | 18.0735  | 14.7866  | 13.2656  |
| 14.8794  | 16.4221  | 16.402   | 18.8939  | 17.0328  | 15.7344  | 14.2571  |
| 13.9611  | 17.6659  | 16.1274  | 19.1796  | 18.1347  | 15.5891  | 14.522   |
| 13.8355  | 17.744   | 15.9362  | 18.2902  | 16.5746  | 14.7645  | 13.6901  |
| 15.7565  | 17.8219  | 14.9867  | 18.1954  | 16.6608  | 13.9106  | 12.5623  |
| 13.8272  | 15.4611  | 13.8596  | 17.7892  | 16.5727  | 16.2308  | 14.5967  |
| 17.7878  | 16.9101  | 15.688   | 30       | 22.1908  | 15.5111  | 14.5879  |
| 12.7259  | 14.9677  | 13.7918  | 19.5129  | 18.211   | 13.2298  | 12.0665  |
| 16.25    | 17.5478  | 15.6149  | 25.5351  | 17.4337  | 18.4263  | 23.092   |
| 13.6776  | 16.0403  | 13.9885  | 17.4601  | 16.6344  | 15.1302  | 13.8332  |
| 14.1323  | 17.6398  | 15.7133  | 19.7198  | 20.2891  | 30       | 30       |
| 17.7546  | 18.1191  | 18.592   | 19.7521  | 20.1351  | 16.1982  | 15.4319  |
| 15.0467  | 18.0393  | 16.402   | 18.6153  | 17.2362  | 15.4597  | 14.241   |
| 14.2352  | 16.037   | 14.9128  | 18.0112  | 17.6794  | 15.9136  | 15.3037  |
| 12.3997  | 15.2397  | 13.5112  | 17.167   | 15.7956  | 13.8302  | 12.5804  |
| 15.3521  | 19.2629  | 15.5649  | 21.0833  | 17.1764  | 18.5802  | 16.6745  |
| 15.0914  | 19.2155  | 16.1217  | 30       | 18.7798  | 16.9147  | 15.2068  |
| 15.326   | 19.1674  | 16.5358  | 30       | 23.4254  | 15.1357  | 13.9157  |
| 14.6191  | 19.3769  | 18.0659  | 20.6221  | 17.4636  | 16.3255  | 13.2749  |
| 16.9969  | 15.9961  | 14.8944  | 17.3224  | 18.4295  | 16.7819  | 15.8001  |
| 16.794   | 16.0404  | 14.8904  | 19.7293  | 16.9305  | 17.8432  | 15.024   |
| 14.717   | 17.1575  | 16.2677  | 17.8642  | 16.6197  | 21.7248  | 18.7447  |

| Hes5_A90 | Hif1a_A07 | Hif1a_A19 | Hopx_A31 | Hopx_A43 | Jag1_A55 | Jag1_A67 |
|----------|-----------|-----------|----------|----------|----------|----------|
| 30       | 25.0344   | 13.9737   | 13.0647  | 12.0439  | 11.9039  | 26.1463  |
| 22.5118  | 22.3734   | 16.8317   | 15.417   | 14.6176  | 14.5364  | 17.2185  |
| 30       | 30        | 30        | 16.0475  | 12.9961  | 12.9297  | 21.6944  |
| 25.7755  | 30        | 15.8749   | 15.323   | 12.9414  | 12.9079  | 23.6625  |
| 27.415   | 30        | 15.0912   | 15.3558  | 13.185   | 13.1521  | 22.1932  |
| 30       | 30        | 16.6812   | 15.4895  | 13.7273  | 13.6852  | 21.0434  |
| 22.2243  | 30        | 15.7978   | 15.865   | 13.2021  | 13.1183  | 19.8655  |
| 21.3317  | 24.0833   | 17.5818   | 14.3151  | 14.361   | 14.2657  | 17.256   |
| 30       | 30        | 15.2447   | 14.4513  | 13.9684  | 13.8608  | 23.0148  |
| 30       | 30        | 18.6701   | 17.3211  | 14.8813  | 14.7182  | 20.1417  |
| 30       | 30        | 15.3577   | 15.1609  | 13.3536  | 13.2322  | 21.8537  |
| 30       | 30        | 15.9981   | 14.667   | 14.142   | 14.0065  | 22.1957  |
| 24.3209  | 30        | 15.8309   | 13.7883  | 12.4432  | 12.3216  | 17.2444  |
| 30       | 30        | 15.2511   | 15.246   | 14.0479  | 13.967   | 24.6324  |
| 30       | 30        | 15.8403   | 13.6312  | 12.8081  | 12.7291  | 17.6586  |
| 30       | 30        | 15.3551   | 15.6181  | 14.0398  | 13.9524  | 17.6917  |
| 25.4276  | 25.5138   | 13.5745   | 13.4211  | 11.7902  | 11.7649  | 16.7533  |
| 30       | 30        | 18.076    | 16.4206  | 13.7054  | 13.7256  | 24.7352  |
| 21.409   | 21.251    | 13.8342   | 13.189   | 12.7566  | 12.7768  | 21.5326  |
| 30       | 30        | 15.5953   | 14.8158  | 13.9193  | 13.872   | 22.4652  |
| 23.0964  | 23.503    | 17.211    | 15.0287  | 13.9941  | 13.9503  | 21.7143  |
| 30       | 26.6181   | 16.4716   | 17.0267  | 13.6227  | 13.6348  | 18.801   |
| 23.0411  | 30        | 15.7859   | 14.4872  | 14.0954  | 14.0407  | 21.9435  |
| 30       | 24.4364   | 13.6971   | 13.0191  | 11.635   | 11.6294  | 19.5537  |
| 30       | 30        | 16.0195   | 14.8482  | 14.9865  | 15.0862  | 22.5195  |
| 30       | 30        | 17.1152   | 16.3879  | 14.4863  | 14.4653  | 18.5425  |
| 30       | 30        | 16.1659   | 15.0425  | 13.9382  | 13.9214  | 26.3792  |
| 22.0414  | 24.1081   | 15.7257   | 16.2912  | 13.9579  | 13.9984  | 23.8356  |
| 30       | 30        | 15.6321   | 15.6321  | 13.9394  | 13.8779  | 16.8678  |
| 30       | 30        | 15.584    | 15.3134  | 14.4083  | 14.427   | 21.898   |
| 30       | 30        | 17.1022   | 15.5334  | 13.6845  | 13.6885  | 20.1855  |

| Lgr5_A79 | Lgr5_A91 | Lrig1_A08 | Lrig1_A20 | Lyz2_A32 | Lyz2_A44 | Msi1_A56 |
|----------|----------|-----------|-----------|----------|----------|----------|
| 30       | 13.6593  | 15.482    | 14.639    | 14.0386  | 21.6017  | 17.3462  |
| 17.3537  | 13.6318  | 14.6212   | 14.5055   | 14.1956  | 20.7539  | 19.8808  |
| 30       | 14.3624  | 15.7549   | 13.0663   | 13.2196  | 21.531   | 30       |
| 30       | 13.571   | 14.6602   | 13.3353   | 13.6254  | 20.3072  | 24.9942  |
| 30       | 14.8278  | 14.9122   | 13.6755   | 13.8877  | 20.3872  | 18.3779  |
| 30       | 14.2479  | 15.4394   | 15.1582   | 14.9002  | 20.3536  | 17.7789  |
| 30       | 12.3495  | 14.1357   | 13.2858   | 12.9221  | 21.3935  | 18.2802  |
| 30       | 14.551   | 19.5199   | 13.7089   | 14.2302  | 21.6649  | 18.5829  |
| 30       | 13.4551  | 14.9978   | 14.6767   | 14.0469  | 10.9147  | 10.9801  |
| 30       | 12.8558  | 14.8367   | 13.9169   | 13.9962  | 21.7942  | 18.1333  |
| 30       | 15.027   | 14.9966   | 14.3601   | 14.4247  | 20.6555  | 17.7056  |
| 18.4636  | 13.6965  | 14.6908   | 13.6524   | 13.6381  | 21.7662  | 18.1245  |
| 17.4826  | 13.2091  | 14.3558   | 12.4869   | 12.7757  | 19.8477  | 20.1817  |
| 30       | 15.7912  | 17.0457   | 13.2497   | 13.3299  | 20.9885  | 20.8319  |
| 15.5835  | 30       | 30        | 13.4431   | 13.7145  | 21.654   | 21.0769  |
| 15.7598  | 14.3253  | 16.5184   | 14.5428   | 14.3858  | 20.5242  | 18.4743  |
| 16.9074  | 12.3289  | 12.8611   | 11.7009   | 11.4236  | 20.769   | 19.8284  |
| 30       | 13.9432  | 15.1791   | 13.6151   | 12.2593  | 21.2255  | 19.8068  |
| 30       | 13.4631  | 14.7616   | 13.1766   | 13.0802  | 16.0223  | 14.3347  |
| 30       | 13.8516  | 15.2716   | 13.6184   | 13.6949  | 22.051   | 30       |
| 30       | 14.8543  | 15.527    | 14.5291   | 14.8153  | 21.0309  | 23.0822  |
| 19.2133  | 13.4739  | 14.0106   | 13.4809   | 12.7003  | 19.0121  | 19.1361  |
| 18.6199  | 12.9136  | 13.9966   | 12.8052   | 12.3747  | 18.6575  | 17.5081  |
| 19.3883  | 13.9769  | 16.6077   | 13.0802   | 13.2142  | 20.0854  | 17.1666  |
| 17.4791  | 30       | 30        | 15.3145   | 15.1848  | 20.8885  | 19.099   |
| 18.6434  | 12.9504  | 15.1638   | 14.4705   | 13.8952  | 21.6256  | 24.3019  |
| 17.6113  | 14.3664  | 16.0353   | 14.3737   | 14.0809  | 21.4116  | 26.8027  |
| 18.5758  | 13.6344  | 15.4604   | 13.9558   | 14.1368  | 21.9273  | 17.9468  |
| 18.6965  | 15.2327  | 16.5325   | 15.1393   | 15.5494  | 21.4457  | 20.6056  |
| 30       | 12.7106  | 13.9743   | 12.8656   | 12.721   | 20.8854  | 19.6826  |
| 18.5966  | 17.413   | 18.8661   | 14.4311   | 15.1196  | 22.0056  | 18.8366  |

| <b>Msi1_A68</b> | <b>Msi2_A80</b> | <b>Msi2_A92</b> | <b>Myb_A09</b> | <b>Myb_A21</b> | <b>Myc_A33</b> | <b>Myc_A45</b> |
|-----------------|-----------------|-----------------|----------------|----------------|----------------|----------------|
| 14.1732         | 15.8739         | 12.2746         | 13.6982        | 14.9124        | 14.7252        | 14.3751        |
| 15.2427         | 17.5736         | 14.5937         | 16.0289        | 13.6076        | 13.3547        | 12.9991        |
| 13.2214         | 16.7696         | 14.4334         | 15.7279        | 13.3344        | 13.0742        | 11.9785        |
| 13.8486         | 15.3341         | 15.1209         | 15.7928        | 12.581         | 12.1778        | 11.9161        |
| 14.4463         | 16.4369         | 15.3034         | 16.4816        | 12.5364        | 12.1576        | 12.4807        |
| 14.8047         | 17.1274         | 16.1597         | 17.79          | 14.0141        | 13.473         | 14.1039        |
| 13.4729         | 17.4603         | 14.6453         | 15.5179        | 12.7619        | 12.894         | 12.608         |
| 14.8475         | 18.3024         | 15.3388         | 17.5129        | 14.2842        | 14.1393        | 12.8616        |
| 15.2907         | 17.5244         | 15.3126         | 16.6059        | 14.1589        | 13.9487        | 12.5528        |
| 14.7505         | 15.9857         | 16.8952         | 18.8867        | 15.4534        | 14.5846        | 14.6577        |
| 14.2874         | 16.3928         | 15.1003         | 15.9165        | 12.8424        | 12.4965        | 13.0357        |
| 14.9735         | 16.9349         | 16.1681         | 17.7209        | 14.1843        | 13.8096        | 13.6928        |
| 13.2149         | 15.8353         | 14.4576         | 15.3929        | 13.1487        | 12.6881        | 11.9359        |
| 14.2871         | 16.0984         | 15.2087         | 17.423         | 14.1035        | 13.4619        | 12.511         |
| 15.9081         | 30              | 14.0015         | 15.4762        | 11.8356        | 11.6333        | 12.5419        |
| 15.9242         | 19.5166         | 16.1783         | 16.279         | 14.8183        | 14.1612        | 12.5947        |
| 12.2368         | 14.3714         | 13.7241         | 14.4295        | 10.8109        | 10.6612        | 10.8412        |
| 14.4257         | 16.4853         | 15.6429         | 17.1584        | 15.1124        | 14.811         | 15.3525        |
| 14.1371         | 16.0755         | 13.9708         | 15.2662        | 12.026         | 11.9062        | 11.2452        |
| 15.186          | 18.1744         | 14.871          | 17.1304        | 13.3722        | 12.819         | 12.3418        |
| 14.8019         | 17.2731         | 15.7693         | 17.0814        | 13.8615        | 13.3625        | 13.4897        |
| 15.0352         | 17.4492         | 15.0937         | 16.5231        | 13.9511        | 13.7938        | 13.1836        |
| 13.0406         | 15.7548         | 15.5711         | 15.7617        | 13.2452        | 13.7049        | 11.9458        |
| 13.4022         | 15.0441         | 13.9881         | 14.9362        | 11.9216        | 11.3466        | 10.6928        |
| 17.2735         | 17.0474         | 17.6196         | 20.7355        | 14.1201        | 13.5989        | 12.6944        |
| 15.802          | 18.4589         | 25.8686         | 18.8538        | 14.2199        | 14.2742        | 13.4524        |
| 16.4505         | 17.0378         | 16.443          | 18.4885        | 14.522         | 14.1588        | 14.3757        |
| 14.901          | 17.1492         | 15.4276         | 17.1273        | 12.8796        | 13.3809        | 13.067         |
| 15.2082         | 19.1244         | 17.1423         | 16.454         | 13.5465        | 13.7391        | 12.8317        |
| 14.5966         | 15.819          | 15.1962         | 17.0177        | 13.1608        | 12.6385        | 12.8234        |
| 15.0182         | 18.8721         | 15.4613         | 16.2011        | 13.1758        | 12.879         | 14.1568        |

| Notch1_A57 | Notch1_A69 | Numb_A81 | Numb_A93 | Olfm4_A10 | Olfm4_A22 | Pcna_A34 |
|------------|------------|----------|----------|-----------|-----------|----------|
| 15.1693    | 15.5613    | 15.9947  | 16.5325  | 14.608    | 8.6687    | 14.9254  |
| 13.8391    | 15.2653    | 15.9218  | 16.9742  | 15.3726   | 10.0895   | 12.8086  |
| 12.9873    | 14.8705    | 17.9813  | 16.6268  | 17.9499   | 8.06717   | 15.4233  |
| 12.1119    | 15.4043    | 14.9054  | 16.5604  | 15.6      | 8.4907    | 13.0307  |
| 12.6807    | 15.9941    | 15.8499  | 19.0554  | 17.0077   | 8.33432   | 13.7856  |
| 15.1102    | 15.4503    | 14.6349  | 16.8845  | 16.4552   | 9.66393   | 14.6902  |
| 13.4906    | 16.2232    | 16.7456  | 17.3655  | 17.2167   | 9.18749   | 13.9571  |
| 12.9099    | 15.8294    | 15.6701  | 17.6889  | 17.025    | 9.39458   | 14.1533  |
| 13.2634    | 18.2489    | 16.8371  | 18.5306  | 15.6808   | 8.77926   | 14.9818  |
| 15.0559    | 15.0683    | 15.133   | 17.9298  | 16.3624   | 8.99931   | 16.9114  |
| 13.3284    | 14.6273    | 14.4911  | 18.7372  | 17.9381   | 7.98124   | 14.179   |
| 14.5776    | 18.7321    | 16.3102  | 16.195   | 16.6827   | 8.82023   | 16.038   |
| 12.6387    | 13.6345    | 13.586   | 16.4942  | 15.4435   | 8.60427   | 13.526   |
| 13.2104    | 16.584     | 15.9876  | 15.6933  | 14.949    | 9.34038   | 13.0112  |
| 12.7322    | 15.2994    | 15.2268  | 16.2865  | 15.4464   | 14.2276   | 11.0601  |
| 13.1346    | 15.238     | 14.8859  | 17.6168  | 16.9622   | 9.45014   | 15.3943  |
| 11.129     | 12.9357    | 12.8033  | 14.6893  | 14.013    | 6.5219    | 12.9018  |
| 16.0436    | 15.2759    | 14.8927  | 17.9126  | 30        | 9.2718    | 14.311   |
| 12.0292    | 14.2967    | 14.6412  | 15.0411  | 14.0119   | 8.61698   | 13.7652  |
| 13.0892    | 15.5197    | 14.8748  | 16.6178  | 15.5009   | 7.94887   | 13.6369  |
| 14.3679    | 16.3628    | 16.554   | 20.0567  | 19.0093   | 9.37708   | 15.2712  |
| 13.7696    | 13.6512    | 14.0594  | 16.4211  | 16.044    | 9.43268   | 15.3827  |
| 12.4434    | 14.0884    | 14.8116  | 18.9286  | 15.9975   | 7.20033   | 13.6691  |
| 10.9422    | 13.9669    | 14.3775  | 16.0114  | 14.9356   | 7.62883   | 13.3578  |
| 13.3886    | 15.7205    | 15.6921  | 16.2109  | 15.7094   | 9.83398   | 13.0262  |
| 14.4164    | 14.6897    | 18.9636  | 17.6988  | 30        | 9.98488   | 15.8061  |
| 15.1937    | 15.4988    | 30       | 19.5005  | 17.9115   | 10.1219   | 16.4799  |
| 13.7877    | 14.0391    | 14.6819  | 17.5288  | 17.1591   | 8.26153   | 14.2642  |
| 13.1835    | 14.3767    | 15.9035  | 19.427   | 17.7556   | 9.37834   | 13.3134  |
| 13.3533    | 14.3774    | 16.9476  | 16.6082  | 16.1415   | 8.67341   | 14.1267  |
| 14.8059    | 14.2935    | 15.8724  | 16.2598  | 15.3029   | 8.32055   | 13.6149  |



| Pcna_A46 | Ppargc1b_A5 | Ppargc1b_A7 | Rhoa_A82 | Rhoa_A94 | Saa2_A11 | Saa2_A23 |
|----------|-------------|-------------|----------|----------|----------|----------|
| 13.97    | 30          | 15.5239     | 11.2333  | 12.6799  | 30       | 21.4756  |
| 12.375   | 16.7564     | 13.8045     | 12.7002  | 14.1046  | 22.7129  | 19.1347  |
| 14.3976  | 15.8002     | 14.7631     | 11.9774  | 13.6094  | 20.225   | 17.9248  |
| 12.1481  | 16.9539     | 15.2893     | 11.1345  | 12.553   | 22.3327  | 17.6891  |
| 12.7442  | 16.3854     | 13.9184     | 11.3481  | 12.8124  | 19.2685  | 17.2113  |
| 14.56    | 16.2396     | 15.1554     | 12.1315  | 14.1582  | 21.1854  | 18.1541  |
| 13.387   | 15.2062     | 13.6767     | 12.1358  | 13.7134  | 30       | 26.6383  |
| 13.2848  | 30          | 15.6169     | 11.949   | 13.2854  | 20.7855  | 18.2925  |
| 13.9433  | 15.9191     | 14.8696     | 12.9514  | 13.4726  | 30       | 30       |
| 15.3162  | 16.0887     | 14.438      | 13.366   | 14.5652  | 18.3442  | 18.1495  |
| 13.2343  | 15.2921     | 13.8884     | 11.8718  | 13.4226  | 21.3181  | 17.0684  |
| 15.9042  | 16.7127     | 14.4031     | 13.4889  | 14.2502  | 21.3104  | 18.4873  |
| 12.6578  | 14.8679     | 13.5279     | 11.49    | 12.4407  | 20.9389  | 18.1292  |
| 12.2747  | 17.3414     | 15.907      | 13.2548  | 14.6837  | 19.4362  | 18.4288  |
| 10.3646  | 14.4955     | 12.9549     | 11.0016  | 12.1697  | 24.091   | 20.2958  |
| 14.3797  | 17.5122     | 15.2926     | 13.8666  | 14.4991  | 19.7962  | 18.1889  |
| 12.152   | 16.8982     | 14.36       | 10.5419  | 11.7689  | 18.7231  | 16.3691  |
| 14.211   | 18.2861     | 15.7364     | 13.2531  | 13.8213  | 19.5613  | 18.3375  |
| 13.13    | 14.1776     | 12.6728     | 11.3235  | 12.5247  | 17.4274  | 16.2004  |
| 12.6675  | 16.2702     | 16.039      | 12.3056  | 13.8461  | 17.8148  | 17.3605  |
| 15.1123  | 16.8979     | 15.6851     | 13.7507  | 14.775   | 30       | 19.6942  |
| 15.6073  | 19.4515     | 15.797      | 13.6424  | 14.5228  | 18.6445  | 16.248   |
| 12.4679  | 17.4201     | 14.9962     | 12.6943  | 14.0675  | 16.5873  | 16.0083  |
| 12.437   | 13.8552     | 13.2393     | 10.3079  | 11.7325  | 23.0121  | 18.2169  |
| 12.4888  | 15.4787     | 13.8297     | 12.2545  | 13.4921  | 19.3028  | 18.5127  |
| 14.6704  | 17.285      | 15.6929     | 13.6568  | 14.5975  | 30       | 30       |
| 16.8309  | 16.3131     | 15.7847     | 12.6119  | 14.59    | 20.7102  | 18.9263  |
| 12.3114  | 16.2911     | 16.6749     | 12.2724  | 14.4146  | 25.3426  | 18.5092  |
| 11.8001  | 15.8858     | 14.7972     | 13.6894  | 13.7834  | 21.7227  | 18.2653  |
| 12.6505  | 15.5339     | 15.4318     | 12.6059  | 14.3878  | 22.9817  | 17.6679  |
| 12.4184  | 15.9782     | 15.3123     | 11.8762  | 13.4972  | 21.4439  | 18.79    |

| Sirt3_A35 | Sirt3_A47 | Sox9_A59 | Sox9_A71 | Tat_A83 | Tat_A95 | Tcf4_A12 |
|-----------|-----------|----------|----------|---------|---------|----------|
| 19.0919   | 16.3038   | 11.9771  | 20.8916  | 30      | 30      | 14.0031  |
| 17.4618   | 17.2555   | 13.7538  | 23.622   | 30      | 30      | 16.6084  |
| 30        | 30        | 12.7124  | 21.5343  | 30      | 30      | 15.2539  |
| 18.0239   | 17.3309   | 12.9334  | 24.3409  | 30      | 30      | 14.8685  |
| 17.3992   | 15.9159   | 13.4177  | 23.2685  | 28.3221 | 30      | 15.9827  |
| 16.8636   | 17.8611   | 14.22    | 22.7948  | 30      | 30      | 17.733   |
| 19.2014   | 15.9006   | 12.5697  | 21.4077  | 30      | 30      | 16.1387  |
| 18.1063   | 18.1758   | 14.1568  | 24.2233  | 23.9736 | 30      | 16.4016  |
| 18.8562   | 30        | 12.9825  | 21.6338  | 30      | 30      | 15.0679  |
| 30        | 18.3958   | 12.6389  | 22.6821  | 30      | 30      | 16.8378  |
| 24.168    | 30        | 12.1909  | 22.2353  | 30      | 30      | 15.3304  |
| 26.8474   | 19.0403   | 12.7956  | 22.2085  | 30      | 30      | 17.6406  |
| 17.3874   | 18.8783   | 12.3231  | 21.6712  | 30      | 30      | 15.1668  |
| 17.5721   | 20.1856   | 14.2498  | 22.7133  | 30      | 30      | 18.2614  |
| 16.8732   | 17.8516   | 13.7406  | 23.6773  | 30      | 30      | 15.3257  |
| 17.8426   | 18.5079   | 14.1518  | 23.2343  | 30      | 30      | 16.1126  |
| 16.8718   | 16.1279   | 11.7236  | 21.0236  | 25.4792 | 30      | 14.0512  |
| 24.0725   | 17.2748   | 16.3704  | 26.7045  | 30      | 30      | 16.7482  |
| 16.9164   | 17.0252   | 12.6245  | 21.9057  | 27.3941 | 30      | 13.9426  |
| 18.0478   | 17.0141   | 12.2197  | 22.7251  | 30      | 30      | 15.4905  |
| 19.118    | 18.2489   | 13.545   | 22.1613  | 25.8311 | 30      | 25.0612  |
| 18.7512   | 19.8471   | 13.555   | 23.9295  | 23.8627 | 30      | 16.0767  |
| 17.3192   | 16.3412   | 12.3603  | 20.0338  | 28.9198 | 30      | 15.0389  |
| 17.8428   | 17.5102   | 11.0828  | 20.7828  | 27.9296 | 30      | 14.5078  |
| 19.2422   | 17.1475   | 15.6222  | 24.7908  | 30      | 30      | 15.6335  |
| 30        | 18.2992   | 12.5104  | 21.3689  | 30      | 30      | 17.6382  |
| 18.565    | 18.6857   | 13.0215  | 22.8905  | 30      | 30      | 16.8218  |
| 16.7342   | 16.7238   | 12.0109  | 21.7295  | 30      | 30      | 15.7131  |
| 30        | 18.2836   | 14.1979  | 22.6077  | 30      | 30      | 16.679   |
| 30        | 30        | 14.2664  | 24.7736  | 30      | 30      | 15.0655  |
| 19.9341   | 30        | 12.6443  | 22.7406  | 30      | 30      | 15.9965  |

| Tcf7l2_A24 | Tert_A36 | Tert_A48 | Wnt3_A60 | Wnt3_A72 | Wnt6_A84 | Wnt6_A96 |
|------------|----------|----------|----------|----------|----------|----------|
| 17.6691    | 30       | 30       | 30       | 30       | 30       | 28.9534  |
| 18.3977    | 30       | 30       | 30       | 30       | 30       | 30       |
| 19.7876    | 30       | 19.5122  | 17.9097  | 25.0201  | 30       | 30       |
| 18.7533    | 30       | 30       | 30       | 30       | 30       | 24.5374  |
| 19.4024    | 23.2428  | 30       | 30       | 30       | 30       | 30       |
| 21.3692    | 30       | 19.6148  | 30       | 30       | 30       | 30       |
| 20.8134    | 26.3638  | 30       | 16.6834  | 17.1573  | 30       | 30       |
| 20.6027    | 23.2165  | 19.6235  | 16.2419  | 17.4726  | 30       | 30       |
| 18.0521    | 30       | 30       | 13.9241  | 14.8189  | 30       | 30       |
| 20.1503    | 30       | 30       | 30       | 23.4833  | 30       | 30       |
| 17.9244    | 22.0462  | 19.1045  | 30       | 25.5798  | 30       | 30       |
| 20.5078    | 18.6632  | 17.8028  | 17.7821  | 30       | 30       | 30       |
| 18.0701    | 30       | 30       | 30       | 30       | 30       | 26.8386  |
| 30         | 30       | 24.4949  | 30       | 30       | 30       | 30       |
| 17.0326    | 30       | 30       | 30       | 26.6511  | 30       | 30       |
| 20.0167    | 30       | 19.3795  | 30       | 27.8103  | 30       | 30       |
| 16.9133    | 16.9883  | 18.3128  | 30       | 30       | 30       | 27.9814  |
| 18.7131    | 25.8814  | 30       | 30       | 27.7935  | 30       | 30       |
| 17.3242    | 18.1887  | 17.9797  | 30       | 30       | 21.1319  | 30       |
| 19.0874    | 30       | 30       | 30       | 30       | 30       | 28.0984  |
| 30         | 30       | 30       | 30       | 30       | 30       | 30       |
| 20.0743    | 16.7183  | 17.0258  | 30       | 27.6855  | 30       | 24.8297  |
| 18.2688    | 18.1909  | 18.2872  | 17.6245  | 20.0008  | 30       | 23.9665  |
| 18.1799    | 30       | 19.7064  | 30       | 28.7518  | 30       | 30       |
| 19.0939    | 18.4638  | 30       | 30       | 30       | 30       | 30       |
| 24.6891    | 30       | 30       | 15.4256  | 17.8871  | 30       | 30       |
| 20.9067    | 30       | 19.3115  | 30       | 30       | 30       | 30       |
| 20.9357    | 30       | 30       | 30       | 30       | 30       | 27.4382  |
| 20.5751    | 30       | 30       | 16.9066  | 16.6744  | 30       | 30       |
| 18.4356    | 30       | 30       | 18.3464  | 30       | 30       | 30       |
| 19.3292    | 15.9598  | 19.0121  | 30       | 24.3365  | 30       | 30       |

## Single Cell Fluidigm Profiling Data and Group Information
